# Supplementary material
Source: PubMed Central journal article supplement (PMC7405989)

# Stereoselective Synthesis of *Cis*- and *Trans*-Tetrasubstituted Vinyl Silanes Using a Silyl-Heck Strategy and Hiyama Conditions for Their Cross-Coupling

Michael F. Wisthoff, Sarah B. Pawley, Andrew P. Cinderella, and Donald A. Watson\*  
Department of Chemistry and Biochemistry, University of Delaware,  
Newark, Delaware 19716, United States

## Supporting Information

| Index                                                                       | Page |
|-----------------------------------------------------------------------------|------|
| 1. General Experimental Details                                             | S2   |
| 2. Instrumentation and Chromatography                                       | S2   |
| 3. Synthesis of Alkynes                                                     | S3   |
| 4. Synthesis of Alkylzinc Halides                                           | S4   |
| 5. Synthesis of Tetrasubstituted Vinylsilanes via Carbosilylation Reactions | S5   |
| 6. Synthesis of Tetrasubstituted Alkenes via Hiyama Cross-Coupling          | S21  |
| 7. Additional Optimization Details                                          | S22  |
| 8. Examination of Silicon Substitution                                      | S24  |
| 9. References                                                               | S24  |
| 10. Spectral Data                                                           | S25  |

## 1. General Experimental Details:

1,4-Dioxane, tetrahydrofuran (THF), and triethylamine (Et<sub>3</sub>N) were dried on alumina according to published procedures<sup>1</sup>. Trimethylsilyl iodide was purchased from Gelest, distilled into a Straus flask containing copper beads, and stored under nitrogen. Dimethylbenzylsilyl iodide,<sup>2</sup> dimethylphenylsilyl iodide,<sup>2</sup> and diphenylmethylsilyl iodide<sup>3</sup> were prepared according to published procedures, distilled into a Straus flask containing copper beads, and stored under nitrogen. Bis(3,5-di-*tert*butylphenyl)(*tert*-butyl)phosphine (JessePhos),<sup>4</sup> (JessePhos)<sub>2</sub>PdCl<sub>2</sub>,<sup>5</sup> tris(3,5-di-*tert*butylphenyl)phosphine (DrewPhos),<sup>3</sup> (DrewPhos)<sub>2</sub>PdI<sub>2</sub>,<sup>3</sup> (COD)Pd(CH<sub>2</sub>TMS)<sub>2</sub>,<sup>6</sup> [(C<sub>6</sub>F<sub>5</sub>)<sub>3</sub>P]<sub>2</sub>PdCl<sub>2</sub>,<sup>7</sup> (*E*)-6-iodo-2-hexene,<sup>8</sup> 2-(3-iodopropyl)-4,4,5,5-tetramethyl-1,3,2-dioxaborolane,<sup>9</sup> iodomethylbenzene,<sup>10</sup> bis(4-methoxyphenyl)acetylene,<sup>11</sup> bis(3-methylphenyl)acetylene,<sup>12</sup> bis(4-fluorophenyl)acetylene,<sup>13</sup> bis(4-chlorophenyl)acetylene,<sup>13</sup> bis(4-bromophenyl)acetylene,<sup>13</sup> bis(4-(trifluoromethyl)phenyl)acetylene,<sup>13</sup> bis(3-chlorophenyl)acetylene,<sup>13</sup> and bis(4-methylphenyl)acetylene<sup>13</sup> were prepared according to the published procedures. All other reagents were purchased in the highest purity from commercial suppliers and used as received.

Vials used in the glovebox were dried in a gravity oven at 140 °C for a minimum of 12 h, transferred into the glovebox hot, and then stored at rt in the glovebox prior to use. All hot glassware was oven dried for a minimum of four hours or flame-dried under vacuum prior to use. "Double manifold" refers to a standard Schlenk-line gas manifold equipped with nitrogen and vacuum (ca. 0.100 mm Hg). All optimization reactions (0.25 mmol) were charged in a nitrogen-filled glovebox and alkyl zinc halide was added on the bench via syringe then stirred on a magnetic stir plate. All yields in optimization reactions were determined using <sup>1</sup>H NMR with 1,3,5-trimethoxybenzene an internal standard and *syn:anti* ratios were determined using GC of unpurified products. All other reactions were set up using standard Schlenk technique and heated with stirring in temperature-controlled oil baths. **Note:** Any product yields listed in the main text that do not match those listed in the supporting information are the average of multiple isolated yields. The procedures listed below reflect yields from specific experimental runs. In this Supporting Information and in the main text, "dioxane" refers to 1,4-dioxane.

## 2. Instrumentation and Chromatography:

400 MHz <sup>1</sup>H, 101 MHz <sup>13</sup>C and 376 MHz <sup>19</sup>F NMR spectra were obtained on a 400 MHz FT-NMR spectrometer equipped with a Bruker CryoPlatform. 600 MHz <sup>1</sup>H, 151 MHz <sup>13</sup>C, 119 MHz <sup>29</sup>Si, 565 MHz <sup>19</sup>F, 193 MHz <sup>11</sup>B, and 243 MHz <sup>31</sup>P spectra were obtained on a 600 MHz FT-NMR spectrometer equipped with a Bruker SMART probe. All samples were analyzed in the indicated deuterio-solvent and were recorded at ambient temperatures. All chemical shifts are reported in ppm. <sup>1</sup>H NMR spectra were calibrated using the residual protio-signal in deuterio-solvents as a standard. <sup>13</sup>C NMR spectra were calibrated using the deuterio-solvent as a standard. IR spectra were recorded on a Nicolet Magma-IR 560 FT-IR spectrometer as thin films on KBr plates. High resolution MS data was obtained on a Waters GCT Premier spectrometer using chemical ionization (CI), electron ionization (EI), or liquid injection field desorption ionization (LIFDI) or a Thermo Q-Exactive Orbitrap using electrospray ionization (ESI). Vacuum controller refers to J-Kem Digital Vacuum Regulator Model 200. Unless otherwise noted, column chromatography was performed either by hand or by use of Isolera 1 Biotage unit with 40-63 μm silica gel for normal phase and an Ultra C18 column for reverse phase. The eluent is reported in parentheses. Analytical thin-layer chromatography (TLC) was performed on silica gel (60 F254 Merck) pre-coated glass plates and visualized by UV or by staining with iodine, KMnO<sub>4</sub>, or cerium ammonium molybdate stain.

### 3. Synthesis of Alkynes

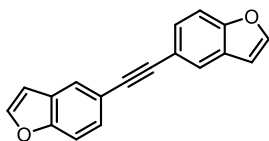

**S1**

Chemical Formula: C<sub>18</sub>H<sub>10</sub>O<sub>2</sub>

Exact Mass: 258.0681

Molecular Weight: 258.2760

(**S1**) **S1** was prepared through a modified version of the procedure described by Grieco<sup>13</sup>. An oven-dried 250 mL round bottom flask equipped with a magnetic stirbar and rubber septum was attached to a double manifold and cooled under vacuum. The septum was removed and the flask was charged with (Ph<sub>3</sub>P)<sub>2</sub>PdCl<sub>2</sub> (840 mg, 1.2 mmol, 6 mol %) and CuI (380 mg, 2.0 mmol, 10 mol %). The septum was then replaced and the flask was evacuated and refilled with nitrogen 3 times. Nitrogen-sparged benzene (100 mL) and nitrogen-sparged DBU (18 mL, 120 mmol, 6 equiv) were added to the flask via cannula addition. 5-bromobenzofuran (2.5 mL, 20 mmol, 1 equiv) was added to the flask via syringe. In rapid succession, trimethylsilylacetylene (1.38 mL, 10 mmol, 0.5 equiv), and nitrogen-sparged water (144 μL, 8.0 mmol, 0.4 equiv) were added to the flask via syringe. The flask allowed to stir at 80 °C in an oil bath for 48h; at the end of which, the flask was removed from the heat and cooled to rt. The reaction mixture was opened to air and transferred to a separatory funnel containing diethyl ether (50 mL) and water (25 mL). The partitioned solution was washed with 2 M aqueous hydrogen chloride solution (3 x 50 mL), water (25 mL), saturated aqueous sodium chloride solution (30 mL), dried over anhydrous magnesium sulfate, filtered, and concentrated *in vacuo*. The crude material was purified via flash column chromatography (1:99 to 5:95 ethyl acetate : hexanes) to provide **S1** as a pale yellow crystalline solid (1.4 g, 54%).

<sup>1</sup>H NMR (400 MHz, CDCl<sub>3</sub>) δ 7.82 (s, 2H), 7.66 (d, J = 2.2 Hz, 2H), 7.55 – 7.45 (m, 4H), 6.78 (d, J = 2.2 Hz, 2H).

<sup>13</sup>C NMR (101 MHz, CDCl<sub>3</sub>) δ 154.6, 145.9, 128.1, 127.7, 124.7, 118.1, 111.7, 106.6, 88.4.

FTIR (cm<sup>-1</sup>): 3774, 1469, 1105, 1026.

mp = 171 – 172 °C.

HRMS (LIFDI) m/z, calcd for [C<sub>18</sub>H<sub>10</sub>O<sub>2</sub>]<sup>+</sup>: 258.0681; found: 258.0687.

## 4. Synthesis of Alkylzinc Halides

### General Procedure A:

An oven dried Schlenk flask equipped with a magnetic stirbar and rubber septum was attached to a double manifold and cooled under vacuum. The flask was backfilled with N<sub>2</sub>, the septum removed, and zinc dust (2 equiv) was added. The septum was replaced and the flask was attached to a double manifold and evacuated. Under vacuum, the zinc was heated for 5 minutes with a heat gun then allowed to cool to room temperature under vacuum. The flask was then backfilled with N<sub>2</sub> and dioxane [2 M] and 1,2-dibromoethane (0.03 equiv) were added. The flask was heated until reflux with a heat gun then allowed to cool. The process was repeated twice and after the flask was cooled to room temperature. Trimethylsilyl chloride (0.03 equiv) was added and the flask was stirred for 15 mins before the alkyl iodide (1 equiv) was added. The flask was then stirred in an oil bath at 100 °C for the indicated time. Conversion of starting halide was monitored via GC by quenching reaction aliquots with saturated NH<sub>4</sub>Cl solution and extracting with Et<sub>2</sub>O. Once all starting halide was consumed, the excess zinc was allowed to settle while the flask cooled. The mixture was cannula filtered to a Schlenk tube. If insoluble particles persisted, filtration through a 0.2 μm PTFE syringe filter was employed. Solutions were then titrated with I<sub>2</sub> according to the literature procedure by Knochel.<sup>14</sup>

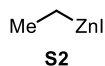

Chemical Formula: C<sub>2</sub>H<sub>5</sub>I<sub>2</sub>Zn  
Exact Mass: 219.8727  
Molecular Weight: 221.3465

**(S2)** According to general procedure A, 100 mL Schlenk flask was charged with zinc dust (13 g, 200 mmol), dioxane (40 mL), trimethylsilyl chloride (380 μL), and 1-iodoethane (8.0 mL, 100 mmol). No 1,2-dibromoethane was added. The flask was heated to 100 °C for 24 h. Filtration and titration resulted in a [1.9 M] solution of ethylzinc iodide in dioxane.

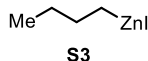

Chemical Formula: C<sub>4</sub>H<sub>9</sub>I<sub>2</sub>Zn  
Exact Mass: 247.9040  
Molecular Weight: 249.4005

**(S3)** According to general procedure A, 100 mL Schlenk flask was charged with zinc dust (16 g, 250 mmol), dioxane (40 mL), trimethylsilyl chloride (475 μL), and 1-iodobutane (15 mL, 125 mmol). No 1,2-dibromoethane was added. The flask was heated to 100 °C for 24 h. Filtration and titration resulted in a [2.0 M] solution of *n*-butylzinc iodide in dioxane.

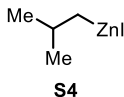

Chemical Formula: C<sub>4</sub>H<sub>9</sub>I<sub>2</sub>Zn  
Exact Mass: 247.9040  
Molecular Weight: 249.4005

**(S4)** According to general procedure A, 25 mL Schlenk flask was charged with zinc dust (2.6 g, 40 mmol), dioxane (10 mL), trimethylsilyl chloride (76 μL), and 1-iodo-2-methylpropane (1.9 mL, 20 mmol). No 1,2-dibromoethane was added. The flask was heated to 100 °C for 24 h. Filtration and titration resulted in a [1.0 M] solution of isobutylzinc iodide in dioxane.

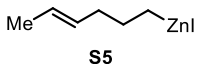

Chemical Formula: C<sub>6</sub>H<sub>11</sub>I<sub>2</sub>Zn  
Exact Mass: 273.9197  
Molecular Weight: 275.4385

**(S5)** According to general procedure A, 25 mL Schlenk flask was charged with zinc dust (2.6 g, 40 mmol), dioxane (10 mL), 1,2-dibromoethane (75 μL), trimethylsilyl chloride (75 μL), and (*E*)-6-iodo-2-hexene (4.2 g, 20 mmol). The flask was heated to 100 °C for 20 h. Filtration and titration resulted in a [0.93 M] solution of (*E*)-2-hexenezinc iodide in dioxane.

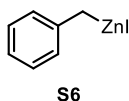

Chemical Formula: C<sub>7</sub>H<sub>7</sub>I<sub>2</sub>Zn  
Exact Mass: 281.8884  
Molecular Weight: 283.4175

**(S6)** According to general procedure A, 25 mL Schlenk flask was charged with zinc dust (2.6 g, 40 mmol), dioxane (10 mL), trimethylsilyl chloride (75 μL), and iodomethylbenzene (4.3 g, 20 mmol). No 1,2-dibromoethane was added. The flask was heated to 100 °C for 24 h. Filtration and titration resulted in a [0.70 M] solution of benzylzinc iodide in dioxane.

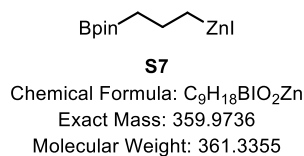

**(S7)** According to general procedure A, 50 mL Schlenk flask was charged with zinc dust (2.1 g, 32 mmol), dioxane (15 mL), 1,2-dibromoethane (100 μL), trimethylsilyl chloride (100 μL), and 2-(3-iodopropyl)-4,4,5,5-tetramethyl-1,3,2-dioxaborolane (4.9 g, 16 mmol). The flask was heated to 100 °C for 24 h. Filtration and titration resulted in a [1.0 M] solution of 3-(4,4,5,5,-tetramethyl-1,3,2-dioxaborolan-2-yl)zinc iodide in dioxane.

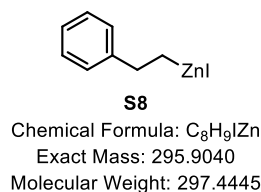

**(S8)** According to general procedure A, 25 mL Schlenk flask was charged with zinc dust (3.9 g, 60 mmol), dioxane (15 mL), 1,2-dibromoethane (100 μL), trimethylsilyl chloride (100 μL), and (2-iodoethyl)-benzene (4.3 mL, 30 mmol). The flask was heated to 100 °C for 24 h. Filtration and titration resulted in a [1.2 M] solution of phenethylzinc iodide in dioxane.

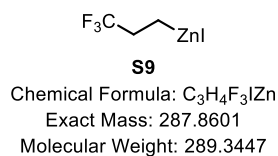

**(S9)** According to general procedure A, 50 mL Schlenk flask was charged with zinc dust (3.9 g, 60 mmol), dioxane (20 mL), 1,2-dibromoethane (155 μL), trimethylsilyl chloride (113 μL), and 1-iodo-3,3,3-trifluoropropane (3.5 mL, 30 mmol). The flask was heated to 100 °C for 24 h. Filtration and titration resulted in a [1.24 M] solution of (3,3,3-trifluoropropyl)zinc iodide in dioxane.

## 5. Synthesis of Tetrasubstituted Vinylsilanes via Multicomponent Carbosilylation Reactions

### General Procedure B: Aryl Alkynes

**Note:** THF was used to quench certain reactions to avoid disiloxane formation upon aqueous workup. This quench generates the more easily separated (4-iodobutoxy)silane through silyl-iodide induced ring opening of THF.

A 25 mL Schlenk flask equipped with a magnetic stirbar and rubber septum was flame-dried, allowed to cool to room temperature under vacuum, and refilled with N<sub>2</sub>. The flask was briefly opened, charged with the given alkyne (1 equiv) and palladium precatalyst (0.02 equiv), and the septum was replaced. The flask was evacuated and refilled with nitrogen 3 times. Dioxane, triethylamine (3 equiv), and silyl-iodide (3 equiv) were added sequentially via syringe at room temperature with stirring. A solution of alkylzinc iodide in dioxane (1.5 equiv) was then added dropwise over 4 h via syringe pump. The reaction was allowed to stir at room temperature for 0.25 h after the addition was completed. The reaction was quenched as indicated and opened to air. The resultant mixture was transferred to a separatory funnel and partitioned between 1 M aqueous hydrogen chloride solution (3 mL) to solubilize the zinc salts, water (10 mL) and diethyl ether (20 mL). The aqueous layer was extracted with diethyl ether (3 x 15 mL). The combined organic layers were washed with saturated aqueous sodium chloride solution (30 mL), dried over anhydrous magnesium sulfate, filtered, and concentrated *in vacuo*. A small aliquot of the crude reaction mixture (~20 μL) was analyzed by gas chromatography or NMR spectroscopy to determine the *syn:anti* ratio. The crude material was purified via silica column chromatography in the given solvent combination, followed by reverse phase column chromatography on a Biotage instrument in the given solvent combination.

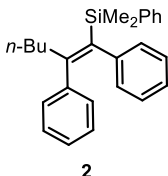

**2**  
 Chemical Formula: C<sub>26</sub>H<sub>30</sub>Si  
 Exact Mass: 370.2117  
 Molecular Weight: 370.6110

**(2)** According to the general procedure B, (Ph<sub>3</sub>P)<sub>2</sub>PdCl<sub>2</sub> (28 mg, 0.04 mmol, 2 mol %), diphenyl acetylene (357 mg, 2.0 mmol, 1 equiv), dioxane (1 mL, 2.0 [M]), triethylamine (836 μL, 6.0 mmol, 3 equiv), and dimethylphenylsilyl iodide (1.12 mL, 6.0 mmol, 3 equiv) were combined under nitrogen. *n*-Butylzinc iodide **S3** in dioxane ([1.5 M], 2.0 mL, 3.0 mmol, 1.5 equiv) was added over 4 h. The reaction was quenched with water, stirred for 0.25 h, and worked up according to the general procedure. Analysis of the crude reaction mixture via gas chromatography revealed a >95:5 *syn:anti* ratio. The product was purified by silica gel chromatography (1 : 99 to 3 : 47 ethyl acetate : hexanes) followed by reverse phase column chromatography on a Biotage instrument using a SNAP Ultra C18 60 g column (7 : 13 to 0 : 100 water : acetonitrile) to afford **2** as a clear colorless oil (702 mg, 95%).

<sup>1</sup>H NMR (600 MHz, CDCl<sub>3</sub>) δ 7.75 – 7.64 (m, 2H), 7.44 – 7.36 (m, 3H), 7.04 (q, *J* = 7.8 Hz, 4H), 6.98 (t, *J* = 7.3 Hz, 1H), 6.92 (dd, *J* = 11.7, 7.3 Hz, 3H), 6.81 (d, *J* = 7.1 Hz, 2H), 2.50 – 2.37 (m, 2H), 1.16 – 0.91 (m, 4H), 0.65 (t, *J* = 7.1 Hz, 3H), 0.28 (s, 6H).

<sup>13</sup>C NMR (151 MHz, CDCl<sub>3</sub>) δ 156.2, 144.6, 143.2, 140.3, 138.2, 133.9, 129.4, 128.9, 128.8, 128.0, 127.4, 127.3, 125.8, 124.6, 38.7, 30.7, 22.8, 14.0, 0.0.

<sup>29</sup>Si NMR (119 MHz, CDCl<sub>3</sub>) δ -11.6.

FTIR (cm<sup>-1</sup>): 3067, 3019, 2956, 2859, 1587, 1486, 1427, 1249, 1112, 834, 809, 699.

HRMS (LIFDI) *m/z*, calcd for [C<sub>26</sub>H<sub>30</sub>Si]<sup>+</sup>: 370.2117; found: 370.2108.

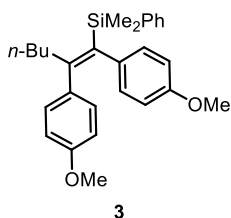

**3**  
 Chemical Formula: C<sub>28</sub>H<sub>34</sub>O<sub>2</sub>Si  
 Exact Mass: 430.2328  
 Molecular Weight: 430.6630

**(3)** According to the general procedure B (Ph<sub>3</sub>P)<sub>2</sub>PdCl<sub>2</sub> (28 mg, 0.04 mmol, 2 mol %), 1,2-bis(4-methoxyphenyl)acetylene (476 mg, 2.0 mmol, 1 equiv), dioxane (1 mL, 2.0 [M]), triethylamine (836 μL, 6.0 mmol, 3 equiv), and dimethylphenylsilyl iodide (1.12 mL, 6.0 mmol, 3 equiv) were combined under nitrogen. *n*-Butylzinc iodide **S3** in dioxane ([1.9 M], 1.6 mL, 3.0 mmol, 1.5 equiv) was added over 4 h. The reaction was quenched with water, stirred for 0.25 h, and worked up according to the general procedure. Analysis of the crude reaction mixture via gas chromatography revealed a 91:9 *syn:anti* ratio. The product was purified by silica gel chromatography (1 : 99 to 3 : 47 ethyl acetate : hexanes) followed by reverse phase column chromatography on a Biotage instrument using a SNAP Ultra C18 60 g column (1:1 to 0 : 100 water : acetonitrile) to afford **3** as a clear colorless oil (692 mg, 81%).

<sup>1</sup>H NMR (600 MHz, CDCl<sub>3</sub>) δ 7.29 – 7.26 (m, 2H), 7.22 (q, *J* = 8.6, 8.1 Hz, 3H), 6.97 (d, *J* = 8.6 Hz, 2H), 6.88 (d, *J* = 8.7 Hz, 2H), 6.82 (d, *J* = 8.7 Hz, 2H), 6.72 (d, *J* = 8.6 Hz, 2H), 3.81 (s, 3H), 3.80 (s, 3H), 2.22 – 2.00 (m, 2H), 1.13 – 0.96 (m, 4H), 0.64 (t, *J* = 7.1 Hz, 3H), -0.14 (s, 6H).

<sup>13</sup>C NMR (151 MHz, CDCl<sub>3</sub>) δ 158.6, 157.4, 156.1, 140.6, 139.3, 136.8, 136.5, 134.0, 130.1, 129.7, 128.3, 127.4, 113.4, 113.1, 55.4, 55.3, 37.1, 30.4, 22.6, 14.0, -0.8.

<sup>29</sup>Si NMR (119 MHz, CDCl<sub>3</sub>) δ -12.7.

FTIR (cm<sup>-1</sup>): 2954, 2831, 2361, 1607, 1508, 1242, 1173, 1108, 1037, 834, 811, 701.

HRMS (LIFDI) *m/z*, calcd for [C<sub>28</sub>H<sub>34</sub>O<sub>2</sub>Si]<sup>+</sup>: 430.2328; found: 430.2325.

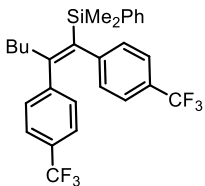

4

Chemical Formula: C<sub>28</sub>H<sub>28</sub>F<sub>6</sub>Si  
 Exact Mass: 506.1864  
 Molecular Weight: 506.6074

(4) According to the general procedure B, [(C<sub>6</sub>F<sub>5</sub>)P]<sub>2</sub>PdCl<sub>2</sub> (51 mg, 0.04 mmol, 2 mol %), 1,2-bis(4-(trifluoromethyl)phenyl)acetylene (628 mg, 2.0 mmol, 1 equiv), dioxane (1 mL, 2.0 [M]), triethylamine (836 μL, 6.0 mmol, 3 equiv), and dimethylphenylsilyl iodide (1.12 mL, 6.0 mmol, 3 equiv) were combined under nitrogen. *n*-Butylzinc iodide **S3** in dioxane ([2.0 M], 1.6 mL, 3.0 mmol, 1.5 equiv) was added over 4 h. The reaction was quenched with water, stirred for 0.25 h, and worked up according to the general procedure. Analysis of the crude reaction mixture via gas chromatography revealed a >95:5 *syn:anti* ratio. The product was purified by silica gel chromatography (1 : 99 to 3 : 47 ethyl acetate : hexanes) followed by reverse phase column chromatography on a Biotage instrument using a SNAP Ultra C18 60 g column (7 : 13 to 0 : 100 water : acetonitrile) to afford **4** as a white solid (866 mg, 85%).

<sup>1</sup>H NMR (600 MHz, CDCl<sub>3</sub>) δ 7.76 – 7.68 (m, 2H), 7.56 – 7.45 (m, 3H), 7.40 (dd, *J* = 10.2, 8.4 Hz, 4H), 7.07 (d, *J* = 8.1 Hz, 2H), 6.98 (d, *J* = 8.0 Hz, 2H), 2.52 (t, *J* = 7.5 Hz, 2H), 1.18 – 1.00 (m, 4H), 0.74 (t, *J* = 6.8 Hz, 3H), 0.38 (s, 6H).

<sup>13</sup>C NMR (151 MHz, CDCl<sub>3</sub>) 155.5, 148.0 (q, *J* = 1.0 Hz), 146.3 (q, *J* = 1.0 Hz), 139.1, 139.0, 133.8, 129.3, 129.3, 128.9, 128.2, 127.2 (q, *J* = 32.3 Hz), 127.2 (q, *J* = 32.3 Hz), 124.7 (q, *J* = 3.0 Hz), 124.6 (q, *J* = 3.4 Hz), 124.4 (q, *J* = 271.8 Hz), 124.2 (q, *J* = 271.7 Hz), 38.4, 30.5, 22.8, 13.9, -0.3.

<sup>29</sup>Si NMR (119 MHz, CDCl<sub>3</sub>) δ -11.2.

<sup>19</sup>F NMR (565 MHz, CDCl<sub>3</sub>) δ -62.3, -62.5.

FTIR (cm<sup>-1</sup>): 3070, 2959, 2931, 2861, 1614, 1326, 1165, 1124, 1068, 1018, 845, 815, 701.

mp = 46 – 48 °C.

HRMS (LIFDI) *m/z*, calcd for [C<sub>28</sub>H<sub>28</sub>F<sub>6</sub>Si]<sup>+</sup>: 506.1864; found: 506.1866.

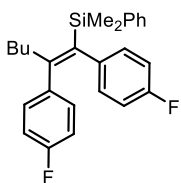

5

Chemical Formula: C<sub>26</sub>H<sub>28</sub>F<sub>2</sub>Si  
 Exact Mass: 406.1928  
 Molecular Weight: 406.5918

(5) According to the general procedure B, (Ph<sub>3</sub>P)<sub>2</sub>PdCl<sub>2</sub> (28 mg, 0.04 mmol, 2 mol %), 1,2-bis(4-fluorophenyl)acetylene (428 mg, 2.0 mmol, 1 equiv), dioxane (1 mL, 2.0 [M]), triethylamine (836 μL, 6.0 mmol, 3 equiv), and dimethylphenylsilyl iodide (1.10 mL, 6.0 mmol, 3 equiv) were combined under nitrogen. *n*-Butylzinc iodide **S3** in dioxane ([1.5 M], 2.0 mL, 3.0 mmol, 1.5 equiv) was added over 4 h. The reaction was quenched with water, stirred for 0.25 h, and worked up according to the general procedure. Analysis of the crude reaction mixture via gas chromatography revealed a >95:5 *syn:anti* ratio. The product was purified by silica gel chromatography (1 : 99 to 3 : 47 ethyl acetate : hexanes) followed by reverse phase column chromatography on a Biotage instrument using a SNAP Ultra C18 60 g column (7 : 13 to 0 : 100 water : acetonitrile) to afford **5** as a white solid (571 mg, 70%).

<sup>1</sup>H NMR (600 MHz, CDCl<sub>3</sub>) δ 7.67 – 7.59 (m, 2H), 7.49 – 7.33 (m, 3H), 6.84 (dd, *J* = 8.0, 5.9 Hz, 2H), 6.82 – 6.64 (m, 6H), 2.50 – 2.22 (m, 2H), 1.11 – 0.85 (m, 4H), 0.65 (t, *J* = 6.7 Hz, 3H), 0.28 (s, 6H).

<sup>13</sup>C NMR (151 MHz, CDCl<sub>3</sub>) δ 161.6 (d, *J* = 76.9 Hz), 160.0 (d, *J* = 75.5 Hz), 155.9, 140.3 (d, *J* = 3.2 Hz), 139.8, 138.8 (d, *J* = 3.2 Hz), 138.0, 133.8, 130.6 (d, *J* = 7.7 Hz), 130.2 (d, *J* = 7.8 Hz), 129.1, 128.0, 114.5 (d, *J* = 6.4 Hz), 114.4 (d, *J* = 6.4 Hz), 38.6, 30.7, 22.8, 14.0, -0.1.

<sup>29</sup>Si NMR (119 MHz, CDCl<sub>3</sub>) δ -11.5.

<sup>19</sup>F NMR (565 MHz, CDCl<sub>3</sub>) δ -116.7, -118.7.

FTIR (cm<sup>-1</sup>): 3068, 2957, 2929, 2860, 1504, 1221, 1157, 834, 816, 701.

mp = 55 – 56 °C.

HRMS (LIFDI) m/z, calcd for [C<sub>26</sub>H<sub>28</sub>F<sub>2</sub>Si]<sup>+</sup>: 406.1928; found: 406.1932.

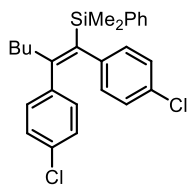

**6**

Chemical Formula: C<sub>26</sub>H<sub>28</sub>Cl<sub>2</sub>Si

Exact Mass: 438.1337

Molecular Weight: 439.4950

**(6)** According to the general procedure B, (Ph<sub>3</sub>P)<sub>2</sub>PdCl<sub>2</sub> (28 mg, 0.04 mmol, 2 mol %), 1,2-bis(4-chlorophenyl)acetylene (552 mg, 2 mmol, 1 equiv), dioxane (20 mL, 0.1 [M]), triethylamine (836 μL, 6 mmol, 3 equiv), and dimethylphenylsilyl iodide (1.12 mL, 6 mmol, 3 equiv) were combined under nitrogen. *n*-Butylzinc iodide **S3** in dioxane ([1.9 M], 1.57 mL, 3 mmol, 1.5 equiv) was added over 4 h. The reaction was quenched with THF, stirred for 0.25 h, and worked up according to the general procedure. Analysis of the crude reaction mixture via gas chromatography revealed a >95:5 *syn:anti* ratio. The product was purified by silica gel chromatography (hexanes) followed by reverse phase column chromatography on a Biotage instrument using a SNAP Ultra C18 60 g column (3 : 17 water : acetonitrile) to afford **6** as a white crystalline solid (542 mg, 62%).

<sup>1</sup>H NMR (400 MHz, CDCl<sub>3</sub>) δ 7.66 – 7.59 (m, 2H), 7.42 – 7.35 (m, 3H), 7.04 (d, *J* = 8.3 Hz, 4H), 6.81 (d, *J* = 8.3 Hz, 2H), 6.71 (d, *J* = 8.3 Hz, 2H), 2.38 (t, *J* = 7.5 Hz, 2H), 0.99 (dt, *J* = 7.5, 3.7 Hz, 4H), 0.68 – 0.60 (m, 3H), 0.27 (s, 6H).

<sup>13</sup>C NMR (101 MHz, CDCl<sub>3</sub>) δ 155.6, 142.8, 141.2, 139.6, 138.1, 133.8, 131.8, 130.6, 130.5, 130.0, 129.1, 128.1, 127.9, 127.8, 38.5, 30.6, 22.8, 14.0, -0.1.

<sup>29</sup>Si NMR (119 MHz, CDCl<sub>3</sub>) δ -11.5.

FTIR (cm<sup>-1</sup>): 2956, 2928, 1486, 1250, 1111, 1090, 1014, 836, 811, 774, 700, 492.

mp = 60 – 61 °C.

HRMS (LIFDI) m/z, calcd for [C<sub>26</sub>H<sub>28</sub>SiCl<sub>2</sub>]<sup>+</sup>: 438.1337; found: 438.1315.

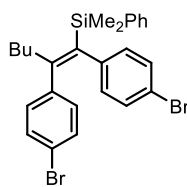

**7**

Chemical Formula: C<sub>26</sub>H<sub>28</sub>Br<sub>2</sub>Si

Exact Mass: 526.0327

Molecular Weight: 528.4030

**(7)** According to the general procedure B, (Ph<sub>3</sub>P)<sub>2</sub>PdCl<sub>2</sub> (14 mg, 0.02 mmol, 2 mol %), 1,2-bis(4-bromophenyl)acetylene (314 mg, 1 mmol, 1 equiv), dioxane (10 mL, 0.1 [M]), triethylamine (418 μL, 3 mmol, 3 equiv), and dimethylphenylsilyl iodide (560 μL, 3 mmol, 3 equiv) were combined under nitrogen. *n*-Butylzinc iodide **S3** in dioxane ([1.9 M], 790 μL, 1.5 mmol, 1.5 equiv) was added over 4 h. The reaction was quenched with THF, stirred for 0.25 h, and worked up according to the general procedure. Analysis of the crude reaction mixture via gas chromatography revealed a >95:5 *syn:anti* ratio. The product was purified by silica gel chromatography (1 : 99 ethyl acetate : hexanes) followed by reverse phase column chromatography on a Biotage instrument using a SNAP Ultra C18 60 g column (3 : 17 water : acetonitrile) to afford **7** as a clear pale yellow oil (335 mg, 63%).

<sup>1</sup>H NMR (400 MHz, CDCl<sub>3</sub>) δ 7.64 (dd, *J* = 6.5, 2.9 Hz, 2H), 7.41 – 7.39 (m, 3H), 7.21 (dd, *J* = 8.3, 6.4 Hz, 4H), 6.78 (d, *J* = 8.4 Hz, 2H), 6.68 (d, *J* = 8.3 Hz, 2H), 2.40 (t, *J* = 7.5 Hz, 2H), 1.02 – 0.98 (m, 4H), 0.65 (t, *J* = 6.9 Hz, 3H), 0.29 (s, 6H).

<sup>13</sup>C NMR (151 MHz, CDCl<sub>3</sub>) δ 155.5, 143.3, 141.7, 139.5, 138.2, 133.8, 130.9, 130.8, 130.8, 130.4, 129.1, 128.1, 120.1, 118.9, 38.4, 30.6, 22.7, 13.9, -0.1.

<sup>29</sup>Si NMR (119 MHz, CDCl<sub>3</sub>) δ -11.5.



FTIR (cm<sup>-1</sup>): 2956, 2928, 1483, 1249, 1110, 1072, 1010, 835, 812, 796, 732, 701, 515.

HRMS (LIFDI) m/z, calcd for [C<sub>26</sub>H<sub>28</sub>Br<sub>2</sub>Si]<sup>+</sup>: 526.0327; found: 526.0328.

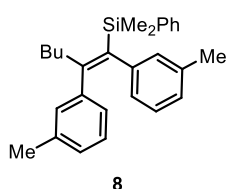

**8**  
Chemical Formula: C<sub>28</sub>H<sub>34</sub>Si  
Exact Mass: 398.2430  
Molecular Weight: 398.6650

**(8)** According to the general procedure B, (Ph<sub>3</sub>P)<sub>2</sub>PdCl<sub>2</sub> (28 mg, 0.04 mmol, 2 mol %), 1,2-bis(3-methylphenyl)acetylene (413 mg, 2.0 mmol, 1 equiv), dioxane (1 mL, 2.0 [M]), triethylamine (836 μL, 6.0 mmol, 3 equiv), and dimethylphenylsilyl iodide (1.12 mL, 6.0 mmol, 3 equiv) were combined under nitrogen. *n*-Butylzinc iodide **S3** in dioxane ([1.9 M], 1.6 mL, 3.0 mmol, 1.5 equiv) was added over 4 h. The reaction was quenched with water, stirred for 0.25 h, and worked up according to the general procedure. Analysis of the crude reaction mixture via gas chromatography revealed a >95:5 *syn:anti* ratio. The product was purified by silica gel chromatography (1 : 99 to 3 : 47 ethyl acetate : hexanes) followed by reverse phase column chromatography on a Biotage instrument using a SNAP Ultra C18 60 g column (7 : 13 to 0 : 100 water : acetonitrile) to afford **8** as a clear colorless oil (621 mg, 81%).

<sup>1</sup>H NMR (600 MHz, CDCl<sub>3</sub>) δ 7.69 (dd, *J* = 7.4, 1.8 Hz, 2H), 7.47 – 7.34 (m, 3H), 6.92 (q, *J* = 7.6 Hz, 2H), 6.79 (d, *J* = 7.5 Hz, 2H), 6.77 – 6.66 (m, 3H), 6.66 – 6.55 (m, 1H), 2.42 – 2.34 (m, 2H), 2.17 (s, 6H), 1.15 – 0.86 (m, 4H), 0.68 – 0.62 (m, 3H), 0.27 (s, 6H).

<sup>13</sup>C NMR (151 MHz, CDCl<sub>3</sub>) δ 156.0, 144.5, 143.1, 140.5, 137.9, 136.5, 133.9, 130.2, 129.5, 128.8, 127.9, 127.2, 127.0, 126.5, 126.4, 125.9, 125.2, 38.7, 30.8, 22.9, 21.5, 21.5, 14.0, 0.0.

<sup>29</sup>Si NMR (119 MHz, CDCl<sub>3</sub>) δ -11.8.

<sup>1</sup>H NMR (400 MHz, C<sub>6</sub>D<sub>6</sub>) δ 7.81 (dd, *J* = 8.0, 1.4 Hz, 2H), 7.36 – 7.29 (m, 3H), 7.28 – 7.21 (m, 1H), 7.02 – 6.93 (m, 1H), 6.94 – 6.78 (m, 5H), 6.76 – 6.62 (m, 2H), 2.66 – 2.50 (m, 1H), 2.01 (d, *J* = 13.5 Hz, 6H), 1.24 (p, *J* = 7.7 Hz, 2H), 1.02 (h, *J* = 7.3 Hz, 2H), 0.65 (t, *J* = 7.3 Hz, 1H), 0.42 (s, 6H).

<sup>13</sup>C NMR (101 MHz, C<sub>6</sub>D<sub>6</sub>) δ 156.4, 144.9, 143.3, 140.6, 138.4, 137.0, 136.9, 134.2, 134.2, 130.3, 129.6, 129.2, 128.4, 127.8, 127.6, 127.1, 126.9, 126.4, 125.9, 39.1, 31.2, 23.1, 21.5, 21.4, 14.1, 0.2.

<sup>29</sup>Si NMR (119 MHz, C<sub>6</sub>D<sub>6</sub>) δ -11.8.

FTIR (cm<sup>-1</sup>): 3049, 3009, 2955, 2925, 2859, 1600, 1483, 1427, 1248, 1112, 826, 780, 702, 469.

HRMS (LIFDI) m/z, calcd for [C<sub>28</sub>H<sub>34</sub>Si]<sup>+</sup>: 398.2430; found: 398.2431.

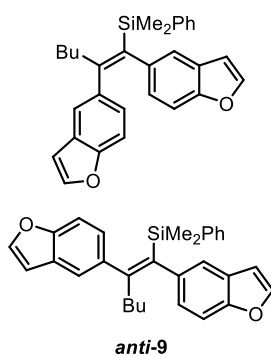

**anti-9**  
Chemical Formula: C<sub>30</sub>H<sub>30</sub>O<sub>2</sub>Si  
Exact Mass: 450.2015  
Molecular Weight: 450.6530

**(9)** According to the general procedure B, (Ph<sub>3</sub>P)<sub>2</sub>PdCl<sub>2</sub> (28 mg, 0.04 mmol, 2 mol %), 1,2-bis(5-benzofuran)acetylene (516 mg, 2 mmol, 1 equiv), dioxane (20 mL, 0.1 [M]), triethylamine (836 μL, 6 mmol, 3 equiv), and dimethylphenylsilyl iodide (1.12 mL, 6 mmol, 3 equiv) were combined under nitrogen. *n*-Butylzinc iodide **S3** in dioxane ([1.9 M], 1.57 mL, 3 mmol, 1.5 equiv) was added over 4 h. The reaction was quenched with THF, stirred for 0.25 h, and worked up according to the general procedure. Analysis of the crude reaction mixture via gas chromatography revealed a 70:30 *syn:anti* ratio. The product was purified by silica gel chromatography (1 : 99 to 5 : 95 ethyl acetate : hexanes) followed by reverse phase column chromatography on a Biotage instrument using a SNAP Ultra C18 60 g column (3 : 17 water : acetonitrile) to afford the separable products **syn-9** as a clear pale yellow oil (353 mg, 40%) and **anti-9** as a clear pale yellow oil (130 mg, 15 %).

### Syn-9:

$^1\text{H}$  NMR (400 MHz,  $\text{CDCl}_3$ )  $\delta$  7.76 – 7.71 (m, 2H), 7.45 (t,  $J$  = 2.4 Hz, 2H), 7.42 (dd,  $J$  = 5.9, 1.2 Hz, 3H), 7.19 (d,  $J$  = 1.3 Hz, 1H), 7.15 (t,  $J$  = 8.7 Hz, 2H), 7.04 (d,  $J$  = 1.3 Hz, 1H), 6.87 (dd,  $J$  = 8.5, 1.6 Hz, 1H), 6.79 (dd,  $J$  = 8.4, 1.7 Hz, 1H), 6.57 (ddd,  $J$  = 5.8, 2.1, 0.8 Hz, 2H), 2.53 – 2.46 (m, 2H), 1.13 – 0.92 (m, 4H), 0.64 (t,  $J$  = 7.0 Hz, 3H), 0.28 (s, 6H).

$^{13}\text{C}$  NMR (101 MHz,  $\text{CDCl}_3$ )  $\delta$  156.5, 153.2, 152.8, 144.7, 144.5, 140.4, 139.3, 138.1, 137.9, 133.9, 128.9, 128.0, 127.9, 126.8, 126.6, 126.2, 125.7, 121.2, 120.9, 110.2, 110.1, 106.7, 106.6, 39.3, 30.8, 22.9, 0.0.

$^{29}\text{Si}$  NMR (119 MHz,  $\text{CDCl}_3$ )  $\delta$  -11.5.

FTIR ( $\text{cm}^{-1}$ ): 2955, 2926, 2857, 1592, 1535, 1465, 1428, 1260, 1200, 1130, 1109, 1031, 832, 770, 737, 701.

HRMS (LIFDI)  $m/z$ , calcd for  $[\text{C}_{30}\text{H}_{30}\text{O}_2\text{Si}]^+$ : 450.2015; found: 450.2021.

### Anti-9

$^1\text{H}$  NMR (400 MHz,  $\text{CDCl}_3$ )  $\delta$  7.62 (t,  $J$  = 2.2 Hz, 2H), 7.45 (d,  $J$  = 8.4 Hz, 1H), 7.33 (d,  $J$  = 8.4 Hz, 1H), 7.26 – 7.13 (m, 7H), 7.03 (dd,  $J$  = 8.4, 1.7 Hz, 1H), 6.97 (dd,  $J$  = 8.4, 1.7 Hz, 1H), 6.76 (dd,  $J$  = 2.1, 0.8 Hz, 1H), 6.66 (dd,  $J$  = 2.1, 0.8 Hz, 1H), 2.22 – 2.14 (m, 2H), 1.13 – 1.04 (m, 2H), 0.99 (dt,  $J$  = 14.3, 6.9 Hz, 2H), 0.59 (t,  $J$  = 7.2 Hz, 3H), -0.19 (s, 6H).

$^{13}\text{C}$  NMR (101 MHz,  $\text{CDCl}_3$ )  $\delta$  156.6, 154.2, 153.4, 145.2, 145.0, 140.4, 140.2, 139.1, 138.5, 133.8, 128.3, 127.3, 127.3, 126.8, 125.4, 125.4, 121.8, 120.6, 110.7, 110.5, 106.8, 106.8, 37.3, 30.4, 22.6, 14.0, -0.9.

$^{29}\text{Si}$  NMR (119 MHz,  $\text{CDCl}_3$ )  $\delta$  -12.9.

FTIR ( $\text{cm}^{-1}$ ): 2955, 2928, 2858, 1591, 1537, 1461, 1428, 1261, 1228, 1130, 1109, 1032, 883, 853, 833, 770, 735, 701.

HRMS (LIFDI)  $m/z$ , calcd for  $[\text{C}_{30}\text{H}_{30}\text{O}_2\text{Si}]^+$ : 450.2015; found: 450.2025.

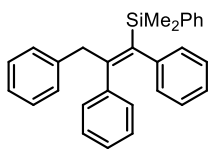

Chemical Formula:  $\text{C}_{29}\text{H}_{28}\text{Si}$   
Exact Mass: 404.1960  
Molecular Weight: 404.6280

(**10**) According to the general procedure B,  $(\text{Ph}_3\text{P})_2\text{PdCl}_2$  (28 mg, 0.04 mmol, 2 mol %), diphenyl acetylene (356 mg, 2 mmol, 1 equiv), dioxane (1 mL, 2.0 [M]), triethylamine (836  $\mu\text{L}$ , 6 mmol, 3 equiv), and dimethylphenylsilyl iodide (1.12 mL, 6 mmol, 3 equiv) were combined under nitrogen. Benzylzinc iodide **56** in dioxane ([1.9 M], 1.58 mL, 3 mmol, 1.5 equiv) was added over 4 h. The reaction was quenched with THF, stirred for 0.25 h, and worked up according to the general procedure. Analysis of the crude reaction mixture via gas chromatography revealed a >95:5 *syn:anti* ratio. The product was purified by silica gel chromatography (1 : 99 ethyl acetate : hexanes) followed by reverse phase column chromatography on a Biotage instrument using a SNAP Ultra C18 60 g column (3 : 17 water : acetonitrile) to afford **10** as a white crystalline solid (634 mg, 78%).

$^1\text{H}$  NMR (400 MHz,  $\text{CDCl}_3$ )  $\delta$  7.70 (dd,  $J$  = 6.4, 3.0 Hz, 2H), 7.42 – 7.39 (m, 3H), 7.06 (dd,  $J$  = 10.3, 7.6 Hz, 5H), 6.95 (d,  $J$  = 7.3 Hz, 1H), 6.93 – 6.83 (m, 7H), 6.79 – 6.74 (m, 2H), 3.84 (s, 2H), 0.34 (s, 6H).

$^{13}\text{C}$  NMR (101 MHz,  $\text{CDCl}_3$ )  $\delta$  153.3, 144.5, 142.4, 140.9, 139.9, 138.9, 134.0, 129.3, 129.1, 129.1, 129.1, 128.2, 128.0, 127.5, 127.1, 125.9, 125.8, 124.8, 44.3, 0.1.

$^{29}\text{Si}$  NMR (119 MHz,  $\text{CDCl}_3$ )  $\delta$  -11.4.

FTIR ( $\text{cm}^{-1}$ ): 3063, 3024, 2954, 1597, 1494, 1427, 1249, 1111, 834, 810, 786, 731, 698.

mp = 72 – 73 °C.

HRMS (LIFDI) m/z, calcd for [C<sub>29</sub>H<sub>28</sub>Si]<sup>+</sup>: 404.1960; found: 404.1957.

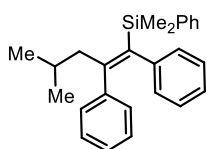

11

Chemical Formula: C<sub>26</sub>H<sub>30</sub>Si  
Exact Mass: 370.2117  
Molecular Weight: 370.6110

(11) According to the general procedure B, (Ph<sub>3</sub>P)<sub>2</sub>PdCl<sub>2</sub> (28 mg, 0.04 mmol, 2 mol %), diphenylacetylene (356 mg, 2.0 mmol, 1 equiv), dioxane (1 mL, 2.0 [M]), triethylamine (836 μL, 6.0 mmol, 3 equiv), and dimethylphenylsilyl iodide (1.12 mL, 6.0 mmol, 3 equiv) were combined under nitrogen. Isobutylzinc iodide **S4** in dioxane ([1.0 M], 2.9 mL, 3.0 mmol, 1.5 equiv) was added over 4 h. The reaction was quenched with water, stirred for 0.25 h, and worked up according to the general procedure. Analysis of the crude reaction mixture via gas chromatography revealed a 92:8 *syn:anti* ratio. The product was purified by silica gel chromatography (1 : 99 to 3 : 47 ethyl acetate : hexanes) followed by reverse phase column chromatography on a Biotage instrument using a SNAP Ultra C18 60 g column (7 : 13 to 0 : 100 water : acetonitrile) to afford **11** as a white solid (687 mg, 93%).

<sup>1</sup>H NMR (400 MHz, CDCl<sub>3</sub>) δ 7.74 – 7.61 (m, 2H), 7.41 (dd, *J* = 4.9, 1.8 Hz, 3H), 7.11 – 7.02 (m, 4H), 7.02 – 6.94 (m, 2H), 6.92 (dd, *J* = 8.2, 1.4 Hz, 2H), 6.82 (dd, *J* = 8.1, 1.2 Hz, 2H), 2.40 (d, *J* = 7.3 Hz, 2H), 1.33 (p, *J* = 7.1 Hz, 1H), 0.64 (d, *J* = 6.6 Hz, 6H), 0.30 (s, 6H).

<sup>13</sup>C NMR (101 MHz, CDCl<sub>3</sub>) δ 154.8, 144.7, 142.8, 140.3, 139.8, 134.1, 129.5, 128.9, 128.7, 127.9, 127.4, 127.3, 125.7, 124.6, 46.6, 26.4, 22.1, 0.1.

<sup>29</sup>Si NMR (119 MHz, CDCl<sub>3</sub>) δ -11.9.

FTIR (cm<sup>-1</sup>): 2955, 1586, 1487, 1427, 1248, 1112, 833, 810, 699, 471.

mp = 71 °C.

HRMS (LIFDI) m/z, calcd for [C<sub>26</sub>H<sub>30</sub>Si]<sup>+</sup>: 370.2117; found: 370.2119.

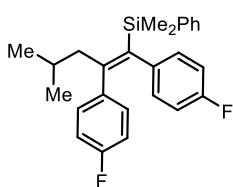

12

Chemical Formula: C<sub>26</sub>H<sub>28</sub>F<sub>2</sub>Si  
Exact Mass: 406.1928  
Molecular Weight: 406.5918

(12) According to the general procedure B, (Ph<sub>3</sub>P)<sub>2</sub>PdCl<sub>2</sub> (28 mg, 0.04 mmol, 2 mol %), 1,2-bis(4-fluorophenyl)acetylene (428 mg, 2.0 mmol, 1 equiv), dioxane (1 mL, 2.0 [M]), triethylamine (836 μL, 6.0 mmol, 3 equiv), and dimethylphenylsilyl iodide (1.12 mL, 6.0 mmol, 3 equiv) were combined under nitrogen. Isobutylzinc iodide **S4** in dioxane ([0.7 M], 4.6 mL, 3.0 mmol, 1.5 equiv) was added over 4 h. The reaction was quenched with water, stirred for 0.25 h, and worked up according to the general procedure. Analysis of the crude reaction mixture via gas chromatography revealed a >95:5 *syn:anti* ratio. The product was purified by silica gel chromatography (1 : 99 to 3 : 47 ethyl acetate : hexanes) followed by reverse phase column chromatography on a Biotage instrument using a SNAP Ultra C18 60 g column (7 : 13 to 0 : 100 water : acetonitrile) to afford **12** as a white solid (667 mg, 82%).

<sup>1</sup>H NMR (400 MHz, CDCl<sub>3</sub>) δ 7.61 (dd, *J* = 6.5, 2.9 Hz, 2H), 7.46 – 7.33 (m, 3H), 6.83 (dd, *J* = 8.6, 5.6 Hz, 2H), 6.78 – 6.68 (m, 6H), 2.36 (d, *J* = 7.3 Hz, 2H), 1.31 (hept, *J* = 7.0 Hz, 1H), 0.62 (d, *J* = 6.6 Hz, 6H), 0.29 (s, 6H).

<sup>13</sup>C NMR (101 MHz, CDCl<sub>3</sub>) δ 161.9 (d, *J* = 44.9 Hz), 159.5 (d, *J* = 43.2 Hz), 154.5, 140.4 (d, *J* = 3.4 Hz), 139.8, 139.5, 138.5 (d, *J* = 3.4 Hz), 134.0, 130.7 (d, *J* = 7.7 Hz), 130.1 (d, *J* = 7.8 Hz), 129.1, 128.0, 114.5 (d, *J* = 7.0 Hz), 114.3 (d, *J* = 7.0 Hz), 46.5, 26.4, 22.0, 0.1.

<sup>29</sup>Si NMR (119 MHz, CDCl<sub>3</sub>) δ -11.8.

<sup>19</sup>F NMR (565 MHz, CDCl<sub>3</sub>) δ -116.6, -118.6.

FTIR (cm<sup>-1</sup>): 3068, 2957, 2869, 1602, 1503, 1249, 1221, 1157, 835, 816, 798, 700, 531.

mp = 73 – 74 °C.

HRMS (LIFDI) m/z, calcd for [C<sub>26</sub>H<sub>28</sub>F<sub>2</sub>Si]<sup>+</sup>: 406.1928; found: 406.1945.

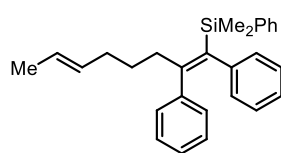

**13**

Chemical Formula: C<sub>28</sub>H<sub>32</sub>Si  
Exact Mass: 396.2273  
Molecular Weight: 396.6490

**(13)** According to the general procedure B, (Ph<sub>3</sub>P)<sub>2</sub>PdCl<sub>2</sub> (28 mg, 0.04 mmol, 2 mol %), diphenyl acetylene (356 mg, 2 mmol, 1 equiv), dioxane (1 mL, 2.0 [M]), triethylamine (836 μL, 6 mmol, 3 equiv), and dimethylphenylsilyl iodide (1.12 mL, 6 mmol, 3 equiv) were combined under nitrogen. (*E*)-2-Hexenezinc iodide **S5** in dioxane ([0.93 M], 3.3 mL, 3 mmol, 1.5 equiv) was added over 4 h. The reaction was quenched with THF, stirred for 0.25 h, and worked up according to the general procedure. Analysis of the crude reaction mixture via gas chromatography revealed a >95:5 *syn:anti* ratio. The product was purified by silica gel chromatography (1 : 99 to 5 : 95 ethyl acetate : hexanes) followed by reverse phase column chromatography on a Biotage instrument using a SNAP Ultra C18 60 g column (3 : 17 water : acetonitrile) to afford **13** as a clear pale yellow oil (453 mg, 57%).

<sup>1</sup>H NMR (400 MHz, CDCl<sub>3</sub>) δ 7.75 – 7.69 (m, 2H), 7.43 (dd, *J* = 5.0, 1.9 Hz, 3H), 7.10 – 7.04 (m, 4H), 7.00 (t, *J* = 7.3 Hz, 1H), 6.98 – 6.91 (m, 3H), 6.87 – 6.83 (m, 2H), 5.31 – 5.19 (m, 1H), 5.19 – 5.10 (m, 1H), 2.57 – 2.25 (m, 2H), 1.67 (q, *J* = 7.3 Hz, 2H), 1.58 (d, *J* = 7.2 Hz, 3H), 1.24 – 1.06 (m, 2H), 0.31 (s, 6H).

<sup>13</sup>C NMR (101 MHz, CDCl<sub>3</sub>) δ 155.9, 144.5, 143.0, 140.3, 138.4, 133.9, 131.1, 129.3, 128.9, 128.8, 128.0, 127.4, 127.3, 125.8, 125.0, 124.6, 38.4, 32.7, 28.5, 18.0, -0.1.

<sup>29</sup>Si NMR (119 MHz, CDCl<sub>3</sub>) δ -11.6.

FTIR (cm<sup>-1</sup>): 3067, 3019, 2954, 2856, 1586, 1486, 1440, 1427, 1249, 1112, 966, 834, 811, 730, 699.

HRMS (LIFDI) m/z, calcd for [C<sub>28</sub>H<sub>32</sub>Si]<sup>+</sup>: 396.2273; found: 396.2256.

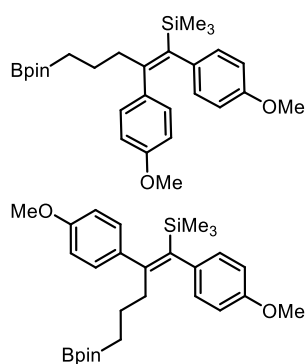

**15**

Chemical Formula: C<sub>28</sub>H<sub>41</sub>O<sub>2</sub>Si  
Exact Mass: 353.1937  
Molecular Weight: 353.5570

**(15)** According to the general procedure B, (Ph<sub>3</sub>P)<sub>2</sub>PdCl<sub>2</sub> (28 mg, 0.04 mmol, 2 mol %), 1,2-bis(4-methoxyphenyl)acetylene (476 mg, 2 mmol, 1 equiv), dioxane (1 mL, 2.0 [M]), triethylamine (836 μL, 6 mmol, 3 equiv), and trimethylsilyl iodide (853 μL, 6 mmol, 3 equiv) were combined under nitrogen. 3-(4,4,5,5-tetramethyl-1,3,2-dioxaborolan-2-yl)zinc iodide **S7** in dioxane ([0.55 M], 5.46 mL, 3 mmol, 1.5 equiv) was added over 4 h. The reaction was quenched with THF, stirred for 0.25 h, and worked up according to the general procedure. Analysis of the crude reaction mixture via gas chromatography revealed a 50:50 *syn:anti* ratio. The product was purified by silica gel chromatography (1 : 99 ethyl acetate : hexanes) followed by reverse phase column chromatography on a Biotage instrument using a SNAP Ultra C18 60 g column (3 : 17 water : acetonitrile) to afford **15** as a clear pale yellow oil (688 mg, 97%, mixture of *syn* and *anti* isomers).

<sup>1</sup>H NMR (400 MHz, CDCl<sub>3</sub>) δ 7.12 (d, *J* = 8.7 Hz, 2H), 6.93 – 6.78 (m, 8H), 6.64 – 6.53 (m, 6H), 3.83 (s, 3H), 3.81 (s, 3H), 3.69 (s, 6H), 2.65 – 2.49 (m, 2H), 2.19 – 2.08 (m, 2H), 1.39 (p, *J* = 8.0 Hz, 2H), 1.21 (s, 14H), 1.11 (s, 12H), 0.76 (t, *J* = 7.8 Hz, 2H), 0.52 (t, *J* = 7.8 Hz, 2H), 0.11 (s, 9H), -0.36 (s, 9H).

$^{13}\text{C}$  NMR (101 MHz,  $\text{CDCl}_3$ )  $\delta$  158.6, 157.2, 157.2, 156.5, 154.0, 153.8, 141.2, 139.6, 137.6, 137.1, 136.9, 135.8, 130.1, 130.0, 130.0, 129.3, 113.4, 113.1, 112.7, 112.6, 83.0, 82.9, 55.4, 55.2, 55.1, 40.9, 39.5, 25.0, 24.8, 23.3, 22.3, 1.2, 0.5.

$^{11}\text{B}$  NMR (193 MHz,  $\text{CDCl}_3$ )  $\delta$  -34.1.

$^{29}\text{Si}$  NMR (119 MHz,  $\text{CDCl}_3$ )  $\delta$  -7.8, -7.6.

FTIR ( $\text{cm}^{-1}$ ): 2976, 2951, 1608, 1508, 1372, 1243, 1173, 1145, 1036, 838.

mp = 72 – 73 °C.

HRMS (FD)  $m/z$ , calcd for  $[\text{C}_{28}\text{H}_{41}\text{BO}_4\text{Si}]^+$ : 480.2867; found: 480.2879.

FTIR ( $\text{cm}^{-1}$ ): 3067, 3019, 2956, 2928, 2859, 1486, 1427, 1248, 1112, 834, 810, 730, 699.

HRMS (LIFDI)  $m/z$ , calcd for  $[\text{C}_{26}\text{H}_{28}\text{SiCl}_2]^+$ : 438.1337; found: 438.1315.

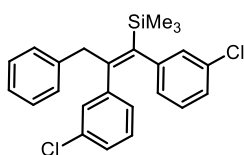

**16**

Chemical Formula:  $\text{C}_{24}\text{H}_{24}\text{Cl}_2\text{Si}$   
Exact Mass: 410.1024  
Molecular Weight: 411.4410

**(16)** According to the general procedure B,  $(\text{Ph}_3\text{P})_2\text{PdCl}_2$  (28 mg, 0.04 mmol, 2 mol %), 1,2-bis(3-chlorophenyl)acetylene (494 mg, 2.0 mmol, 1 equiv), dioxane (1 mL, 2.0 [M]), triethylamine (836  $\mu\text{L}$ , 6.0 mmol, 3 equiv), and trimethylsilyl iodide (853  $\mu\text{L}$ , 6.0 mmol, 3 equiv) were combined under nitrogen. Benzylzinc iodide **S6** in dioxane ([0.8 M], 3.8 mL, 3.0 mmol, 1.5 equiv) was added over 4 h. The reaction was quenched with water, stirred for 0.25 h, and worked up according to the general procedure. Analysis of the crude reaction mixture via gas chromatography revealed a 94:6 *syn:anti* ratio. The product was purified by silica gel chromatography (1 : 99 to 3 : 47 ethyl acetate : hexanes) followed by reverse phase column chromatography on a Biotage instrument using a SNAP Ultra C18 60 g column (7 : 13 to 1 : 9 water : acetonitrile) to afford **16** as a white solid (622 mg, 76%).

$^1\text{H}$  NMR (600 MHz,  $\text{CDCl}_3$ )  $\delta$  7.21 (t,  $J$  = 7.5 Hz, 2H), 7.13 (dd,  $J$  = 16.0, 7.3 Hz, 3H), 7.00 (t,  $J$  = 7.8 Hz, 1H), 6.95 (dt,  $J$  = 8.0, 1.5 Hz, 1H), 6.89 – 6.74 (m, 4H), 6.67 (dd,  $J$  = 7.5, 1.2 Hz, 1H), 6.60 – 6.54 (m, 1H), 3.98 (s, 5H), 0.20 (s, 9H).

$^{13}\text{C}$  NMR (151 MHz,  $\text{CDCl}_3$ )  $\delta$  151.0, 146.2, 144.1, 143.0, 138.3, 133.5, 133.2, 129.0, 128.9, 128.8, 128.7, 128.5, 128.4, 127.4, 127.1, 126.4, 126.2, 125.2, 43.7, 1.1.

$^{29}\text{Si}$  NMR (119 MHz,  $\text{CDCl}_3$ )  $\delta$  -6.5.

FTIR ( $\text{cm}^{-1}$ ): 2953, 1589, 1560, 1251, 933, 839, 789, 762, 696.

mp = 82 – 83 °C.

HRMS (LIFDI)  $m/z$ , calcd for  $[\text{C}_{24}\text{H}_{24}\text{Cl}_2\text{Si}]^+$ : 410.1024; found: 410.1024.

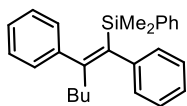

**28**

Chemical Formula:  $\text{C}_{26}\text{H}_{30}\text{Si}$   
Exact Mass: 370.2117  
Molecular Weight: 370.6110

**(28)** According to the general procedure B,  $(\text{JessePhos})_2\text{PdCl}_2$  (44 mg, 0.04 mmol, 2 mol %), diphenylacetylene (357 mg, 2.0 mmol, 1 equiv), dioxane (1 mL, 2.0 [M]), triethylamine (836  $\mu\text{L}$ , 6.0 mmol, 3 equiv), and dimethylphenylsilyl iodide (1.12 mL, 6.0 mmol, 3 equiv) were combined under nitrogen. *n*-Butylzinc iodide **S3** in dioxane ([2.0 M], 1.6 mL, 3.0 mmol, 1.5 equiv) was added over 4 h. The reaction was quenched with water, stirred for 0.25 h, and worked up according to the general procedure. Analysis of the crude reaction mixture via gas chromatography revealed a 13:87 *syn:anti* ratio. The product was purified by silica gel chromatography (1 : 99 to 3 : 47 ethyl acetate : hexanes) followed by reverse phase column

chromatography on a Biotage instrument using a SNAP Ultra C18 60 g column (7 : 13 to 0 : 100 water : acetonitrile) to afford **28** as a clear colorless oil (565 mg, 76%).

$^1\text{H}$  NMR (600 MHz,  $\text{CDCl}_3$ )  $\delta$  7.31 (q,  $J = 6.0, 4.7$  Hz, 5H), 7.28 – 7.23 (m, 5H), 7.20 (t,  $J = 7.4$  Hz, 1H), 7.16 – 7.09 (m, 2H), 7.04 – 7.00 (m, 2H), 2.26 – 2.11 (m, 2H), 1.10 (ddt,  $J = 35.4, 14.7, 7.1$  Hz, 4H), 0.67 (t,  $J = 7.2$  Hz, 3H), -0.12 (s, 6H).

$^{13}\text{C}$  NMR (151 MHz,  $\text{CDCl}_3$ )  $\delta$  156.0, 144.4, 143.9, 140.3, 139.9, 134.0, 129.1, 128.8, 128.4, 127.9, 127.8, 127.4, 126.9, 125.3, 37.1, 30.3, 22.6, 13.9, -1.0.

$^{29}\text{Si}$  NMR (119 MHz,  $\text{CDCl}_3$ )  $\delta$  -12.6.

FTIR ( $\text{cm}^{-1}$ ): 3068, 3022, 2956, 2927, 2858, 1596, 1442, 1427, 1247, 1110, 833, 812, 770, 701, 471.

HRMS (LIFDI)  $m/z$ , calcd for  $[\text{C}_{26}\text{H}_{30}\text{Si}]^+$ : 370.2117; found: 370.2173.

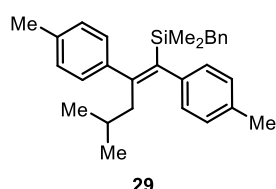

Chemical Formula:  $\text{C}_{29}\text{H}_{36}\text{Si}$   
Exact Mass: 412.2586  
Molecular Weight: 412.6920

**(29)** According to the general procedure B, (JessePhos) $_2$ PdCl $_2$  (44 mg, 0.04 mmol, 2 mol %), 1,2-bis(4-methylphenyl)acetylene (413 mg, 2.0 mmol, 1 equiv), dioxane (1 mL, 2.0 [M]), triethylamine (0.836 mL, 6.0 mmol, 3 equiv), and dimethylbenzylsilyl iodide (1.13 mL, 6.0 mmol, 3 equiv) were combined under nitrogen. Isobutylzinc iodide **S4** in dioxane ([1.3 M], 2.5 mL, 3.0 mmol, 1.5 equiv) was added over 4 h. The reaction was quenched with water, stirred for 0.25 h, and worked up according to the general procedure. Analysis of the crude reaction mixture via gas chromatography revealed a <5:95 *syn:anti* ratio. The product was purified by silica gel chromatography (1 : 99 to 3 : 47 ethyl acetate : hexanes)

followed by reverse phase column chromatography on a Biotage instrument using a SNAP Ultra C18 60 g column (7 : 13 to 0 : 100 water : acetonitrile) to afford **29** as a white solid (208 mg, 50%).

$^1\text{H}$  NMR (600 MHz,  $\text{CDCl}_3$ )  $\delta$  7.2 – 7.1 (m, 6H), 7.1 (d,  $J = 8.0$  Hz, 2H), 7.0 – 7.0 (m, 1H), 6.9 – 6.8 (m, 4H), 2.4 (d,  $J = 5.6$  Hz, 6H), 2.1 (d,  $J = 7.2$  Hz, 2H), 1.8 (s, 2H), 1.3 (hept,  $J = 6.8$  Hz, 1H), 0.7 (d,  $J = 6.6$  Hz, 6H), -0.5 (s, 6H).

$^{13}\text{C}$  NMR (101 MHz,  $\text{CDCl}_3$ )  $\delta$  154.4, 141.5, 141.3, 140.8, 140.7, 136.6, 134.5, 128.8, 128.7, 128.6, 128.6, 128.5, 128.1, 123.9, 45.9, 26.4, 26.0, 22.5, 21.4, 21.3, -1.6.

$^{29}\text{Si}$  NMR (119 MHz,  $\text{CDCl}_3$ )  $\delta$  -7.4.

FTIR ( $\text{cm}^{-1}$ ): 3024, 2955, 2928, 2869, 1600, 1493, 1452, 1248, 1205, 1154, 833, 761, 698.

mp = 89 – 90 °C

HRMS (LIFDI)  $m/z$ , calcd for  $[\text{C}_{24}\text{H}_{24}\text{F}_2\text{Si}]^+$ : 412.2586; found: 412.2586.

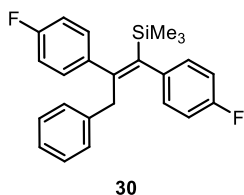

Chemical Formula:  $\text{C}_{24}\text{H}_{24}\text{F}_2\text{Si}$   
Exact Mass: 378.1615  
Molecular Weight: 378.5378

**(30)** According to the general procedure B, (JessePhos) $_2$ PdCl $_2$  (44 mg, 0.04 mmol, 2 mol %), 1,2-bis(4-fluorophenyl)acetylene (428 mg, 2.0 mmol, 1 equiv), dioxane (1 mL, 2.0 [M]), triethylamine (836  $\mu\text{L}$ , 6.0 mmol, 3 equiv), and trimethylsilyl iodide (853  $\mu\text{L}$ , 6.0 mmol, 3 equiv) were combined under nitrogen. Benzylzinc iodide **S6** in dioxane ([0.8 M], 3.8 mL, 3.0 mmol, 1.5 equiv) was added over 4 h. The reaction was quenched with water, stirred for 0.25 h, and worked up according to the general procedure. Analysis of the crude reaction mixture via gas chromatography revealed a <5:95 *syn:anti* ratio. The product was purified by silica gel chromatography (1 : 99 to 3 : 47 ethyl acetate : hexanes) followed by

reverse phase column chromatography on a Biotage instrument using a SNAP Ultra C18 60 g column (7 : 13 to 0 : 100 water : acetonitrile) to afford **30** as a white solid (544 mg, 72%).

$^1\text{H}$  NMR (600 MHz,  $\text{CDCl}_3$ )  $\delta$  7.14 – 7.02 (m, 7H), 6.96 (dd,  $J$  = 8.7, 5.6 Hz, 2H), 6.90 (t,  $J$  = 8.7 Hz, 2H), 6.80 – 6.71 (m, 2H), 3.48 (s, 3H), -0.32 (s, 9H).

$^{13}\text{C}$  NMR (101 MHz,  $\text{CDCl}_3$ )  $\delta$  162.8 (d,  $J$  = 84.9 Hz), 160.4 (d,  $J$  = 83.2 Hz), 151.7, 142.5, 140.1 (d,  $J$  = 3.4 Hz), 139.1 (d,  $J$  = 3.3 Hz), 138.9, 130.8 (d,  $J$  = 7.9 Hz), 129.7 (d,  $J$  = 7.7 Hz), 129.2, 128.1, 125.9, 115.2 (d,  $J$  = 21.1 Hz), 114.6 (d,  $J$  = 21.1 Hz), 43.4, 0.3.

$^{29}\text{Si}$  NMR (119 MHz,  $\text{CDCl}_3$ )  $\delta$  -6.7.

$^{19}\text{F}$  NMR (565 MHz,  $\text{CDCl}_3$ )  $\delta$  -115.6, -117.9.

FTIR ( $\text{cm}^{-1}$ ): 3029, 2956, 2896, 1601, 1506, 1246, 1223, 1155, 838, 826, 762, 700.

mp = 93 – 94 °C.

HRMS (LIFDI)  $m/z$ , calcd for  $[\text{C}_{24}\text{H}_{24}\text{F}_2\text{Si}]^+$ : 378.1615; found: 378.1612.

### General Procedure C: Alkyl Alkynes

**Note:** THF was used to quench certain reactions to avoid disiloxane formation upon aqueous workup. This quench generates the more easily separated (4-iodobutoxy)silane through silyl-iodide induced ring opening of THF.

A 25 mL Schlenk flask equipped with a magnetic stirbar and rubber septum was flame-dried and allowed to cool to room temperature under vacuum and refilled with nitrogen. The flask was briefly opened, charged with palladium precatalyst (0.05 equiv), and the septum was replaced. The flask was evacuated and refilled with  $\text{N}_2$  three times. Dioxane (0.5 mL), triethylamine (5 equiv), silyl-iodide (5 equiv), and alkyne (1 equiv) were added sequentially via syringe at room temperature with stirring. A solution of alkylzinc iodide in dioxane (5 equiv) was then added dropwise over 4 h via syringe pump. The reaction was allowed to stir at room temperature for 0.25 h after the addition was completed. The reaction was quenched as indicated and opened to air. The resultant mixture was transferred to a separatory funnel and partitioned between 1 N aqueous hydrogen chloride solution (3 mL) to solubilize the zinc salts, water (10 mL), and diethyl ether (20 mL). The aqueous layer was extracted with diethyl ether (3 x 15 mL). The combined organic layers were washed with saturated aqueous sodium chloride solution (30 mL) and dried over anhydrous magnesium sulfate, filtered, and concentrated *in vacuo*. A small aliquot of the crude reaction mixture (~20  $\mu\text{L}$ ) was analyzed by gas chromatography or NMR spectroscopy to determine the *syn:anti* ratio. The crude material was purified via silica column chromatography in the indicated solvent combination followed by reverse phase column chromatography on a Biotage instrument using a SNAP Ultra C18 60 g column in the indicated

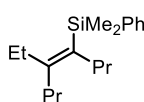

**16**

Chemical Formula:  $\text{C}_{18}\text{H}_{30}\text{Si}$

Exact Mass: 274.2117

Molecular Weight: 274.5230

**(16)** According to the general procedure C,  $(\text{DrewPhos})_2\text{PdI}_2$  (156 mg, 0.1 mmol, 5 mol %), dioxane (1 mL), triethylamine (1.4 mL, 10 mmol, 5 equiv), dimethylphenylsilyl iodide (1.80 mL, 10 mmol, 5 equiv), and 4-octyne (293  $\mu\text{L}$ , 2 mmol, 1 equiv) were combined under nitrogen. Ethylzinc iodide **S2** in dioxane ([1.6 M], 6.25 mL, 10 mmol, 5 equiv) was added over 4 h. The reaction was worked up according to the general procedure. Analysis of the crude reaction mixture via gas chromatography revealed a 92:8 *syn:anti* ratio. The product was purified by silica gel chromatography (hexanes) followed by reverse phase column chromatography on a Biotage instrument using a SNAP Ultra C18 60 g column (3 : 17 water : acetonitrile) to afford **16** as a clear colorless oil (502 mg, 91%).

$^1\text{H}$  NMR (400 MHz,  $\text{CDCl}_3$ )  $\delta$  7.58 – 7.42 (m, 2H), 7.36 – 7.27 (m, 3H), 2.11 (td,  $J$  = 8.2, 2.9 Hz, 4H), 1.99 (q,  $J$  = 7.4 Hz, 2H), 1.42 (dd, 2H), 1.30 (dd,  $J$  = 15.9, 7.6 Hz, 2H), 0.94 (t,  $J$  = 7.3 Hz, 3H), 0.89 (t,  $J$  = 7.3 Hz, 3H), 0.77 (t,  $J$  = 7.4 Hz, 3H), 0.35 (s, 6H).

$^{13}\text{C}$  NMR (101 MHz,  $\text{CDCl}_3$ )  $\delta$  155.0, 141.5, 133.9, 130.3, 128.5, 127.7, 34.2, 32.8, 29.9, 24.7, 22.4, 14.7, 14.5, 13.4, 0.2.

$^{29}\text{Si}$  NMR (119 MHz,  $\text{CDCl}_3$ )  $\delta$  -11.1.

FTIR ( $\text{cm}^{-1}$ ): 2959, 2930, 2870, 1595, 1464, 1428, 1248, 1107, 819, 770, 700.

HRMS (LIFDI)  $m/z$ , calcd for  $[\text{C}_{16}\text{H}_{27}\text{OSi}]^+$ : 274.2117; found: 274.2108.

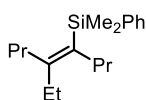

**17**

Chemical Formula:  $\text{C}_{18}\text{H}_{30}\text{Si}$

Exact Mass: 274.2117

Molecular Weight: 274.5230

**(17)** According to the general procedure C, (*JessePhos*) $_2\text{PdCl}_2$  (111 mg, 0.1 mmol, 5 mol %), dioxane (1 mL), triethylamine (1.4 mL, 10 mmol, 5 equiv), dimethylphenylsilyl iodide (1.80 mL, 10 mmol, 5 equiv), and 4-octyne (293  $\mu\text{L}$ , 2 mmol, 1 equiv) were combined under nitrogen. Ethylzinc iodide **S2** in dioxane ([1.6 M], 6.25 mL, 10 mmol, 5 equiv) was added over 4 h. The reaction was worked up according to the general procedure. Analysis of the crude reaction mixture via gas chromatography revealed a <5 : 95 *syn:anti* ratio. The product was purified by silica gel chromatography (hexanes) followed by reverse phase column chromatography on a Biotage instrument using a SNAP Ultra C18 60 g column (3 : 17 water : acetonitrile) to afford **17** as a clear colorless oil (420 mg, 77%).

$^1\text{H}$  NMR (600 MHz,  $\text{CDCl}_3$ )  $\delta$  7.55 – 7.46 (m, 2H), 7.33 – 7.29 (m, 3H), 2.14 (q,  $J = 7.6$  Hz, 2H), 2.12 – 2.07 (m, 2H), 1.96 – 1.89 (m, 2H), 1.29 (dt,  $J = 15.0, 7.4$  Hz, 2H), 1.19 (dt, 2H), 1.00 (t,  $J = 7.5$  Hz, 3H), 0.88 (t,  $J = 7.3$  Hz, 3H), 0.64 (t,  $J = 7.3$  Hz, 3H), 0.36 (s, 6H).

$^{13}\text{C}$  NMR (151 MHz,  $\text{CDCl}_3$ )  $\delta$  155.4, 141.5, 133.9, 130.2, 128.5, 127.7, 38.9, 34.2, 24.7, 24.2, 22.3, 14.5, 14.2, 13.9, 0.1.

$^{29}\text{Si}$  NMR (119 MHz,  $\text{CDCl}_3$ )  $\delta$  -11.2.

FTIR ( $\text{cm}^{-1}$ ): 2959, 2930, 2871, 1597, 1464, 1427, 1248, 1108, 818, 770, 700.

HRMS (LIFDI)  $m/z$ , calcd for  $[\text{C}_{16}\text{H}_{27}\text{OSi}]^+$ : 274.2117; found: 274.2119.

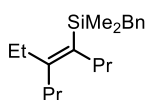

**18**

Chemical Formula:  $\text{C}_{19}\text{H}_{32}\text{Si}$

Exact Mass: 288.2273

Molecular Weight: 288.5500

**(18)** According to the general procedure C, (*DrewPhos*) $_2\text{PdI}_2$  (156 mg, 0.1 mmol, 5 mol %), dioxane (1 mL), triethylamine (1.4 mL, 10 mmol, 5 equiv), dimethylbenzylsilyl iodide (1.80 mL, 10 mmol, 5 equiv), and 4-octyne (293  $\mu\text{L}$ , 2 mmol, 1 equiv) were combined under nitrogen. Ethylzinc iodide **S2** in dioxane ([1.6 M], 6.25 mL, 10 mmol, 5 equiv) was added over 4 h. The reaction was worked up according to the general procedure. Analysis of the crude reaction mixture via gas chromatography revealed a >95:5 *syn:anti* ratio. The product was purified by silica gel chromatography (hexanes) followed by reverse phase column chromatography on a Biotage instrument using a SNAP Ultra C18 60 g column (3:17 water : acetonitrile) to afford **18** as a clear colorless oil (496 mg, 86%).

$^1\text{H}$  NMR (600 MHz,  $\text{CDCl}_3$ )  $\delta$  7.17 (t,  $J = 7.7$  Hz, 2H), 7.04 (tt,  $J = 7.3, 1.3$  Hz, 1H), 7.01 – 6.95 (m, 2H), 2.19 (s, 2H), 2.11 (q,  $J = 7.4$  Hz, 2H), 2.09 – 2.02 (m, 2H), 1.97 – 1.86 (m, 2H), 1.47 – 1.29 (m, 2H), 1.13 (ddd,  $J = 12.4, 9.3, 5.7$  Hz, 2H), 0.98 (t,  $J = 7.4$  Hz, 3H), 0.93 (t,  $J = 7.3$  Hz, 3H), 0.85 (t,  $J = 7.3$  Hz, 3H), 0.08 (s, 6H).

$^{13}\text{C}$  NMR (151 MHz,  $\text{CDCl}_3$ )  $\delta$  154.2, 140.8, 131.1, 128.5, 128.1, 123.9, 34.2, 33.0, 29.4, 27.5, 24.4, 22.3, 14.7, 14.5, 14.1, -0.8.

$^{29}\text{Si}$  NMR (119 MHz,  $\text{CDCl}_3$ )  $\delta$  -6.8.



FTIR (cm<sup>-1</sup>): 2959, 2930, 2871, 1600, 1493, 1453, 1248, 1206, 1155, 829, 760, 698, 477.

HRMS (LIFDI) m/z, calcd for [C<sub>16</sub>H<sub>27</sub>OSi]<sup>+</sup>: 288.2273; found: 288.2263.

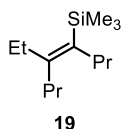

**19**

Chemical Formula: C<sub>13</sub>H<sub>28</sub>Si  
Exact Mass: 212.1960  
Molecular Weight: 212.4520

**(19)** According to the general procedure C, (DrewPhos)<sub>2</sub>PdI<sub>2</sub> (156 mg, 0.1 mmol, 5 mol %), dioxane (1 mL), triethylamine (1.4 mL, 10 mmol, 5 equiv), trimethylsilyl iodide (1.40 mL, 10 mmol, 5 equiv), and 4-octyne (293 μL, 2 mmol, 1 equiv) were combined under nitrogen. Ethylzinc iodide **S2** in dioxane ([1.6 M], 6.25 mL, 10 mmol, 5 equiv) was added over 4 h. The reaction was worked up according to the general procedure. Analysis of the crude reaction mixture via gas chromatography revealed a >95:5 *syn:anti* ratio. The product was purified by silica gel chromatography (hexanes) followed by reverse phase column chromatography on a Biotage instrument using a SNAP Ultra C18 60 g column (3 : 17 water : acetonitrile) to afford **19** as a clear colorless oil (312 mg, 73%).

<sup>1</sup>H NMR (600 MHz, CDCl<sub>3</sub>) δ 2.13 (q, *J* = 7.4 Hz, 2H), 2.08 – 2.03 (m, 2H), 2.03 – 1.98 (m, 2H), 1.42 – 1.32 (m, 2H), 1.28 – 1.15 (m, 2H), 0.97 (t, *J* = 7.4 Hz, 3H), 0.90 (dt, *J* = 10.9, 7.3 Hz, 6H), 0.12 (s, 9H).

<sup>13</sup>C NMR (151 MHz, CDCl<sub>3</sub>) δ 153.0, 132.8, 34.1, 32.9, 29.3, 24.6, 22.4, 14.6, 14.5, 14.1, 1.3.

<sup>29</sup>Si NMR (119 MHz, CDCl<sub>3</sub>) δ -7.9.

FTIR (cm<sup>-1</sup>): 2959, 2931, 2871, 1465, 1248, 849, 835, 757.

HRMS (ESI) m/z, calcd for [C<sub>16</sub>H<sub>27</sub>OSi]<sup>+</sup>: 213.2033; found: 213.1841.

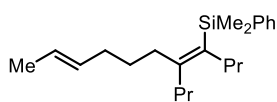

**20**

Chemical Formula: C<sub>22</sub>H<sub>36</sub>Si  
Exact Mass: 328.2586  
Molecular Weight: 328.6150

**(20)** According to the general procedure C, (DrewPhos)<sub>2</sub>PdCl<sub>2</sub> (78 mg, 0.05 mmol, 5 mol %), triethylamine (700 μL, 5 mmol, 5 equiv), dimethylphenylsilyl iodide (940 μL, 5 mmol, 5 equiv), and 4-octyne (146 μL, 1 mmol, 1 equiv) were combined under nitrogen. *No dioxane was added to the initial reaction mixture.* (*E*)-2-Hexenezinc iodide **S5** in dioxane ([1.26M], 3.9 mL, 5 mmol, 5 equiv) was added over 4 h. The reaction was quenched with THF, stirred for 0.25 h, and worked up according to the general procedure. Palladium scavenger 1-pyrrolidinecarbodithioic acid ammonium salt was added to the drying organic solution. Analysis of the crude reaction mixture via gas chromatography revealed a >95:5 *syn:anti* ratio. The product was purified by silica gel chromatography (0 : 100 to 5 : 95 ethyl acetate : hexanes) followed by reverse phase column chromatography on a Biotage instrument using a SNAP Ultra C18 60 g column (1 : 3 to 0 : 1 water : acetonitrile) to afford **20** as a clear colorless oil (220 mg, 67%).

<sup>1</sup>H NMR (400 MHz, CDCl<sub>3</sub>) δ 7.51 (dd, *J* = 6.4, 3.1 Hz, 2H), 7.35 – 7.28 (m, 3H), 5.33 – 5.15 (m, 2H), 2.15 – 2.07 (m, 4H), 1.97 – 1.89 (m, 2H), 1.65 (q, *J* = 7.4, 6.9 Hz, 2H), 1.59 (d, *J* = 5.6 Hz, 3H), 1.47 – 1.36 (m, 2H), 1.36 – 1.25 (m, 2H), 1.26 – 1.13 (m, 2H), 0.91 (dt, *J* = 14.3, 7.3 Hz, 6H), 0.36 (s, 6H).

<sup>13</sup>C NMR (101 MHz, CDCl<sub>3</sub>) δ 153.7, 141.5, 133.8, 131.4, 131.0, 128.5, 127.7, 124.9, 36.8, 34.2, 33.4, 32.9, 29.1, 24.7, 22.4, 18.0, 14.6, 14.5, 0.1.

<sup>29</sup>Si NMR (119 MHz, CDCl<sub>3</sub>) δ -11.2.

FTIR (cm<sup>-1</sup>): 2958, 2931, 2870, 1465, 1252, 849, 835, 750.

HRMS (FD) m/z, calcd for [C<sub>22</sub>H<sub>36</sub>Si]<sup>+</sup>: 328.2586; found: 328.2594.

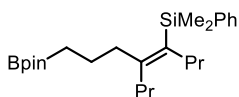

**21**

Chemical Formula: C<sub>25</sub>H<sub>43</sub>BO<sub>2</sub>Si

Exact Mass: 414.3125

Molecular Weight: 414.5120

**(21)** According to the general procedure C, (DrewPhos)<sub>2</sub>PdI<sub>2</sub> (78 mg, 0.05 mmol, 5 mol %), triethylamine (700 μL, 5 mmol, 5 equiv), dimethylphenylsilyl iodide (935 μL, 5 mmol, 5 equiv), and 4-octyne (146 μL, 1 mmol, 1 equiv) were combined under nitrogen. *No dioxane was added to the initial reaction mixture.* Alkylzinc iodide **S7** in dioxane ([1.1 M], 4.5 mL, 5 mmol, 5 equiv) was added over 4 h. The reaction was quenched with THF, stirred for 0.25 h, and worked up according to the general procedure. Palladium scavenger 1-pyrrolidinecarbodithioic acid ammonium salt was added to the drying organic solution. Analysis of the crude reaction mixture via gas chromatography revealed a >95:5 *syn:anti* ratio. The product was purified by silica gel chromatography (hexanes) followed by reverse phase column chromatography on a Biotage instrument using a SNAP Ultra C18 60 g column (1 : 3 to 0 : 1 water : acetonitrile) to afford **21** as a clear colorless oil (228 mg, 55%).

<sup>1</sup>H NMR (400 MHz, CDCl<sub>3</sub>) δ 7.52 – 7.47 (m, 2H), 7.29 (dd, J = 4.3, 2.1 Hz, 3H), 2.13 – 2.04 (m, 4H), 1.97 – 1.90 (m, 2H), 1.47 – 1.36 (m, 2H), 1.33 – 1.22 (m, 4H), 1.19 (s, 12H), 0.92 (t, J = 7.4 Hz, 3H), 0.86 (t, J = 7.3 Hz, 3H), 0.49 (t, J = 7.9 Hz, 2H), 0.35 (s, 6H).

<sup>13</sup>C NMR (151 MHz, CDCl<sub>3</sub>) δ 153.9, 141.4, 133.9, 130.8, 128.4, 127.6, 82.9, 39.7, 34.3, 33.3, 25.0, 24.9, 24.6, 23.6, 22.4, 14.6, 14.6, 0.2.

<sup>11</sup>B NMR (193 MHz, CDCl<sub>3</sub>) δ 34.2.

<sup>29</sup>Si NMR (119 MHz, CDCl<sub>3</sub>) δ -11.2.

FTIR (cm<sup>-1</sup>): 2956, 2930, 2870, 1372, 1318, 1248, 1146, 1109, 834, 815, 770, 728, 700.

HRMS (FD) m/z, calcd for [C<sub>25</sub>H<sub>43</sub>O<sub>2</sub>BSi]<sup>+</sup>: 414.3125 ; found: 414.3144.

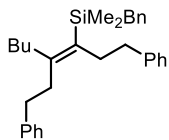

**22**

Chemical Formula: C<sub>31</sub>H<sub>40</sub>Si

Exact Mass: 440.2899

Molecular Weight: 440.7460

**(22)** According to the general procedure C, (DrewPhos)<sub>2</sub>PdI<sub>2</sub> (78 mg, 0.05 mmol, 5 mol %), dioxane (0.5 mL), triethylamine (700 μL, 5 mmol, 5 equiv), dimethylbenzylsilyl iodide (0.94 mL, 5 mmol, 5 equiv), and 4-octyne (146 μL, 1 mmol, 1 equiv) were combined under nitrogen. *n*-Butylzinc iodide **S3** in dioxane ([1.0 M], 5.0 mL, 5 mmol, 5 equiv) was added over 4 h. The reaction was quenched with THF, stirred for 0.25 h, and worked up according to the general procedure. Palladium scavenger 1-pyrrolidinecarbodithioic acid ammonium salt was added to the drying organic solution. Analysis of the crude reaction mixture via gas chromatography revealed a >95:5 *syn:anti* ratio. The product was purified by silica gel chromatography (hexanes) followed by reverse phase column chromatography on a Biotage instrument using a SNAP Ultra C18 60 g column (1 : 3 to 0 : 1 water : acetonitrile) to afford **22** as a colorless oil (238 mg, 54%).

<sup>1</sup>H NMR (400 MHz, CDCl<sub>3</sub>) δ 7.34 – 7.27 (m, 3H), 7.25 – 7.14 (m, 7H), 7.14 – 7.10 (m, 2H), 7.08 – 7.03 (m, 1H), 7.02 – 6.98 (m, 2H), 2.73 – 2.66 (m, 2H), 2.45 – 2.38 (m, 2H), 2.37 – 2.31 (m, 2H), 2.30 – 2.25 (m, 2H), 2.24 (s, 2H), 2.21 – 2.15 (m, 2H), 1.48 – 1.31 (m, 4H), 0.95 (t, J = 7.0 Hz, 3H), 0.17 (s, 6H).

<sup>13</sup>C NMR (101 MHz, CDCl<sub>3</sub>) δ 153.1, 142.6, 142.5, 140.5, 131.4, 128.5, 128.5, 128.5, 128.4, 128.3, 128.2, 126.0, 125.9, 124.1, 37.3, 36.8, 35.5, 34.3, 33.7, 31.8, 27.4, 23.4, 14.3, -0.6.

<sup>29</sup>Si NMR (119 MHz, CDCl<sub>3</sub>) δ -6.3.

FTIR (cm<sup>-1</sup>): 3024, 2955, 2929, 2871, 1600, 1493, 1453, 1248, 1205, 1154, 832, 761, 747, 698.

HRMS (LIFDI) m/z, calcd for [C<sub>31</sub>H<sub>40</sub>Si]<sup>+</sup>: 440.2899; found: 440.2904.

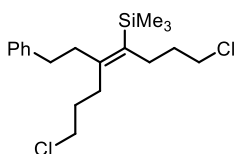

**23**

Chemical Formula: C<sub>19</sub>H<sub>30</sub>Cl<sub>2</sub>Si  
 Exact Mass: 356.1494  
 Molecular Weight: 357.4340

**(23)** According to the general procedure C, (DrewPhos)<sub>2</sub>PdI<sub>2</sub> (78 mg, 0.05 mmol, 5 mol %), dioxane (0.5 mL), triethylamine (700 μL, 5 mmol, 5 equiv), trimethylsilyl iodide (710 μL, 5 mmol, 5 equiv), and 1,8-dichloro-oct-4-yne (178 μL, 1 mmol, 1 equiv) were combined under nitrogen. Phenethylzinc iodide **S8** in dioxane ([1.2 M], 4.2 mL, 5 mmol, 5 equiv) was added over 4 h. The reaction was quenched with THF, stirred for 0.25 h, and worked up according to the general procedure. Palladium scavenger 1-pyrrolidinecarbodithioic acid ammonium salt was added to the drying organic solution. Analysis of the crude reaction mixture via gas chromatography revealed a >95:5 *syn:anti* ratio. The product was purified by silica gel chromatography (0 : 100 to 5 : 95 ethyl acetate : hexanes) followed by reverse phase column chromatography on a Biotage instrument using a SNAP Ultra C18 60 g column (3 : 17 water : acetonitrile) to afford **23** as a clear colorless oil (330 mg, 92%).

<sup>1</sup>H NMR (400 MHz, CDCl<sub>3</sub>) δ 7.33 – 7.27 (m, 2H), 7.20 (t, *J* = 6.6 Hz, 3H), 3.55 (dt, *J* = 12.7, 6.5 Hz, 4H), 2.72 – 2.64 (m, 2H), 2.48 – 2.39 (m, 2H), 2.38 – 2.31 (m, 2H), 2.28 – 2.21 (m, 2H), 1.90 (dt, *J* = 14.1, 6.5 Hz, 2H), 1.72 (dt, *J* = 14.5, 6.6 Hz, 2H), 0.15 (s, 9H).

<sup>13</sup>C NMR (101 MHz, CDCl<sub>3</sub>) δ 150.2, 142.0, 134.4, 128.6, 128.4, 126.1, 45.3, 45.2, 38.6, 35.8, 34.0, 32.1, 29.4, 28.6, 1.3.

<sup>29</sup>Si NMR (119 MHz, CDCl<sub>3</sub>) δ -7.1.

FTIR (cm<sup>-1</sup>): 3027, 2954, 1602, 1496, 1454, 1307, 1249, 836, 755, 699.

HRMS (LIFDI) *m/z*, calcd for [C<sub>19</sub>H<sub>30</sub>Cl<sub>2</sub>Si]<sup>+</sup>: 356.1494; found: 356.1477.

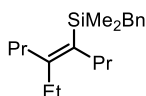

**24**

Chemical Formula: C<sub>19</sub>H<sub>32</sub>Si  
 Exact Mass: 288.2273  
 Molecular Weight: 288.5500

**(24)** According to the general procedure C, (JessePhos)<sub>2</sub>PdCl<sub>2</sub> (111 mg, 0.1 mmol, 5 mol %), dioxane (1 mL), triethylamine (1.4 mL, 10 mmol, 5 equiv), dimethylbenzylsilyl iodide (1.80 mL, 10 mmol, 5 equiv), and 4-octyne (293 μL, 2 mmol, 1 equiv) were combined under nitrogen. Ethylzinc iodide **S2** in dioxane ([1.6 M], 6.25 mL, 10 mmol, 5 equiv) was added over 4 h. The reaction was worked up according to the general procedure. Analysis of the crude reaction mixture via gas chromatography revealed a <5:95 *syn:anti* ratio. The product was purified by silica gel chromatography (hexanes) followed by reverse phase column chromatography on a Biotage instrument using a SNAP Ultra C18 60 g column (3 : 17 water : acetonitrile) to afford **24** as a colorless oil (532 mg, 92%).

<sup>1</sup>H NMR (600 MHz, CDCl<sub>3</sub>) δ 7.18 (t, *J* = 7.7 Hz, 2H), 7.08 – 7.02 (m, 1H), 7.02 – 6.97 (m, 2H), 2.19 (s, 2H), 2.11 (q, *J* = 7.5 Hz, 2H), 2.08 – 2.02 (m, 2H), 1.97 – 1.89 (m, 2H), 1.47 – 1.30 (m, 2H), 1.24 – 1.07 (m, 2H), 0.98 (t, *J* = 7.5 Hz, 3H), 0.91 (t, *J* = 7.3 Hz, 3H), 0.85 (t, *J* = 7.3 Hz, 3H), 0.08 (s, 6H).

<sup>13</sup>C NMR (151 MHz, CDCl<sub>3</sub>) δ 154.5, 140.8, 130.8, 128.4, 128.1, 123.9, 38.5, 34.1, 27.5, 24.5, 24.2, 22.7, 14.6, 14.5, 13.8, -0.8.

<sup>29</sup>Si NMR (119 MHz, CDCl<sub>3</sub>) δ -6.7.

FTIR (cm<sup>-1</sup>): 2959, 2930, 2871, 1600, 1493, 1453, 1249, 1206, 1154, 829, 761, 698, 477.

HRMS (ESI) *m/z*, calcd for [C<sub>16</sub>H<sub>27</sub>OSi]<sup>+</sup>: 288.2273; found: 288.2274.

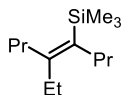

**25**

Chemical Formula: C<sub>13</sub>H<sub>28</sub>Si

Exact Mass: 212.1960

Molecular Weight: 212.4520

**(25)** According to the general procedure C, (JessePhos)<sub>2</sub>PdCl<sub>2</sub> (111 mg, 0.1 mmol, 5 mol %), dioxane (1 mL), triethylamine (1.4 mL, 10 mmol, 5 equiv), trimethylsilyl iodide (1.40 mL, 10 mmol, 5 equiv), and 4-octyne (293 μL, 2 mmol, 1 equiv) were combined under nitrogen. Ethylzinc iodide **S2** in dioxane ([1.6 M], 6.25 mL, 10 mmol, 5 equiv) was added over 4 h. The reaction was worked up according to the general procedure. Analysis of the crude reaction mixture via gas chromatography revealed an 8:92 *syn:anti* ratio. The product was purified by silica gel chromatography (hexanes) followed by reverse phase column chromatography on a Biotage instrument using a SNAP Ultra C18 60 g column (3 : 17 water : acetonitrile) to afford **25** as a clear colorless oil (318 mg, 75%).

<sup>1</sup>H NMR (600 MHz, CDCl<sub>3</sub>) δ 2.15 – 2.05 (m, 4H), 2.04 – 1.98 (m, 2H), 1.46 – 1.31 (m, 2H), 1.30 – 1.15 (m, 2H), 0.96 (t, *J* = 7.5 Hz, 3H), 0.90 (dt, *J* = 9.4, 7.3 Hz, 6H), 0.12 (s, 9H).

<sup>13</sup>C NMR (151 MHz, CDCl<sub>3</sub>) δ 153.4, 132.7, 38.5, 34.1, 24.6, 24.2, 22.8, 14.5, 14.4, 13.8, 1.4.

<sup>29</sup>Si NMR (119 MHz, CDCl<sub>3</sub>) δ -7.8.

FTIR (cm<sup>-1</sup>): 2960, 2931, 2872, 1599, 1465, 1248, 849, 834, 758.

HRMS (ESI) *m/z*, calcd for [C<sub>16</sub>H<sub>27</sub>OSi]<sup>+</sup>: 213.2033; found: 213.1842.

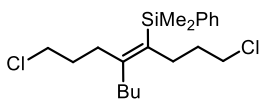

**26**

Chemical Formula: C<sub>20</sub>H<sub>32</sub>Cl<sub>2</sub>Si

Exact Mass: 370.1650

Molecular Weight: 371.4610

**(26)** According to the general procedure C, (JessePhos)<sub>2</sub>PdCl<sub>2</sub> (56 mg, 0.05 mmol, 5 mol %), dioxane (0.5 mL), Et<sub>3</sub>N (700 μL, 5 mmol, 5 equiv), Me<sub>2</sub>PhSiI (935 μL, 5 mmol, 5 equiv), and 1,8-dichloro-oct-4-yne (178 μL, 1 mmol, 1 equiv) were combined under nitrogen. *n*-Butylzinc iodide **S3** in dioxane ([2.0 M], 2.5 mL, 5 mmol, 5 equiv) was added over 4 h. The reaction was quenched with THF, stirred for 0.25 h, and worked up according to the general procedure. Analysis of the crude reaction mixture via gas chromatography revealed a 17:83 *syn:anti*

ratio. The product was purified by silica gel chromatography (0 : 100 to 5 : 95 ethyl acetate : hexanes) followed by reverse phase column chromatography on a Biotage instrument using a SNAP Ultra C18 60 g column (3 : 17 water : acetonitrile) to afford **26** as a clear colorless oil (221 mg, 60%).

<sup>1</sup>H NMR (400 MHz, CDCl<sub>3</sub>) δ 7.6 – 7.4 (m, 2H), 7.4 – 7.3 (m, 3H), 3.5 (t, *J* = 6.5 Hz, 2H), 3.1 (t, *J* = 6.8 Hz, 2H), 2.4 – 2.2 (m, 2H), 2.2 – 2.0 (m, 4H), 1.8 – 1.7 (m, 2H), 1.6 – 1.5 (m, 2H), 1.4 (td, *J* = 3.7, 1.9 Hz, 4H), 1.0 – 0.8 (m, 3H), 0.4 (s, 6H).

<sup>13</sup>C NMR (101 MHz, CDCl<sub>3</sub>) δ 153.5, 140.7, 133.7, 130.8, 128.9, 127.9, 45.3, 44.9, 34.4, 34.0, 32.0, 31.4, 31.1, 29.4, 23.2, 14.2, -0.1.

<sup>29</sup>Si NMR (119 MHz, CDCl<sub>3</sub>) δ -10.9.

FTIR (cm<sup>-1</sup>): 2956, 2871, 1595, 1457, 1428, 1305, 1250, 1109, 832, 814, 772, 730, 701.

HRMS (FD) *m/z*, calcd for [C<sub>19</sub>H<sub>30</sub>Cl<sub>2</sub>Si]<sup>+</sup>: 370.1650; found: 370.1639.

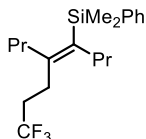

**27**

Chemical Formula: C<sub>19</sub>H<sub>29</sub>F<sub>3</sub>Si

Exact Mass: 342.1991

Molecular Weight: 342.5212

**(27)** According to the general procedure C, (JessePhos)<sub>2</sub>PdCl<sub>2</sub> (56 mg, 0.05 mmol, 5 mol %), dioxane (0.5 mL), triethylamine (700 μL, 5 mmol, 5 equiv), dimethylphenylsilyl iodide (940 μL, 5 mmol, 5 equiv), and 4-octyne (146 μL, 1 mmol, 1 equiv) were combined under nitrogen. 3,3,3-trifluoro zinc iodide **S9** in dioxane ([1.2M], 4.1 mL, 5 mmol, 5 equiv) was added over 4 h. The reaction was quenched with THF, stirred for 0.25 h, and worked up according to the general procedure. Analysis of the crude reaction mixture via gas chromatography revealed a <5:95 *syn:anti* ratio. The product was purified by silica gel chromatography (0 : 100 to 5 : 95 ethyl acetate : hexanes) followed by reverse phase column chromatography on a Biotage instrument using a SNAP Ultra C18 60 g column (1 : 3 to 0 : 1 water : acetonitrile) to afford **27** as a clear colorless oil (208 mg, 61%).

<sup>1</sup>H NMR (400 MHz, CDCl<sub>3</sub>) δ 7.50 – 7.45 (m, 2H), 7.32 (dd, *J* = 4.7, 1.9 Hz, 3H), 2.46 – 2.26 (m, 2H), 2.23 – 2.02 (m, 4H), 1.99 – 1.80 (m, 2H), 1.39 – 1.23 (m, 2H), 1.23 – 1.07 (m, 2H), 0.90 (t, *J* = 7.3 Hz, 3H), 0.63 (t, *J* = 7.3 Hz, 3H), 0.37 (s, 6H).

<sup>13</sup>C NMR (101 MHz, CDCl<sub>3</sub>) δ 149.4, 140.7, 133.7, 134.0, 128.7, 127.8, 127.1 (q, *J* = 276.9 Hz), 38.9, 34.2, 33.4 (q, *J* = 28.0 Hz), 24.5, 23.4 (q, *J* = 2.8 Hz), 22.2, 14.5, 14.0, -0.1.

<sup>29</sup>Si NMR (119 MHz, CDCl<sub>3</sub>) δ -10.7.

<sup>19</sup>F NMR (565 MHz, CDCl<sub>3</sub>) δ -66.9.

FTIR (cm<sup>-1</sup>): 2960, 2932, 2873, 1428, 1377, 1302, 1259, 1249, 1139, 1111, 1072, 978, 835, 813, 772, 729, 701.

HRMS (LIFDI) *m/z*, calcd for [C<sub>19</sub>H<sub>30</sub>Cl<sub>2</sub>Si]<sup>+</sup>: 342.199; found: 342.1983.

## 6. Synthesis of Tetrasubstituted Alkenes via Hiyama Cross-Coupling

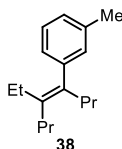

**38**

Chemical Formula: C<sub>17</sub>H<sub>26</sub>

Exact Mass: 230.2035

Molecular Weight: 230.3950

**(38)** A 25 mL Schlenk flask equipped with a magnetic stirbar and rubber septum was flame-dried, allowed to cool to room temperature under vacuum, and refilled with N<sub>2</sub>. The flask was briefly opened, charged with potassium trimethylsilylanolate (257 mg, 2 mmol, 2 equiv) and 18-crown-6 (528 mg, 2 mmol, 2 equiv) and the septum was replaced. The flask was evacuated and refilled with N<sub>2</sub> 3 times. THF (2 mL) and vinylsilane **16** (315 μL, 1 mmol, 1 equiv) were added by syringe. The reaction was stirred at 65 °C for 0.5 h. At this time, a solution of [(allyl)PdCl]<sub>2</sub> (9 mg, 0.025 mmol, 2.5 mol %), SPhos (21 mg, 0.05 mmol, 5 mol %), and 3-chlorotoluene (177 μL, 1.5 mmol, 1.5 equiv) in THF (2 mL) was added by syringe. The reaction was allowed to stir at 65 °C for 18 h. The reaction was then cooled to room temperature, opened to air, quenched with brine (5 mL), and diluted with Et<sub>2</sub>O (5 mL). The aqueous layer was extracted with Et<sub>2</sub>O (3 x 3 mL). The combined organic layers were washed with brine (10 mL), dried over MgSO<sub>4</sub>, filtered, and concentrated *in vacuo*. The crude material was purified via silica column chromatography (hexanes) to yield alkene **38** as a clear oil (142 mg, 62%).

<sup>1</sup>H NMR (600 MHz, CDCl<sub>3</sub>) δ 7.17 (t, *J* = 7.5 Hz, 1H), 7.01 (d, *J* = 7.5 Hz, 1H), 6.88 – 6.85 (m, 2H), 2.34 (s, 3H), 2.28 – 2.24 (m, 2H), 2.17 – 2.12 (m, 2H), 1.82 (q, *J* = 7.5 Hz, 2H), 1.47 (dq, *J* = 15.0, 7.4 Hz, 2H), 1.30 – 1.19 (m, 2H), 0.97 (t, *J* = 7.3 Hz, 3H), 0.85 (q, *J* = 7.3 Hz, 6H).

<sup>13</sup>C NMR (101 MHz, CDCl<sub>3</sub>) δ 144.3, 137.3, 137.2, 136.0, 129.6, 127.7, 126.5, 126.1, 36.4, 32.6, 25.9, 22.4, 21.7, 14.6, 14.2, 13.9.

FTIR (cm<sup>-1</sup>): 2961, 2932, 2871, 1463, 1377, 1053, 784, 715.

HRMS (ESI) *m/z*, calcd for [C<sub>19</sub>H<sub>30</sub>Cl<sub>2</sub>Si]<sup>+</sup>: 230.2035; found: 230.2035.

## 7. Additional Optimization Data

Note: All reactions in this section were performed on a 0.25 mmol scale in a nitrogen filled glovebox.

### Examination of Addition of Reagents in the Multicomponent Carbosilylation Reaction of Diaryl Alkynes:

In a nitrogen filled glovebox, a 1-dram vial equipped with a magnetic stirbar was charged with [Pd] (2 mol %), diphenylacetylene (1 equiv), dioxane (125  $\mu$ L), diethylzinc (1 equiv) and silyl-iodide (1 equiv). The vial was sealed with a septum cap and removed from the glovebox. The reaction was quenched with diethyl ether (1 mL) and water (1 mL) via syringe. 1,3,5-trimethoxybenzene (TMB) (0.33 equiv) and nonane (1 equiv) were added as an NMR standard and a GC standard, respectively. An aliquot of the organic layer was then filtered through  $MgSO_4$  and silica gel for NMR and GC analysis.

**Table S1: Examination of Order of Addition and Slow Addition:**

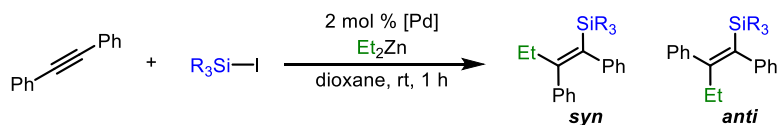

| Entry | [Pd] Source                                        | Silyl Iodide (equiv)      | Nucleophile (equiv)    | Et <sub>3</sub> N (equiv) | Conditions                                     | Yield <sup>a</sup> | syn:anti <sup>b</sup> |
|-------|----------------------------------------------------|---------------------------|------------------------|---------------------------|------------------------------------------------|--------------------|-----------------------|
| 1     | None                                               | TMSI (1)                  | Et <sub>2</sub> Zn (1) | 0                         | TMSI added last, over 0.5 min                  | trace              | >95:5                 |
| 2     | None                                               | PhMe <sub>2</sub> Sil (1) | Et <sub>2</sub> Zn (1) | 0                         | PhMe <sub>2</sub> Sil added last, over 0.5 min | <1                 | >95:5                 |
| 3     | (Ph <sub>3</sub> P) <sub>4</sub> Pd                | TMSI (1)                  | Et <sub>2</sub> Zn (1) | 0                         | TMSI added last, over 0.5 min                  | 6                  | >95:5                 |
| 4     | (Ph <sub>3</sub> P) <sub>4</sub> Pd                | TMSI (1)                  | Et <sub>2</sub> Zn (1) | 0                         | Et <sub>2</sub> Zn added last, over 0.5 min    | 5                  | >95:5                 |
| 5     | (Ph <sub>3</sub> P) <sub>4</sub> Pd                | PhMe <sub>2</sub> Sil (1) | Et <sub>2</sub> Zn (1) | 0                         | Et <sub>2</sub> Zn added last, over 0.5 min    | 6                  | >95:5                 |
| 6     | (Ph <sub>3</sub> P) <sub>4</sub> Pd                | PhMe <sub>2</sub> Sil (1) | Et <sub>2</sub> Zn (1) | 0                         | Et <sub>2</sub> Zn added last, over 1h         | 25                 | >95:5                 |
| 7     | (Ph <sub>3</sub> P) <sub>2</sub> PdCl <sub>2</sub> | PhMe <sub>2</sub> Sil (1) | Et <sub>2</sub> Zn (1) | 0                         | Et <sub>2</sub> Zn added last, over 1h         | 70                 | >95:5                 |
| 8     | (Ph <sub>3</sub> P) <sub>2</sub> PdCl <sub>2</sub> | PhMe <sub>2</sub> Sil (1) | Et <sub>2</sub> Zn (1) | 0                         | Et <sub>2</sub> Zn added last, over 4 h        | 89                 | >95:5                 |
| 9     | (Ph <sub>3</sub> P) <sub>2</sub> PdCl <sub>2</sub> | PhMe <sub>2</sub> Sil (1) | EtZnI (1)              | 1                         | EtZnI added last, over 4h                      | 89                 | >95:5                 |
| 10    | (Ph <sub>3</sub> P) <sub>2</sub> PdCl <sub>2</sub> | PhMe <sub>2</sub> Sil (1) | BuZnI (1)              | 1                         | BuZnI added last, over 4h                      | 95                 | >95:5                 |
| 11    | (Ph <sub>3</sub> P) <sub>2</sub> PdCl <sub>2</sub> | PhMe <sub>2</sub> Sil (3) | EtZnI (1.5)            | 3                         | EtZnI added last, over 4h                      | 95                 | >95:5                 |

|    |                                                    |                           |             |   |                               |    |       |
|----|----------------------------------------------------|---------------------------|-------------|---|-------------------------------|----|-------|
| 12 | (Ph <sub>3</sub> P) <sub>2</sub> PdCl <sub>2</sub> | PhMe <sub>2</sub> SiI (3) | BuZnI (1.5) | 3 | BuZnI added last,<br>over 4 h | 96 | >95:5 |
|----|----------------------------------------------------|---------------------------|-------------|---|-------------------------------|----|-------|

<sup>a</sup>Yields obtained by <sup>1</sup>H NMR with TMB as an internal standard. <sup>b</sup>Ratio determined by GC.

### Examination of Ligands in the Multicomponent Carbosilylation Reaction of Dialkyl Alkynes:

In a nitrogen filled glovebox, a 1-dram vial equipped with a magnetic stirbar was charged with Pd<sub>2</sub>(dba)<sub>3</sub>·CHCl<sub>3</sub> (2.5 mol %), ligand (10 mol %), dioxane (125 uL), triethylamine (3 equiv), 4-octyne (1 equiv), and dimethylphenylsilyl iodide (1 equiv). The vial was sealed with a septum cap and removed from the glovebox. A solution of ethylzinc iodide (1.0 equiv) in dioxane was then added dropwise over 4 h via syringe pump, with stirring. The reaction was quenched with diethyl ether (1 mL) and water (1 mL) via syringe. 1,3,5-trimethoxybenzene (TMB) (0.33 equiv) and nonane (1 equiv) were added as an NMR standard and a GC standard, respectively. An aliquot of the organic layer was then filtered through MgSO<sub>4</sub> and silica gel for NMR and GC analysis.

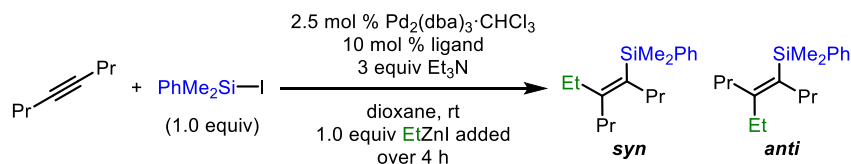

| Entry | Ligand                                                              | Yield <sup>a</sup> | syn:anti <sup>b</sup> |
|-------|---------------------------------------------------------------------|--------------------|-----------------------|
| 1     | Ph <sub>3</sub> P                                                   | 88                 | 65:35                 |
| 2     | (3,5-CF <sub>3</sub> C <sub>6</sub> H <sub>3</sub> ) <sub>3</sub> P | 13                 | 50:50                 |
| 3     | (4-MeOC <sub>6</sub> H <sub>4</sub> ) <sub>3</sub> P                | 66                 | 60:40                 |
| 4     | DrewPhos                                                            | 76                 | 90:10                 |
| 5     | ( <i>o</i> -tol) <sub>3</sub> P                                     | 65                 | 18:82                 |
| 6     | Ph <sub>2</sub> P <sup>t</sup> Bu                                   | 60                 | 3:97                  |
| 7     | JessePhos                                                           | 67                 | 5:95                  |

<sup>a</sup>Yields obtained by <sup>1</sup>H NMR with TMB as an internal standard. <sup>b</sup>Ratio determined by GC.

### Further Optimization of Conditions for the Multicomponent Carbosilylation Reaction of Dialkyl Alkynes:

In a nitrogen filled glovebox, a 1-dram vial equipped with a magnetic stirbar was charged with palladium precatalyst, dioxane (125 uL), triethylamine, 4-octyne (1 equiv), and dimethylphenylsilyl iodide. The vial was sealed with a septum cap and removed from the glovebox. A solution of ethylzinc iodide in dioxane was then added dropwise over 4 h via syringe pump, with stirring. The reaction was quenched with diethyl ether (1 mL) and water (1 mL) via syringe. 1,3,5-trimethoxybenzene (TMB) (0.33 equiv) and nonane (1 equiv) were added as an NMR standard and a GC standard, respectively. An aliquot of the organic layer was then filtered through MgSO<sub>4</sub> and silica gel for NMR and GC analysis.

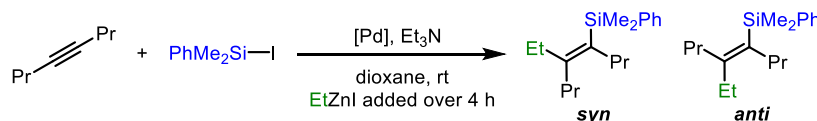

| Entry | [Pd] (mol %)                                           | Me <sub>2</sub> PhSi (equiv) | Et <sub>3</sub> N (equiv) | EtZnI (equiv) | Yield (%) <sup>a</sup> | syn:anti <sup>b</sup> |
|-------|--------------------------------------------------------|------------------------------|---------------------------|---------------|------------------------|-----------------------|
| 1     | (DrewPhos) <sub>2</sub> PdI <sub>2</sub><br>(2 mol %)  | 3                            | 3                         | 1.5           | 53                     | >95:5                 |
| 2     | (DrewPhos) <sub>2</sub> PdI <sub>2</sub><br>(5 mol %)  | 3                            | 3                         | 1.5           | 60                     | >95:5                 |
| 3     | (DrewPhos) <sub>2</sub> PdI <sub>2</sub><br>(5 mol %)  | 5                            | 5                         | 1.5           | 65                     | >95:5                 |
| 4     | (DrewPhos) <sub>2</sub> PdI <sub>2</sub><br>(5 mol %)  | 5                            | 5                         | 2             | 74                     | >95:5                 |
| 5     | (DrewPhos) <sub>2</sub> PdI <sub>2</sub><br>(5 mol %)  | 5                            | 5                         | 5             | 99                     | >95:5                 |
| 6     | (JessePhos) <sub>2</sub> PdI <sub>2</sub><br>(5 mol %) | 5                            | 5                         | 5             | 94                     | <5:95                 |

<sup>a</sup>Yields obtained by <sup>1</sup>H NMR with TMB as an internal standard. <sup>b</sup>Ratio determined by GC.

## 8. Examination of Silicon Substitution

In a nitrogen filled glovebox, a 1-dram vial equipped with a magnetic stirbar was charged with (Ph<sub>3</sub>P)<sub>2</sub>PdCl<sub>2</sub> (3.5 mg, 0.005 mmol, 2 mol %), 1,2-bis(4-methoxyphenyl)acetylene (59 mg, 0.25 mmol, 1 equiv), dioxane (125 μL), and silyl-iodide (0.75 mmol, 3 equiv). The vial was sealed with a septum cap and removed from the glovebox. Alkylzinc iodide **S7** (0.6M, 0.68 mL, 0.38 mmol, 1.5 equiv) was added over 4 h via syringe pump. The reaction was quenched with diethyl ether (1 mL) and water (1 mL) via syringe. 1,3,5-trimethoxybenzene (TMB) (14 mg, 0.33 equiv) and nonane (32 mg, 1 equiv) were added as an NMR standard and a GC standard, respectively. An aliquot of the organic layer was then filtered through MgSO<sub>4</sub> and silica gel for NMR and GC analysis.

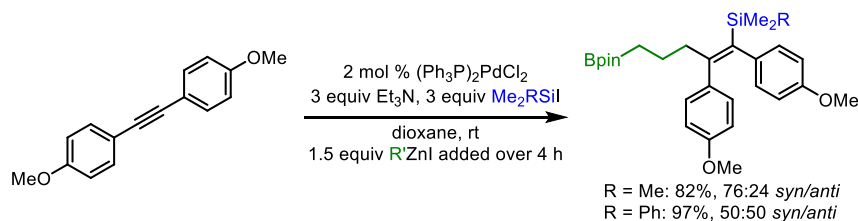

## 9. References

- (1) Pangborn, A. B.; Giardello, M. A.; Grubbs, R. H.; Rosen, R. K.; Timmers, F. J. *Organometallics* **1996**, *15*, 1518.
- (2) McAtee, J. R.; Krause, S. B.; Watson, D. A. *Adv. Synth. Catal.* **2015**, *357*, 2317.
- (3) Cinderella, A. P.; Vulovic, B.; Watson, D. A. *J. Am. Chem. Soc.* **2017**, *139*, 7741.
- (4) McAtee, J. R.; Yap, G. P. A.; Watson, D. A. *J. Am. Chem. Soc.* **2014**, *136*, 10166.
- (5) Reid, W. B.; Spillane, J. J.; Krause, S. B.; Watson, D. A. *J. Am. Chem. Soc.* **2016**, *138*, 5539.
- (6) Pan Y.; Young, G. B.; *J. Organomet. Chem.* **1999**, *577*, 257.
- (7) Clarke, M. L.; Elleis, D.; Mason, K. L.; Orpen, A. G.; Pringle, P. G.; Wingad, R. L.; Zaher, D. A.;



- 
- Barker, R. T. *Dalton Trans.*, **2005**, 1294.
- (8) Adachi, Y.; Kamei, N.; Yokoshima, S.; Fukuyama, T. *Org. Lett.* **2011**, *13*, 4446.
- (9) Levin, V. V.; Zemtsov, A. A.; Struchkova, M. I.; Dilman A. D. *Org Lett.* **2013**, *15*, 917.
- (10) Hoang, C. T.; Alezra, V.; Guillot, R.; Kouklovsky, C. *Org. Lett.* **2007**, *9*, 2521.
- (11) Guo, W.; Pleixats, R.; Shafir, A.; Parella T. *Adv. Synth. Catal.*, **2015**, *357*, 89.
- (12) Tang, Q.; Xia, D.; Jin, X.; Zhang, Q.; Sun, X.-Q.; Wang, C. *J. Amer. Chem. Soc.* **2013**, *135*, 4628.
- (13) Mio, M. J.; Kopel, L. C.; Braun, J. B.; Gadzikwa, T. L.; Hull, K. L.; Brisbois, R. G.; Markworth, C. J.; Grieco, P. A. *Org. Lett.* **2002**, *4*, 3199.

## 10. Spectral Data

7.82  
7.66  
7.65  
7.52  
7.50  
7.48  
6.77  
6.78

| Parameter                | Value                 |
|--------------------------|-----------------------|
| 1 Title                  | MFW02190-benzo1.3.fid |
| 2 Solvent                | CDCl3                 |
| 3 Temperature            | 298.2                 |
| 4 Number of Scans        | 16                    |
| 5 Receiver Gain          | 11.3                  |
| 6 Relaxation Delay       | 1.0000                |
| 7 Pulse Width            | 15.0000               |
| 8 Spectrometer Frequency | 400.13                |
| 9 Nucleus                | <sup>1</sup> H        |

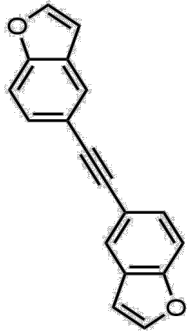

**S1**

Chemical Formula: C<sub>18</sub>H<sub>10</sub>O<sub>2</sub>  
 Exact Mass: 258.0681  
 Molecular Weight: 258.2760

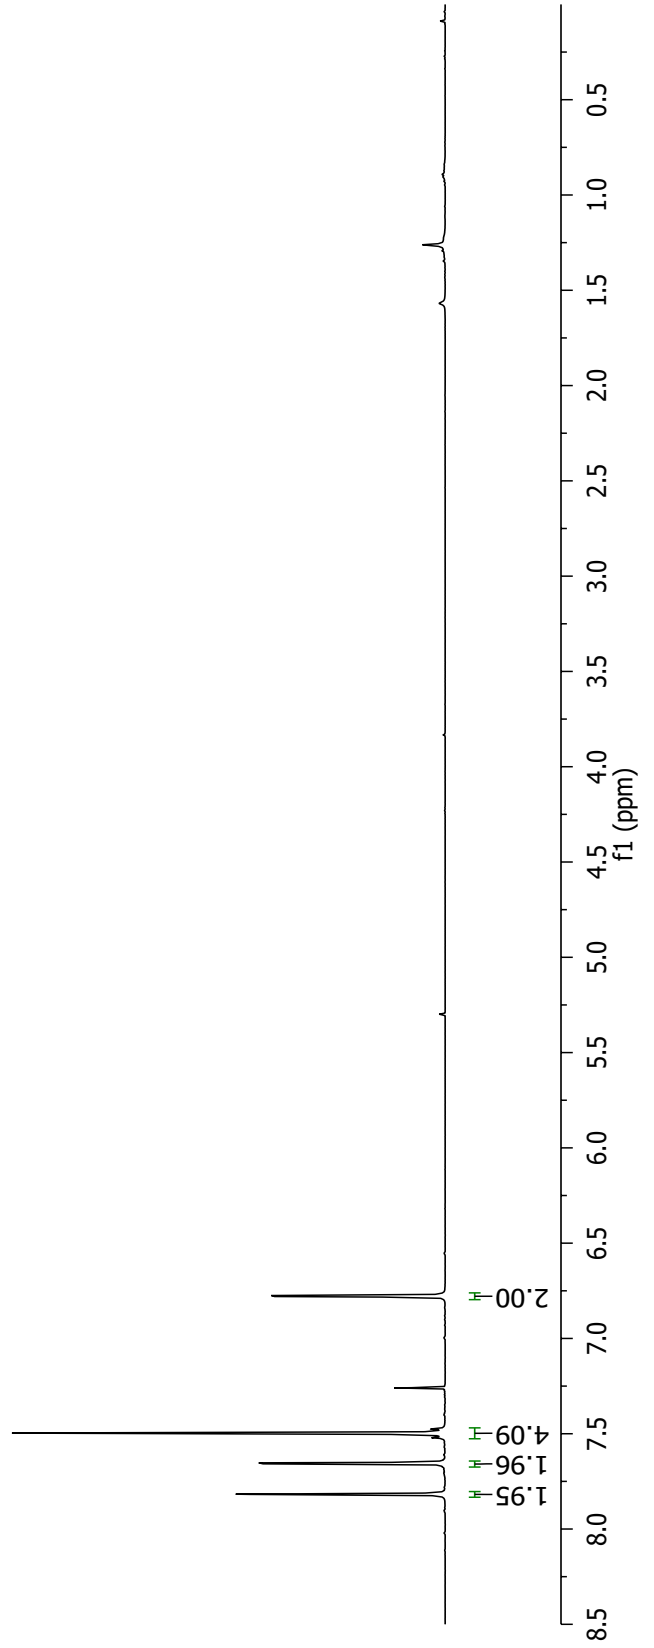

154.61  
145.94  
128.12  
127.71  
124.75  
118.09  
111.68  
106.64  
88.40

| Parameter                | Value                 |
|--------------------------|-----------------------|
| 1 Title                  | MFW02190-benzo1.4.fid |
| 2 Solvent                | CDCl3                 |
| 3 Temperature            | 298.2                 |
| 4 Number of Scans        | 32                    |
| 5 Receiver Gain          | 512.0                 |
| 6 Relaxation Delay       | 3.0000                |
| 7 Pulse Width            | 10.7000               |
| 8 Spectrometer Frequency | 100.62                |
| 9 Nucleus                | 13C                   |

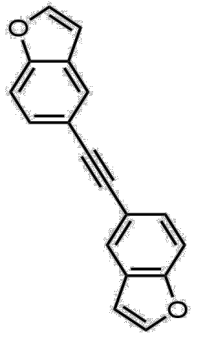

**S1**

Chemical Formula: C<sub>18</sub>H<sub>10</sub>O<sub>2</sub>  
 Exact Mass: 258.0681  
 Molecular Weight: 258.2760

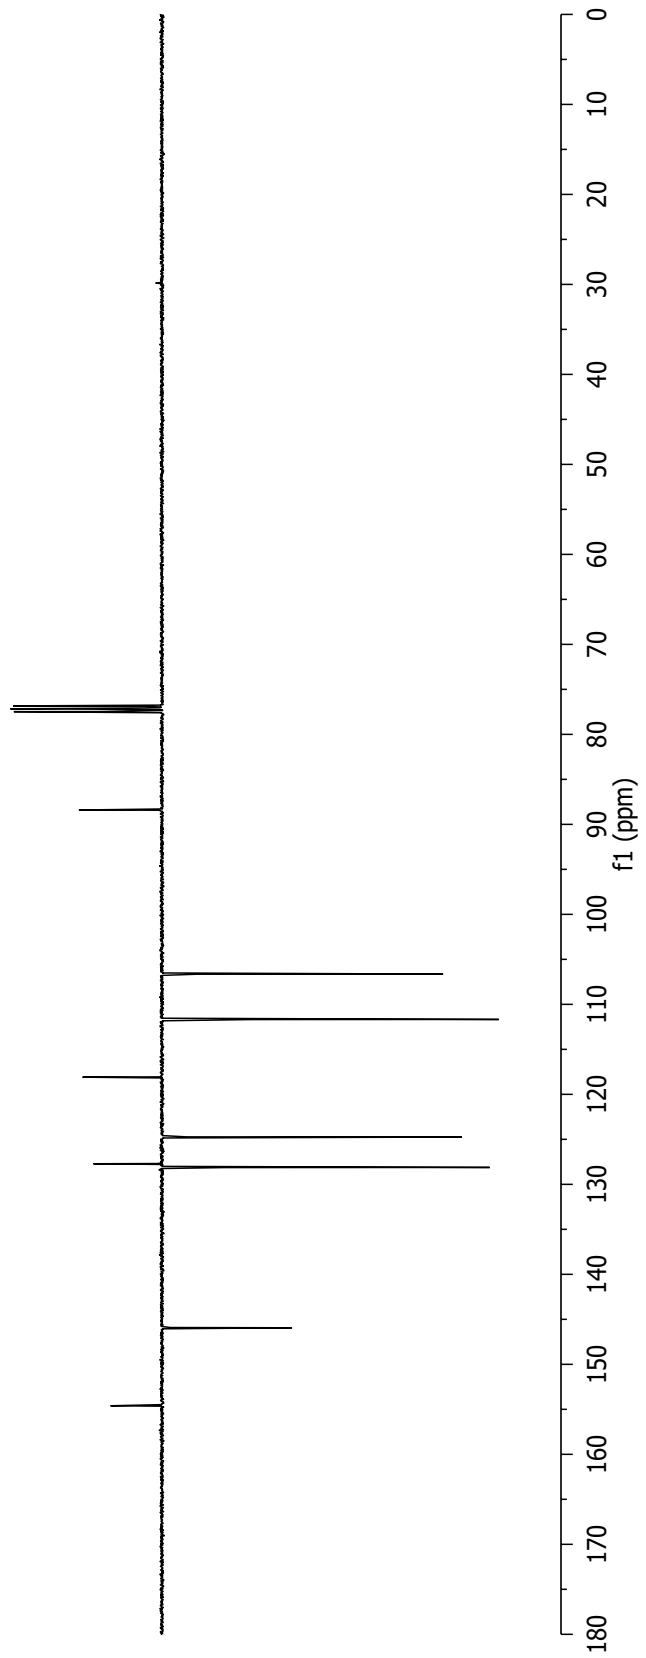

7.69  
7.68  
7.40  
7.39  
7.39  
7.06  
7.05  
7.03  
7.02  
6.99  
6.99  
6.98  
6.97  
6.94  
6.92  
6.92  
6.90  
6.82  
6.81

| Parameter                | Value           |
|--------------------------|-----------------|
| 1 Title                  | SBK03243B.1.fid |
| 2 Solvent                | CDCl3           |
| 3 Temperature            | 298.0           |
| 4 Number of Scans        | 16              |
| 5 Receiver Gain          | 114.0           |
| 6 Relaxation Delay       | 1.0000          |
| 7 Pulse Width            | 10.5000         |
| 8 Spectrometer Frequency | 600.32          |
| 9 Nucleus                | <sup>1</sup> H  |

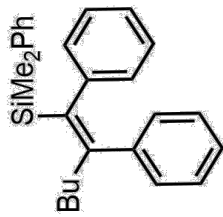

**2**

Chemical Formula: C<sub>26</sub>H<sub>30</sub>Si  
 Exact Mass: 370.2117  
 Molecular Weight: 370.6110

2.44  
2.43  
2.41

1.06  
1.05  
1.04  
1.02  
1.01  
1.00  
0.99  
0.98  
0.66  
0.65  
0.63  
0.28

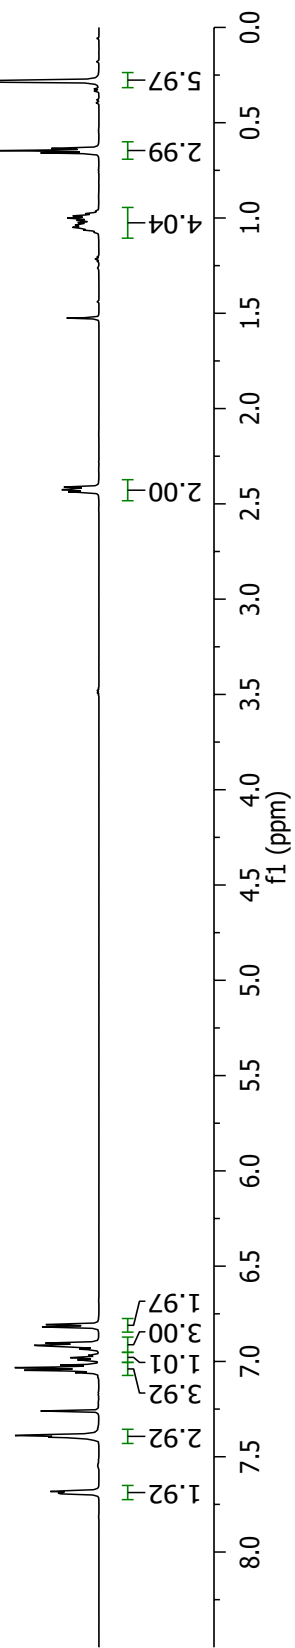

156.17  
144.60  
143.16  
140.29  
138.21  
133.91  
129.38  
128.90  
128.81  
127.96  
127.41  
127.31  
125.80  
124.59

| Parameter                | Value           |
|--------------------------|-----------------|
| 1 Title                  | SBK03243B.3.fid |
| 2 Solvent                | CDCl3           |
| 3 Temperature            | 298.0           |
| 4 Number of Scans        | 1024            |
| 5 Receiver Gain          | 2050.0          |
| 6 Relaxation Delay       | 5.0000          |
| 7 Pulse Width            | 10.6300         |
| 8 Spectrometer Frequency | 150.97          |
| 9 Nucleus                | <sup>13</sup> C |

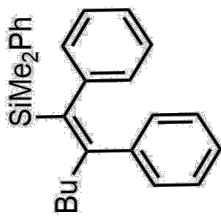

**2**

Chemical Formula: C<sub>26</sub>H<sub>30</sub>Si  
 Exact Mass: 370.2117  
 Molecular Weight: 370.6110

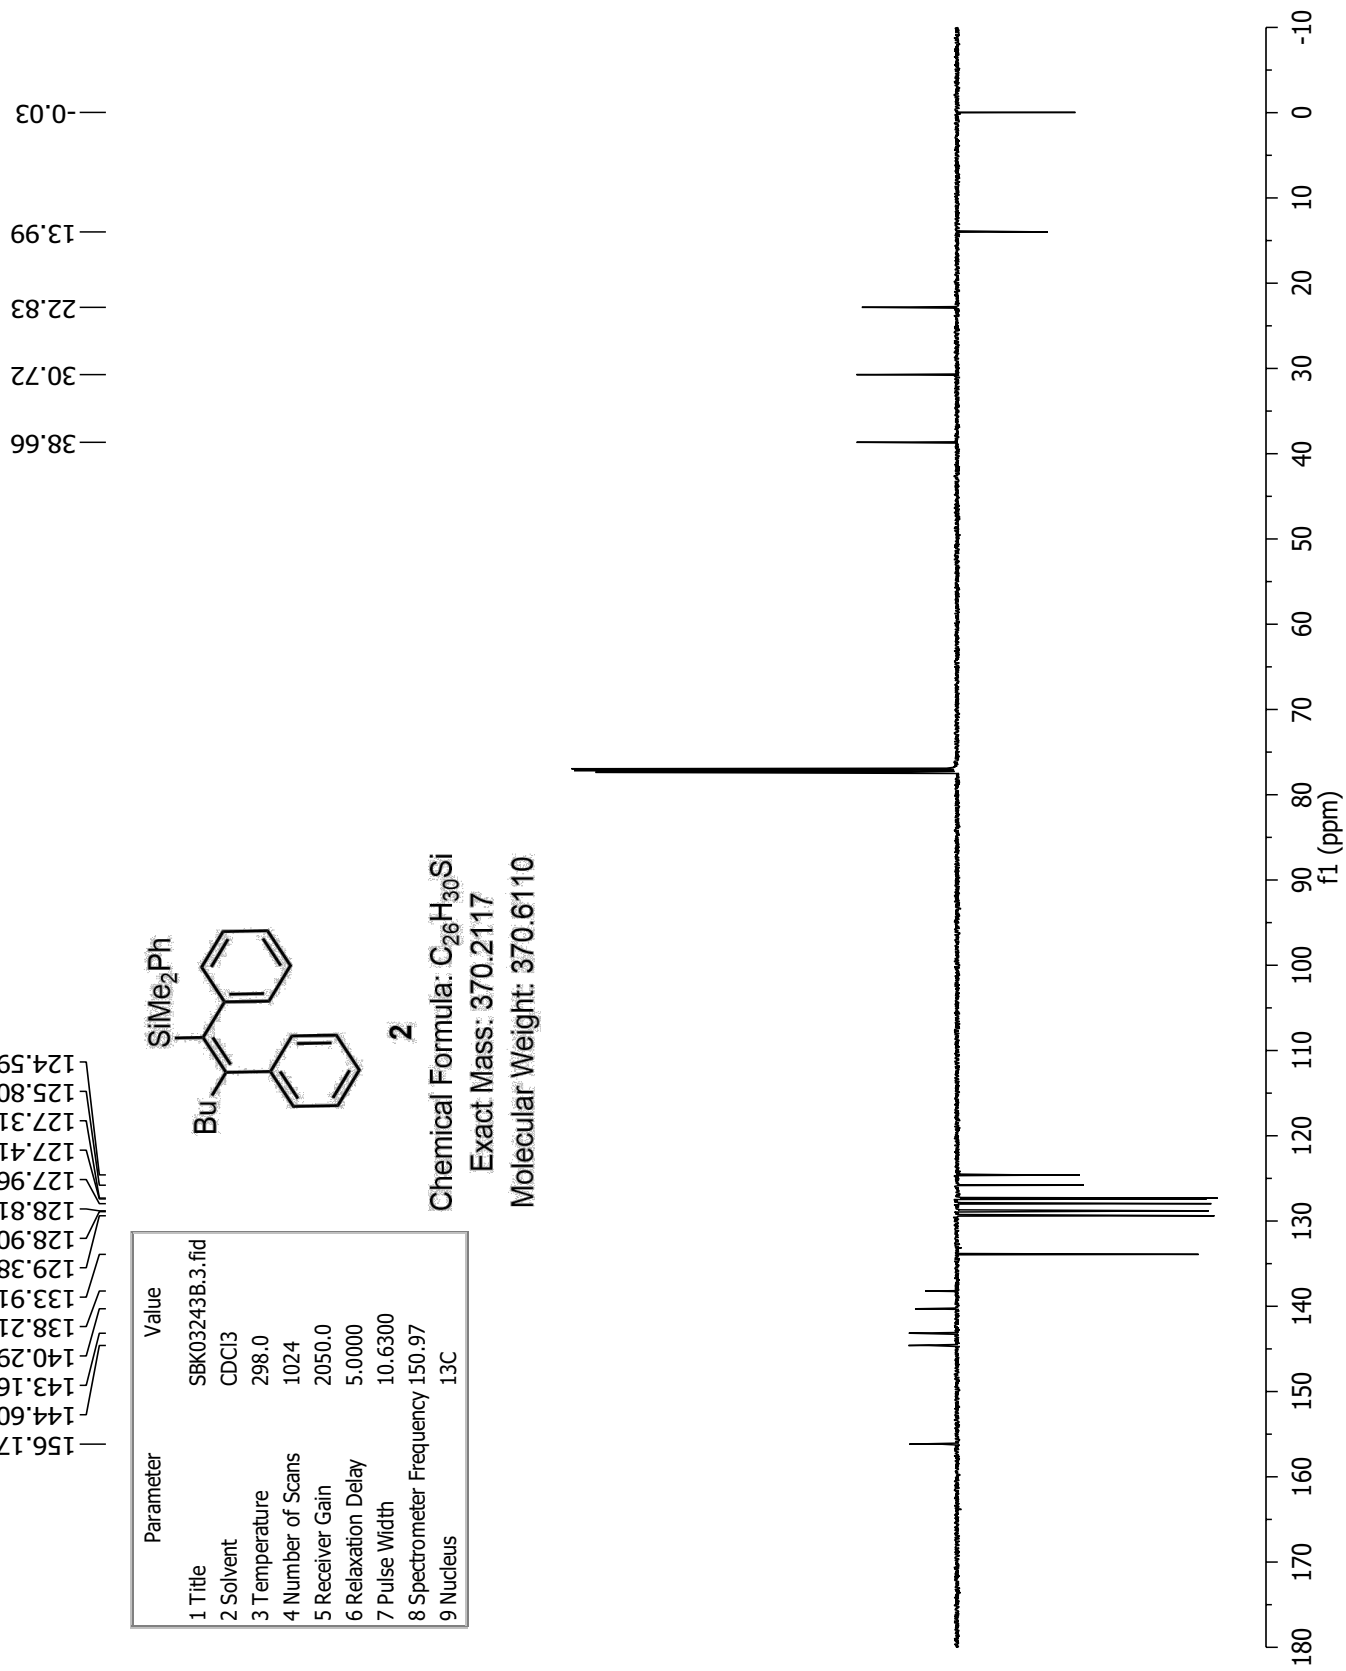

-11.63

| Parameter                | Value           |
|--------------------------|-----------------|
| 1 Title                  | SBK03243B.2.fid |
| 2 Solvent                | CDCl3           |
| 3 Temperature            | 298.0           |
| 4 Number of Scans        | 256             |
| 5 Receiver Gain          | 1030.0          |
| 6 Relaxation Delay       | 12.5000         |
| 7 Pulse Width            | 13.5000         |
| 8 Spectrometer Frequency | 119.26          |
| 9 Nucleus                | 29Si            |

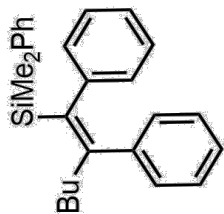

2

Chemical Formula:  $C_{26}H_{30}Si$   
Exact Mass: 370.2117  
Molecular Weight: 370.6110

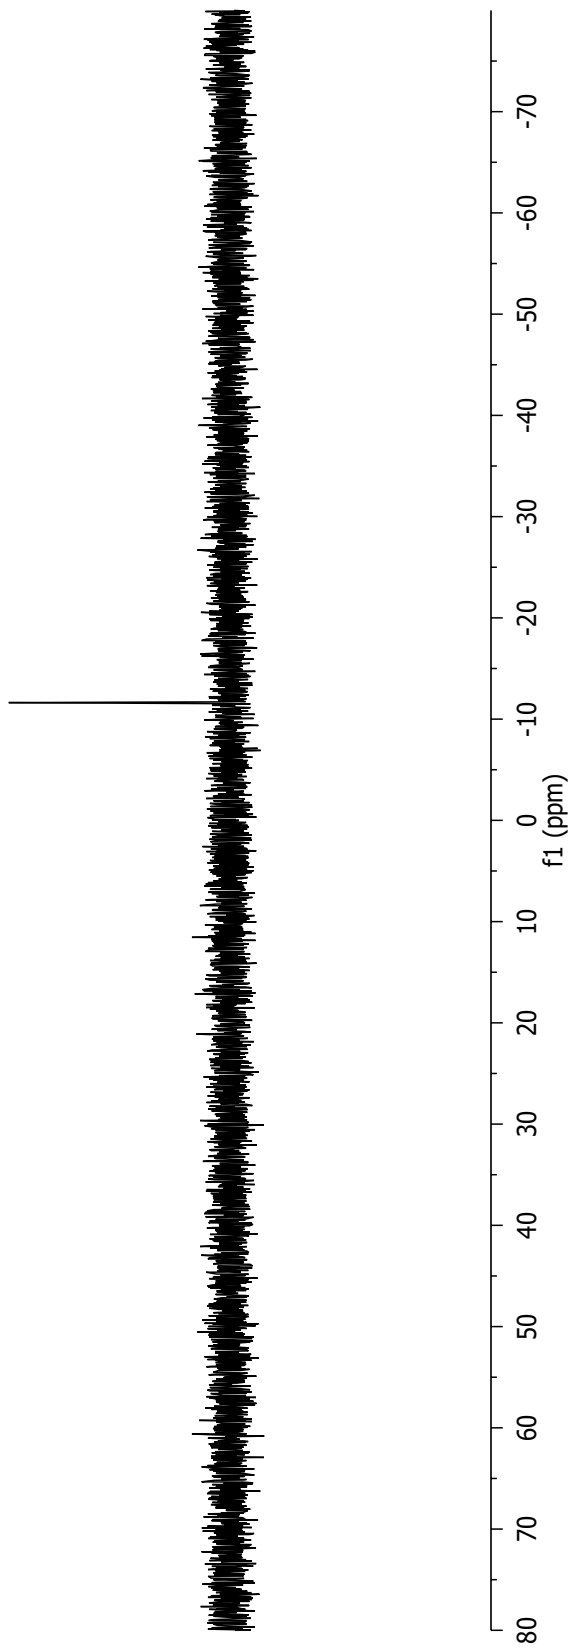

7.28  
7.27  
7.25  
7.23  
7.22  
7.20  
6.97  
6.96  
6.88  
6.87  
6.83  
6.81  
6.73  
6.71

| Parameter                | Value           |
|--------------------------|-----------------|
| 1 Title                  | SBK03253B.1.fid |
| 2 Solvent                | CDCl3           |
| 3 Temperature            | 300.0           |
| 4 Number of Scans        | 16              |
| 5 Receiver Gain          | 144.0           |
| 6 Relaxation Delay       | 1.0000          |
| 7 Pulse Width            | 10.5000         |
| 8 Spectrometer Frequency | 600.32          |
| 9 Nucleus                | <sup>1</sup> H  |

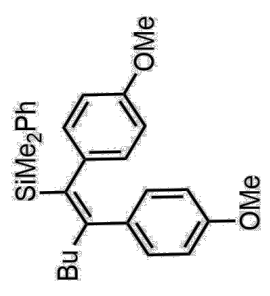

**3**

Chemical Formula: C<sub>28</sub>H<sub>34</sub>O<sub>2</sub>Si  
 Exact Mass: 430.2328  
 Molecular Weight: 430.6630

2.13  
2.12  
2.11  
1.10  
1.09  
1.07  
1.06  
1.03  
1.02  
1.01  
0.65  
0.64  
0.63

3.81  
3.80

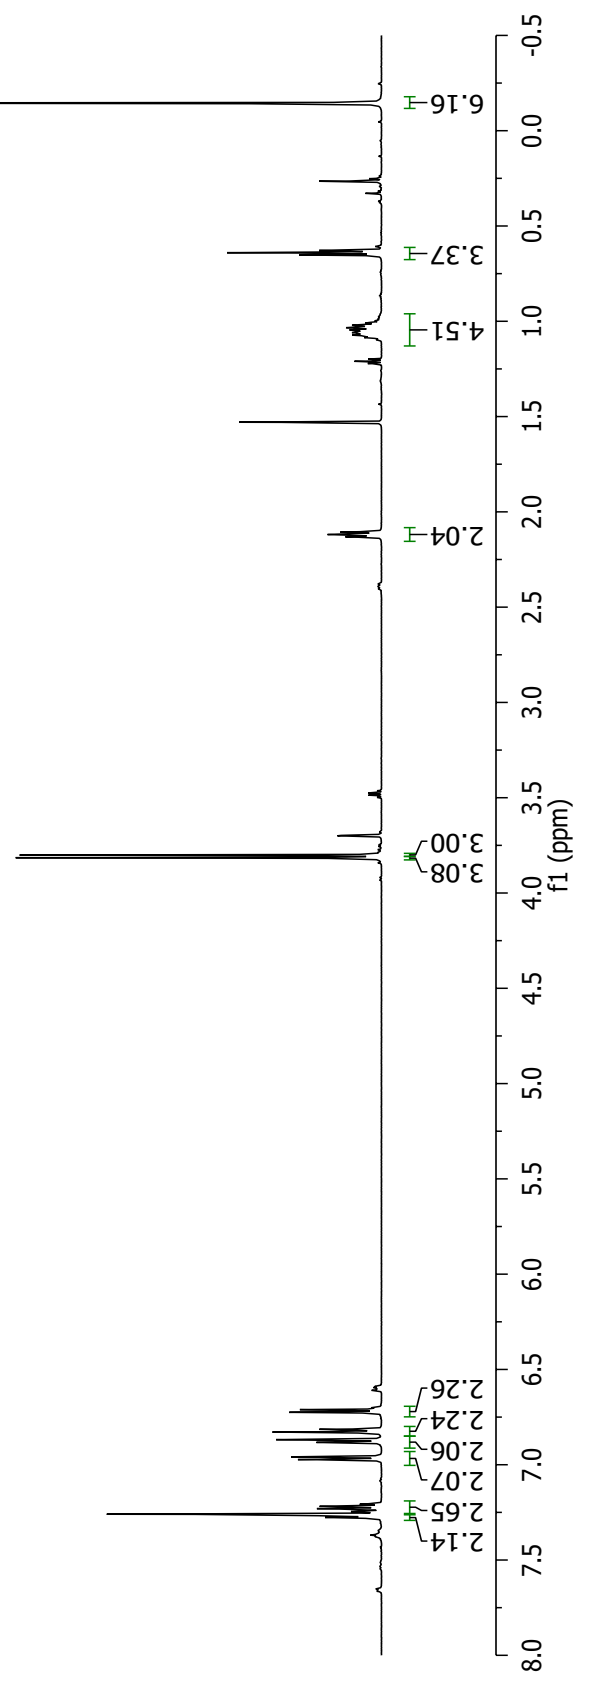

158.63  
157.40  
156.14  
140.60  
139.27  
136.80  
136.47  
133.96  
130.08  
129.71  
128.29  
127.37  
113.38  
113.11  
55.36  
55.34  
37.09  
30.45  
22.63  
14.00  
-0.81

| Parameter                | Value              |
|--------------------------|--------------------|
| 1 Title                  | SBK03253B-Si.2.fid |
| 2 Solvent                | CDCl3              |
| 3 Temperature            | 300.0              |
| 4 Number of Scans        | 1024               |
| 5 Receiver Gain          | 2050.0             |
| 6 Relaxation Delay       | 5.0000             |
| 7 Pulse Width            | 10.6300            |
| 8 Spectrometer Frequency | 150.97             |
| 9 Nucleus                | <sup>13</sup> C    |

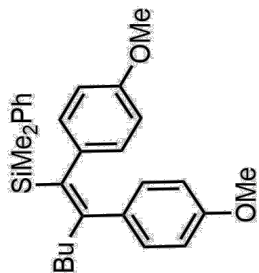

**3**

Chemical Formula: C<sub>28</sub>H<sub>34</sub>O<sub>2</sub>Si  
 Exact Mass: 430.2328  
 Molecular Weight: 430.6630

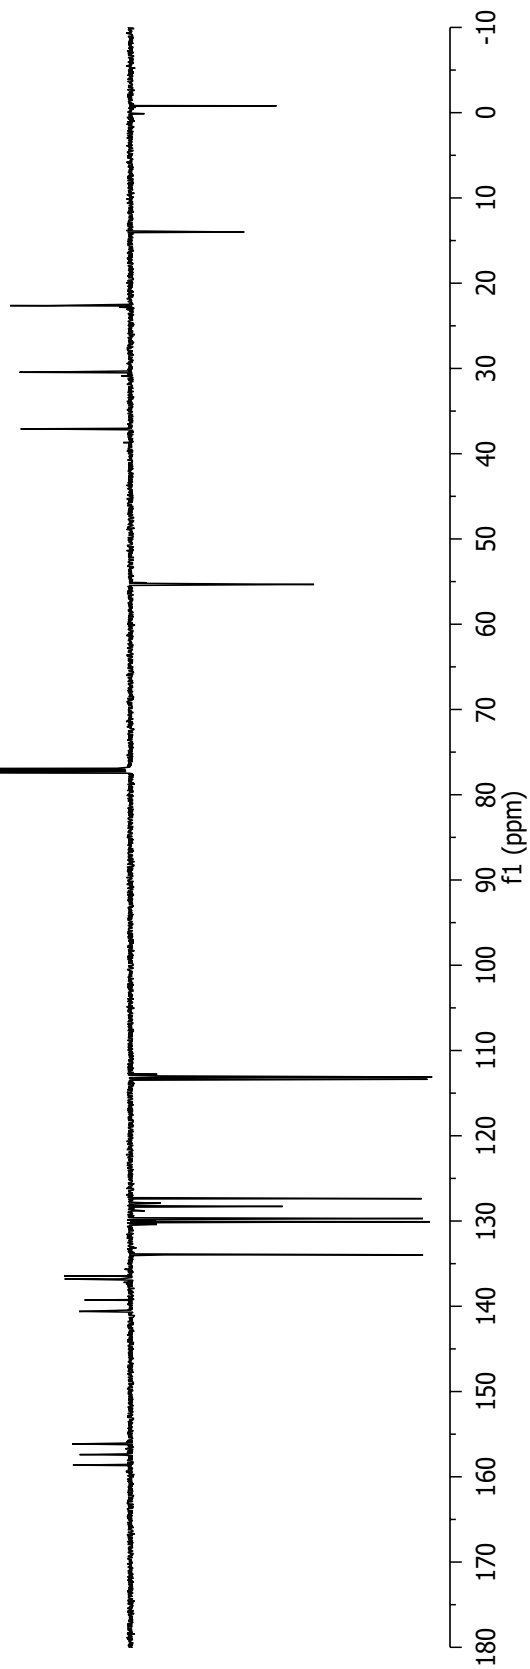



-12.68

| Parameter                | Value              |
|--------------------------|--------------------|
| 1 Title                  | SBK03253B-Si.1.fid |
| 2 Solvent                | CDCl3              |
| 3 Temperature            | 300.0              |
| 4 Number of Scans        | 256                |
| 5 Receiver Gain          | 2050.0             |
| 6 Relaxation Delay       | 12.5000            |
| 7 Pulse Width            | 13.5000            |
| 8 Spectrometer Frequency | 119.26             |
| 9 Nucleus                | 29Si               |

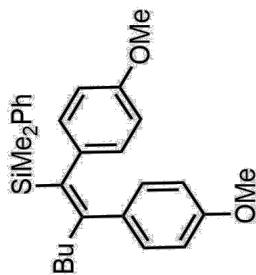

**3**

Chemical Formula: C<sub>28</sub>H<sub>34</sub>O<sub>2</sub>Si  
Exact Mass: 430.2328  
Molecular Weight: 430.6630

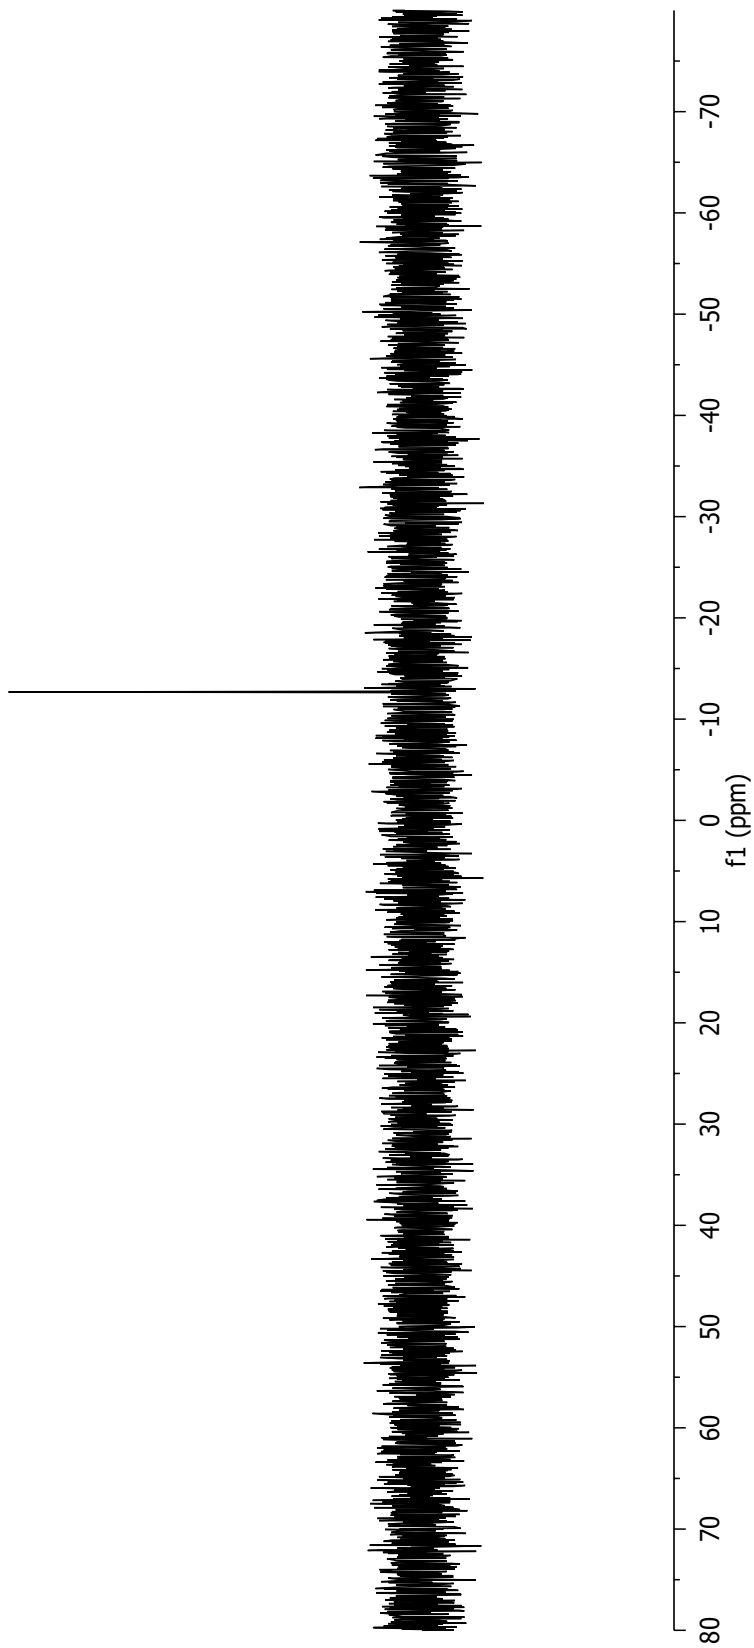

7.73  
7.72  
7.72  
7.71  
7.49  
7.48  
7.48  
7.48  
7.41  
7.40  
7.39  
7.38  
7.08  
7.07  
6.98  
6.97

| Parameter                | Value           |
|--------------------------|-----------------|
| 1 Title                  | SBK03263B.1.fid |
| 2 Solvent                | CDCl3           |
| 3 Temperature            | 297.2           |
| 4 Number of Scans        | 16              |
| 5 Receiver Gain          | 128.0           |
| 6 Relaxation Delay       | 1.0000          |
| 7 Pulse Width            | 10.5000         |
| 8 Spectrometer Frequency | 600.32          |
| 9 Nucleus                | <sup>1</sup> H  |

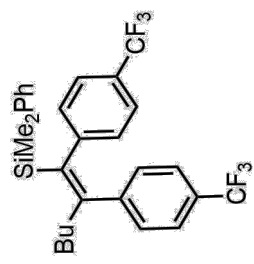

**4**  
 Chemical Formula: C<sub>28</sub>H<sub>28</sub>F<sub>6</sub>Si  
 Exact Mass: 506.1864  
 Molecular Weight: 506.6074

1.10  
1.09  
1.08  
1.08  
1.08  
0.75  
0.74  
0.73  
0.38

2.54  
2.52  
2.51

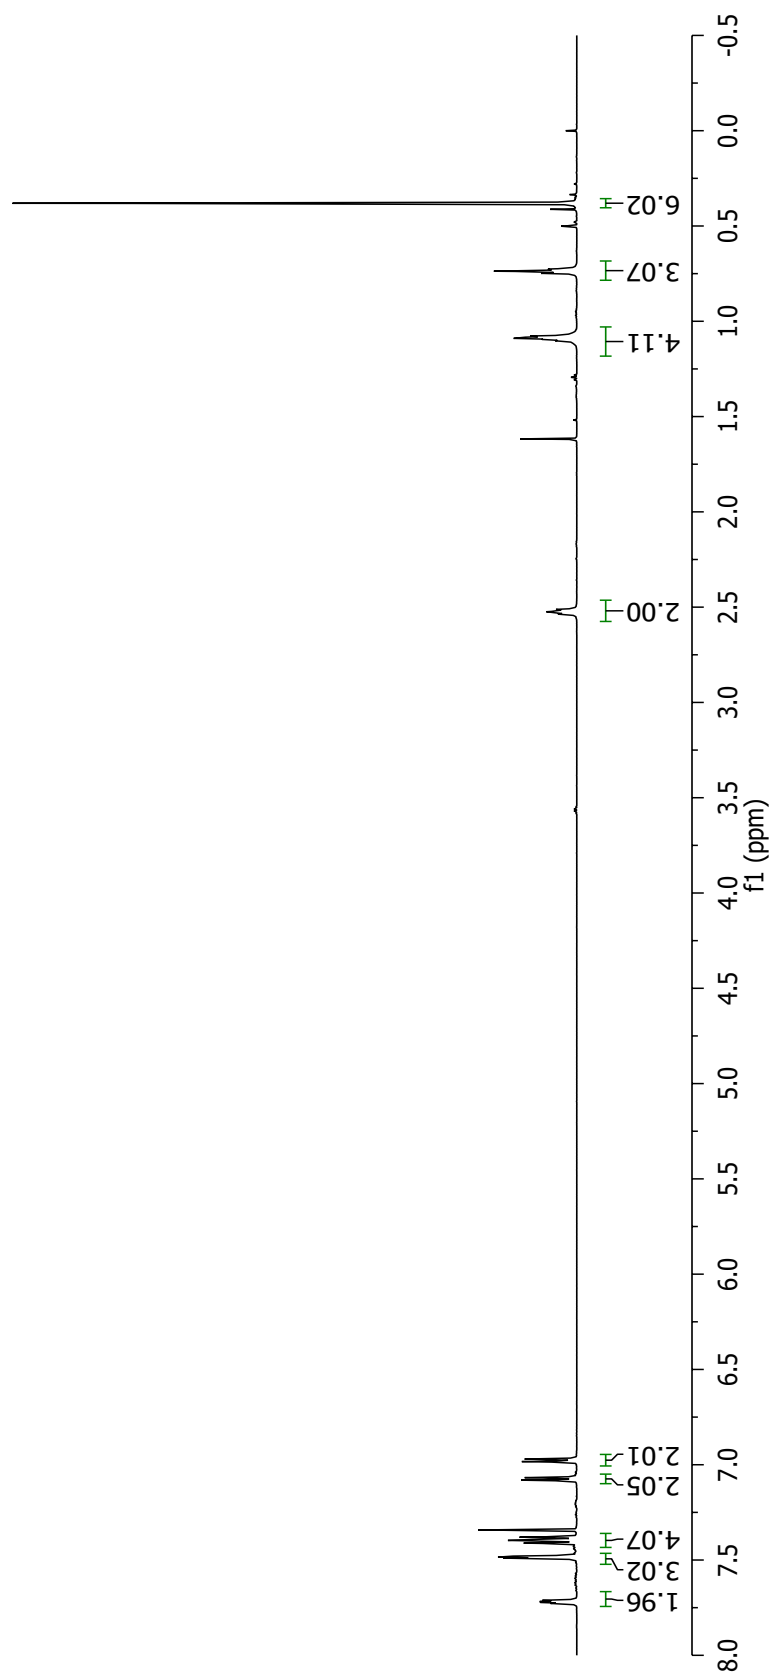

155.52  
148.04  
148.03  
146.35  
146.34  
139.08  
138.96  
133.79  
129.32  
129.29  
128.89  
128.44  
128.25  
128.16  
127.71  
127.66  
127.39  
127.34  
127.07  
127.02  
126.75  
126.72  
125.74  
125.55  
124.74  
124.70  
124.67  
124.65  
124.61  
124.57  
123.04  
122.85  
120.34  
120.15

| Parameter                | Value                |
|--------------------------|----------------------|
| 1 Title                  | SBK03263-CDC13.1.fid |
| 2 Solvent                | CDCl3                |
| 3 Temperature            | 298.2                |
| 4 Number of Scans        | 1024                 |
| 5 Receiver Gain          | 512.0                |
| 6 Relaxation Delay       | 3.0000               |
| 7 Pulse Width            | 10.7000              |
| 8 Spectrometer Frequency | 100.62               |
| 9 Nucleus                | 13C                  |

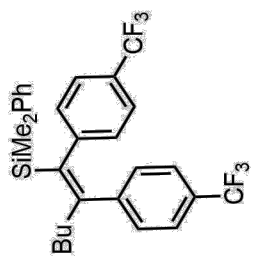

**4**  
 Chemical Formula: C<sub>28</sub>H<sub>28</sub>F<sub>6</sub>Si  
 Exact Mass: 506.1864  
 Molecular Weight: 506.6074

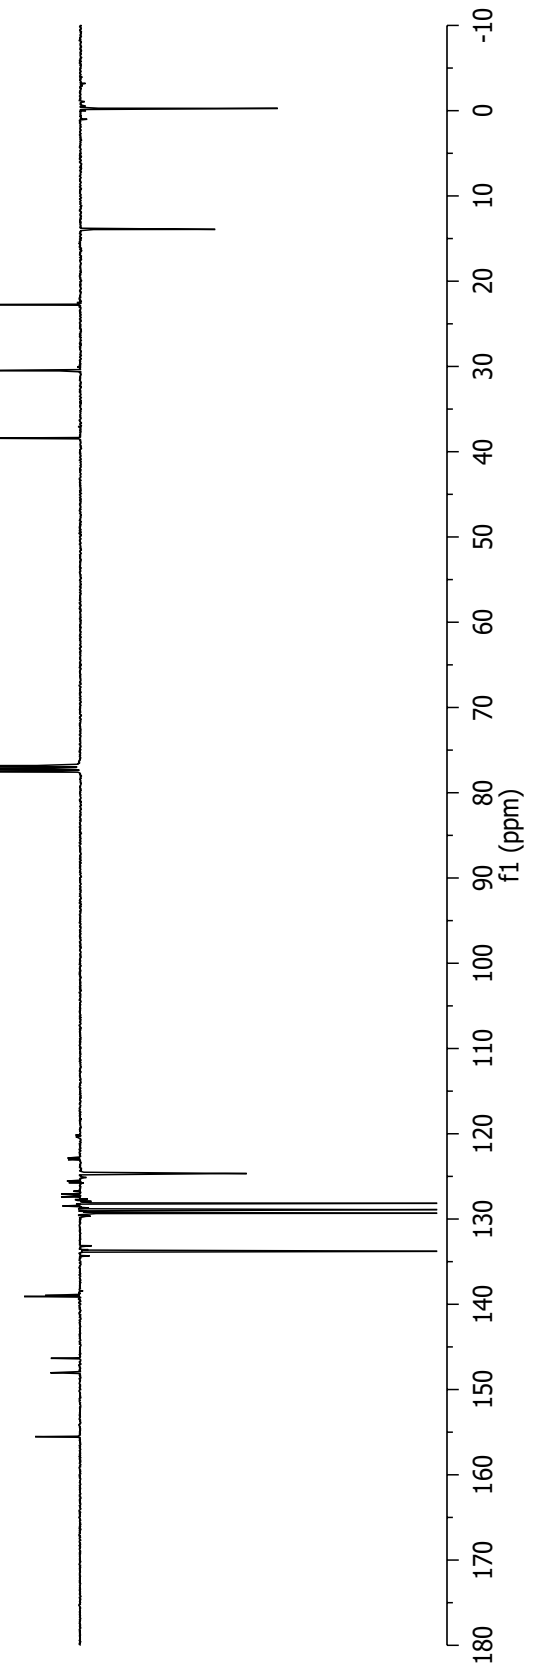

11.20

| Parameter                | Value           |
|--------------------------|-----------------|
| 1 Title                  | SBK032638.4.fid |
| 2 Solvent                | CDCl3           |
| 3 Temperature            | 297.4           |
| 4 Number of Scans        | 256             |
| 5 Receiver Gain          | 1030.0          |
| 6 Relaxation Delay       | 12.5000         |
| 7 Pulse Width            | 13.5000         |
| 8 Spectrometer Frequency | 119.26          |
| 9 Nucleus                | 29Si            |

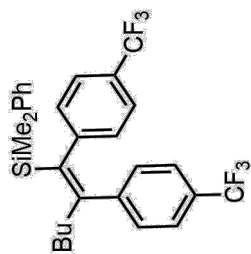

4

Chemical Formula: C<sub>28</sub>H<sub>28</sub>F<sub>6</sub>Si

Exact Mass: 506.1864

Molecular Weight: 506.6074

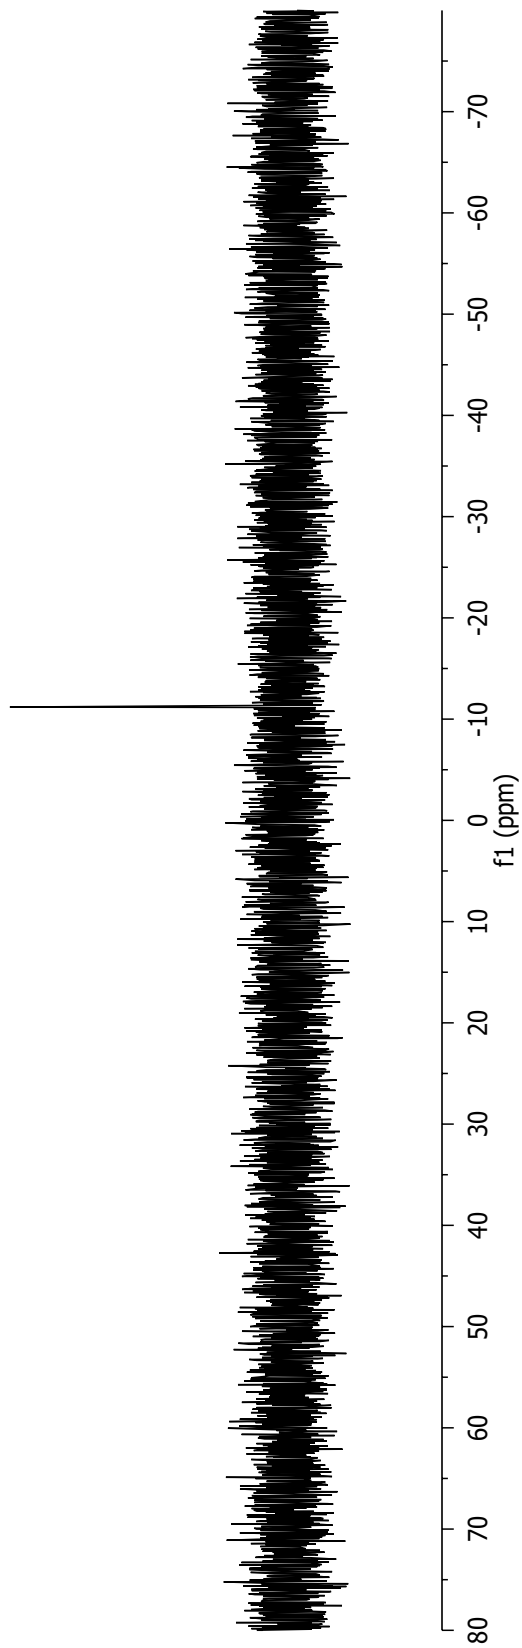

62.52  
62.33

| Parameter                | Value               |
|--------------------------|---------------------|
| 1 Title                  | SBK03263B-19F.1.fid |
| 2 Solvent                | CDCl3               |
| 3 Temperature            | 300.0               |
| 4 Number of Scans        | 16                  |
| 5 Receiver Gain          | 322.0               |
| 6 Relaxation Delay       | 3.0000              |
| 7 Pulse Width            | 11.4000             |
| 8 Spectrometer Frequency | 564.81              |
| 9 Nucleus                | 19F                 |

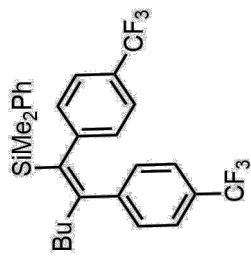

4

Chemical Formula: C<sub>28</sub>H<sub>28</sub>F<sub>6</sub>Si  
Exact Mass: 506.1864  
Molecular Weight: 506.6074

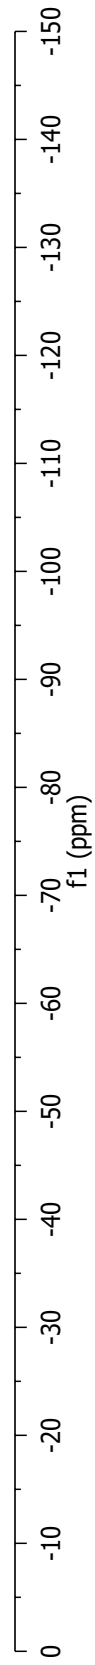

7.63  
7.63  
7.39  
7.39  
7.38  
6.85  
6.84  
6.83  
6.82  
6.77  
6.75  
6.75  
6.74  
6.73  
6.72  
6.70

| Parameter                | Value           |
|--------------------------|-----------------|
| 1 Title                  | SBK03245B.1.fid |
| 2 Solvent                | CDCl3           |
| 3 Temperature            | 298.0           |
| 4 Number of Scans        | 16              |
| 5 Receiver Gain          | 144.0           |
| 6 Relaxation Delay       | 1.0000          |
| 7 Pulse Width            | 10.5000         |
| 8 Spectrometer Frequency | 600.32          |
| 9 Nucleus                | <sup>1</sup> H  |

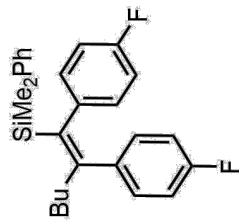

**5**

Chemical Formula: C<sub>26</sub>H<sub>28</sub>F<sub>2</sub>Si

Exact Mass: 406.1928

Molecular Weight: 406.5918

1.01  
1.00  
0.99  
0.98  
0.66  
0.65  
0.64  
0.28

2.41  
2.40  
2.38

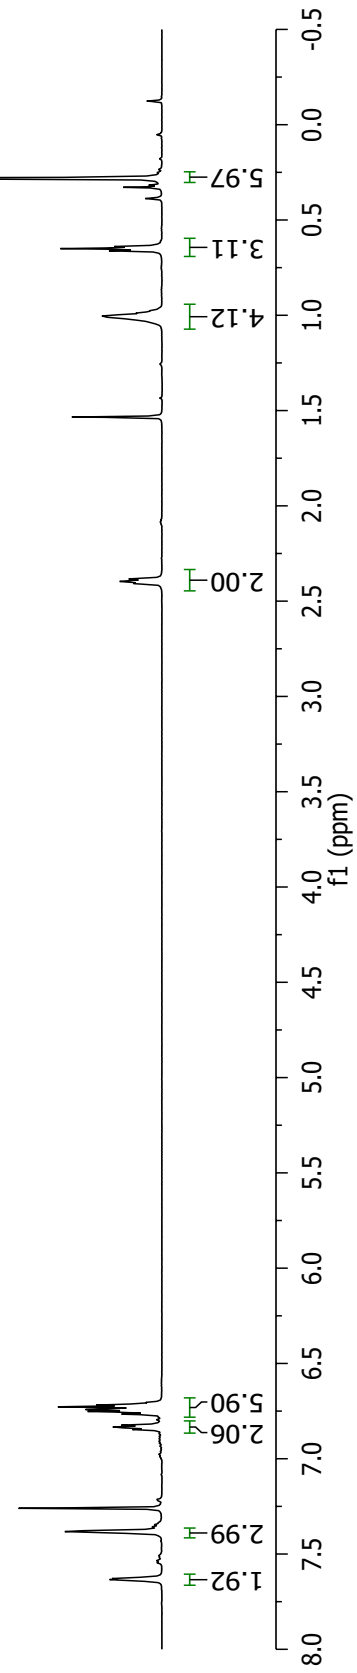

161.85  
161.34  
160.23  
159.73  
155.90  
140.27  
140.25  
139.81  
138.84  
138.82  
138.00  
133.84  
133.84  
130.63  
130.58  
130.24  
130.19  
129.05  
128.04  
114.52  
114.48  
114.38  
114.34

| Parameter                | Value              |
|--------------------------|--------------------|
| 1 Title                  | SBK03245B-Si.2.fid |
| 2 Solvent                | CDCl3              |
| 3 Temperature            | 298.0              |
| 4 Number of Scans        | 1024               |
| 5 Receiver Gain          | 2050.0             |
| 6 Relaxation Delay       | 5.0000             |
| 7 Pulse Width            | 10.6300            |
| 8 Spectrometer Frequency | 150.97             |
| 9 Nucleus                | 13C                |

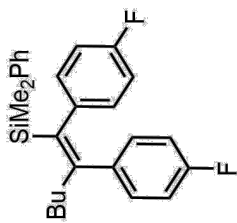

**5**  
 Chemical Formula: C<sub>26</sub>H<sub>28</sub>F<sub>2</sub>Si  
 Exact Mass: 406.1928  
 Molecular Weight: 406.5918

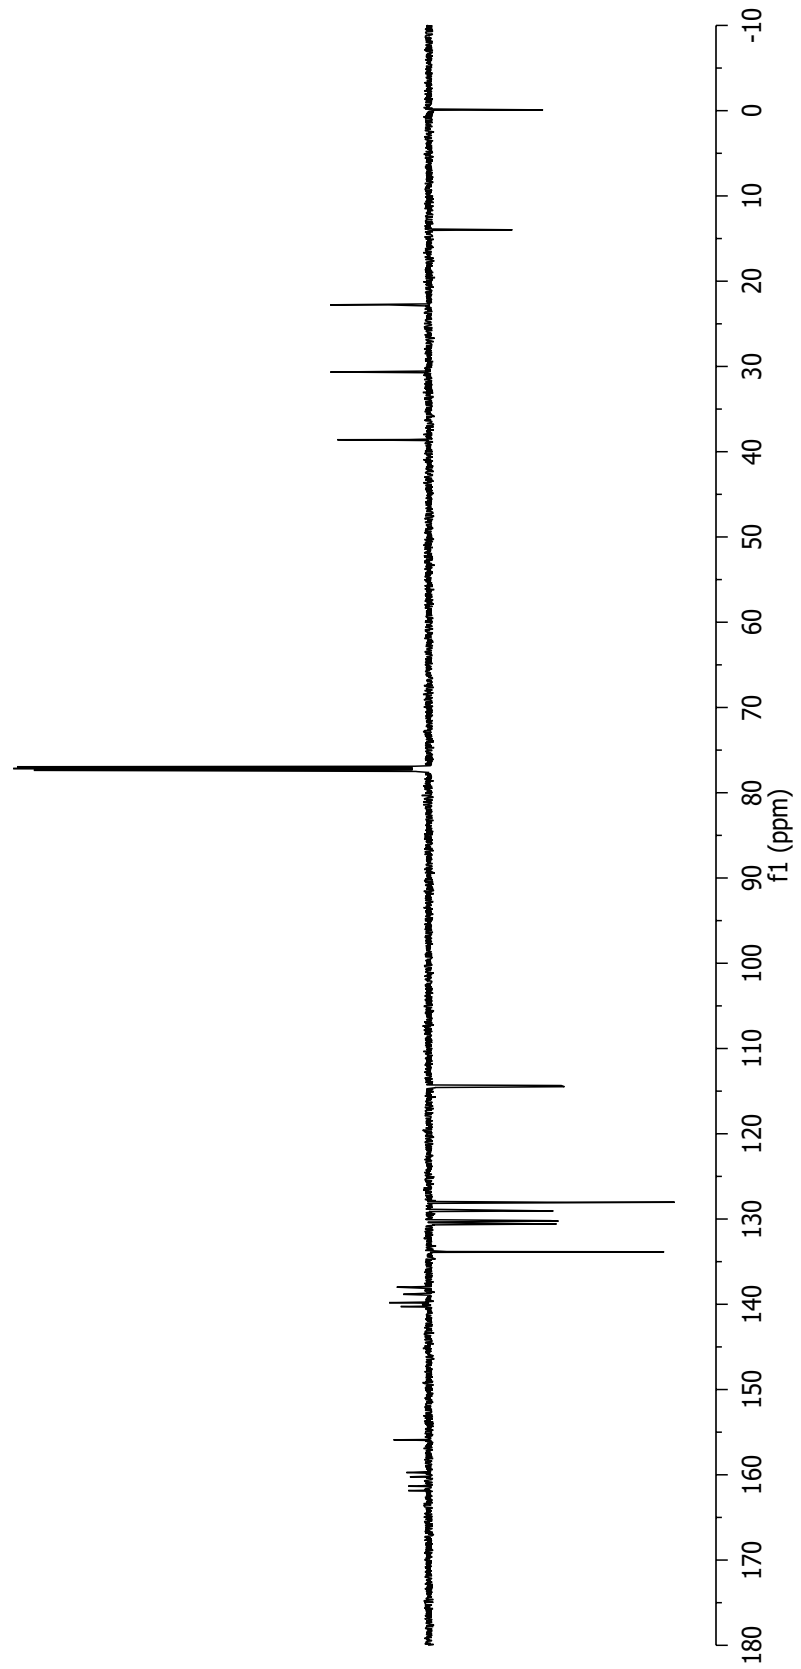

-11.51

| Parameter                | Value                |
|--------------------------|----------------------|
| 1 Title                  | SBK03245B-Si.1.1.fid |
| 2 Solvent                | CDCl3                |
| 3 Temperature            | 298.0                |
| 4 Number of Scans        | 256                  |
| 5 Receiver Gain          | 1030.0               |
| 6 Relaxation Delay       | 12.5000              |
| 7 Pulse Width            | 13.5000              |
| 8 Spectrometer Frequency | 119.26               |
| 9 Nucleus                | <sup>29</sup> Si     |

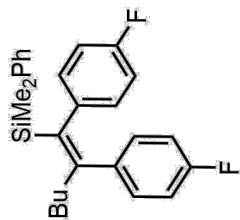

**5**

Chemical Formula: C<sub>26</sub>H<sub>28</sub>F<sub>2</sub>Si  
Exact Mass: 406.1928  
Molecular Weight: 406.5918

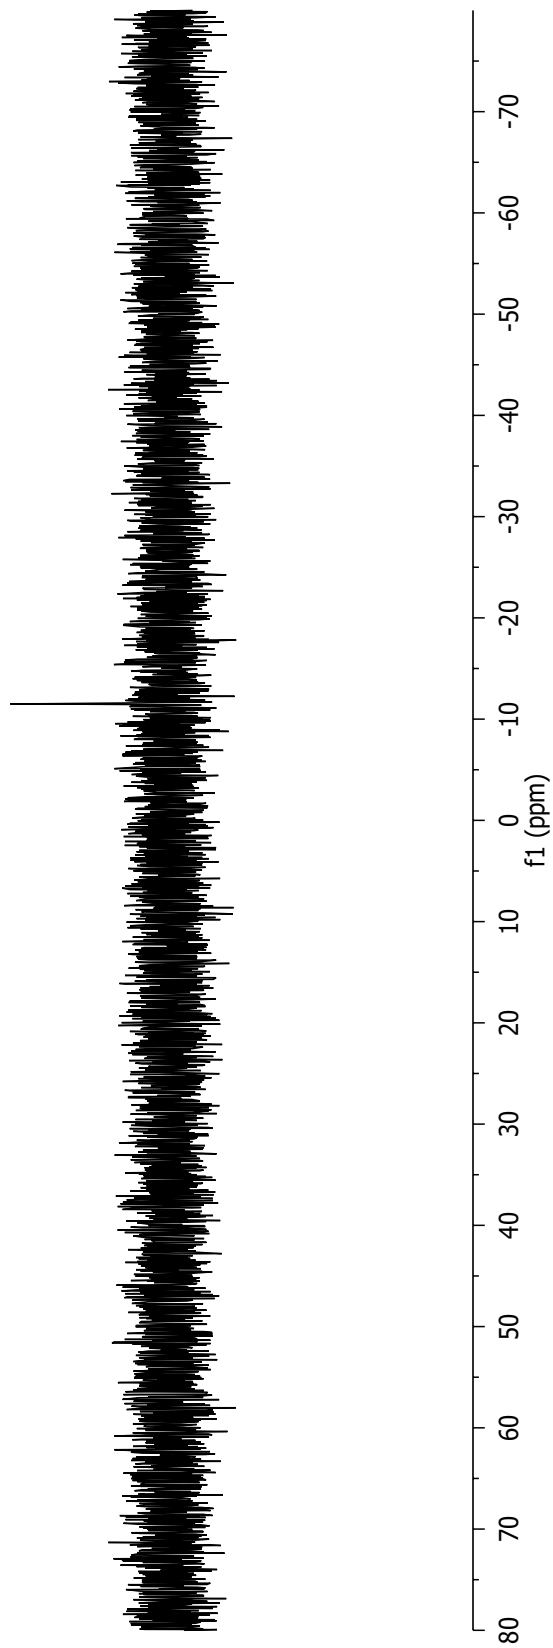



| Parameter                | Value           |
|--------------------------|-----------------|
| 1 Title                  | SBK03245B.4.fid |
| 2 Solvent                | CDCl3           |
| 3 Temperature            | 300.0           |
| 4 Number of Scans        | 16              |
| 5 Receiver Gain          | 322.0           |
| 6 Relaxation Delay       | 3.0000          |
| 7 Pulse Width            | 11.4000         |
| 8 Spectrometer Frequency | 564.81          |
| 9 Nucleus                | 19F             |

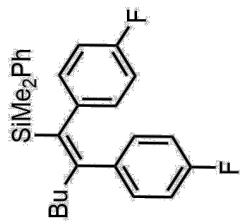

**5**

Chemical Formula: C<sub>26</sub>H<sub>28</sub>F<sub>2</sub>Si

Exact Mass: 406.1928

Molecular Weight: 406.5918

~116.68  
~118.68

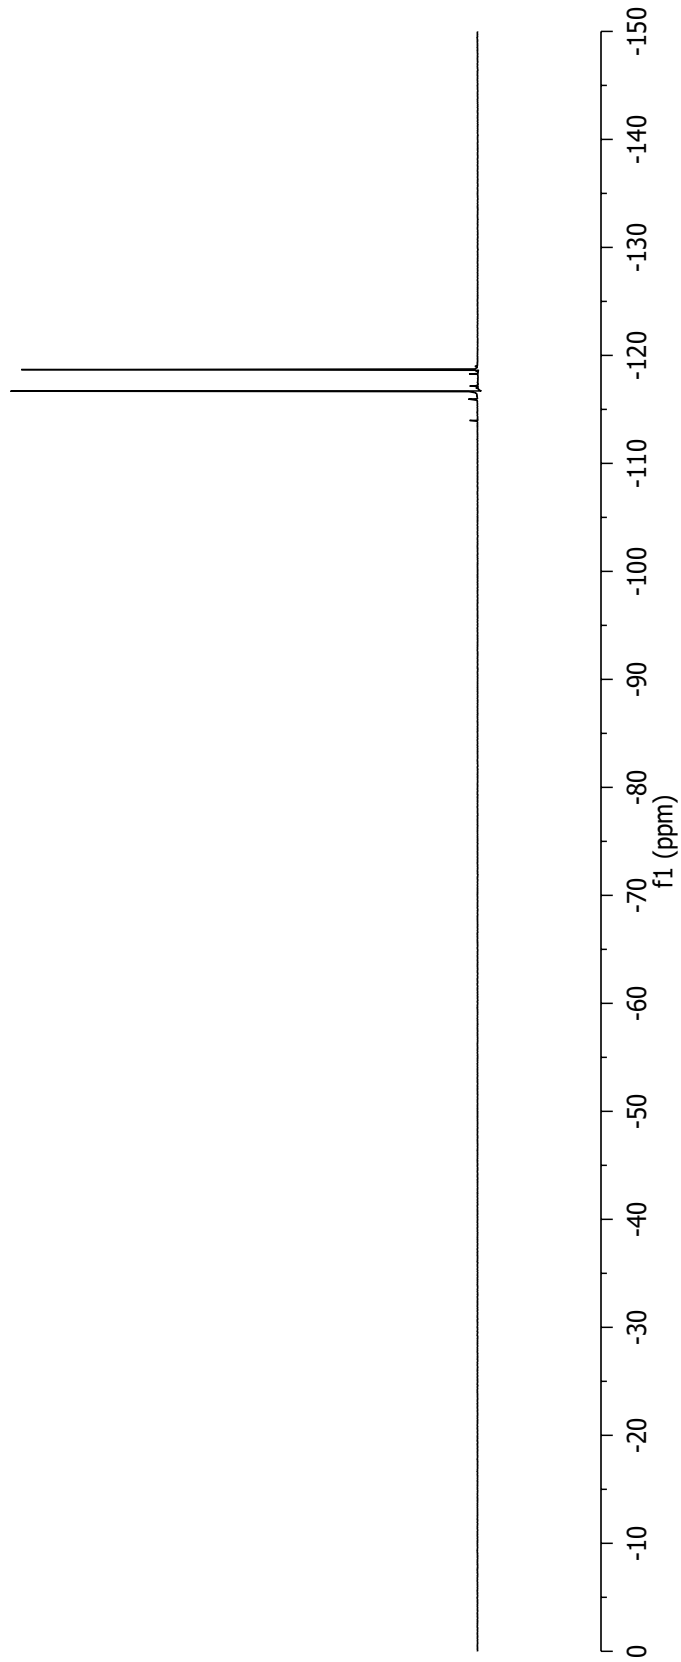

7.64  
7.63  
7.63  
7.62  
7.62  
7.61  
7.39  
7.39  
7.38  
7.05  
7.04  
7.03  
7.02  
6.82  
6.80  
6.72  
6.70

| Parameter                | Value           |
|--------------------------|-----------------|
| 1 Title                  | MFW02053A.1.fid |
| 2 Solvent                | CDCl3           |
| 3 Temperature            | 298.2           |
| 4 Number of Scans        | 16              |
| 5 Receiver Gain          | 12.7            |
| 6 Relaxation Delay       | 1.0000          |
| 7 Pulse Width            | 15.0000         |
| 8 Spectrometer Frequency | 400.13          |
| 9 Nucleus                | <sup>1</sup> H  |

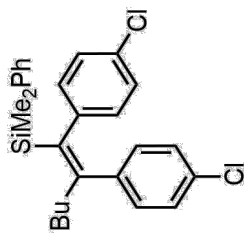

**6**

Chemical Formula: C<sub>28</sub>H<sub>28</sub>Cl<sub>2</sub>Si  
 Exact Mass: 438.1337  
 Molecular Weight: 439.4950

2.40  
2.38  
2.36  
1.01  
1.00  
0.99  
0.98  
0.97  
0.66  
0.64  
0.64  
0.63  
0.62  
0.27

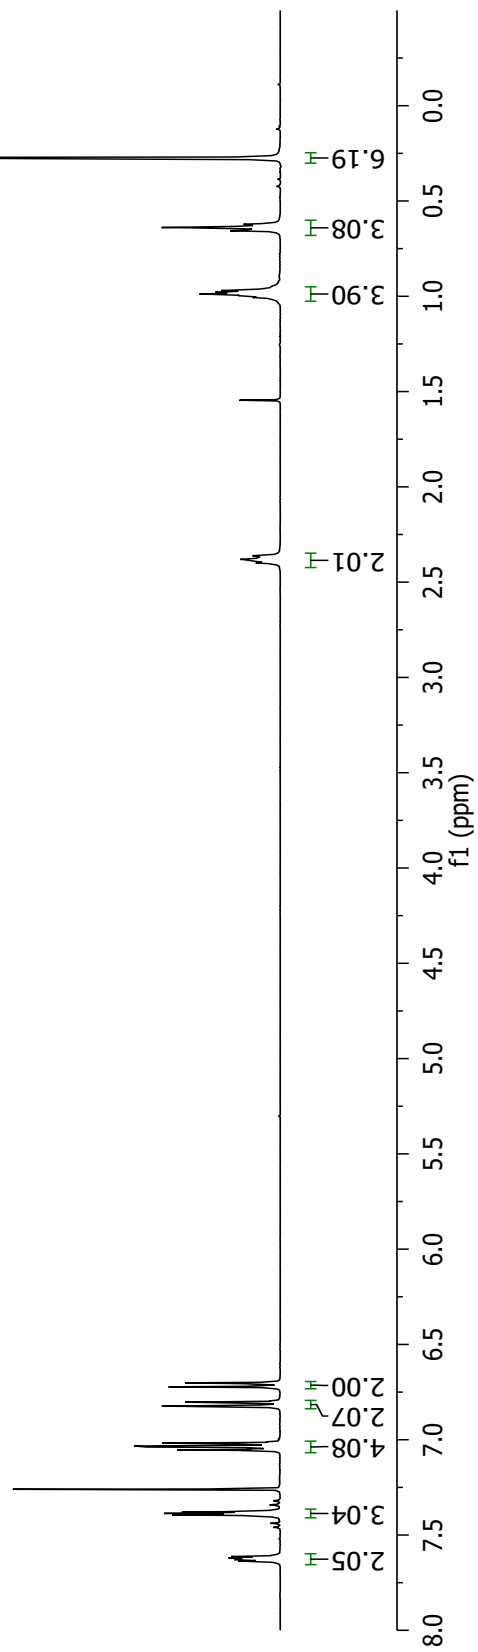

155.55  
142.77  
141.22  
139.55  
138.06  
133.80  
131.77  
130.63  
130.63  
130.52  
130.03  
129.13  
128.07  
127.85  
127.81

| Parameter                | Value           |
|--------------------------|-----------------|
| 1 Title                  | MFW02053A.2.fid |
| 2 Solvent                | CDCl3           |
| 3 Temperature            | 298.2           |
| 4 Number of Scans        | 256             |
| 5 Receiver Gain          | 512.0           |
| 6 Relaxation Delay       | 3.0000          |
| 7 Pulse Width            | 10.7000         |
| 8 Spectrometer Frequency | 100.62          |
| 9 Nucleus                | <sup>13</sup> C |

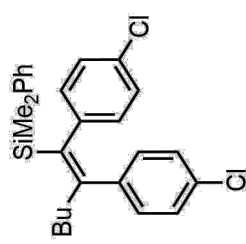

**6**

Chemical Formula: C<sub>28</sub>H<sub>28</sub>Cl<sub>2</sub>Si  
 Exact Mass: 438.1337  
 Molecular Weight: 439.4950

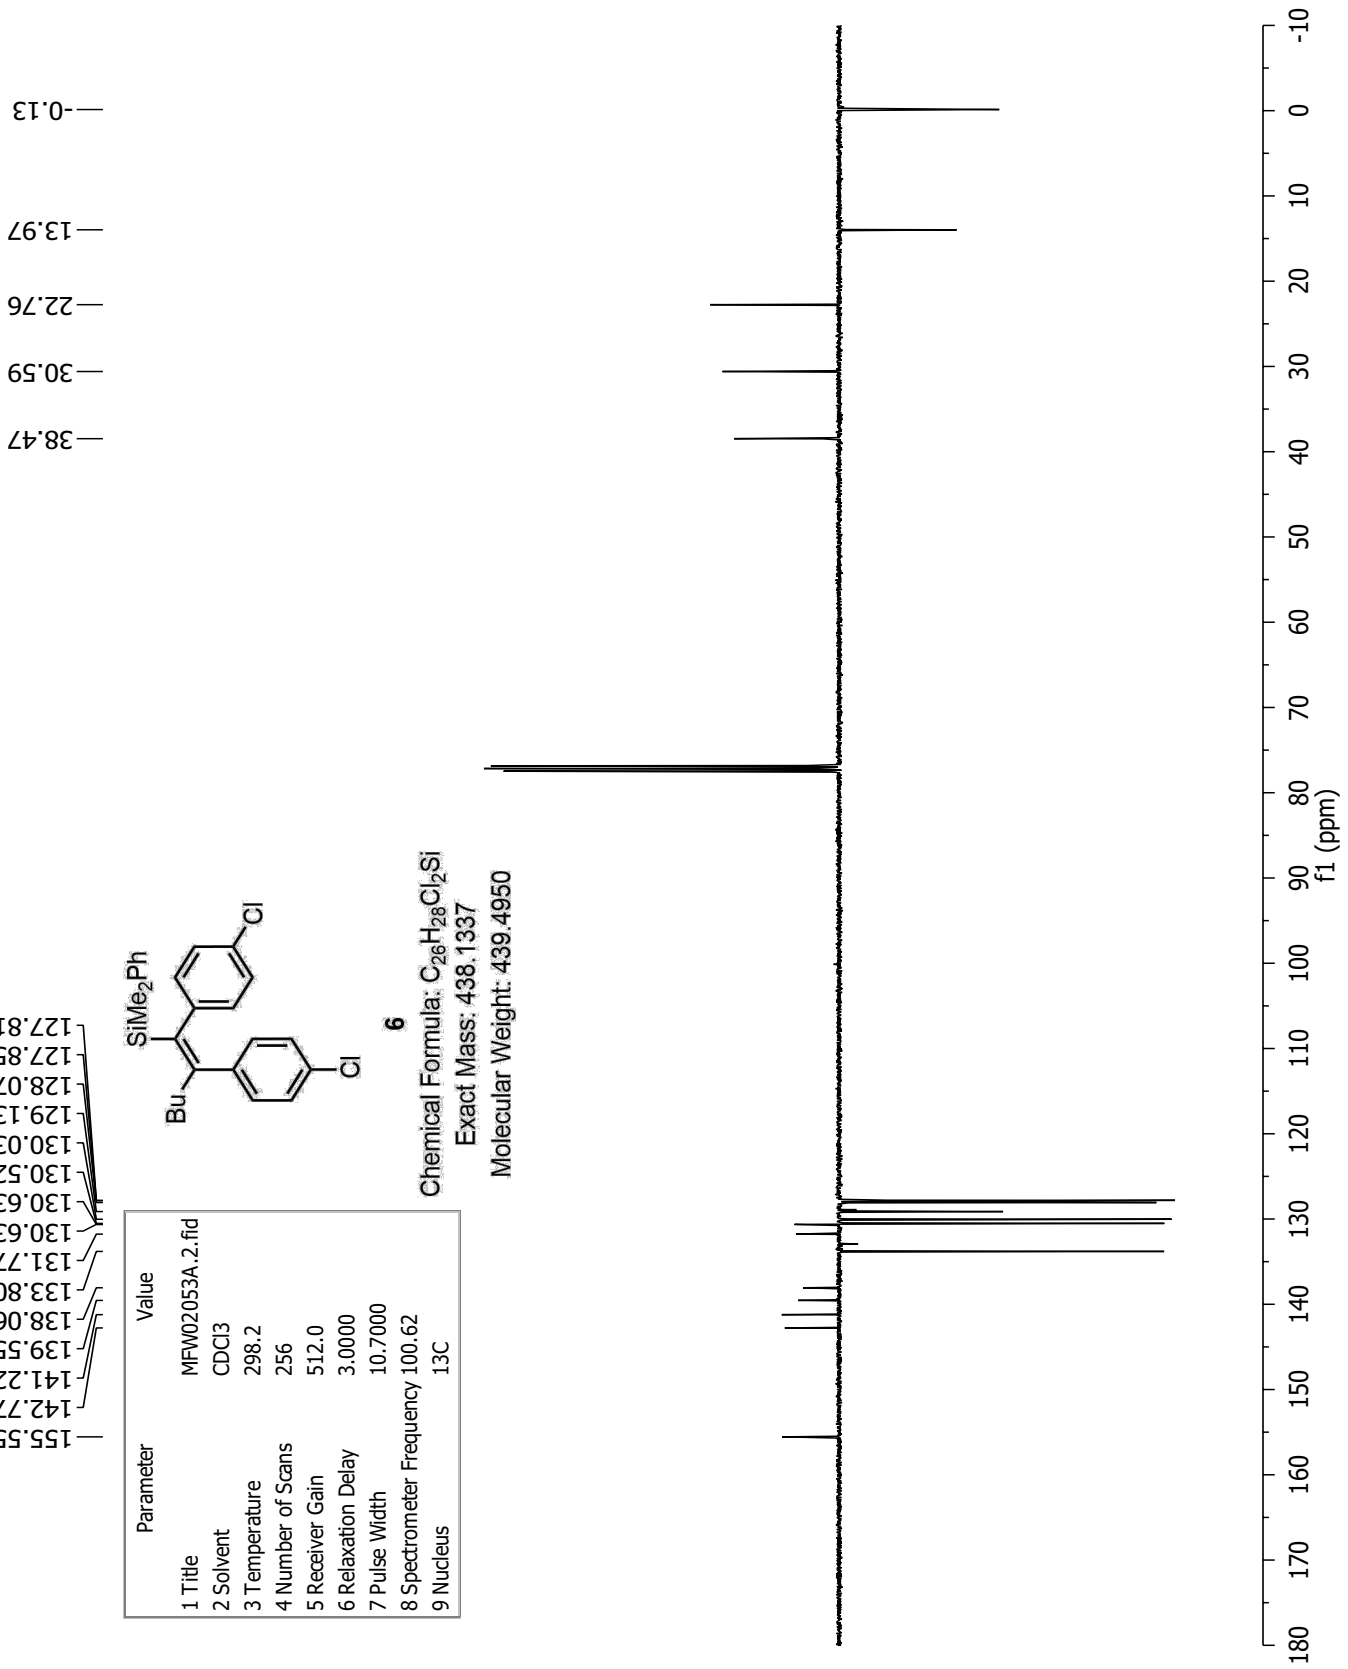

| Parameter                | Value                  |
|--------------------------|------------------------|
| 1 Title                  | MFW02053col2A-Si.2.fid |
| 2 Solvent                | CDCl3                  |
| 3 Temperature            | 300.0                  |
| 4 Number of Scans        | 128                    |
| 5 Receiver Gain          | 1030.0                 |
| 6 Relaxation Delay       | 12.5000                |
| 7 Pulse Width            | 13.5000                |
| 8 Spectrometer Frequency | 119.26                 |
| 9 Nucleus                | 29Si                   |

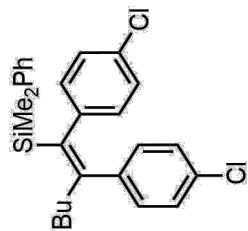

**6**

Chemical Formula: C<sub>28</sub>H<sub>28</sub>Cl<sub>2</sub>Si

Exact Mass: 438.1337

Molecular Weight: 439.4950

---11.47

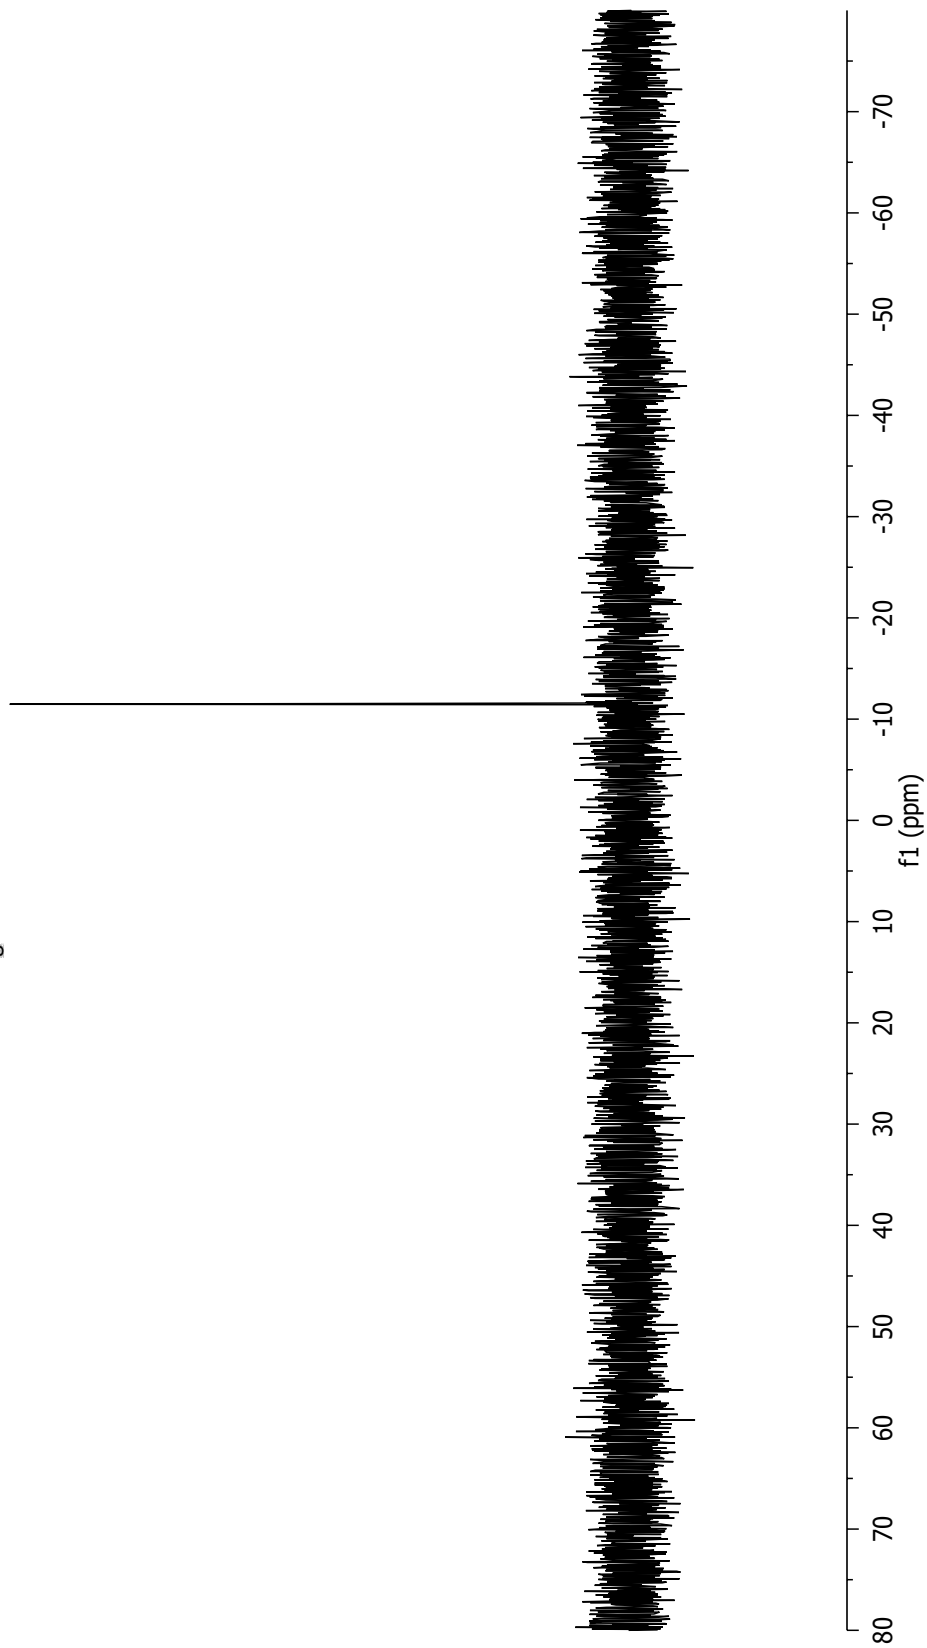

7.65  
7.65  
7.64  
7.63  
7.41  
7.40  
7.39  
7.22  
7.21  
7.20  
7.19  
6.79  
6.77  
6.69  
6.67

| Parameter                | Value               |
|--------------------------|---------------------|
| 1 Title                  | MFW02056A-NOE.1.fid |
| 2 Solvent                | CDCl3               |
| 3 Temperature            | 298.2               |
| 4 Number of Scans        | 16                  |
| 5 Receiver Gain          | 9.0                 |
| 6 Relaxation Delay       | 1.0000              |
| 7 Pulse Width            | 15.0000             |
| 8 Spectrometer Frequency | 400.13              |
| 9 Nucleus                | <sup>1</sup> H      |

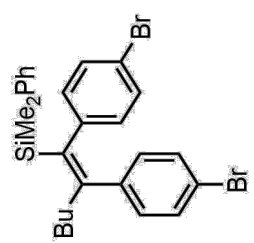

7

Chemical Formula: C<sub>26</sub>H<sub>28</sub>Br<sub>2</sub>Si  
 Exact Mass: 526.0327  
 Molecular Weight: 528.4030

1.01  
1.00  
0.99  
0.98  
0.67  
0.65  
0.64  
0.29

2.41  
2.40  
2.38

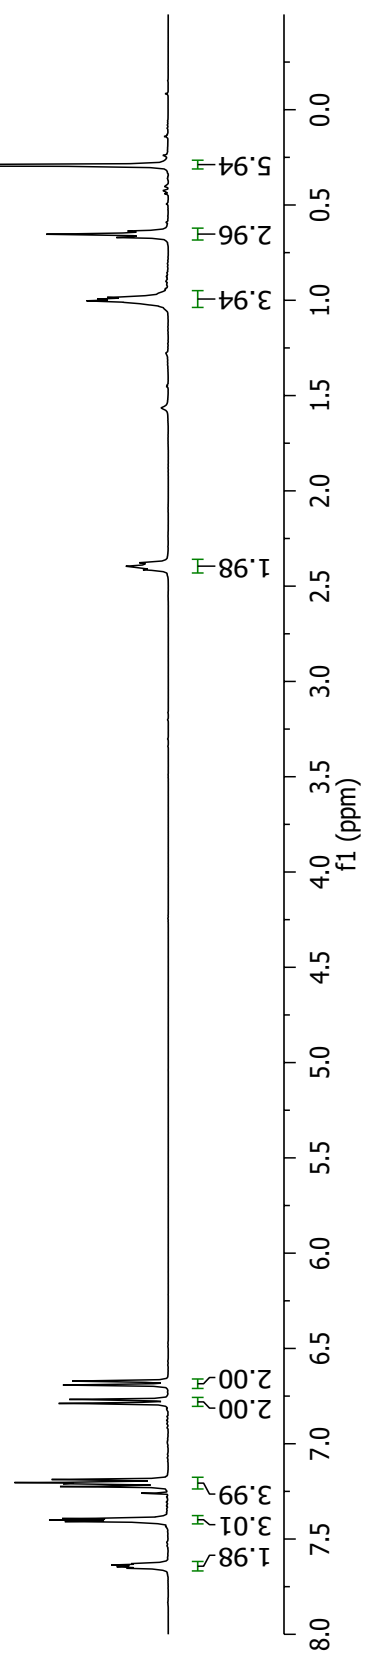

155.49  
143.27  
141.72  
139.52  
138.22  
133.81  
130.92  
130.81  
130.78  
130.38  
129.14  
128.08  
120.06  
118.86

| Parameter                | Value           |
|--------------------------|-----------------|
| 1 Title                  | MFW02056A.4.fid |
| 2 Solvent                | CDCl3           |
| 3 Temperature            | 300.0           |
| 4 Number of Scans        | 256             |
| 5 Receiver Gain          | 2050.0          |
| 6 Relaxation Delay       | 5.0000          |
| 7 Pulse Width            | 10.6300         |
| 8 Spectrometer Frequency | 150.97          |
| 9 Nucleus                | 13C             |

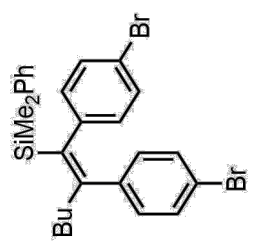

7

Chemical Formula: C<sub>26</sub>H<sub>28</sub>Br<sub>2</sub>Si  
 Exact Mass: 526.0327  
 Molecular Weight: 528.4030

38.45  
30.59  
22.74  
13.91  
-0.14

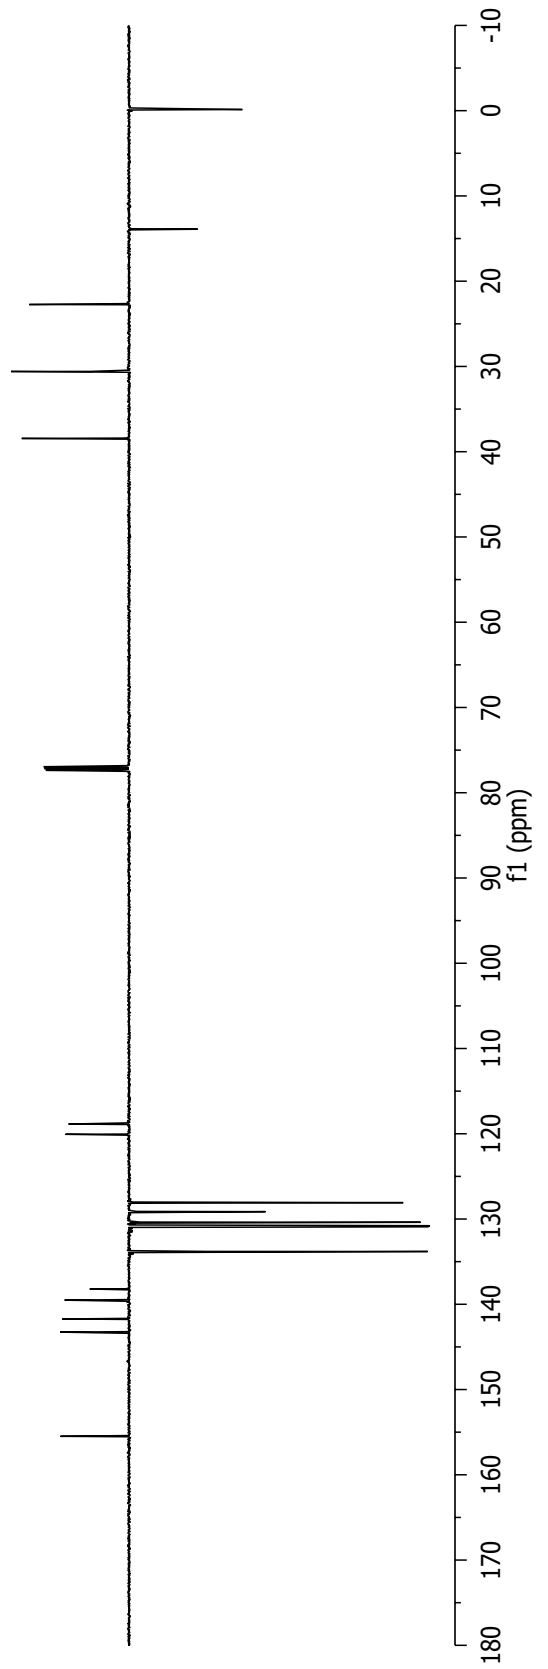

| Parameter                | Value                  |
|--------------------------|------------------------|
| 1 Title                  | MFW02056col2A-Si.2.fid |
| 2 Solvent                | CDCl3                  |
| 3 Temperature            | 300.0                  |
| 4 Number of Scans        | 128                    |
| 5 Receiver Gain          | 2050.0                 |
| 6 Relaxation Delay       | 12.5000                |
| 7 Pulse Width            | 13.5000                |
| 8 Spectrometer Frequency | 119.26                 |
| 9 Nucleus                | 29Si                   |

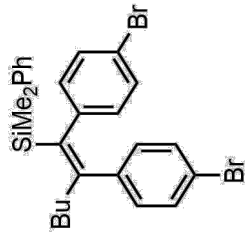

7

Chemical Formula:  $C_{26}H_{28}Br_2Si$

Exact Mass: 526.0327

Molecular Weight: 528.4030

---11.49

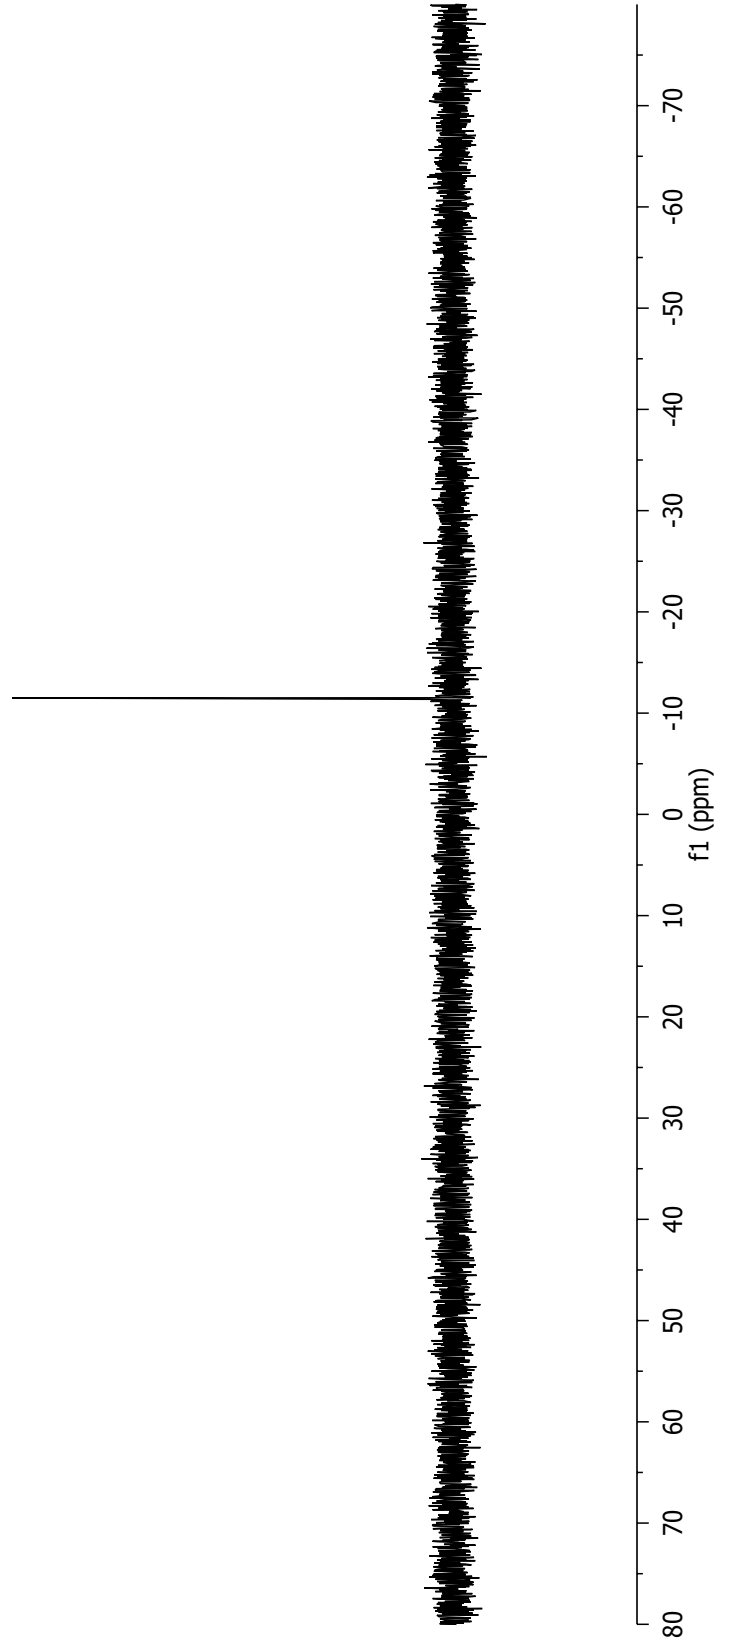

7.69  
7.69  
7.68  
7.68  
7.41  
7.40  
7.40  
7.38  
7.38  
7.36  
6.93  
6.92  
6.90  
6.79  
6.78  
6.78  
6.74  
6.72  
6.70  
6.69  
6.63  
6.60  
6.59

| Parameter                | Value           |
|--------------------------|-----------------|
| 1 Title                  | SBK03259B.1.fid |
| 2 Solvent                | CDCl3           |
| 3 Temperature            | 300.0           |
| 4 Number of Scans        | 16              |
| 5 Receiver Gain          | 128.0           |
| 6 Relaxation Delay       | 1.0000          |
| 7 Pulse Width            | 10.5000         |
| 8 Spectrometer Frequency | 600.32          |
| 9 Nucleus                | <sup>1</sup> H  |

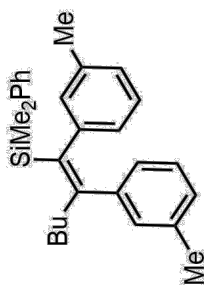

**8**

Chemical Formula: C<sub>28</sub>H<sub>34</sub>Si  
 Exact Mass: 398.2430  
 Molecular Weight: 398.6650

2.41  
2.40  
2.38  
2.17  
1.07  
1.06  
1.05  
1.03  
1.02  
1.01  
1.00  
0.98  
0.97  
0.96  
0.66  
0.65  
0.63  
0.27

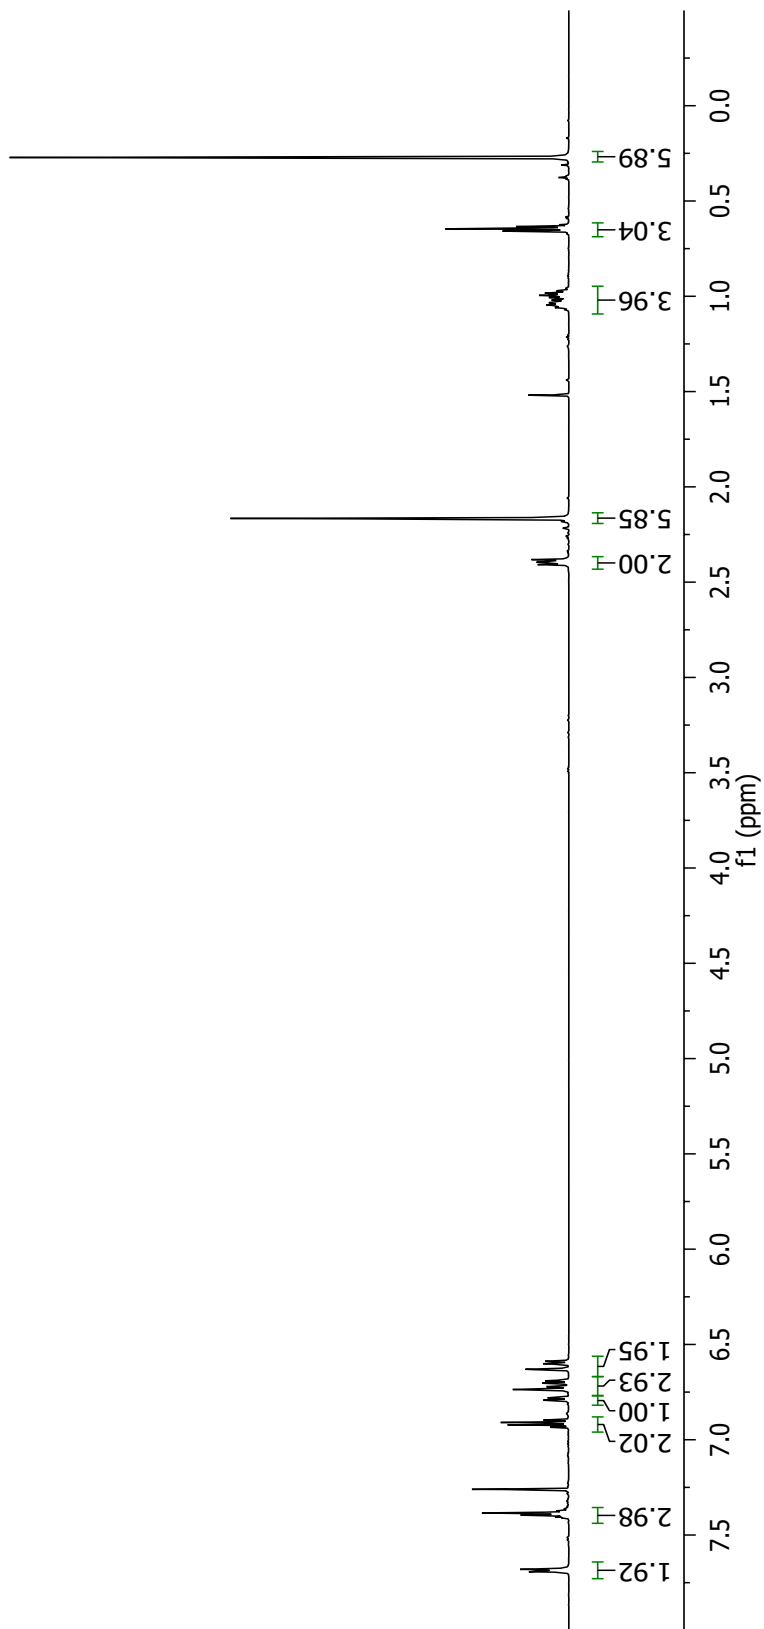



156.00  
144.49  
143.08  
140.52  
137.92  
136.54  
133.93  
130.16  
129.51  
128.83  
127.92  
127.17  
127.03  
126.46  
126.42  
125.94  
125.23

| Parameter                | Value           |
|--------------------------|-----------------|
| 1 Title                  | SBK03259B.3.fid |
| 2 Solvent                | CDCl3           |
| 3 Temperature            | 300.0           |
| 4 Number of Scans        | 1024            |
| 5 Receiver Gain          | 2050.0          |
| 6 Relaxation Delay       | 5.0000          |
| 7 Pulse Width            | 10.6300         |
| 8 Spectrometer Frequency | 150.97          |
| 9 Nucleus                | 13C             |

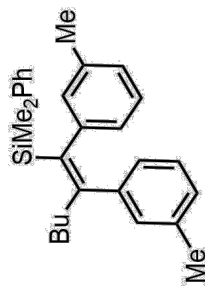

**8**  
 Chemical Formula: C<sub>28</sub>H<sub>34</sub>Si  
 Exact Mass: 398.2430  
 Molecular Weight: 398.6650

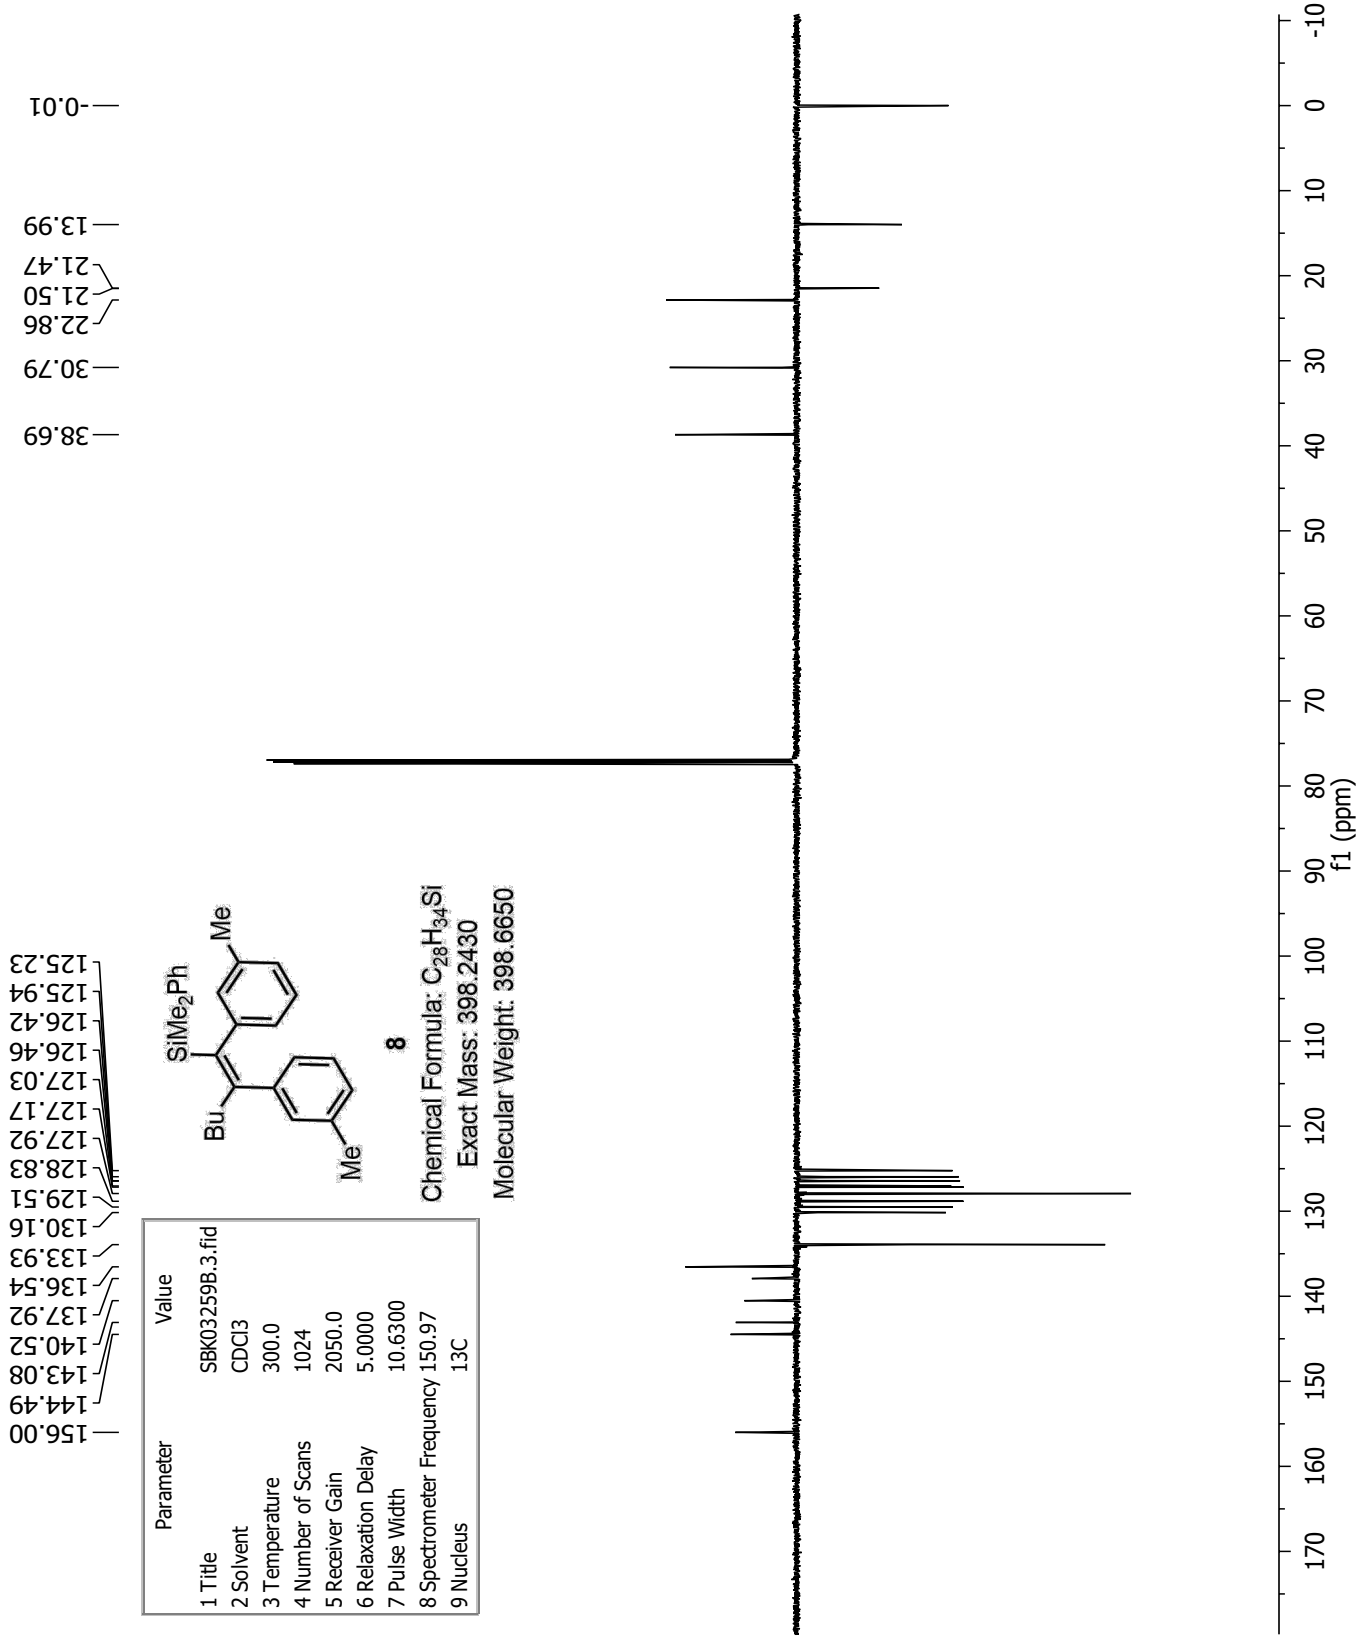

—11.81

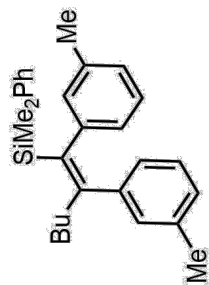

**8**

Chemical Formula:  $C_{28}H_{34}Si$

Exact Mass: 398.2430

Molecular Weight: 398.6650

| Parameter                | Value           |
|--------------------------|-----------------|
| 1 Title                  | SBK03259B.2.fid |
| 2 Solvent                | CDCl3           |
| 3 Temperature            | 300.0           |
| 4 Number of Scans        | 256             |
| 5 Receiver Gain          | 1030.0          |
| 6 Relaxation Delay       | 12.5000         |
| 7 Pulse Width            | 13.5000         |
| 8 Spectrometer Frequency | 119.26          |
| 9 Nucleus                | $^{29}Si$       |

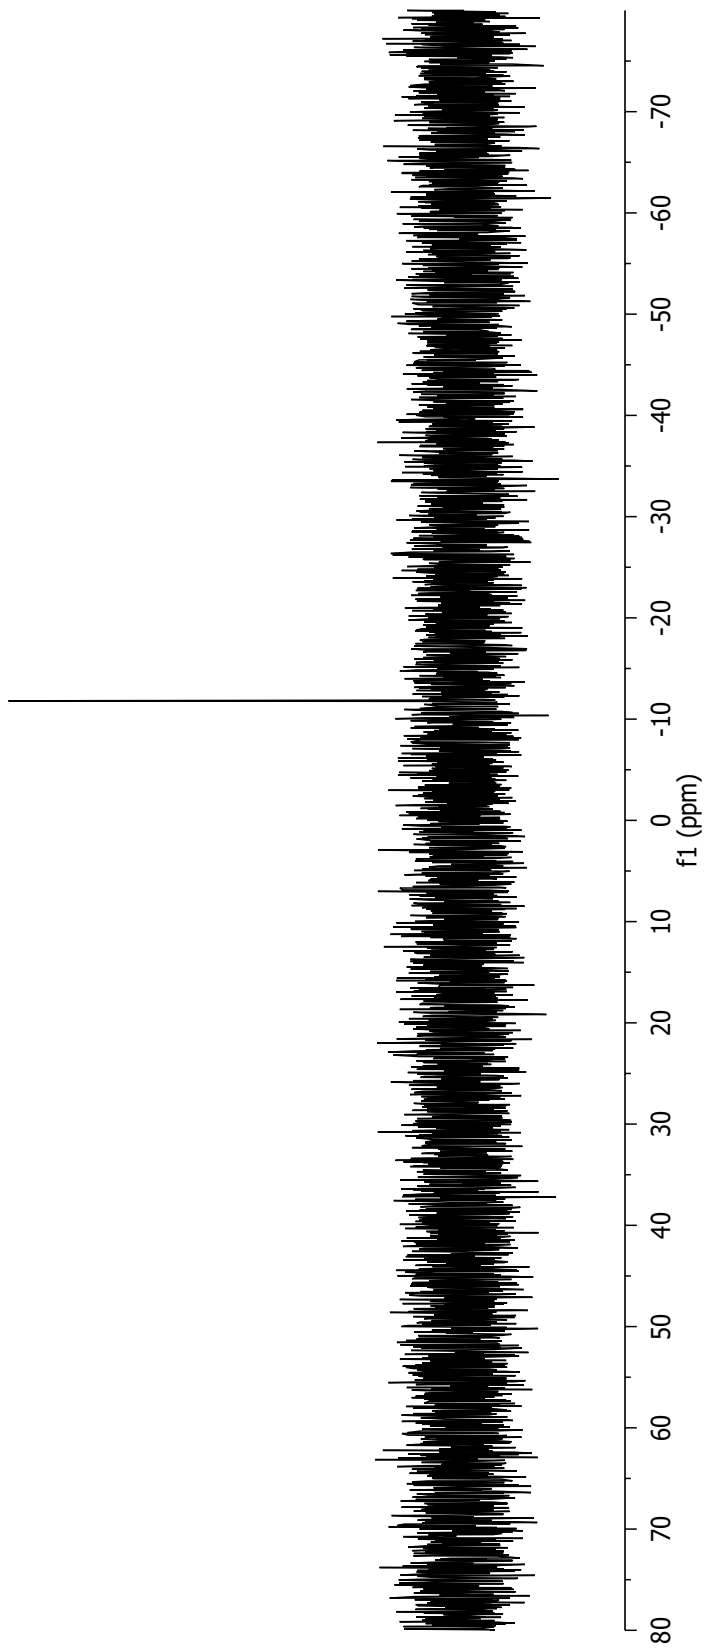

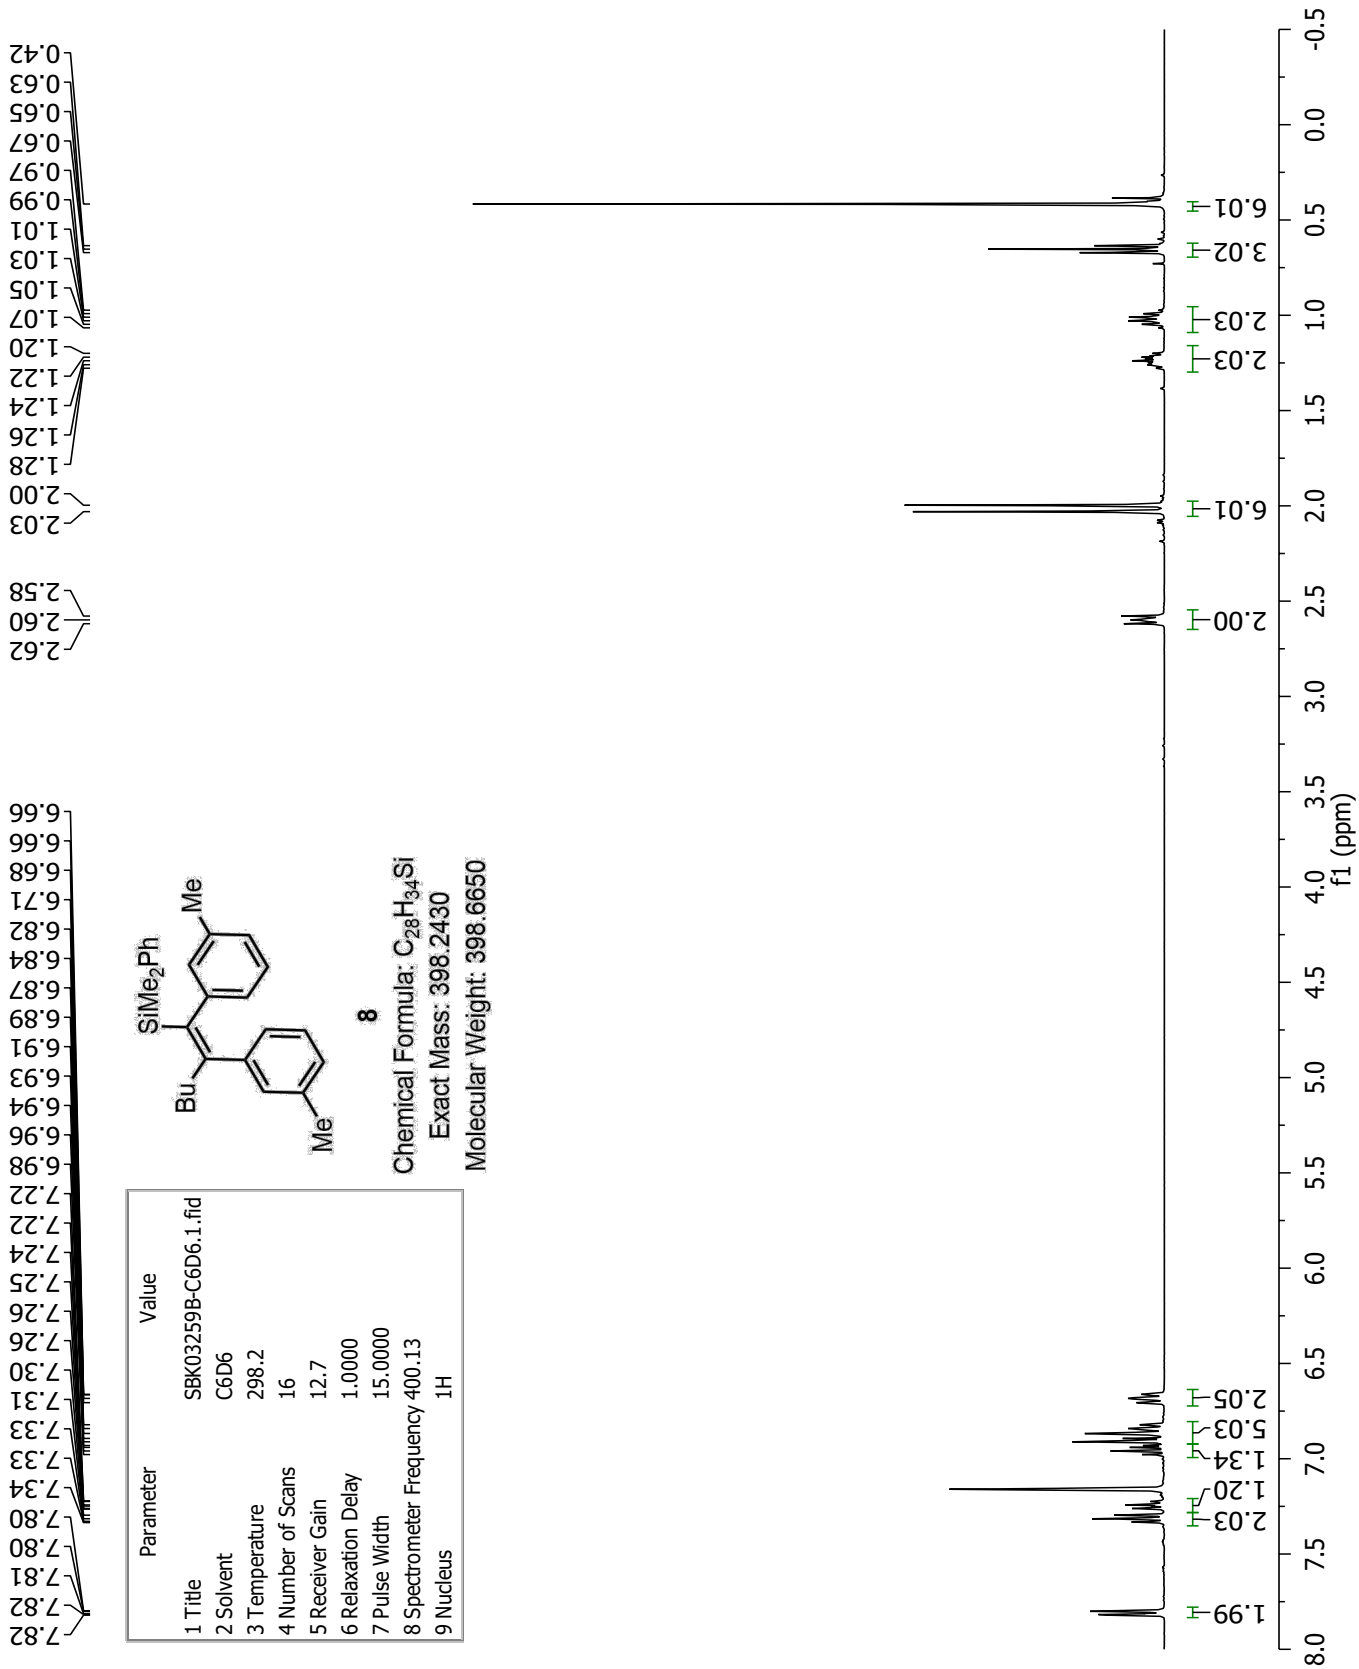

156.42  
144.87  
143.33  
140.64  
138.36  
136.95  
136.87  
134.20  
134.19  
130.29  
129.61  
129.20  
128.39  
127.78  
127.63  
127.08  
126.86  
126.40  
125.89

| Parameter                | Value                |
|--------------------------|----------------------|
| 1 Title                  | SBK03259B-C6D6.2.fid |
| 2 Solvent                | C6D6                 |
| 3 Temperature            | 298.2                |
| 4 Number of Scans        | 1024                 |
| 5 Receiver Gain          | 512.0                |
| 6 Relaxation Delay       | 3.0000               |
| 7 Pulse Width            | 10.7000              |
| 8 Spectrometer Frequency | 100.62               |
| 9 Nucleus                | <sup>13</sup> C      |

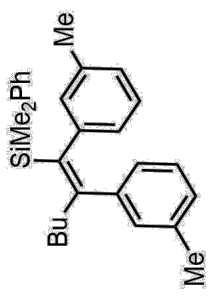

**8**

Chemical Formula: C<sub>28</sub>H<sub>34</sub>Si  
 Exact Mass: 398.2430  
 Molecular Weight: 398.6650

39.12  
31.18  
23.13  
21.48  
21.41  
14.14  
0.18

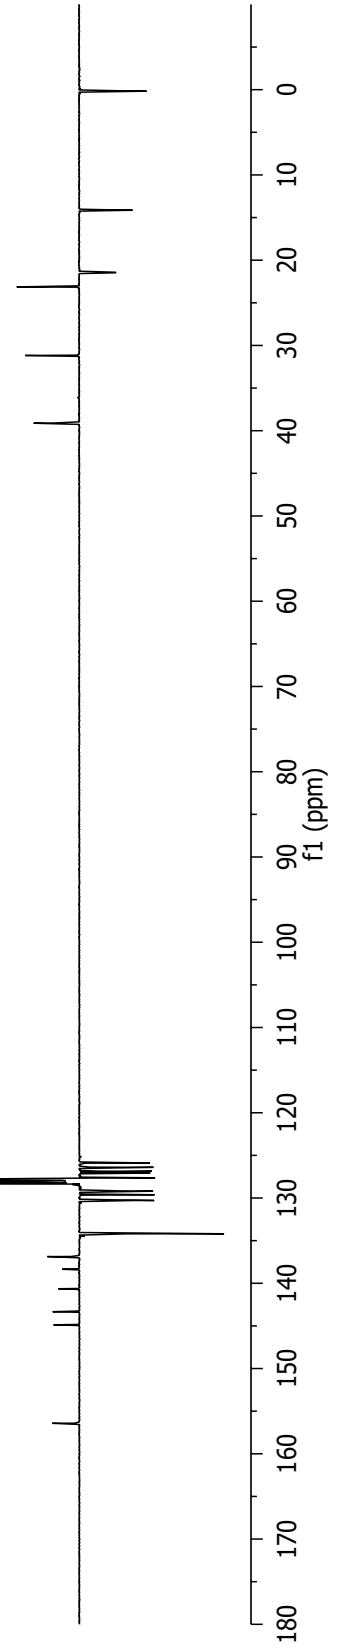

| Parameter                | Value            |
|--------------------------|------------------|
| 1 Title                  | SBK03259B.4.fid  |
| 2 Solvent                | C6D6             |
| 3 Temperature            | 300.0            |
| 4 Number of Scans        | 256              |
| 5 Receiver Gain          | 2050.0           |
| 6 Relaxation Delay       | 12.5000          |
| 7 Pulse Width            | 13.5000          |
| 8 Spectrometer Frequency | 119.26           |
| 9 Nucleus                | <sup>29</sup> Si |

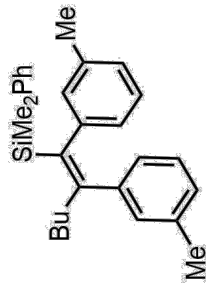

**8**

Chemical Formula: C<sub>28</sub>H<sub>34</sub>Si  
 Exact Mass: 398.2430  
 Molecular Weight: 398.6650

— -11.85

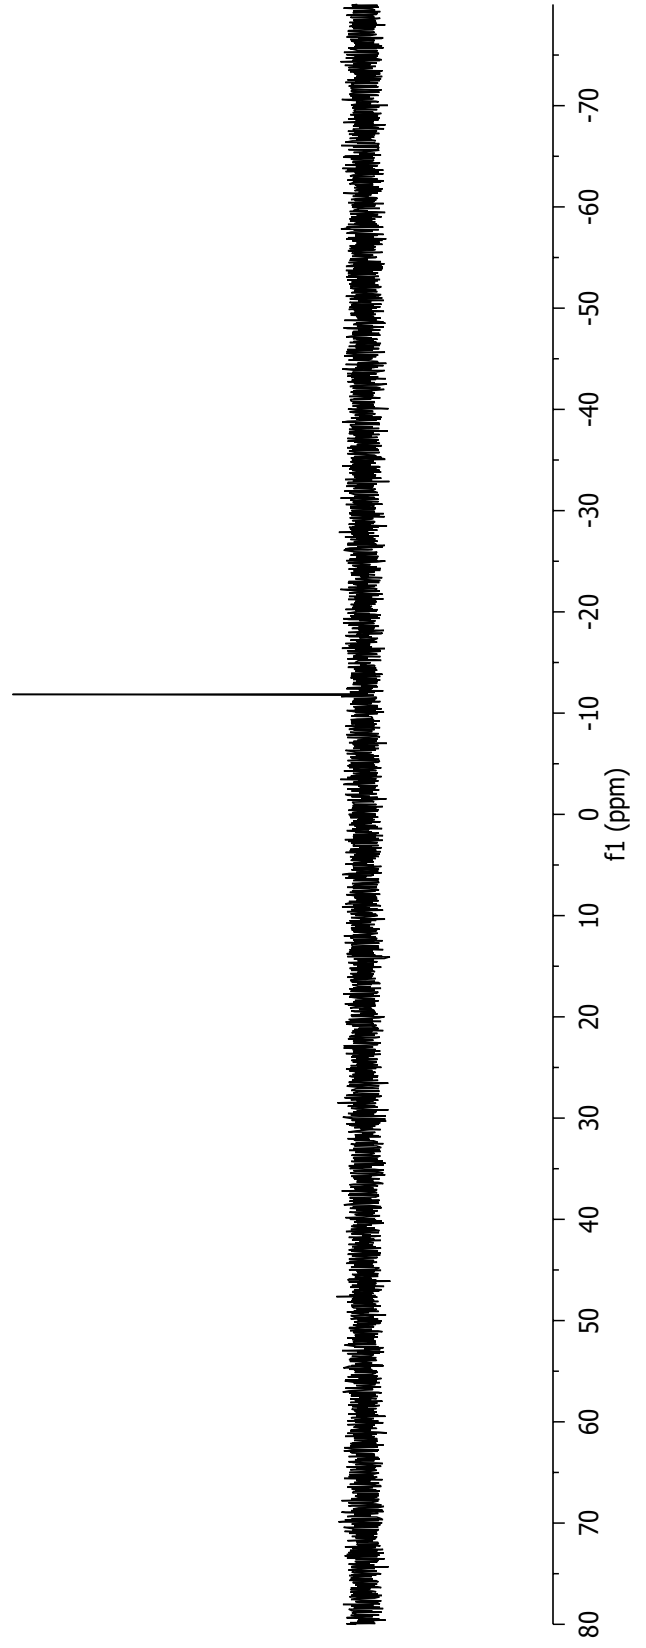

7.75 7.74 7.73 7.73 7.72 7.46 7.45 7.45 7.43 7.42 7.41 7.41 7.19 7.19 7.17 7.15 7.13 7.04 7.04 6.89 6.88 6.86 6.86 6.86 6.81 6.80 6.78 6.78 6.58 6.58 6.57 6.57 6.56 6.56 6.56 6.56 2.51 2.49 2.47 1.09 1.06 1.05 1.04 1.03 1.01 0.99 0.97 0.96 0.64 0.63 0.28

| Parameter                | Value                    |
|--------------------------|--------------------------|
| 1 Title                  | MFW02093col2C-dry2.1.fid |
| 2 Solvent                | CDCl3                    |
| 3 Temperature            | 298.2                    |
| 4 Number of Scans        | 16                       |
| 5 Receiver Gain          | 11.3                     |
| 6 Relaxation Delay       | 1.0000                   |
| 7 Pulse Width            | 15.0000                  |
| 8 Spectrometer Frequency | 400.13                   |
| 9 Nucleus                | <sup>1</sup> H           |

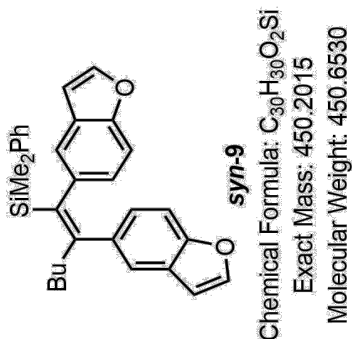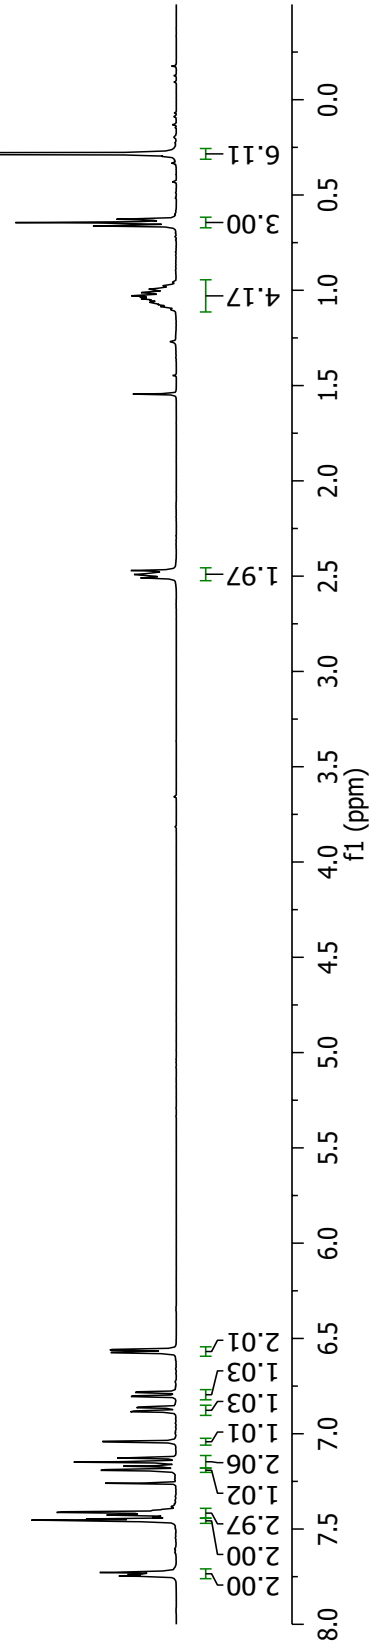

156.55  
153.21  
152.75  
144.72  
144.55  
140.42  
139.26  
138.13  
137.91  
133.91  
128.89  
127.97  
127.95  
126.80  
126.60  
126.15  
125.67  
121.23  
120.91  
110.22  
110.15  
106.68  
106.64

| Parameter                | Value                    |
|--------------------------|--------------------------|
| 1 Title                  | MFW02093col2C-dry2.2.fid |
| 2 Solvent                | CDCl3                    |
| 3 Temperature            | 298.2                    |
| 4 Number of Scans        | 256                      |
| 5 Receiver Gain          | 512.0                    |
| 6 Relaxation Delay       | 3.0000                   |
| 7 Pulse Width            | 10.7000                  |
| 8 Spectrometer Frequency | 100.62                   |
| 9 Nucleus                | <sup>13</sup> C          |

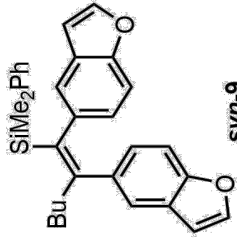

Chemical Formula: C<sub>30</sub>H<sub>30</sub>O<sub>2</sub>Si  
 Exact Mass: 450.2015  
 Molecular Weight: 450.6530

39.29  
30.80  
22.85  
0.04

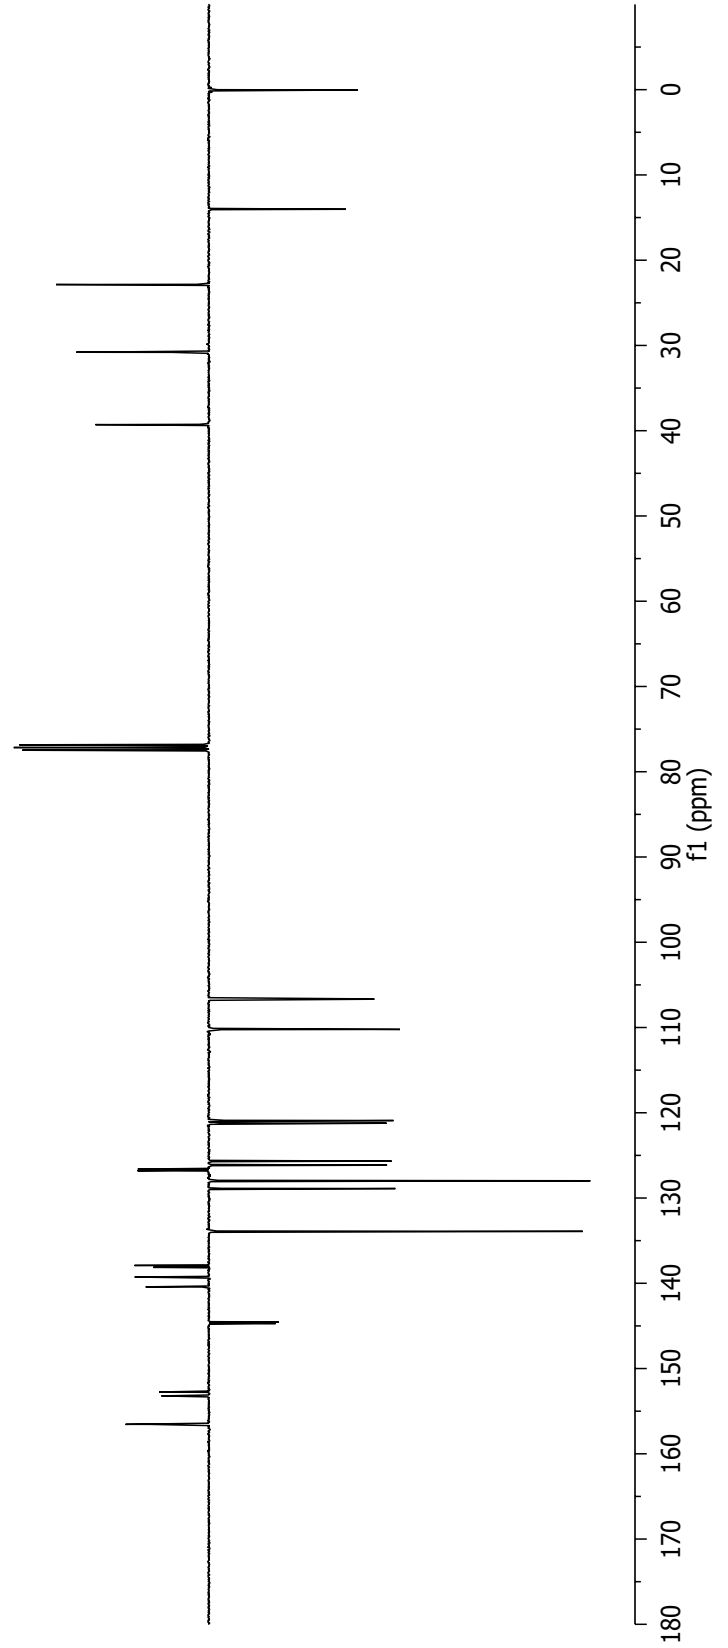

| Parameter                | Value                    |
|--------------------------|--------------------------|
| 1 Title                  | MFW02093co12C-dry3.2.fid |
| 2 Solvent                | CDCl3                    |
| 3 Temperature            | 300.0                    |
| 4 Number of Scans        | 254                      |
| 5 Receiver Gain          | 1030.0                   |
| 6 Relaxation Delay       | 12.5000                  |
| 7 Pulse Width            | 13.5000                  |
| 8 Spectrometer Frequency | 119.26                   |
| 9 Nucleus                | 29Si                     |

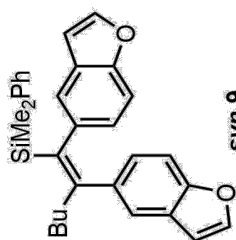

Chemical Formula: C<sub>30</sub>H<sub>30</sub>O<sub>2</sub>Si  
 Exact Mass: 450.2015  
 Molecular Weight: 450.6530

—11.53

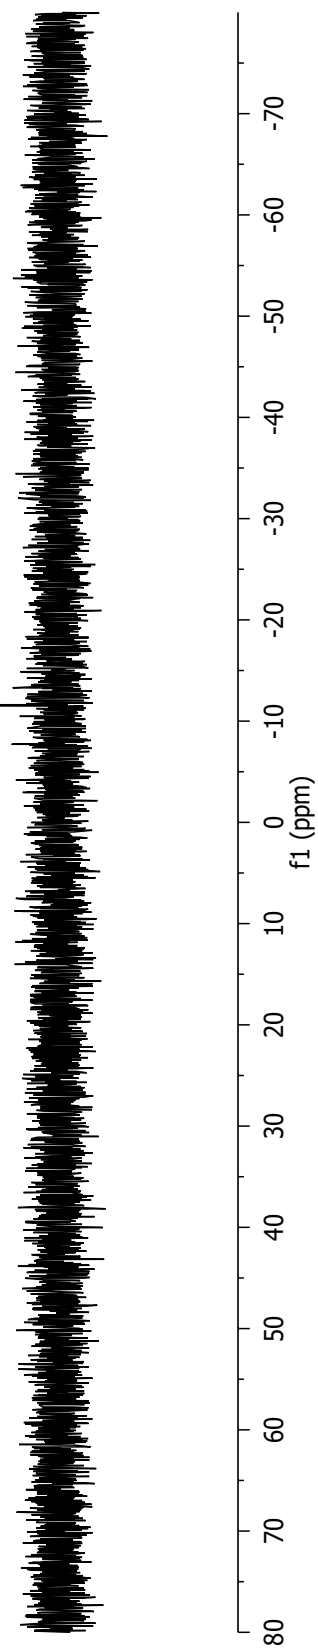



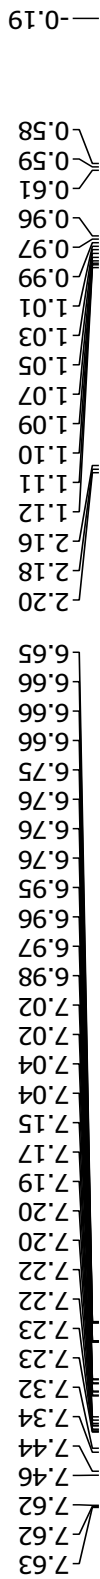

| Parameter                | Value                    |
|--------------------------|--------------------------|
| 1 Title                  | MFW02092col2F-dry2.1.fid |
| 2 Solvent                | CDCl3                    |
| 3 Temperature            | 298.2                    |
| 4 Number of Scans        | 16                       |
| 5 Receiver Gain          | 9.0                      |
| 6 Relaxation Delay       | 1.0000                   |
| 7 Pulse Width            | 15.0000                  |
| 8 Spectrometer Frequency | 400.13                   |
| 9 Nucleus                | <sup>1</sup> H           |

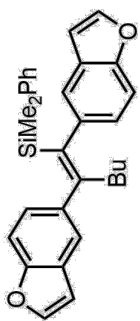

**anti-9**

Chemical Formula: C<sub>30</sub>H<sub>30</sub>O<sub>2</sub>Si

Exact Mass: 450.2015

Molecular Weight: 450.6530

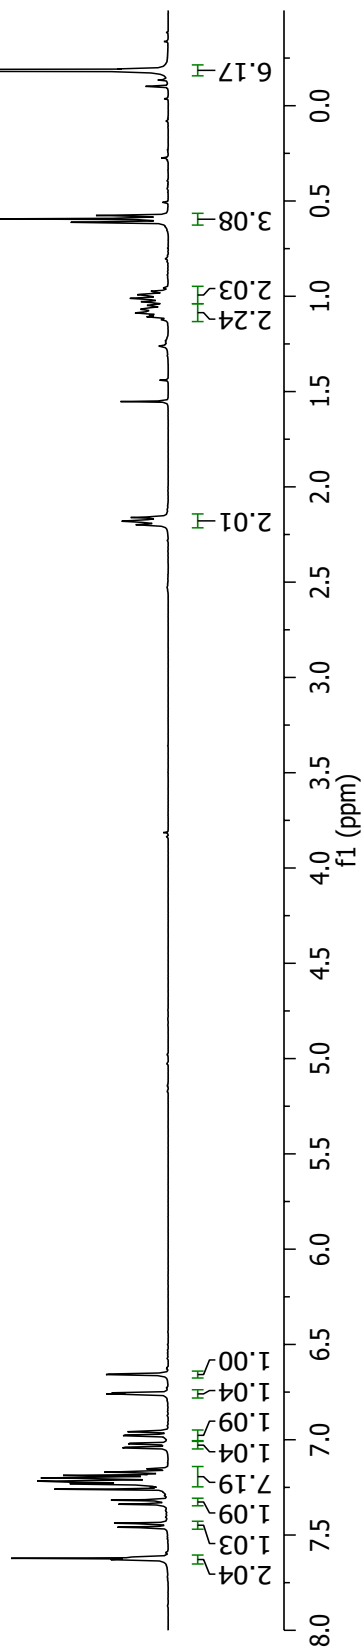

156.58  
154.16  
153.37  
145.17  
144.97  
140.42  
140.20  
139.09  
138.53  
133.85  
128.30  
127.29  
127.27  
126.79  
125.42  
125.37  
121.80  
120.59  
110.73  
110.53  
106.80  
106.78

| Parameter                | Value                    |
|--------------------------|--------------------------|
| 1 Title                  | MFW02092col2F-dry2.2.fid |
| 2 Solvent                | CDCl3                    |
| 3 Temperature            | 298.2                    |
| 4 Number of Scans        | 256                      |
| 5 Receiver Gain          | 512.0                    |
| 6 Relaxation Delay       | 3.0000                   |
| 7 Pulse Width            | 10.7000                  |
| 8 Spectrometer Frequency | 100.62                   |
| 9 Nucleus                | <sup>13</sup> C          |

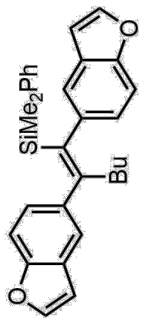

**anti-9**  
 Chemical Formula: C<sub>30</sub>H<sub>30</sub>O<sub>2</sub>Si  
 Exact Mass: 450.2015  
 Molecular Weight: 450.6530

37.29  
30.43  
22.61  
13.99  
-0.95

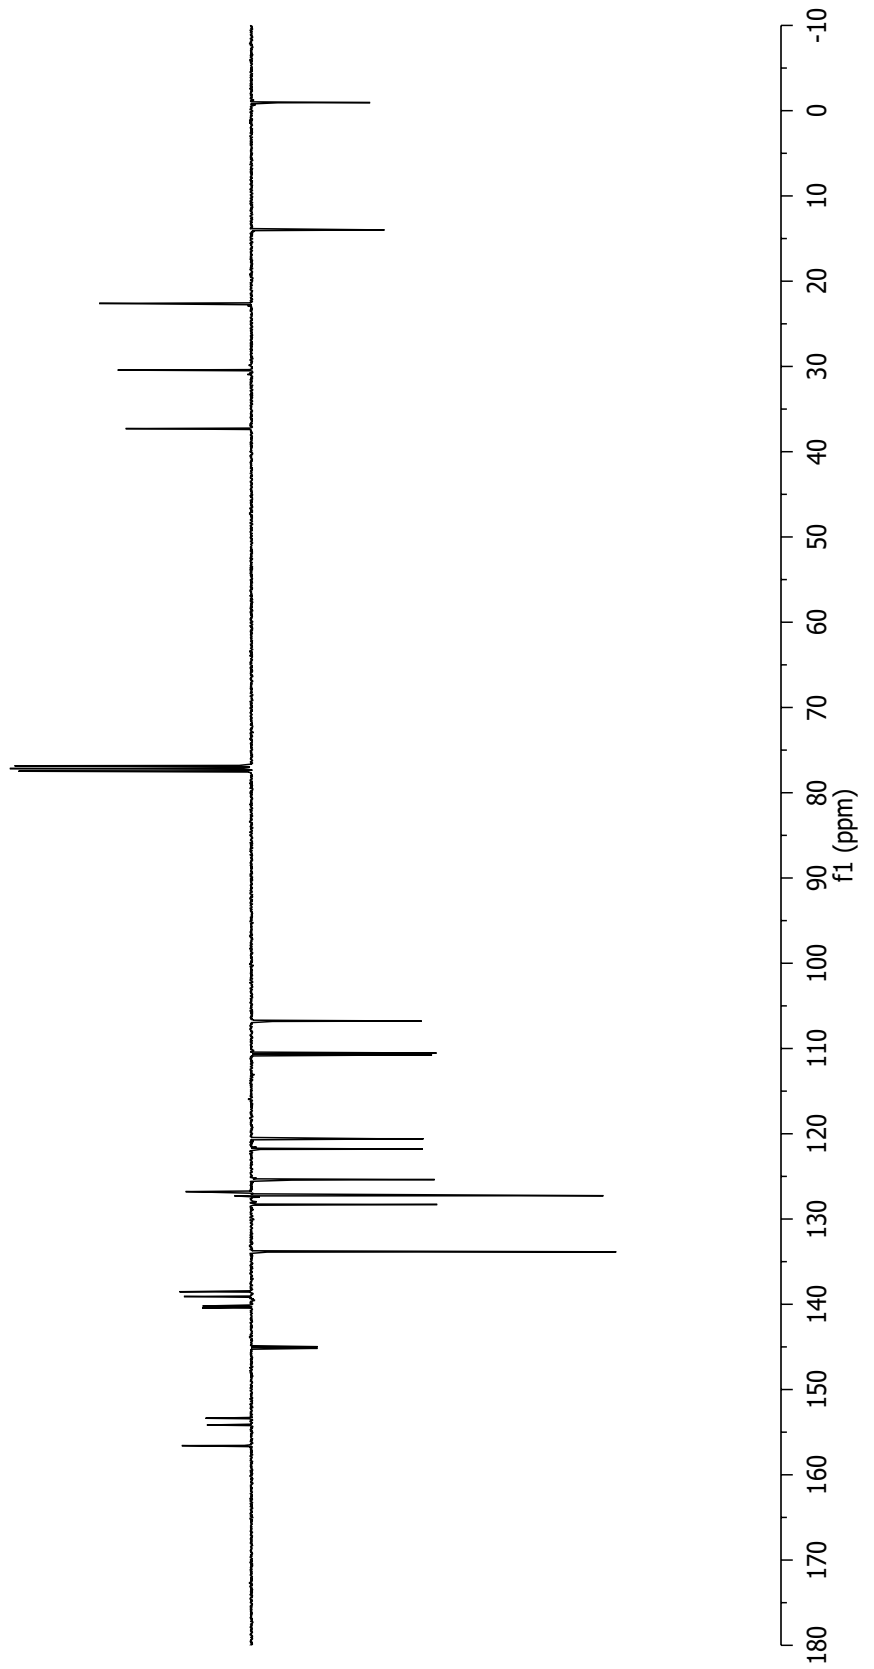

| Parameter                | Value                    |
|--------------------------|--------------------------|
| 1 Title                  | MFW02092co12F-dry3.2.fid |
| 2 Solvent                | CDCl3                    |
| 3 Temperature            | 300.0                    |
| 4 Number of Scans        | 254                      |
| 5 Receiver Gain          | 2050.0                   |
| 6 Relaxation Delay       | 12.5000                  |
| 7 Pulse Width            | 13.5000                  |
| 8 Spectrometer Frequency | 119.26                   |
| 9 Nucleus                | 29Si                     |

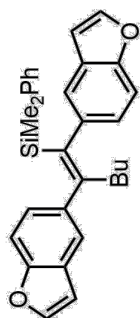

**anti-9**

Chemical Formula: C<sub>30</sub>H<sub>30</sub>O<sub>2</sub>Si

Exact Mass: 450.2015

Molecular Weight: 450.6530

-12.89

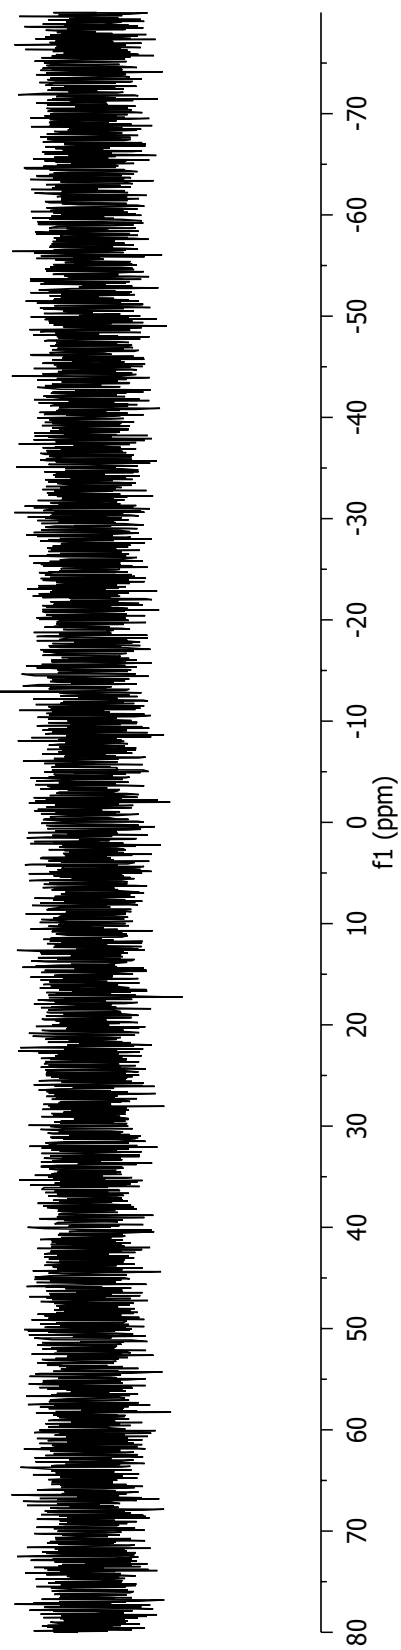

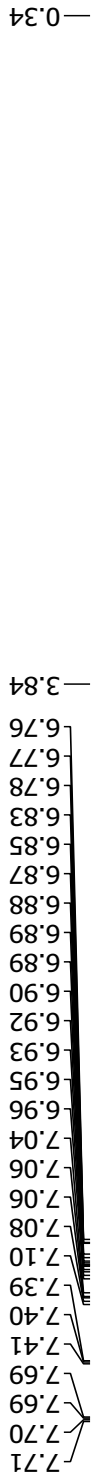

| Parameter                | Value               |
|--------------------------|---------------------|
| 1 Title                  | MFW02062col2A.3.fid |
| 2 Solvent                | CDCl3               |
| 3 Temperature            | 298.2               |
| 4 Number of Scans        | 16                  |
| 5 Receiver Gain          | 12.7                |
| 6 Relaxation Delay       | 1.0000              |
| 7 Pulse Width            | 15.0000             |
| 8 Spectrometer Frequency | 400.13              |
| 9 Nucleus                | 1H                  |

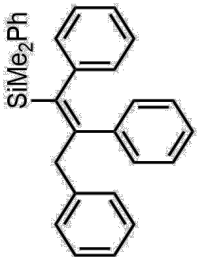

**10**

Chemical Formula: C<sub>29</sub>H<sub>28</sub>Si  
 Exact Mass: 404.1960  
 Molecular Weight: 404.6280

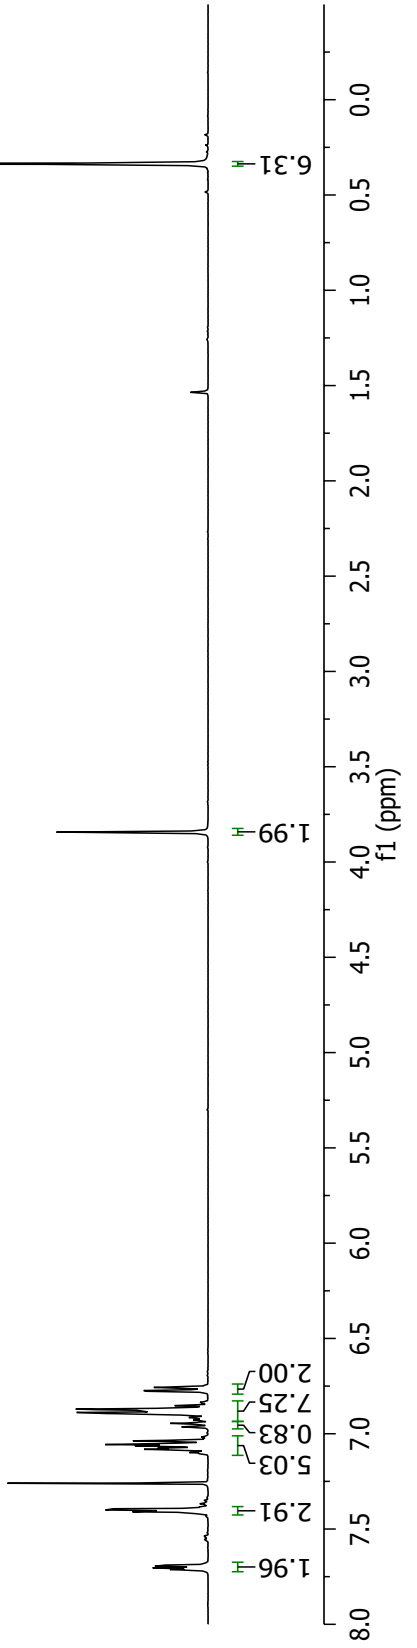

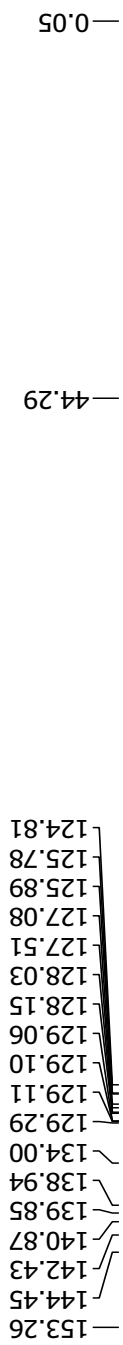

| Parameter                | Value               |
|--------------------------|---------------------|
| 1 Title                  | MFW02062col2A.4.fid |
| 2 Solvent                | CDCl3               |
| 3 Temperature            | 298.2               |
| 4 Number of Scans        | 256                 |
| 5 Receiver Gain          | 512.0               |
| 6 Relaxation Delay       | 3.0000              |
| 7 Pulse Width            | 10.7000             |
| 8 Spectrometer Frequency | 100.62              |
| 9 Nucleus                | 13C                 |

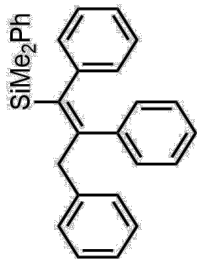

**10**

Chemical Formula: C<sub>29</sub>H<sub>28</sub>Si  
 Exact Mass: 404.1960  
 Molecular Weight: 404.6280

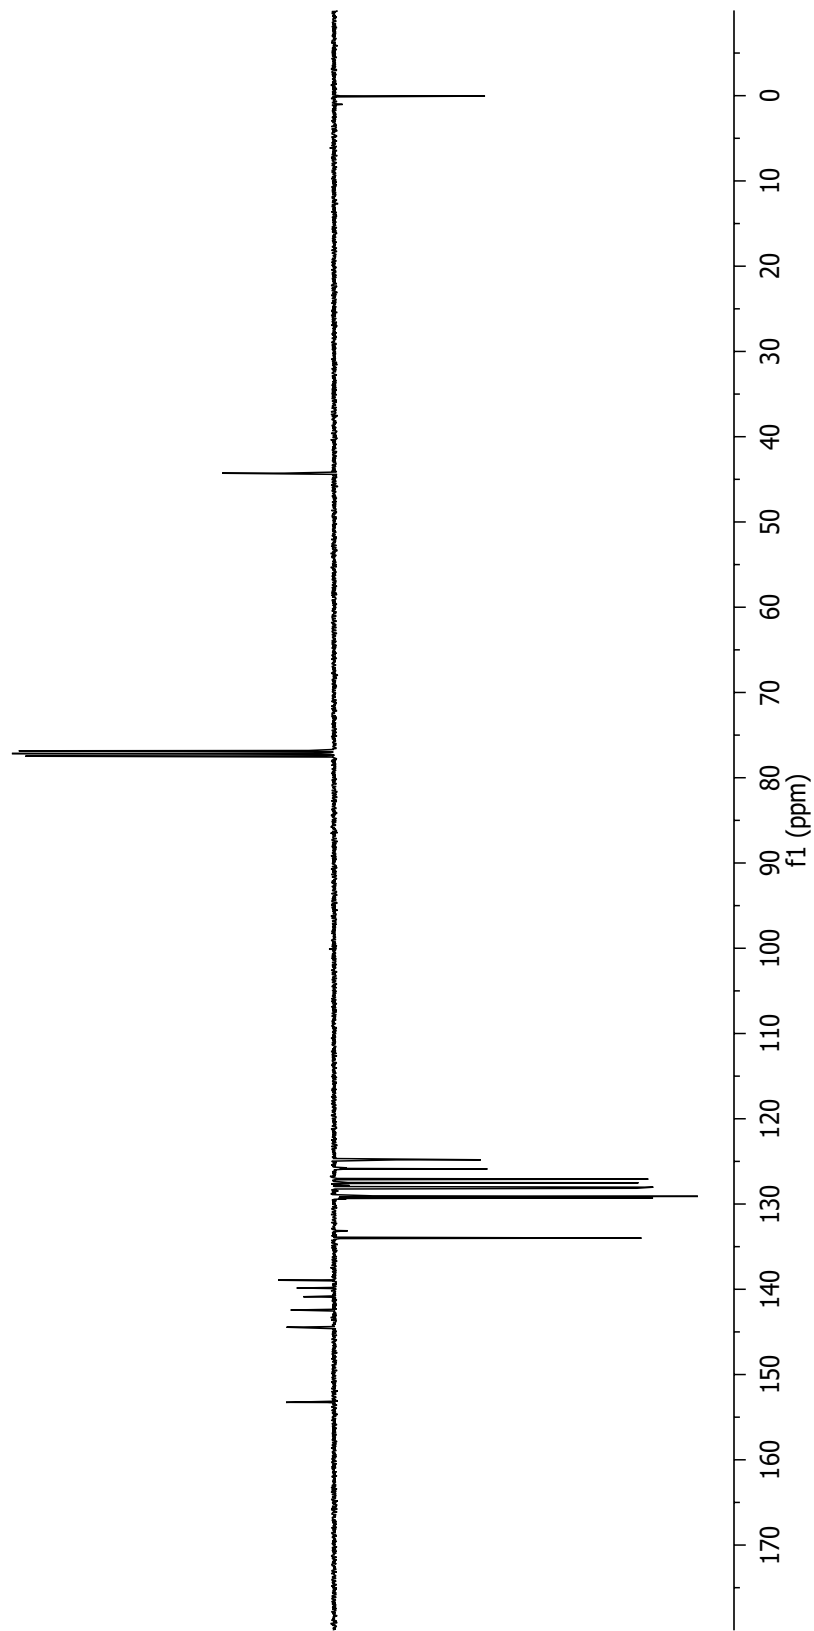

11.38

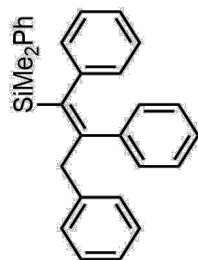

**10**

Chemical Formula: C<sub>29</sub>H<sub>28</sub>Si  
Exact Mass: 404.1960  
Molecular Weight: 404.6280

| Parameter                | Value                  |
|--------------------------|------------------------|
| 1 Title                  | MFW02062col2A-Si.2.fid |
| 2 Solvent                | CDCl <sub>3</sub>      |
| 3 Temperature            | 300.0                  |
| 4 Number of Scans        | 128                    |
| 5 Receiver Gain          | 1030.0                 |
| 6 Relaxation Delay       | 12.5000                |
| 7 Pulse Width            | 13.5000                |
| 8 Spectrometer Frequency | 119.26                 |
| 9 Nucleus                | <sup>29</sup> Si       |

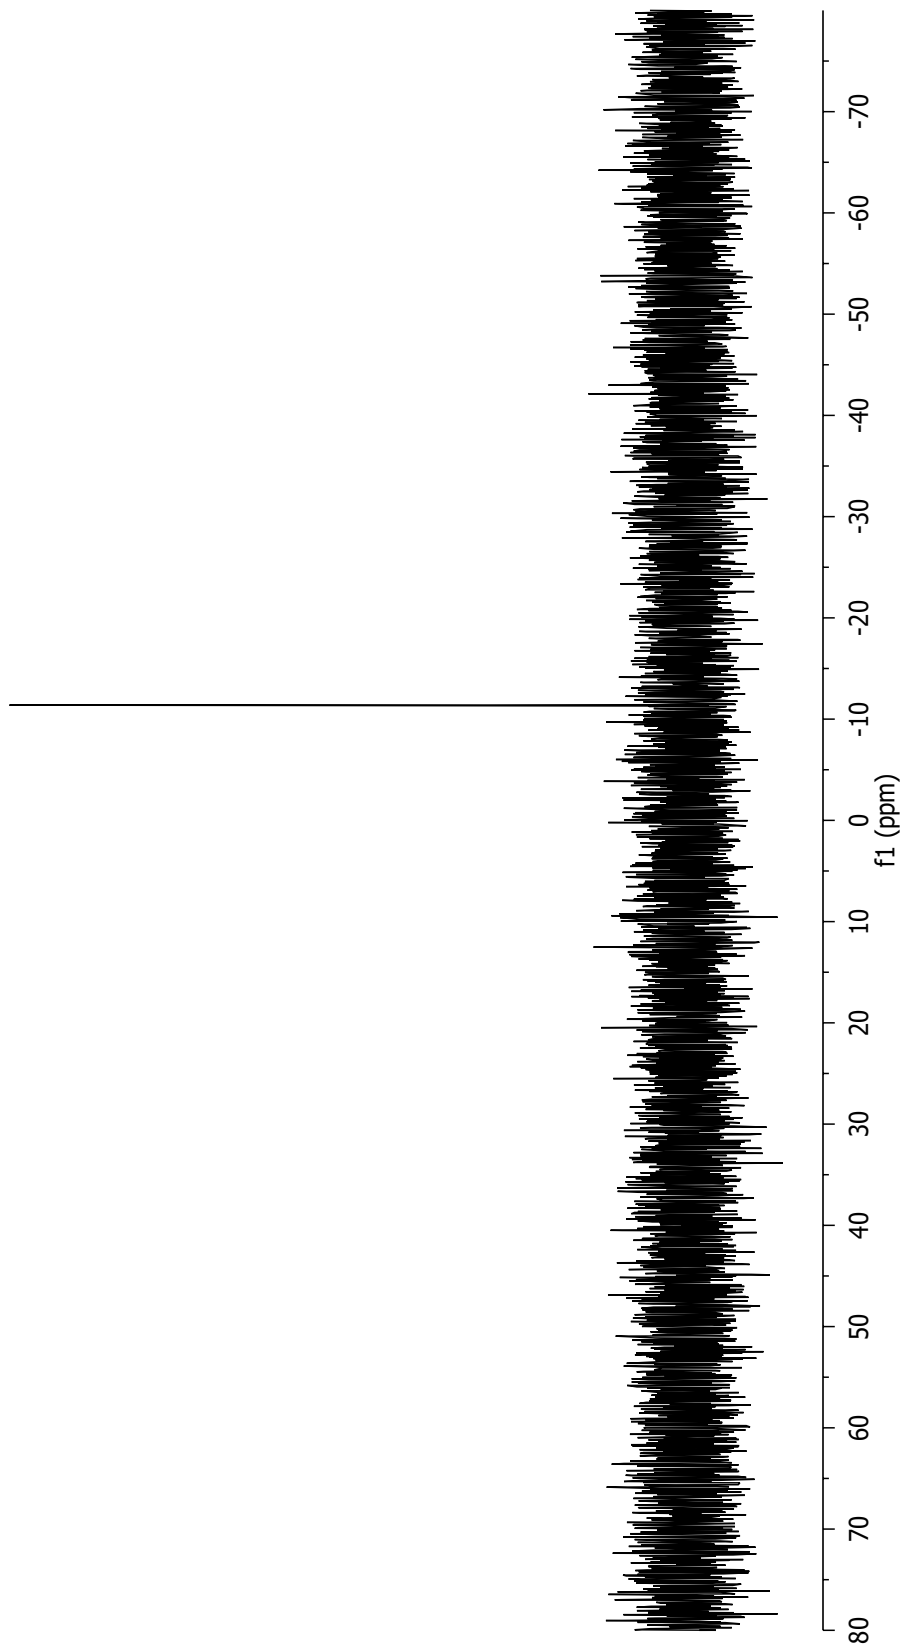

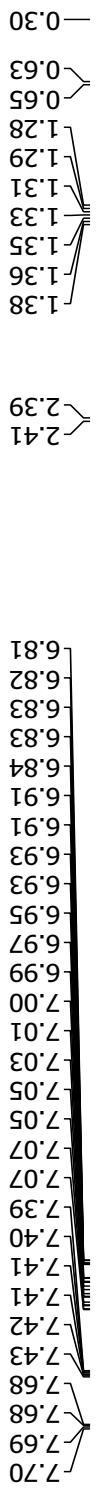

| Parameter                | Value           |
|--------------------------|-----------------|
| 1 Title                  | SBK032588.1.fid |
| 2 Solvent                | CDCl3           |
| 3 Temperature            | 298.2           |
| 4 Number of Scans        | 16              |
| 5 Receiver Gain          | 9.0             |
| 6 Relaxation Delay       | 1.0000          |
| 7 Pulse Width            | 15.0000         |
| 8 Spectrometer Frequency | 400.13          |
| 9 Nucleus                | 1H              |

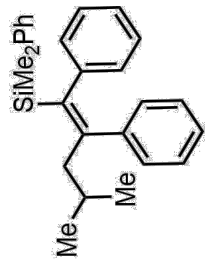

**11**  
 Chemical Formula: C<sub>26</sub>H<sub>30</sub>Si  
 Exact Mass: 370.2117  
 Molecular Weight: 370.6110

154.79  
144.73  
142.78  
140.30  
139.75  
134.06  
129.46  
128.91  
128.73  
127.95  
127.41  
127.26  
125.75  
124.57

| Parameter                | Value           |
|--------------------------|-----------------|
| 1 Title                  | SBK03258B.2.fid |
| 2 Solvent                | CDCl3           |
| 3 Temperature            | 298.2           |
| 4 Number of Scans        | 1024            |
| 5 Receiver Gain          | 512.0           |
| 6 Relaxation Delay       | 3.0000          |
| 7 Pulse Width            | 10.7000         |
| 8 Spectrometer Frequency | 100.62          |
| 9 Nucleus                | 13C             |

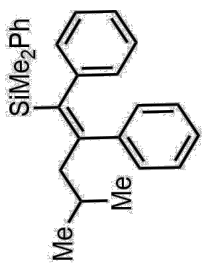

11

Chemical Formula: C<sub>26</sub>H<sub>30</sub>Si  
 Exact Mass: 370.2117  
 Molecular Weight: 370.6110

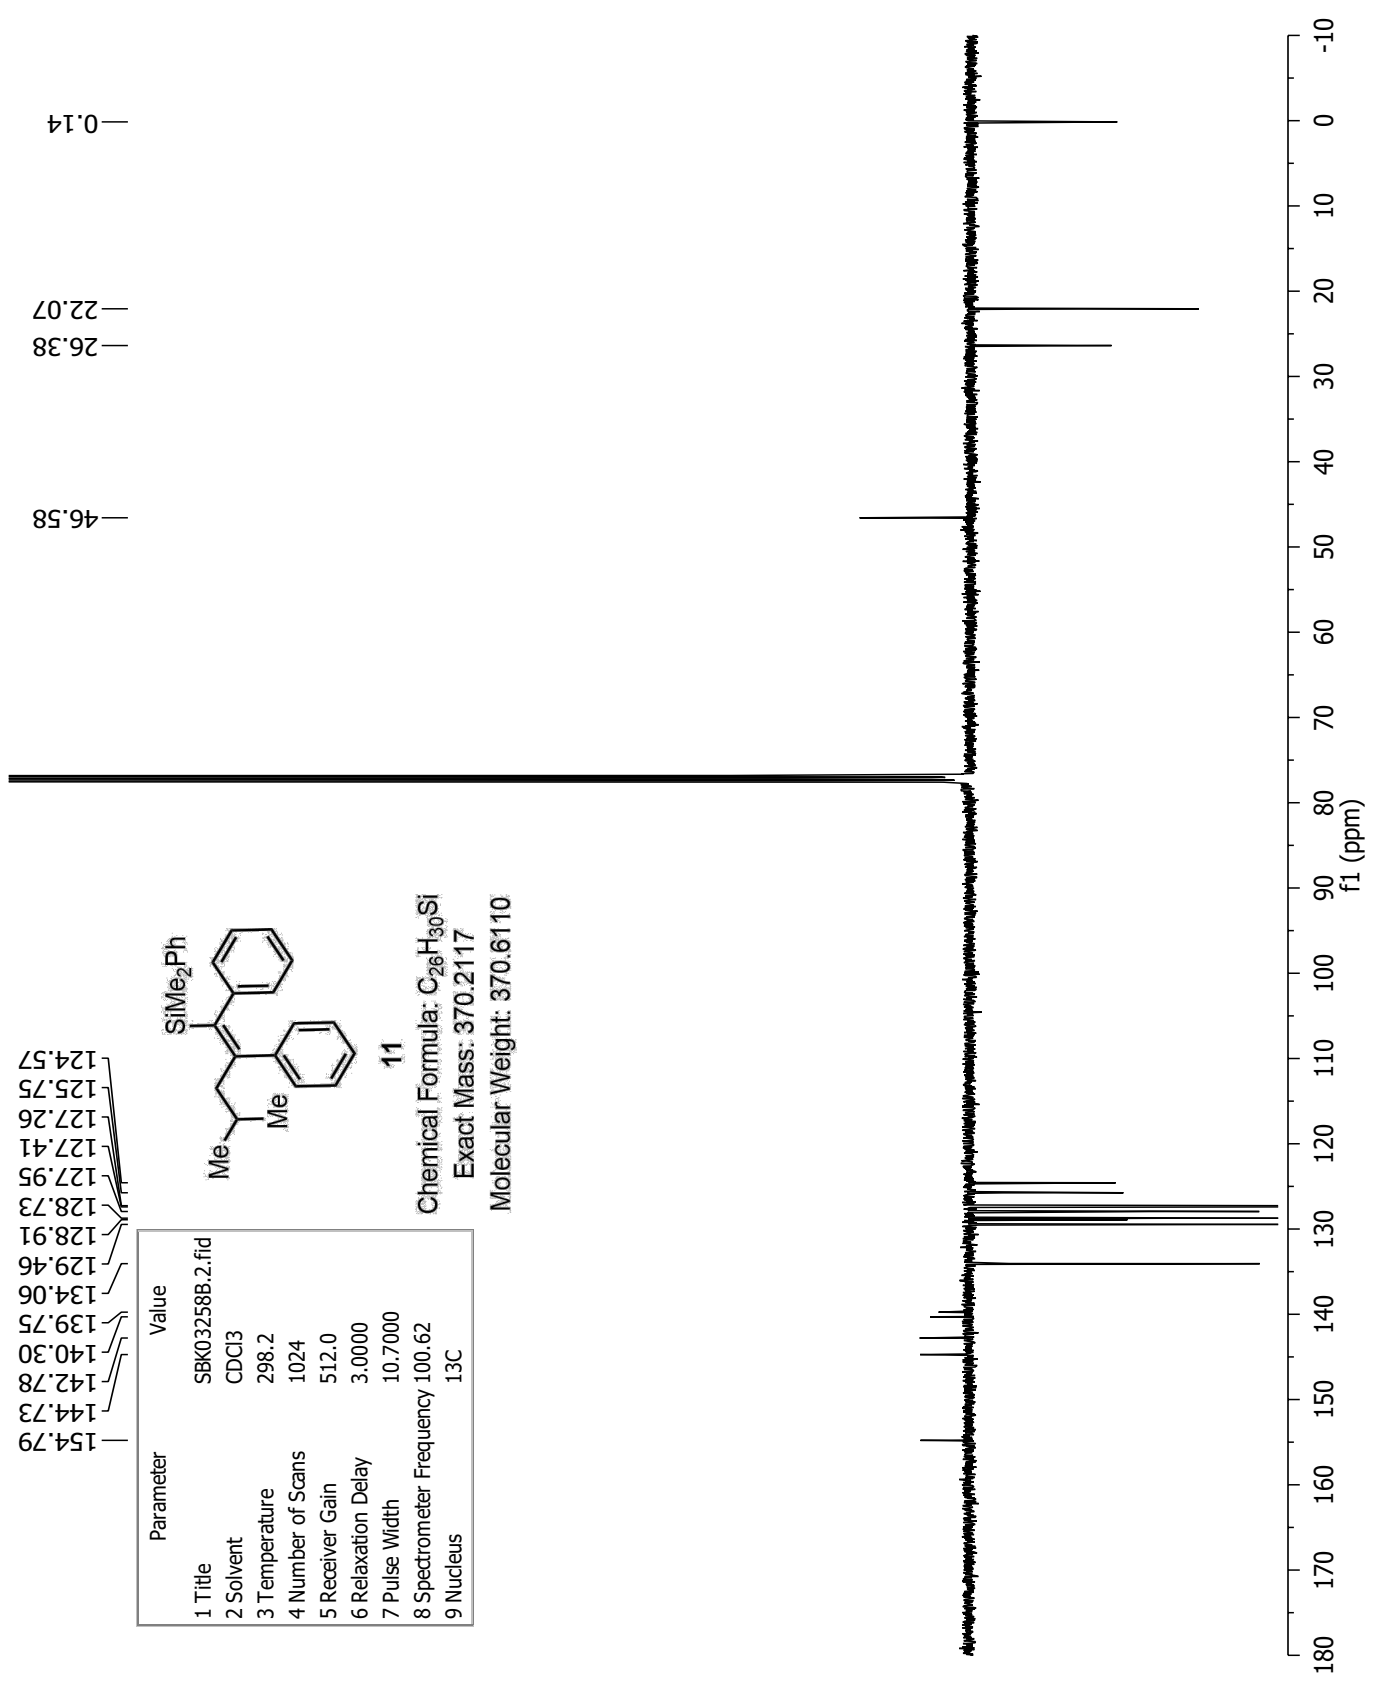



—11.95

| Parameter                | Value              |
|--------------------------|--------------------|
| 1 Title                  | SBK032588-Si.1.fid |
| 2 Solvent                | CDCl3              |
| 3 Temperature            | 300.0              |
| 4 Number of Scans        | 256                |
| 5 Receiver Gain          | 2050.0             |
| 6 Relaxation Delay       | 12.5000            |
| 7 Pulse Width            | 13.5000            |
| 8 Spectrometer Frequency | 119.26             |
| 9 Nucleus                | 29Si               |

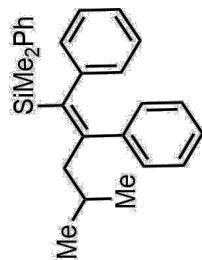

11

Chemical Formula: C<sub>26</sub>H<sub>30</sub>Si  
Exact Mass: 370.2117  
Molecular Weight: 370.6110

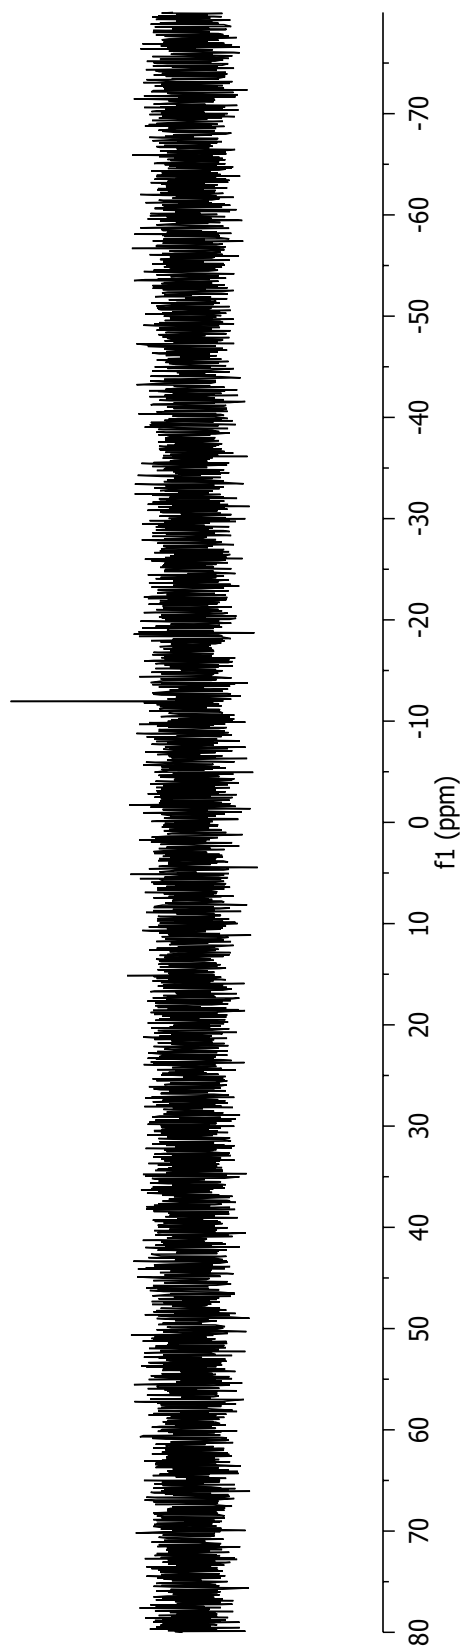

7.62  
7.61  
7.61  
7.60  
7.38  
7.38  
7.37  
6.84  
6.83  
6.82  
6.81  
6.76  
6.74  
6.74  
6.72  
6.71  
6.68

| Parameter                | Value           |
|--------------------------|-----------------|
| 1 Title                  | SBK03276C.1.fid |
| 2 Solvent                | CDCl3           |
| 3 Temperature            | 300.0           |
| 4 Number of Scans        | 16              |
| 5 Receiver Gain          | 203.0           |
| 6 Relaxation Delay       | 1.0000          |
| 7 Pulse Width            | 12.2500         |
| 8 Spectrometer Frequency | 400.15          |
| 9 Nucleus                | 1H              |

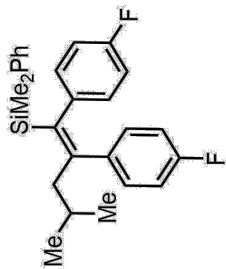

**12**

Chemical Formula: C<sub>26</sub>H<sub>28</sub>F<sub>2</sub>Si  
 Exact Mass: 406.1928  
 Molecular Weight: 406.5918

1.35  
1.34  
1.32  
1.30  
1.29  
1.27  
0.63  
0.61  
2.37  
2.35

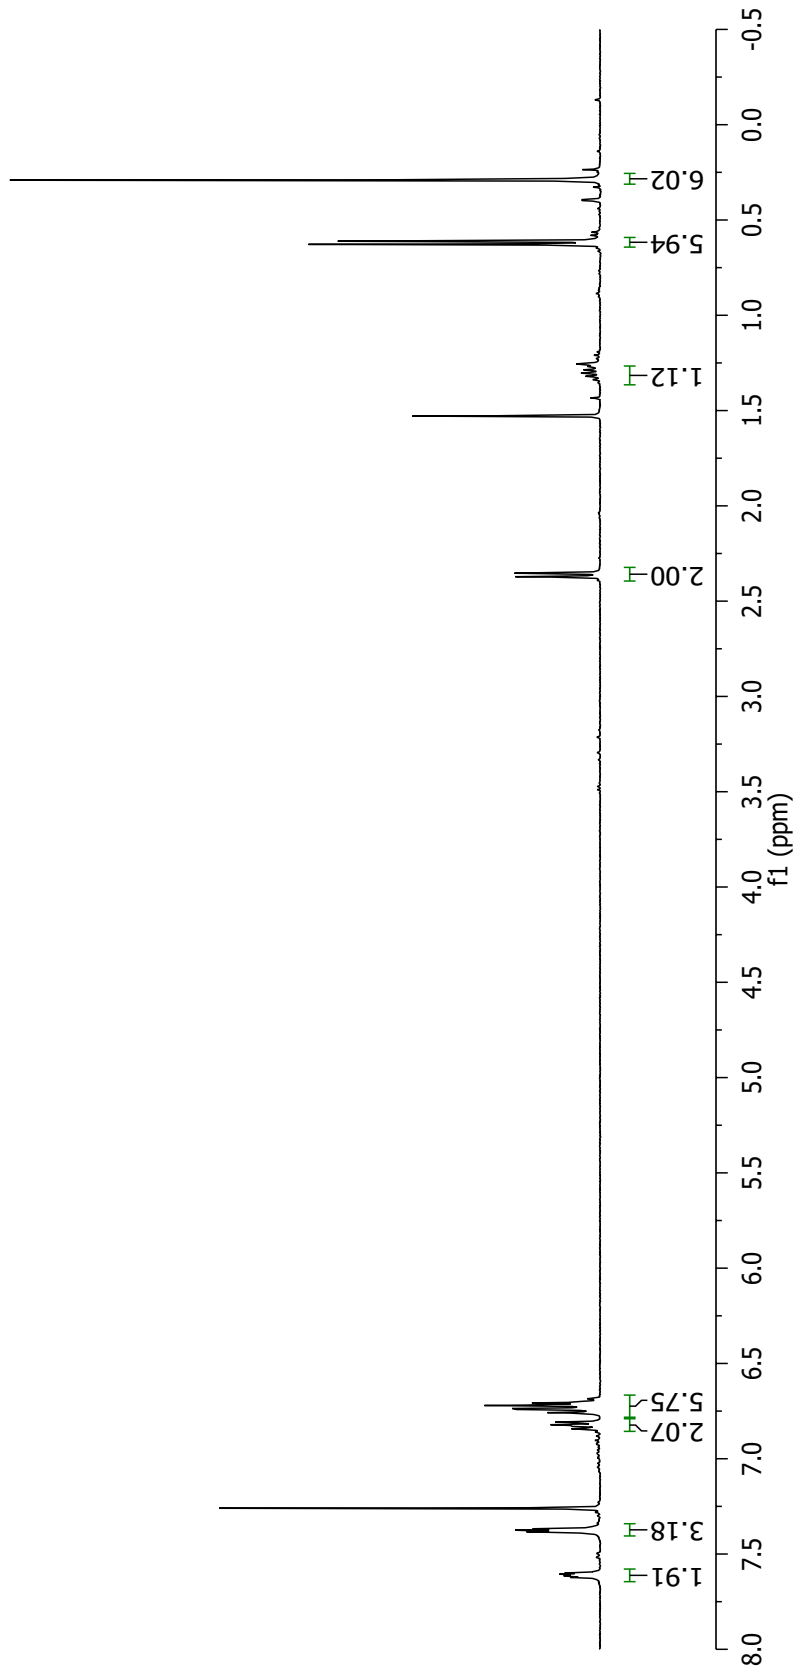

162.15  
161.70  
159.72  
159.29  
154.52  
140.37  
140.34  
139.81  
139.47  
138.48  
138.45

| Parameter                | Value           |
|--------------------------|-----------------|
| 1 Title                  | SBK03276C.3.fid |
| 2 Solvent                | CDCl3           |
| 3 Temperature            | 298.2           |
| 4 Number of Scans        | 1024            |
| 5 Receiver Gain          | 512.0           |
| 6 Relaxation Delay       | 3.0000          |
| 7 Pulse Width            | 10.7000         |
| 8 Spectrometer Frequency | 100.62          |
| 9 Nucleus                | <sup>13</sup> C |

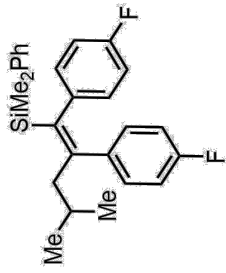

**12**

Chemical Formula:  $C_{26}H_{28}F_2Si$   
 Exact Mass: 406.1928  
 Molecular Weight: 406.5918

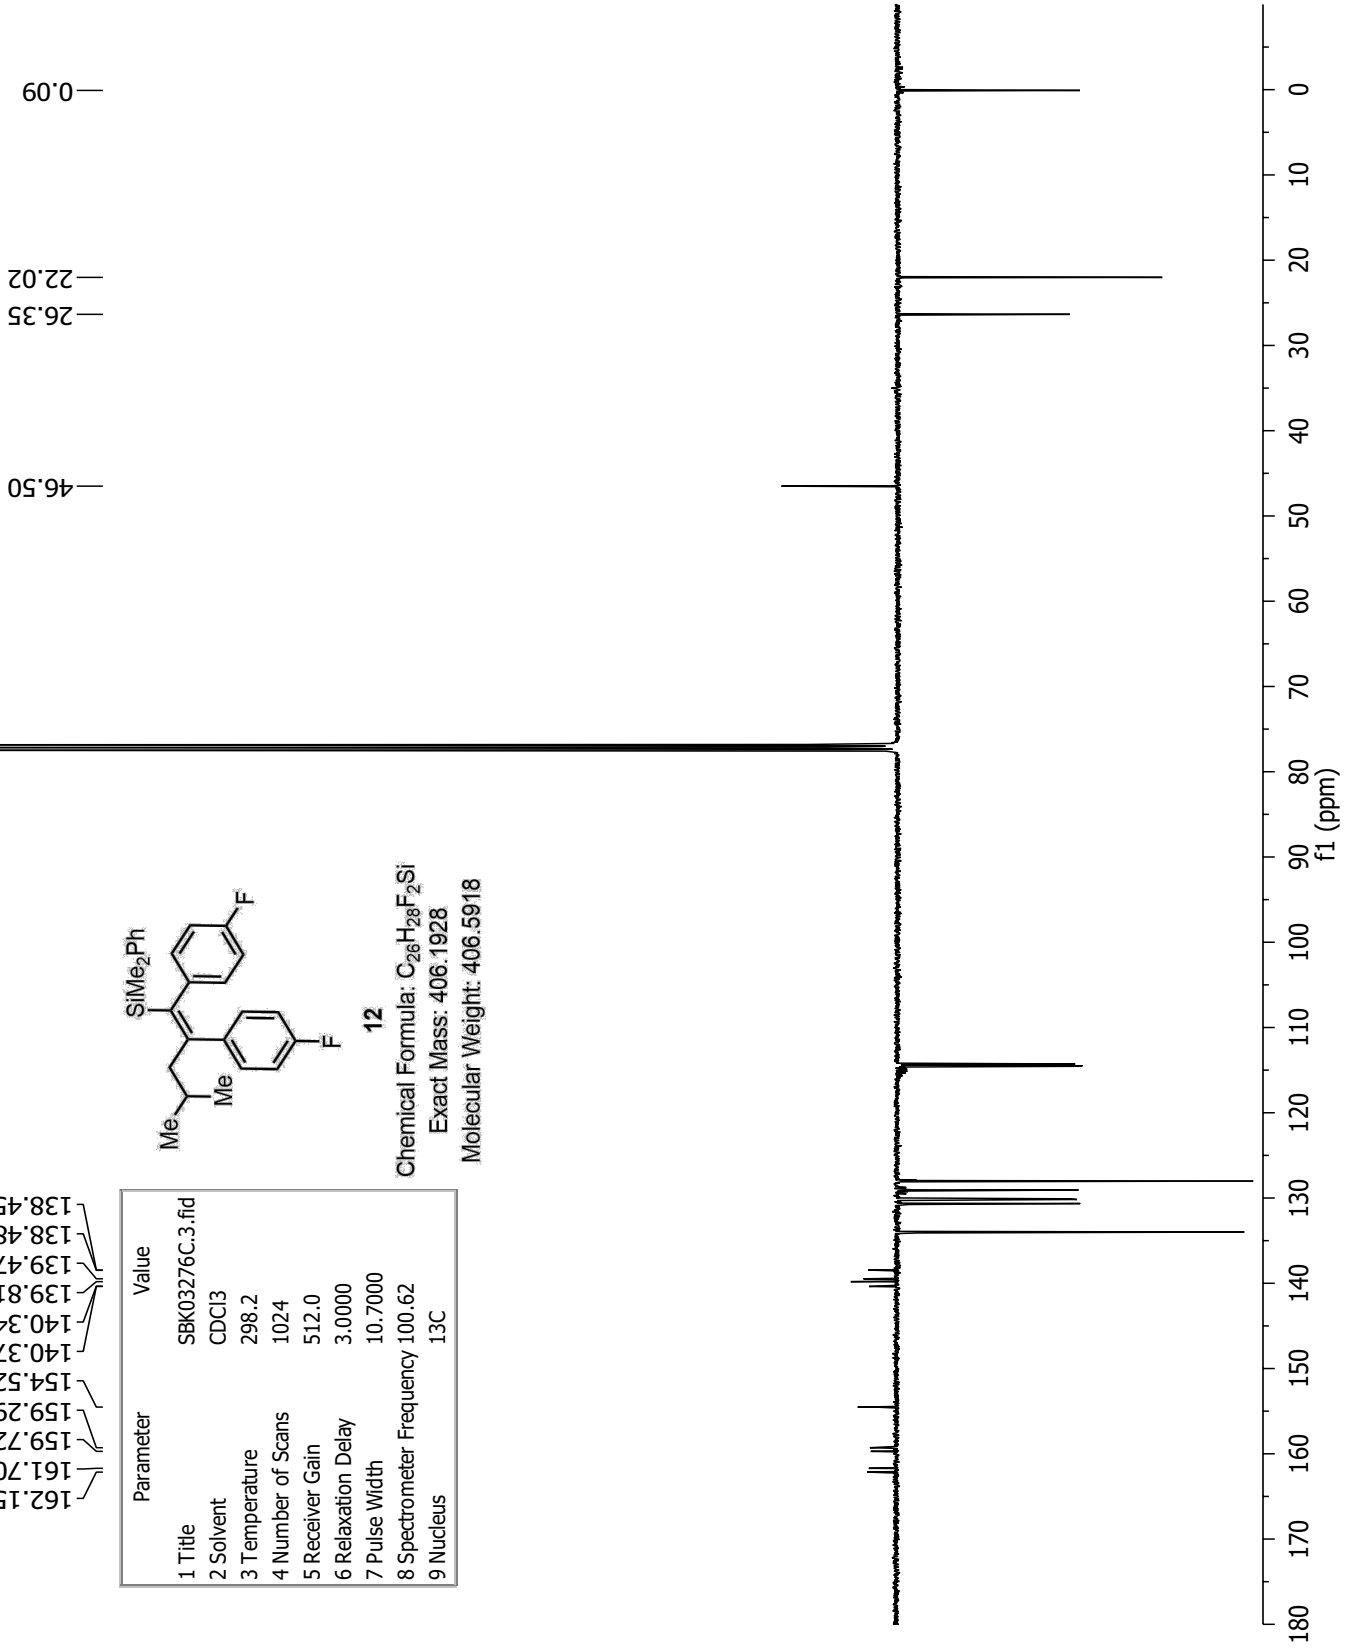

| Parameter                | Value              |
|--------------------------|--------------------|
| 1 Title                  | SBK03276C-Si.1.fid |
| 2 Solvent                | CDCl3              |
| 3 Temperature            | 300.0              |
| 4 Number of Scans        | 256                |
| 5 Receiver Gain          | 1030.0             |
| 6 Relaxation Delay       | 12.5000            |
| 7 Pulse Width            | 13.5000            |
| 8 Spectrometer Frequency | 119.26             |
| 9 Nucleus                | 29Si               |

—11.80

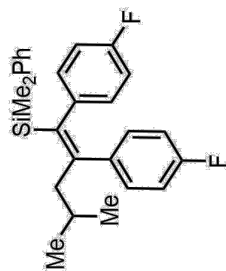

**12**

Chemical Formula: C<sub>26</sub>H<sub>28</sub>F<sub>2</sub>Si  
 Exact Mass: 406.1928  
 Molecular Weight: 406.5918

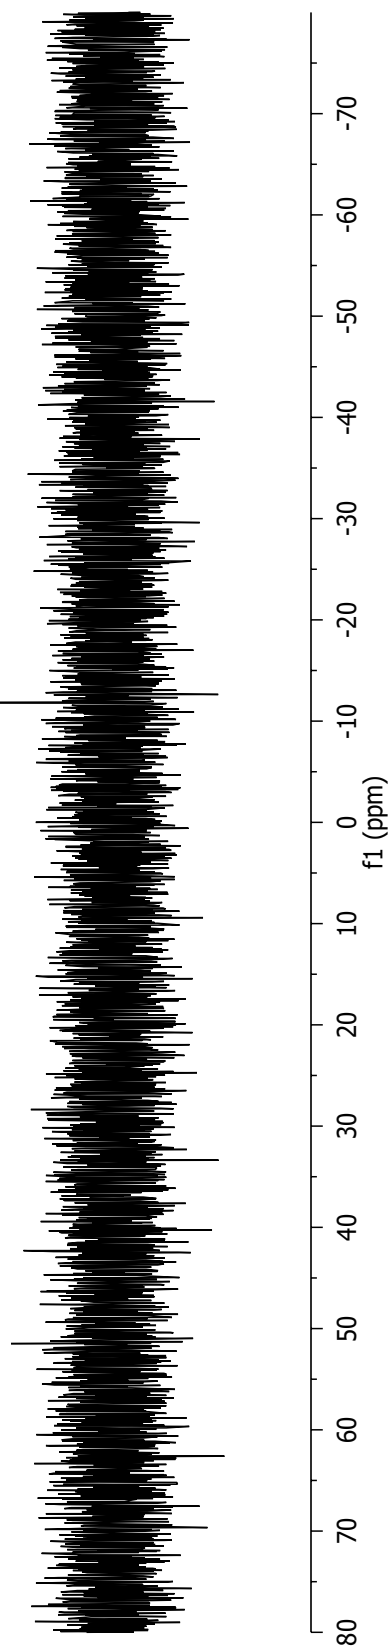

| Parameter                | Value          |
|--------------------------|----------------|
| 1 Title                  | SBK03276.1.fid |
| 2 Solvent                | CDCl3          |
| 3 Temperature            | 300.0          |
| 4 Number of Scans        | 16             |
| 5 Receiver Gain          | 322.0          |
| 6 Relaxation Delay       | 3.0000         |
| 7 Pulse Width            | 11.4000        |
| 8 Spectrometer Frequency | 564.81         |
| 9 Nucleus                | 19F            |

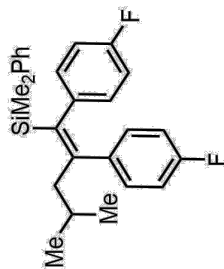

**12**

Chemical Formula: C<sub>26</sub>H<sub>28</sub>F<sub>2</sub>Si  
 Exact Mass: 406.1928  
 Molecular Weight: 406.5918

~116.57  
 ~118.60

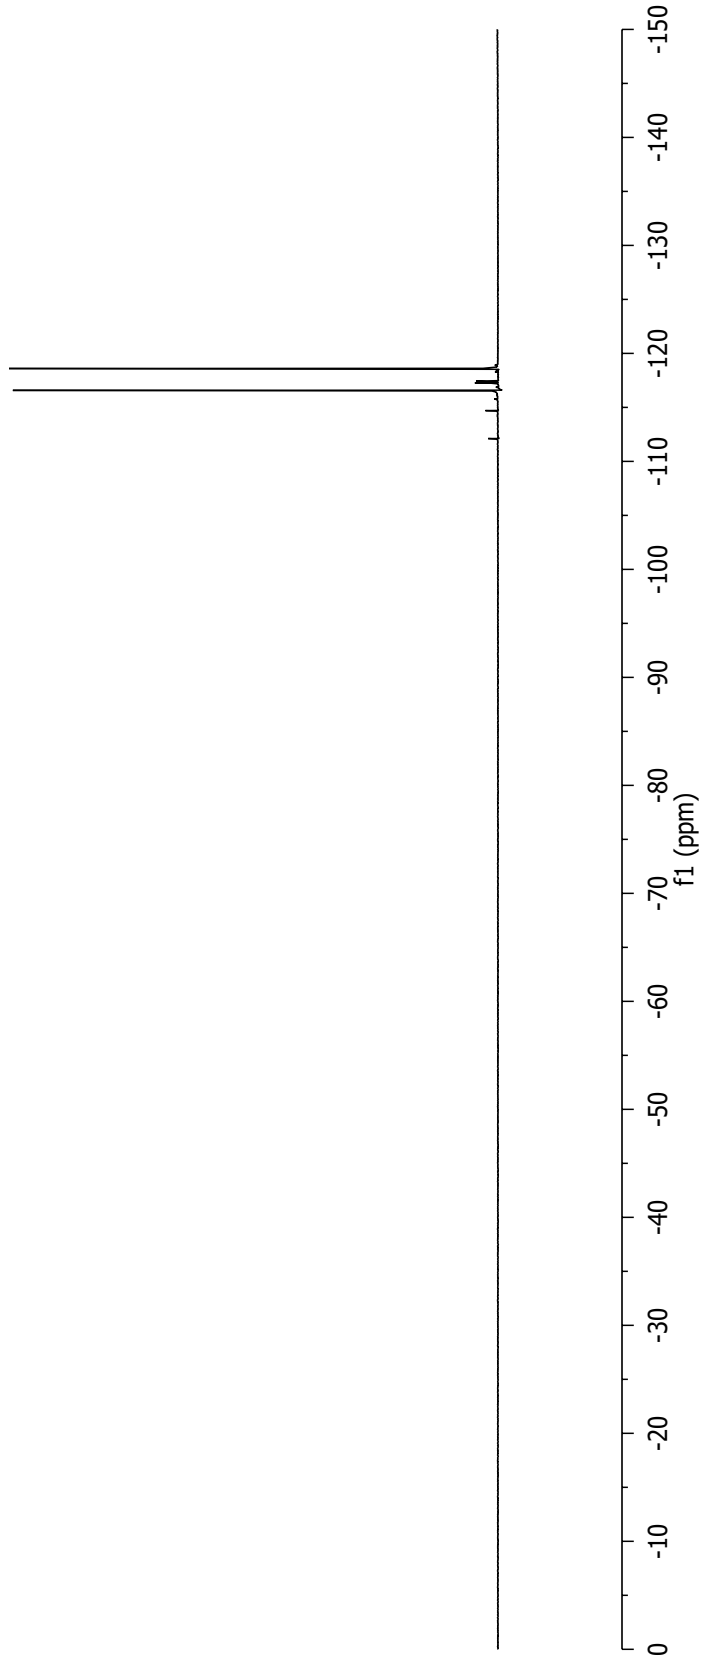

7.73  
7.72  
7.71  
7.71  
7.44  
7.43  
7.42  
7.42  
7.09  
7.08  
7.07  
7.07  
7.06  
7.05  
7.04  
7.02  
7.00  
6.99  
6.97  
6.95  
6.95  
6.94  
6.93  
6.86  
6.85  
6.84  
5.27  
5.26  
5.24  
5.22  
5.18  
5.18  
5.16  
5.16  
5.15  
5.14  
2.47  
2.45  
2.45  
2.44  
2.43  
1.69  
1.68  
1.66  
1.64  
1.59  
1.57  
1.18  
1.16  
1.16  
1.15  
1.14  
1.13  
1.11  
0.31

| Parameter                | Value                     |
|--------------------------|---------------------------|
| 1 Title                  | MFW02088co12E-dry2-.1.fid |
| 2 Solvent                | CDCl3                     |
| 3 Temperature            | 298.2                     |
| 4 Number of Scans        | 16                        |
| 5 Receiver Gain          | 10.1                      |
| 6 Relaxation Delay       | 1.0000                    |
| 7 Pulse Width            | 15.0000                   |
| 8 Spectrometer Frequency | 400.13                    |
| 9 Nucleus                | <sup>1</sup> H            |

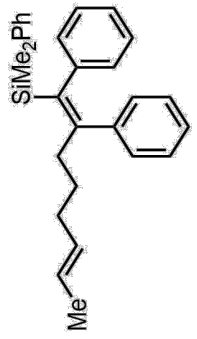

**13**  
 Chemical Formula: C<sub>28</sub>H<sub>32</sub>Si  
 Exact Mass: 396.2273  
 Molecular Weight: 396.6490

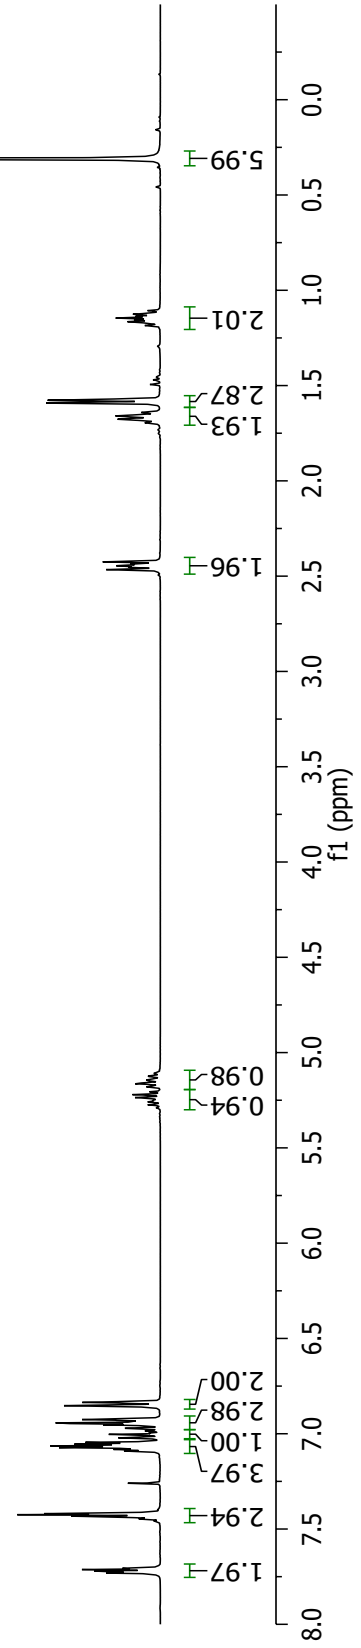

155.90  
144.52  
143.00  
140.26  
138.37  
133.89  
131.14  
129.33  
128.93  
128.78  
127.98  
127.42  
127.33  
125.83  
125.00  
124.60

| Parameter                | Value                    |
|--------------------------|--------------------------|
| 1 Title                  | MFW02088col2E-dry2.2.fid |
| 2 Solvent                | CDCl3                    |
| 3 Temperature            | 298.2                    |
| 4 Number of Scans        | 256                      |
| 5 Receiver Gain          | 512.0                    |
| 6 Relaxation Delay       | 3.0000                   |
| 7 Pulse Width            | 10.7000                  |
| 8 Spectrometer Frequency | 100.62                   |
| 9 Nucleus                | <sup>13</sup> C          |

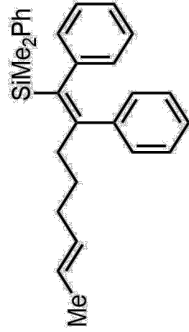

13

Chemical Formula: C<sub>28</sub>H<sub>32</sub>Si  
Exact Mass: 396.2273  
Molecular Weight: 396.6490

38.41  
32.67  
28.49  
18.01  
-0.08

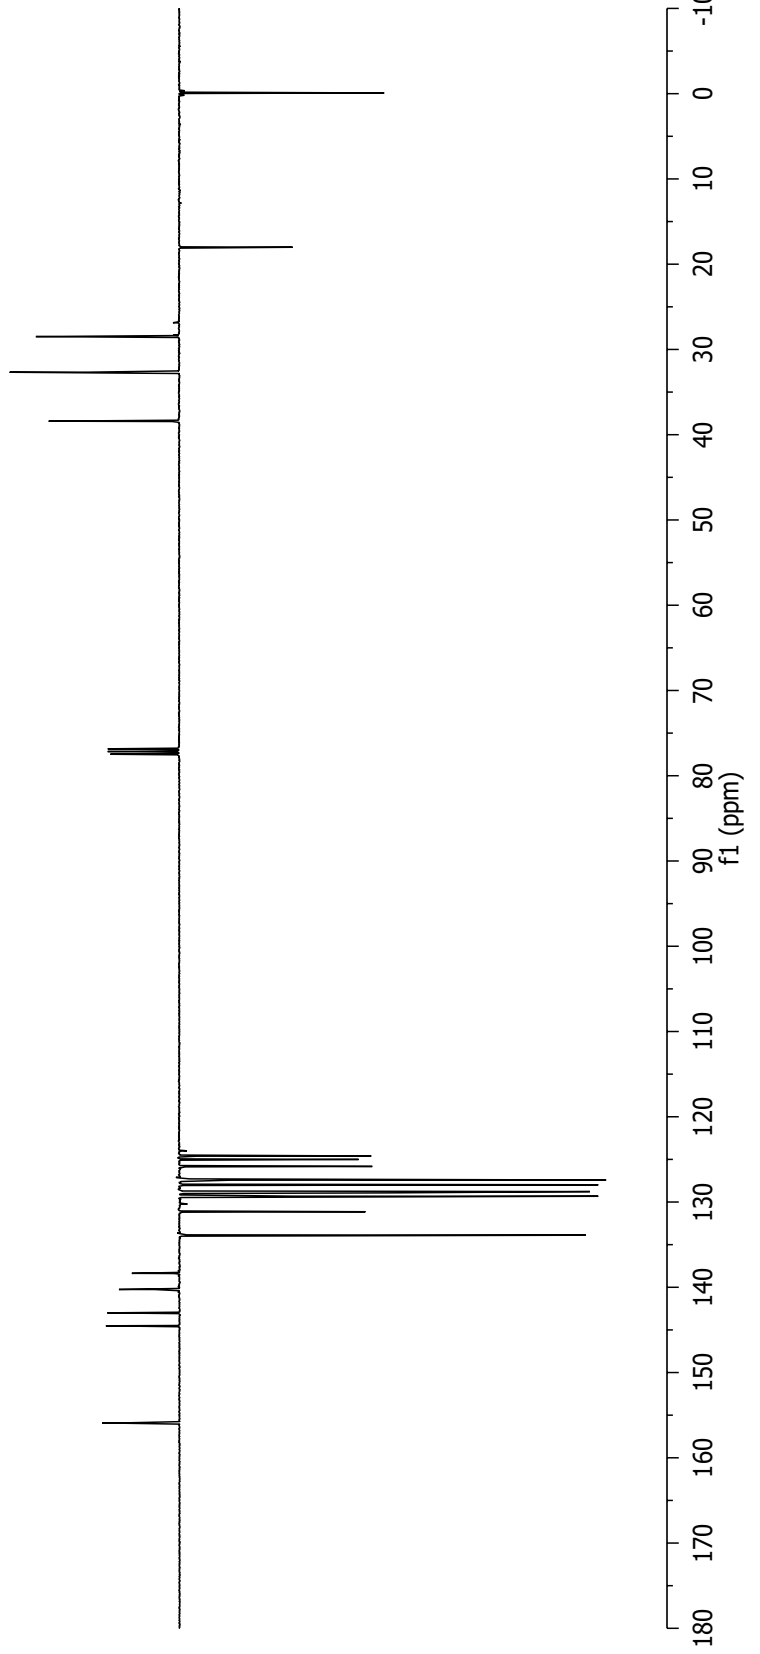

| Parameter                | Value                    |
|--------------------------|--------------------------|
| 1 Title                  | MFW02088col2E-dry3.2.fid |
| 2 Solvent                | CDCl3                    |
| 3 Temperature            | 300.0                    |
| 4 Number of Scans        | 254                      |
| 5 Receiver Gain          | 1030.0                   |
| 6 Relaxation Delay       | 12.5000                  |
| 7 Pulse Width            | 13.5000                  |
| 8 Spectrometer Frequency | 119.26                   |
| 9 Nucleus                | 29Si                     |

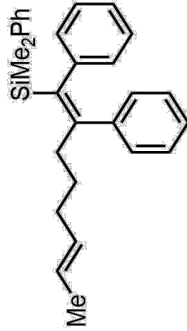

**13**

Chemical Formula: C<sub>28</sub>H<sub>32</sub>Si  
 Exact Mass: 396.2273  
 Molecular Weight: 396.6490

—11.59

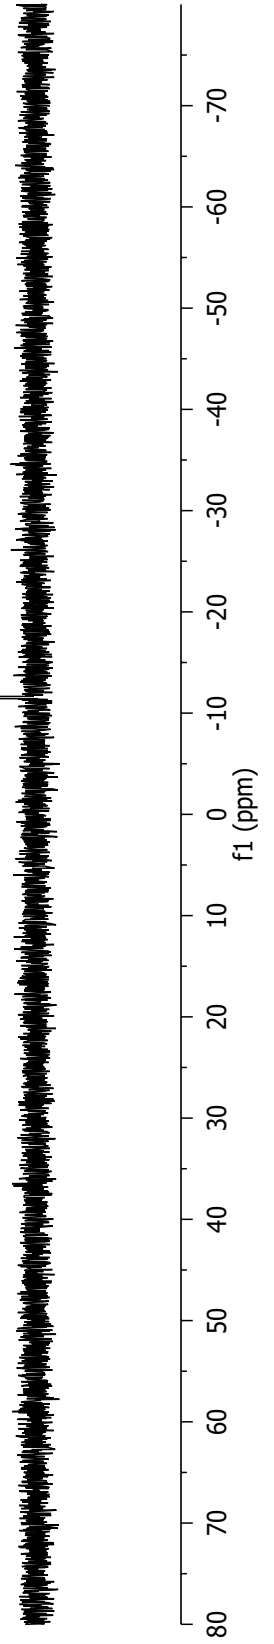



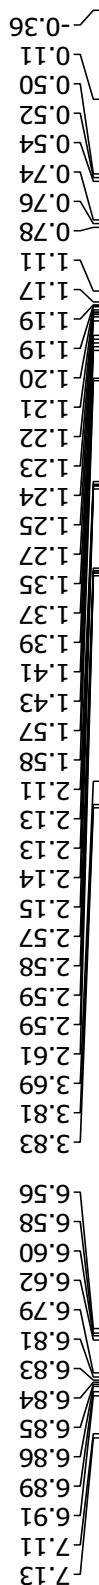

| Parameter                | Value               |
|--------------------------|---------------------|
| 1 Title                  | MFW02069col2A.1.fid |
| 2 Solvent                | CDCl3               |
| 3 Temperature            | 298.2               |
| 4 Number of Scans        | 16                  |
| 5 Receiver Gain          | 9.0                 |
| 6 Relaxation Delay       | 1.0000              |
| 7 Pulse Width            | 15.0000             |
| 8 Spectrometer Frequency | 400.13              |
| 9 Nucleus                | 1H                  |

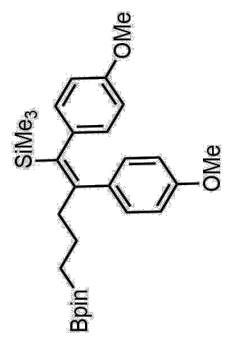

**15**  
 Chemical Formula: C<sub>28</sub>H<sub>41</sub>O<sub>2</sub>Si  
 Exact Mass: 353.1937  
 Molecular Weight: 353.5570

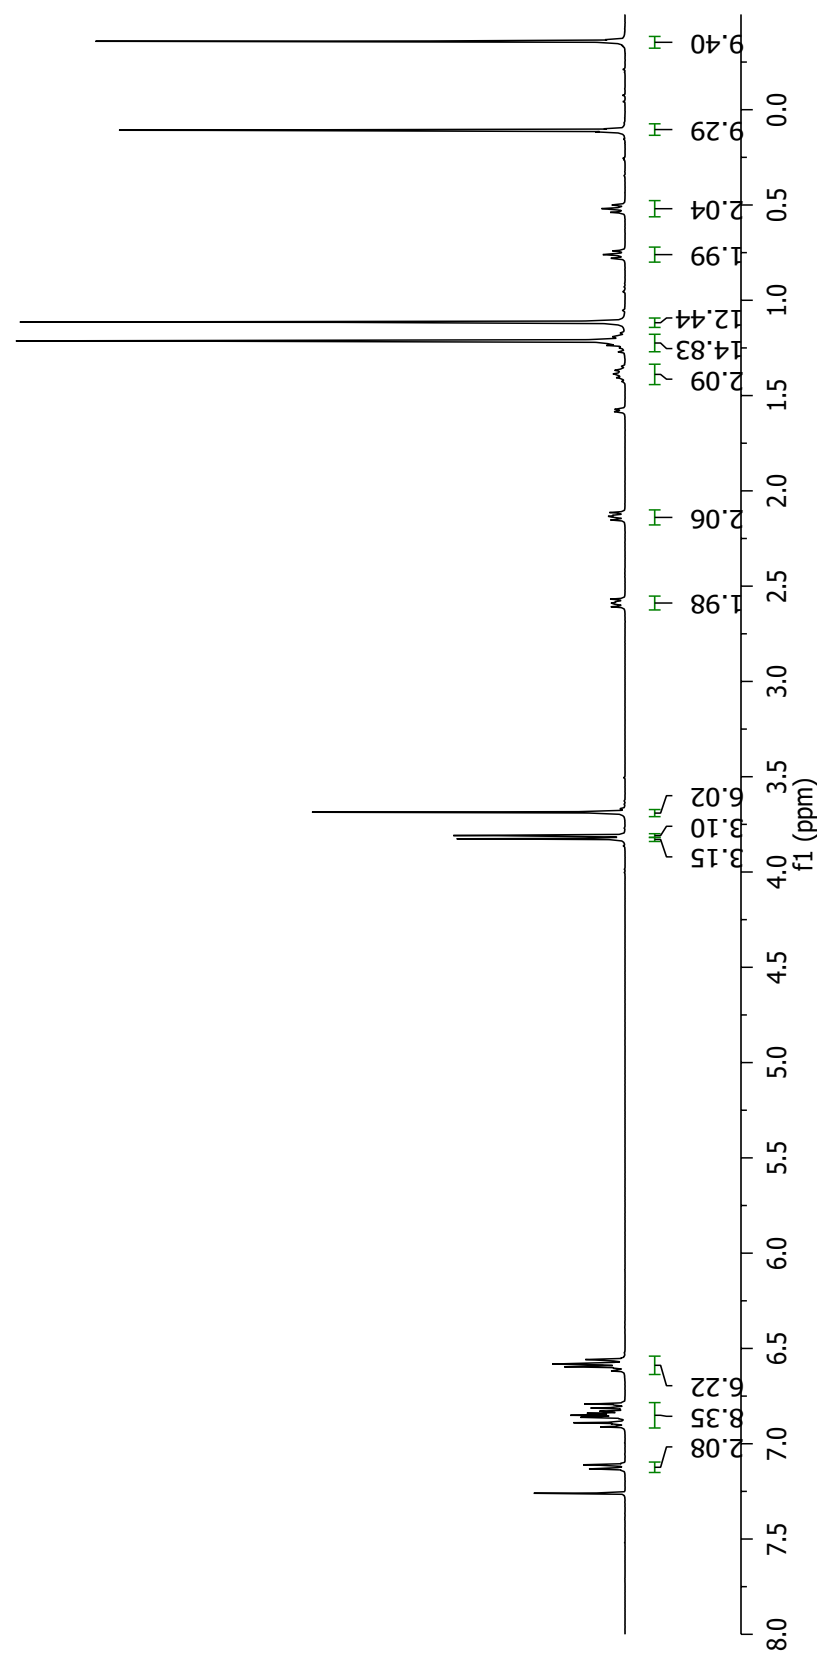

158.59 157.22 157.18 156.48 154.00 153.78 141.16 139.59 137.55 137.12 136.85 135.81 130.06 130.05 130.02 129.25 113.38 113.13 112.75 112.64

| Parameter                | Value               |
|--------------------------|---------------------|
| 1 Title                  | MFW02069colZA.2.fid |
| 2 Solvent                | CDCl3               |
| 3 Temperature            | 298.2               |
| 4 Number of Scans        | 256                 |
| 5 Receiver Gain          | 512.0               |
| 6 Relaxation Delay       | 3.0000              |
| 7 Pulse Width            | 10.7000             |
| 8 Spectrometer Frequency | 100.62              |
| 9 Nucleus                | 13C                 |

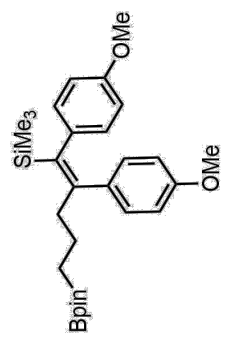

**15**  
 Chemical Formula: C<sub>28</sub>H<sub>44</sub>O<sub>2</sub>Si  
 Exact Mass: 353.1937  
 Molecular Weight: 353.5570

55.36 55.24 55.10 40.86 39.54 24.98 24.83 23.30 22.35 1.25 0.47

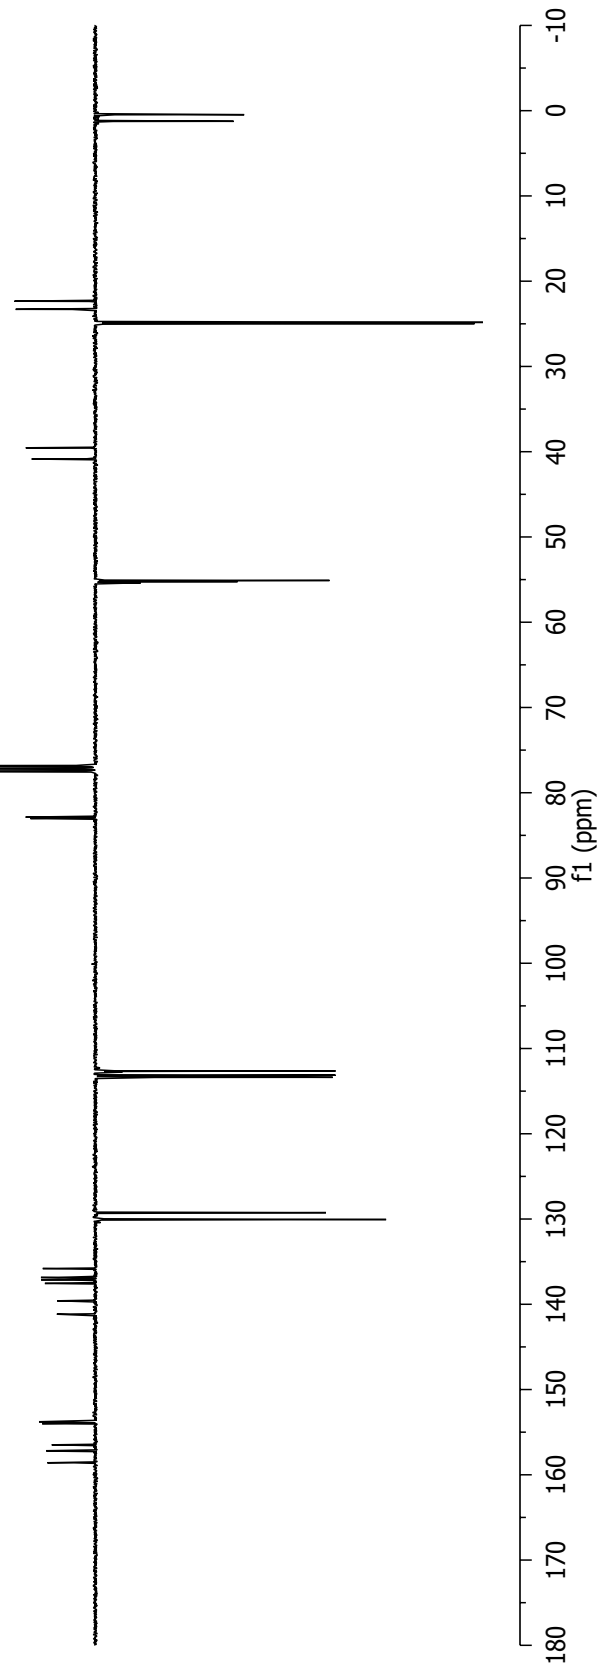

| Parameter                | Value               |
|--------------------------|---------------------|
| 1 Title                  | MFW02069col2A.2.fid |
| 2 Solvent                | CDCl3               |
| 3 Temperature            | 300.0               |
| 4 Number of Scans        | 128                 |
| 5 Receiver Gain          | 1030.0              |
| 6 Relaxation Delay       | 12.5000             |
| 7 Pulse Width            | 13.5000             |
| 8 Spectrometer Frequency | 119.26              |
| 9 Nucleus                | <sup>29</sup> Si    |

7.79  
7.60

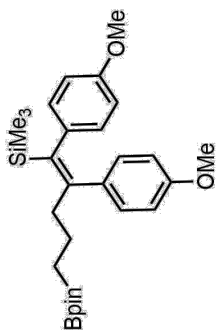

**15**

Chemical Formula: C<sub>28</sub>H<sub>41</sub>O<sub>2</sub>Si

Exact Mass: 353.1937

Molecular Weight: 353.5570

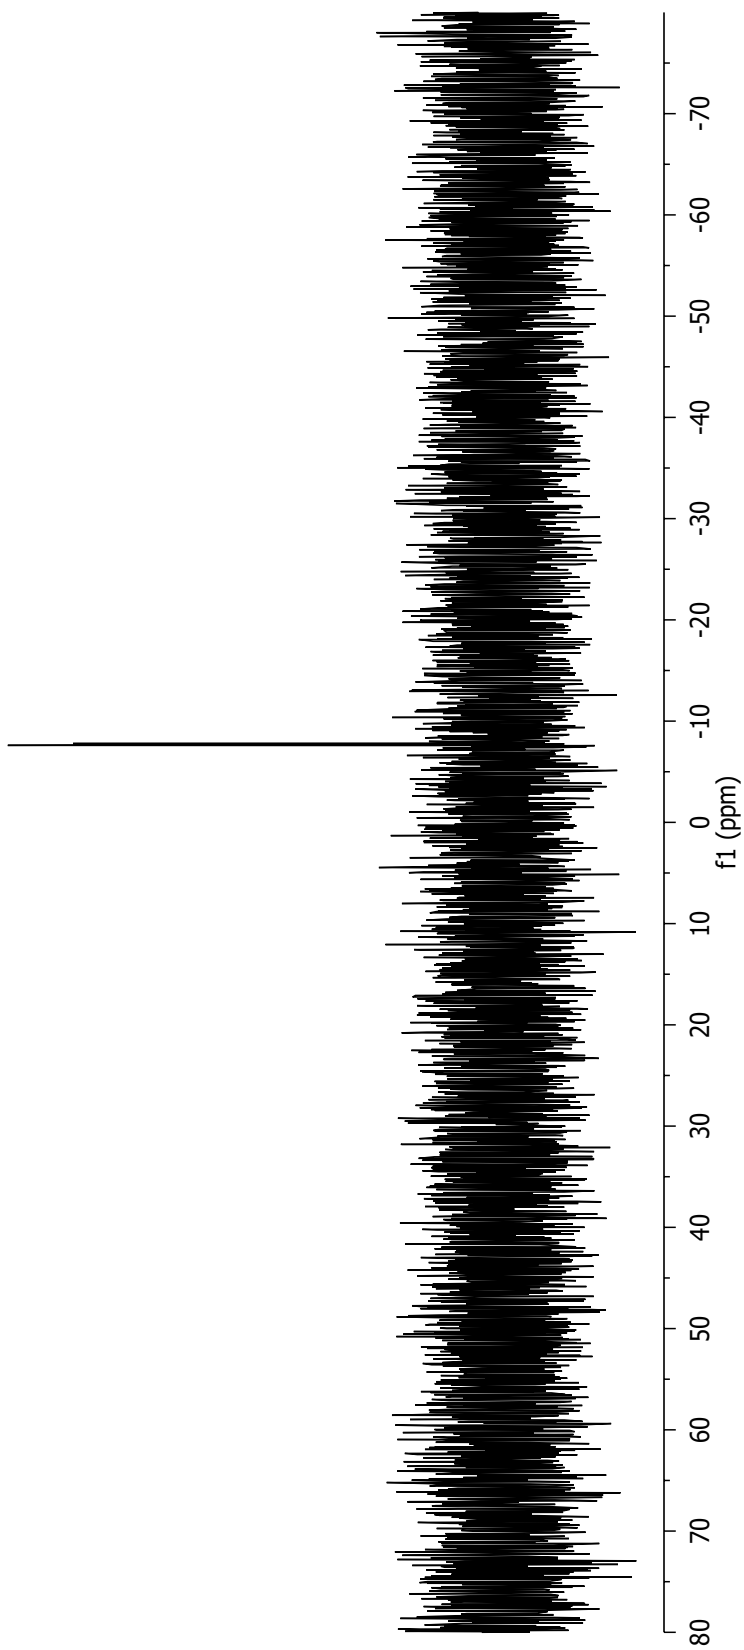

—34.10

| Parameter                | Value                |
|--------------------------|----------------------|
| 1 Title                  | MFW02069-11B-2.1.fid |
| 2 Solvent                | CDCl3                |
| 3 Temperature            | 300.0                |
| 4 Number of Scans        | 128                  |
| 5 Receiver Gain          | 203.0                |
| 6 Relaxation Delay       | 1.0000               |
| 7 Pulse Width            | 8.3000               |
| 8 Spectrometer Frequency | 128.38               |
| 9 Nucleus                | 11B                  |

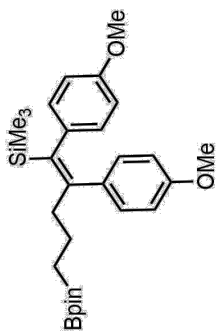

**15**

Chemical Formula: C<sub>28</sub>H<sub>41</sub>O<sub>2</sub>Si  
Exact Mass: 353.1937  
Molecular Weight: 353.5570

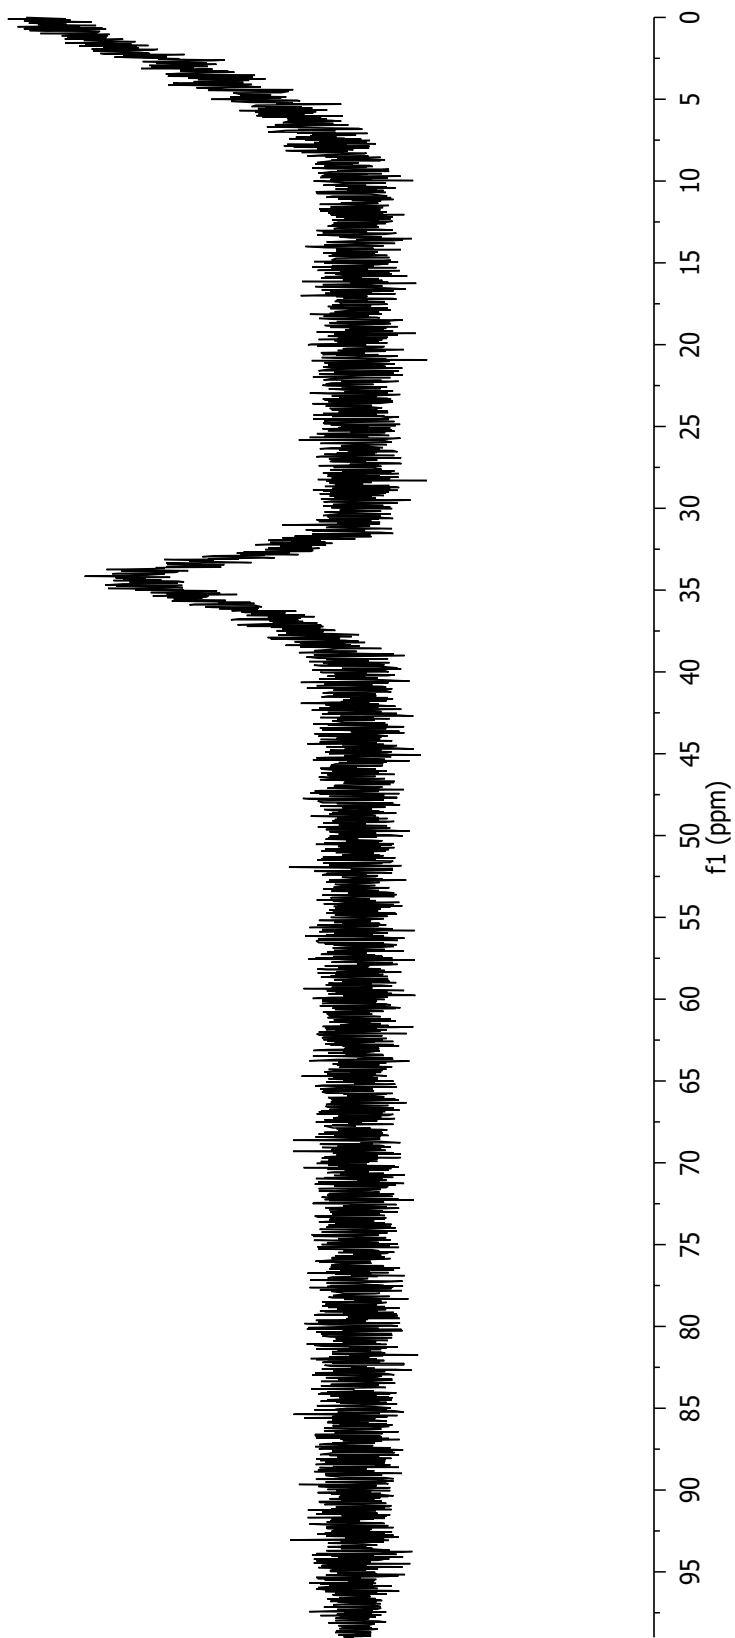



150.96  
146.17  
144.05  
143.01  
138.34  
133.45  
133.19  
129.05  
128.89  
128.77  
128.72  
128.52  
128.45  
127.38  
127.14  
126.40  
126.18  
125.22

| Parameter                | Value              |
|--------------------------|--------------------|
| 1 Title                  | SBK03283B-hv.3.fid |
| 2 Solvent                | CDCl3              |
| 3 Temperature            | 300.0              |
| 4 Number of Scans        | 1024               |
| 5 Receiver Gain          | 2050.0             |
| 6 Relaxation Delay       | 5.0000             |
| 7 Pulse Width            | 10.6300            |
| 8 Spectrometer Frequency | 150.97             |
| 9 Nucleus                | <sup>13</sup> C    |

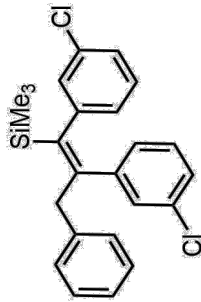

**16**

Chemical Formula: C<sub>24</sub>H<sub>24</sub>Cl<sub>2</sub>Si  
Exact Mass: 410.1024  
Molecular Weight: 411.4410

—43.66  
—1.08

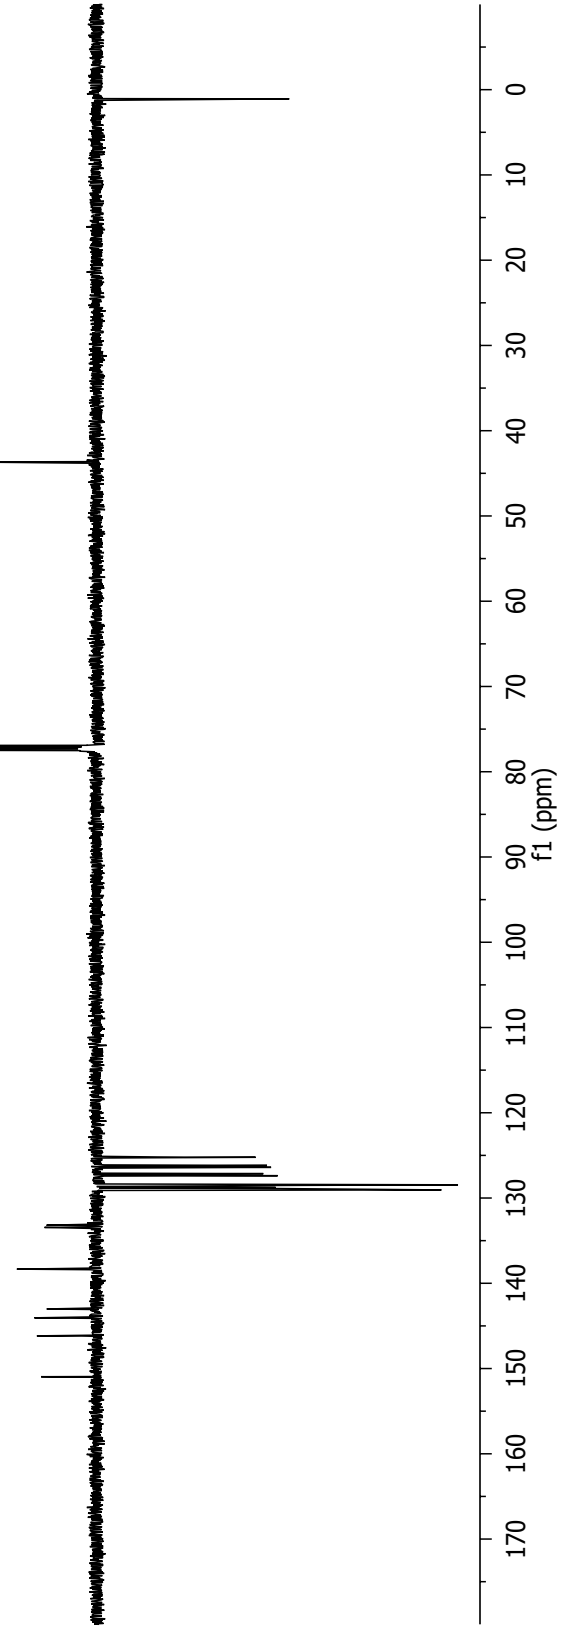

| Parameter                | Value              |
|--------------------------|--------------------|
| 1 Title                  | SBK03283B-hv.2.fid |
| 2 Solvent                | CDCl3              |
| 3 Temperature            | 300.0              |
| 4 Number of Scans        | 256                |
| 5 Receiver Gain          | 1030.0             |
| 6 Relaxation Delay       | 12.5000            |
| 7 Pulse Width            | 13.5000            |
| 8 Spectrometer Frequency | 119.26             |
| 9 Nucleus                | 29Si               |

—6.46

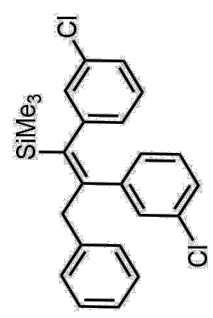

**16**

Chemical Formula: C<sub>24</sub>H<sub>24</sub>Cl<sub>2</sub>Si  
 Exact Mass: 410.1024  
 Molecular Weight: 411.4410

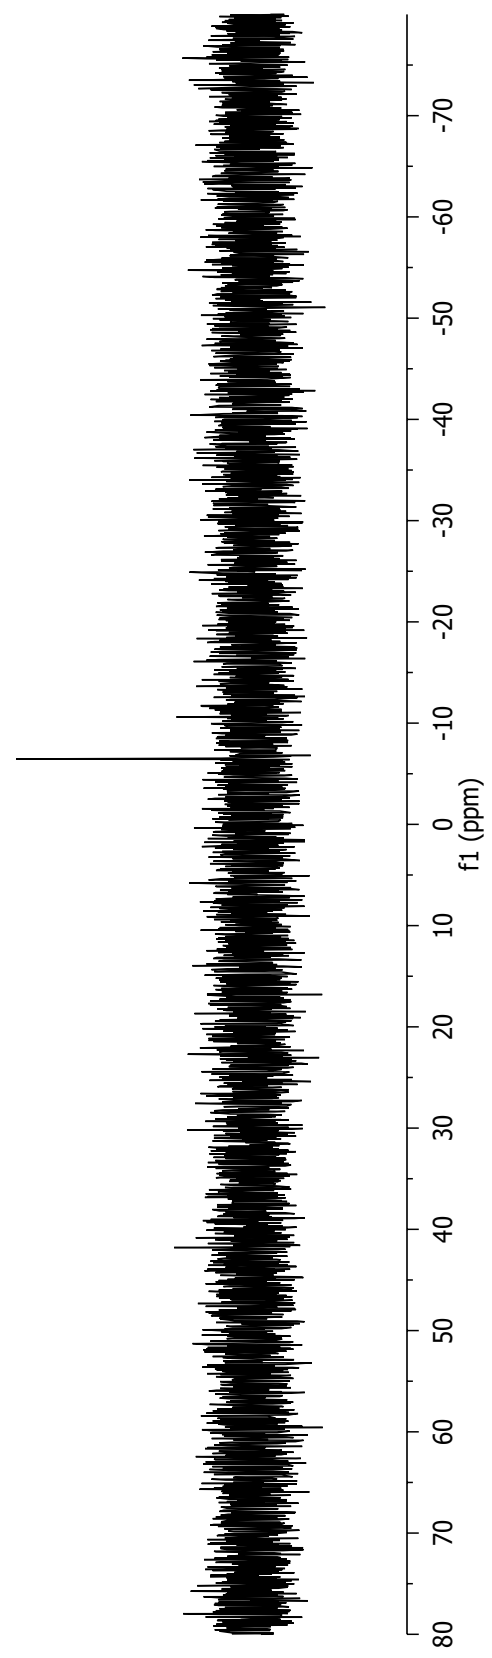

7.32  
7.31  
7.30  
7.29  
7.27  
7.25  
7.25  
7.24  
7.24  
7.24  
7.22  
7.22  
7.20  
7.19  
7.13  
7.13  
7.12  
7.12  
7.12  
7.12  
7.12  
7.11  
7.11  
7.10  
1.08  
1.07  
1.06  
1.05  
1.04  
0.68  
0.67  
0.66

| Parameter                | Value           |
|--------------------------|-----------------|
| 1 Title                  | SBK03264B.1.fid |
| 2 Solvent                | CDCl3           |
| 3 Temperature            | 298.8           |
| 4 Number of Scans        | 16              |
| 5 Receiver Gain          | 128.0           |
| 6 Relaxation Delay       | 1.0000          |
| 7 Pulse Width            | 10.5000         |
| 8 Spectrometer Frequency | 600.32          |
| 9 Nucleus                | <sup>1</sup> H  |

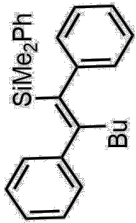

**28**

Chemical Formula: C<sub>26</sub>H<sub>30</sub>Si  
 Exact Mass: 370.2117  
 Molecular Weight: 370.6110

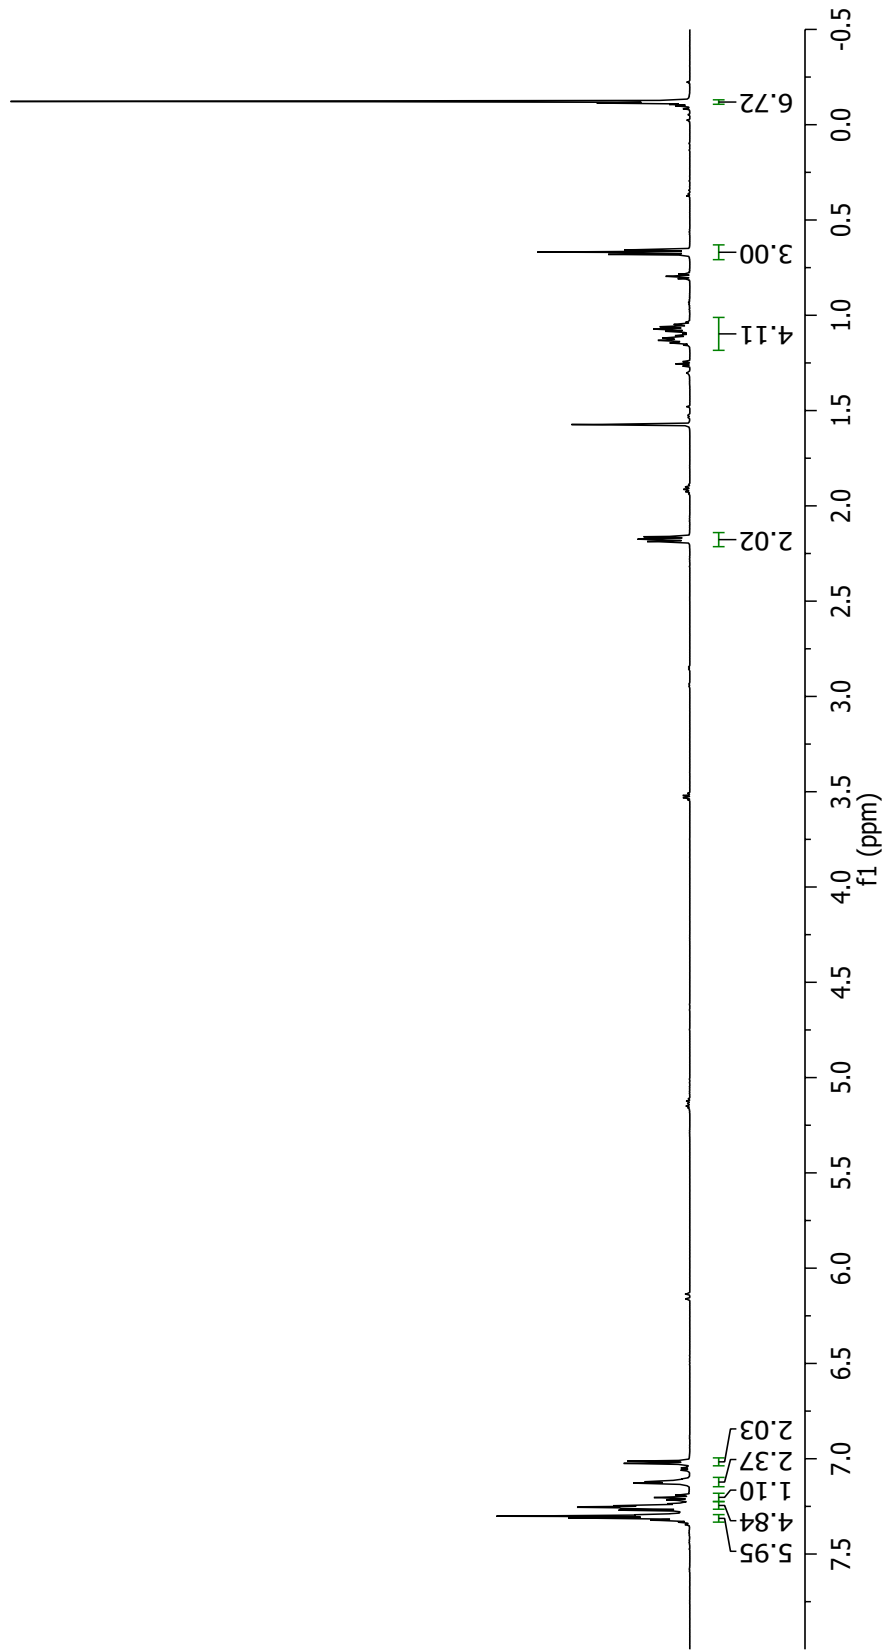



155.99  
144.44  
143.92  
140.29  
139.87  
134.00  
129.10  
128.76  
128.38  
127.94  
127.75  
127.42  
126.88  
125.28

| Parameter                | Value           |
|--------------------------|-----------------|
| 1 Title                  | SBK03264B.3.fid |
| 2 Solvent                | CDCl3           |
| 3 Temperature            | 300.1           |
| 4 Number of Scans        | 1024            |
| 5 Receiver Gain          | 2050.0          |
| 6 Relaxation Delay       | 5.0000          |
| 7 Pulse Width            | 10.6300         |
| 8 Spectrometer Frequency | 150.97          |
| 9 Nucleus                | 13C             |

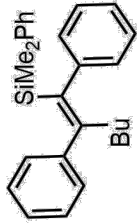

**28**

Chemical Formula: C<sub>26</sub>H<sub>30</sub>Si  
Exact Mass: 370.2117  
Molecular Weight: 370.6110

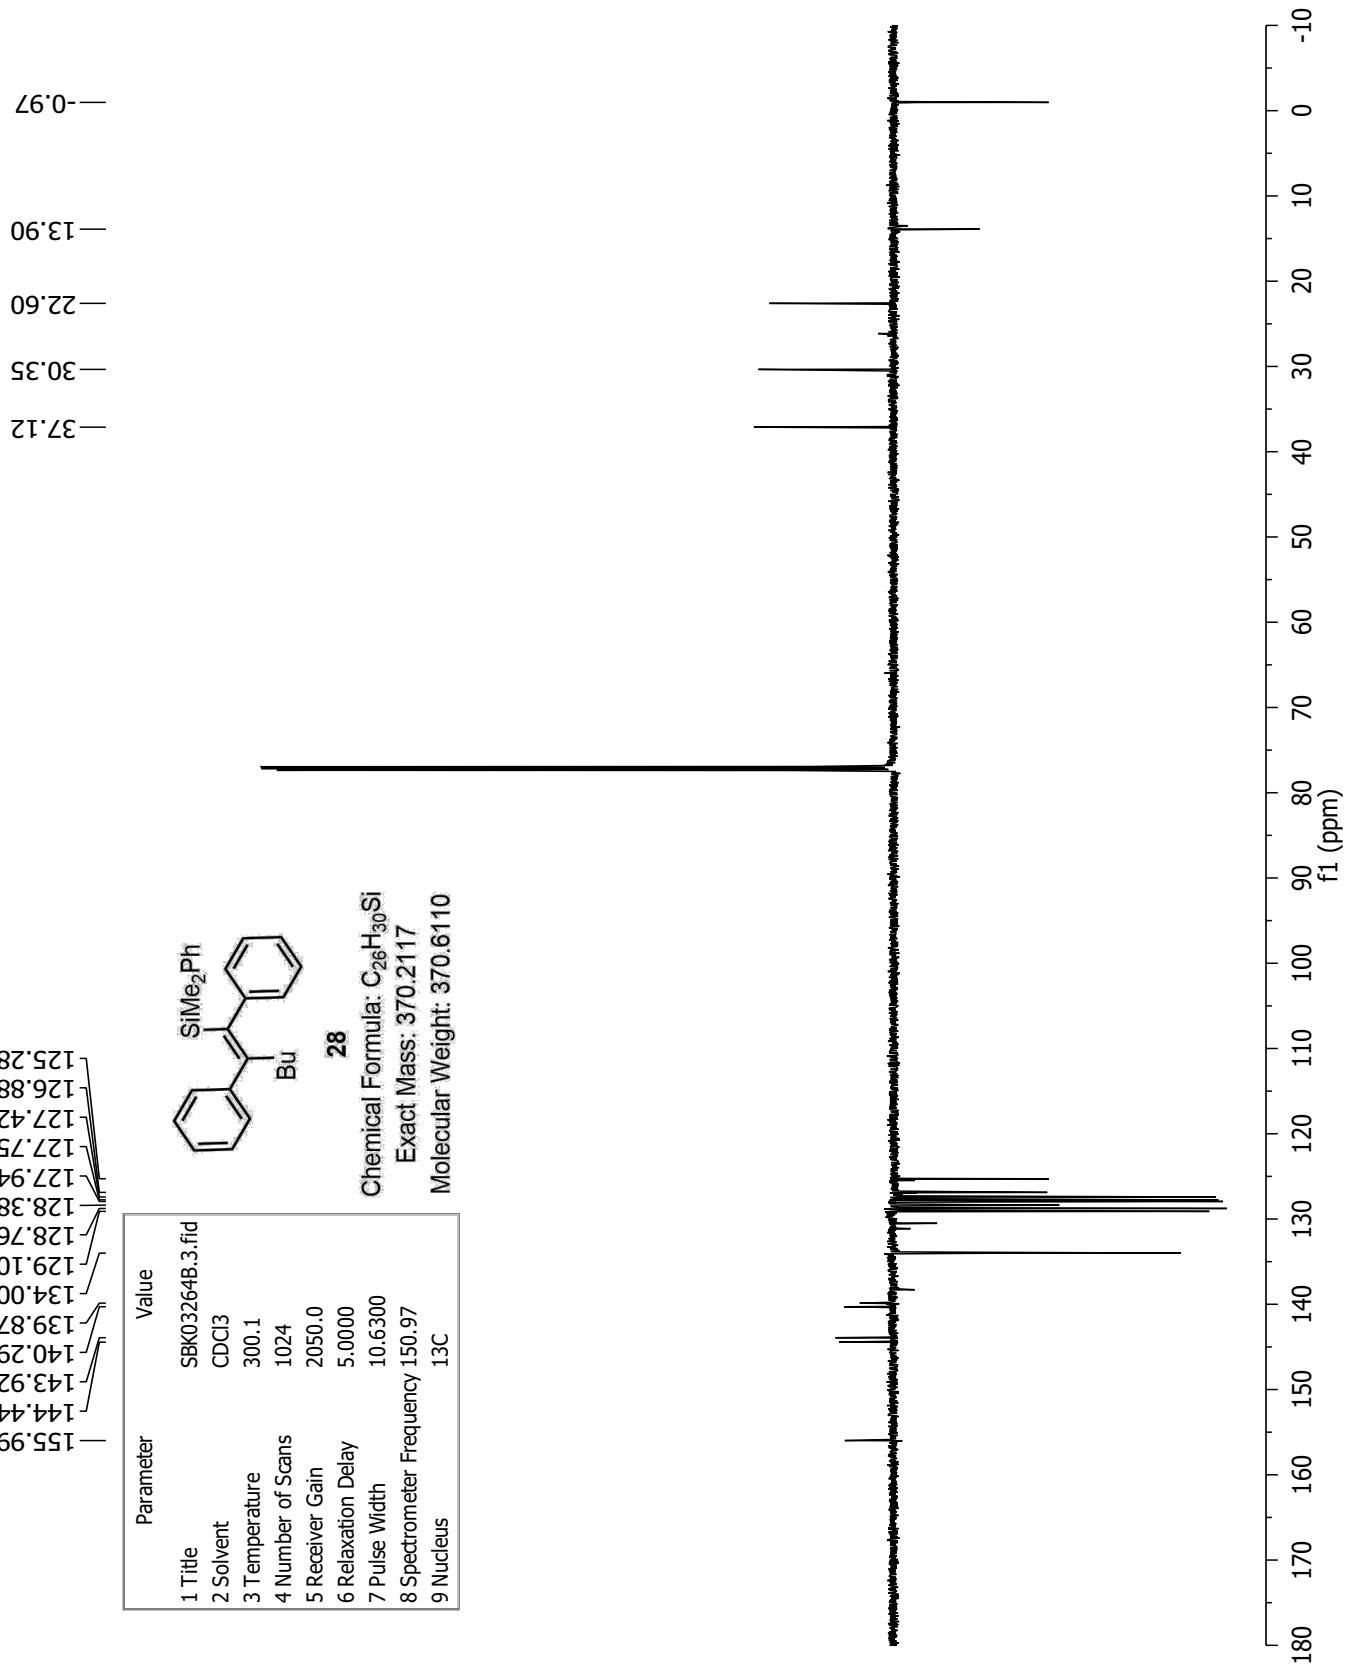

| Parameter                | Value           |
|--------------------------|-----------------|
| 1 Title                  | SBK03264B.2.fid |
| 2 Solvent                | CDCl3           |
| 3 Temperature            | 297.4           |
| 4 Number of Scans        | 256             |
| 5 Receiver Gain          | 2050.0          |
| 6 Relaxation Delay       | 12.5000         |
| 7 Pulse Width            | 13.5000         |
| 8 Spectrometer Frequency | 119.26          |
| 9 Nucleus                | 29Si            |

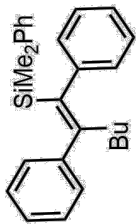

**28**

Chemical Formula: C<sub>26</sub>H<sub>30</sub>Si  
 Exact Mass: 370.2117  
 Molecular Weight: 370.6110

—12.57

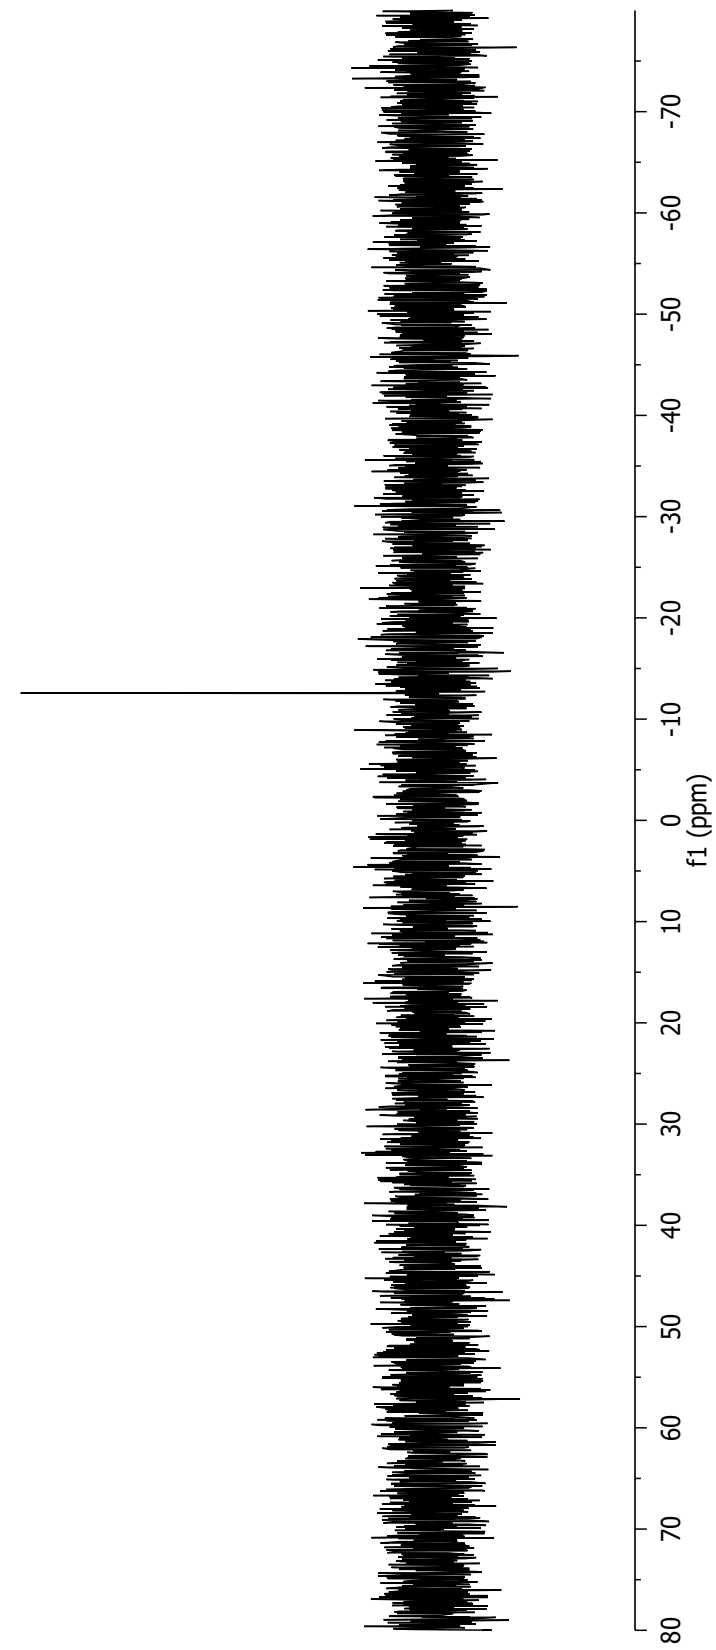

7.15  
7.13  
7.12  
7.11  
7.09  
7.06  
7.05  
7.03  
7.02  
7.00  
6.85  
6.84  
6.83  
6.83

| Parameter                | Value           |
|--------------------------|-----------------|
| 1 Title                  | SBK04015B.1.fid |
| 2 Solvent                | CDCl3           |
| 3 Temperature            | 300.0           |
| 4 Number of Scans        | 16              |
| 5 Receiver Gain          | 161.0           |
| 6 Relaxation Delay       | 1.0000          |
| 7 Pulse Width            | 10.5000         |
| 8 Spectrometer Frequency | 600.32          |
| 9 Nucleus                | <sup>1</sup> H  |

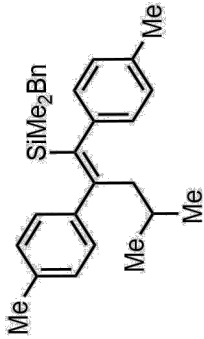

**29**

Chemical Formula: C<sub>29</sub>H<sub>36</sub>Si  
Exact Mass: 412.2586  
Molecular Weight: 412.6920

2.36  
2.35  
2.10  
2.09  
1.79  
0.68  
0.67  
-0.47

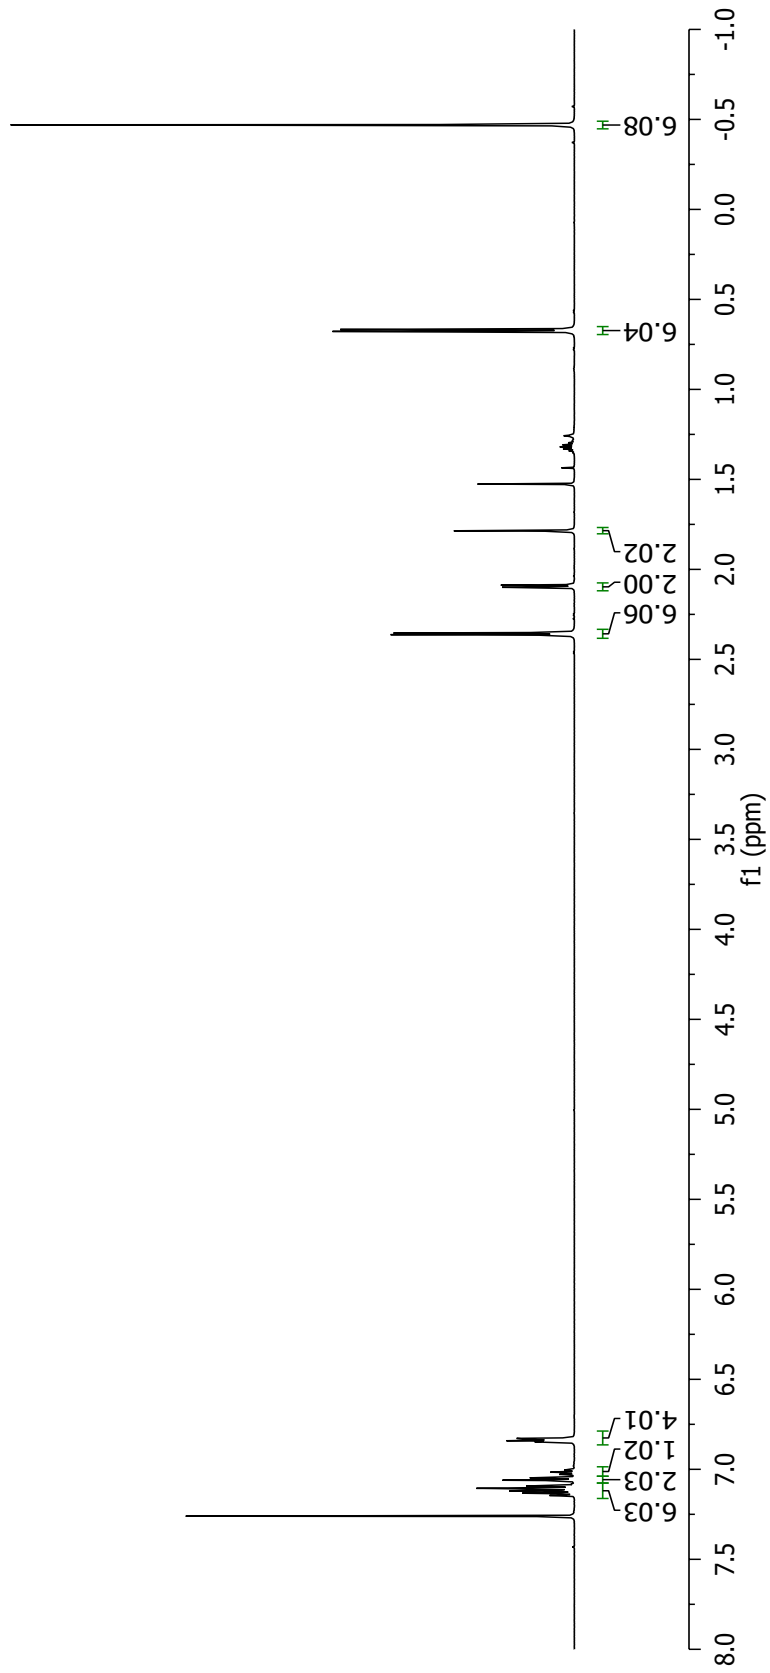

26.43  
 26.05  
 22.48  
 21.38  
 21.28  
 -1.58

-45.89

154.42  
 141.50  
 141.26  
 140.78  
 140.68  
 136.60  
 134.48  
 128.78  
 128.68  
 128.62  
 128.57  
 128.53  
 128.07  
 123.89

| Parameter                | Value           |
|--------------------------|-----------------|
| 1 Title                  | SBK04015B.2.fid |
| 2 Solvent                | CDCl3           |
| 3 Temperature            | 300.0           |
| 4 Number of Scans        | 1024            |
| 5 Receiver Gain          | 2050.0          |
| 6 Relaxation Delay       | 5.0000          |
| 7 Pulse Width            | 10.6300         |
| 8 Spectrometer Frequency | 150.97          |
| 9 Nucleus                | <sup>13</sup> C |

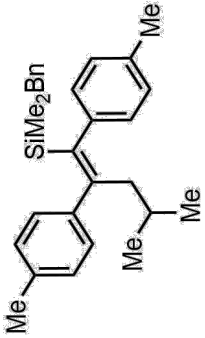

**29**

Chemical Formula: C<sub>29</sub>H<sub>36</sub>Si  
 Exact Mass: 412.2586  
 Molecular Weight: 412.6920

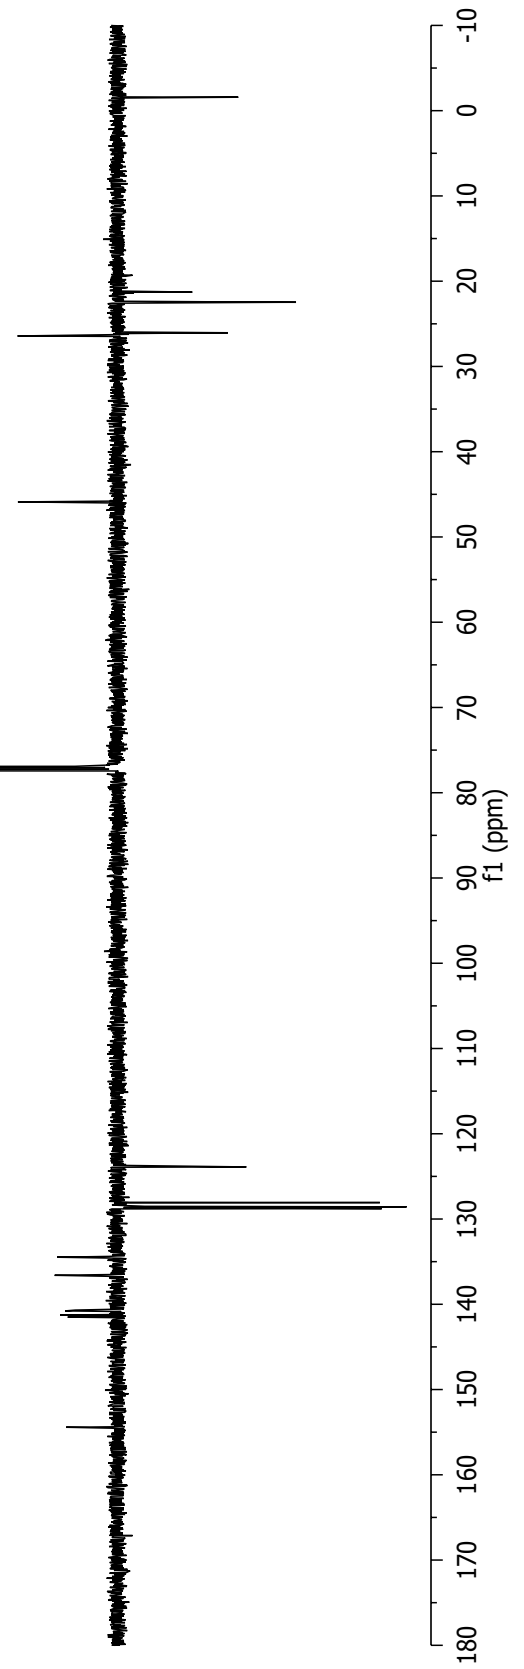

—7.40

| Parameter                | Value           |
|--------------------------|-----------------|
| 1 Title                  | SBK04015B.3.fid |
| 2 Solvent                | CDCl3           |
| 3 Temperature            | 300.0           |
| 4 Number of Scans        | 256             |
| 5 Receiver Gain          | 1030.0          |
| 6 Relaxation Delay       | 12.5000         |
| 7 Pulse Width            | 13.5000         |
| 8 Spectrometer Frequency | 119.26          |
| 9 Nucleus                | 29Si            |

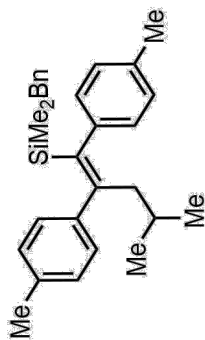

**29**

Chemical Formula: C<sub>29</sub>H<sub>36</sub>Si  
Exact Mass: 412.2586  
Molecular Weight: 412.6920

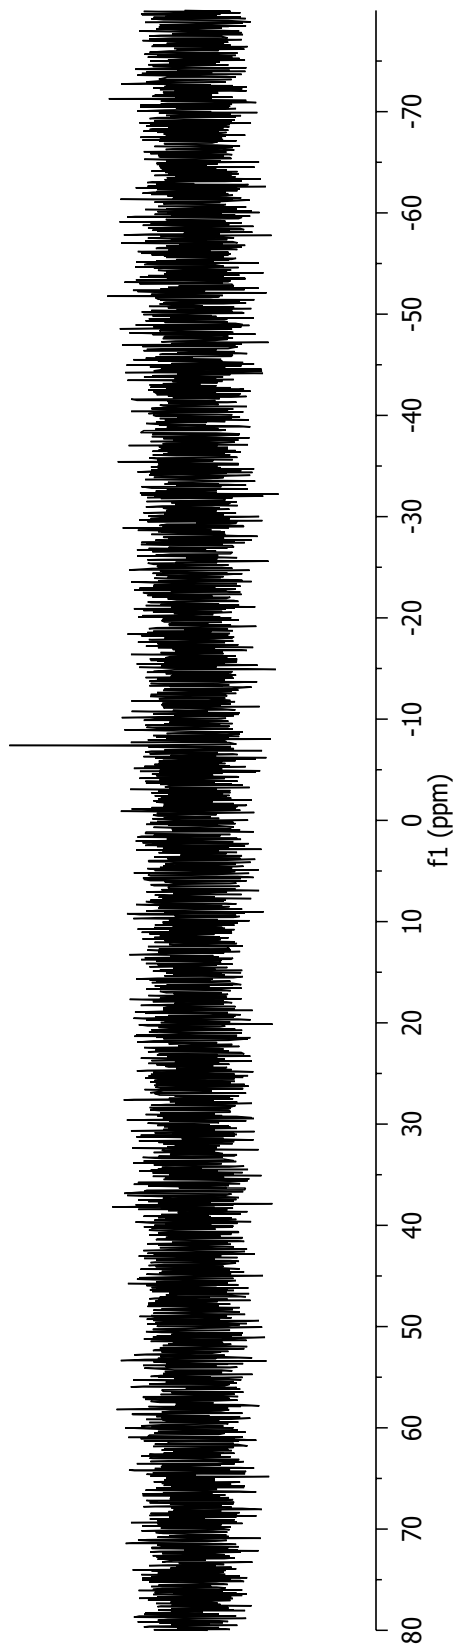

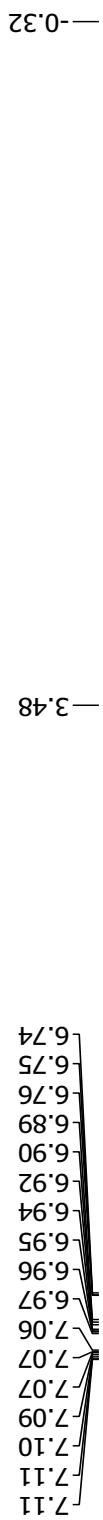

| Parameter                | Value             |
|--------------------------|-------------------|
| 1 Title                  | SBK03292C-2.1.fid |
| 2 Solvent                | CDCl3             |
| 3 Temperature            | 300.0             |
| 4 Number of Scans        | 16                |
| 5 Receiver Gain          | 181.0             |
| 6 Relaxation Delay       | 1.0000            |
| 7 Pulse Width            | 10.5000           |
| 8 Spectrometer Frequency | 600.32            |
| 9 Nucleus                | 1H                |

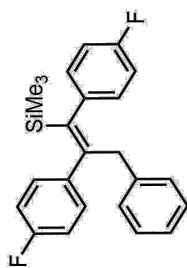

**30**  
 Chemical Formula: C<sub>24</sub>H<sub>24</sub>F<sub>2</sub>Si  
 Exact Mass: 378.1615  
 Molecular Weight: 378.5378

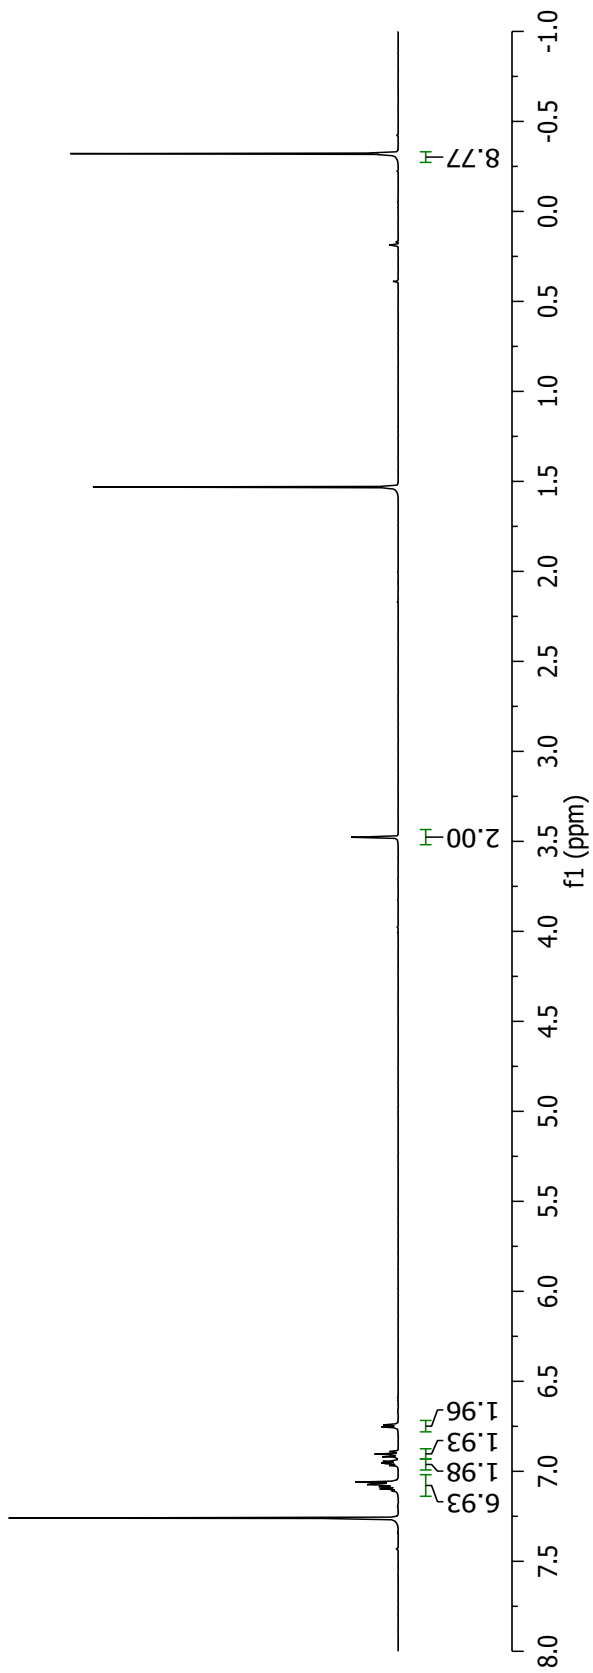

163.27  
162.42  
160.83  
160.00  
151.72  
151.71  
142.52  
140.08  
140.05  
139.16  
139.12  
138.86  
130.85  
130.78  
129.75  
129.67  
129.19  
128.12  
125.93  
115.34  
115.13  
114.74  
114.53

| Parameter                | Value                   |
|--------------------------|-------------------------|
| 1 Title                  | SBK03292C-NOE-13C.4.fid |
| 2 Solvent                | CDCl3                   |
| 3 Temperature            | 298.2                   |
| 4 Number of Scans        | 1024                    |
| 5 Receiver Gain          | 512.0                   |
| 6 Relaxation Delay       | 3.0000                  |
| 7 Pulse Width            | 10.7000                 |
| 8 Spectrometer Frequency | 100.62                  |
| 9 Nucleus                | <sup>13</sup> C         |

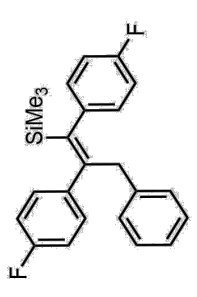

**30**  
 Chemical Formula: C<sub>24</sub>H<sub>24</sub>F<sub>2</sub>Si  
 Exact Mass: 378.1615  
 Molecular Weight: 378.5378

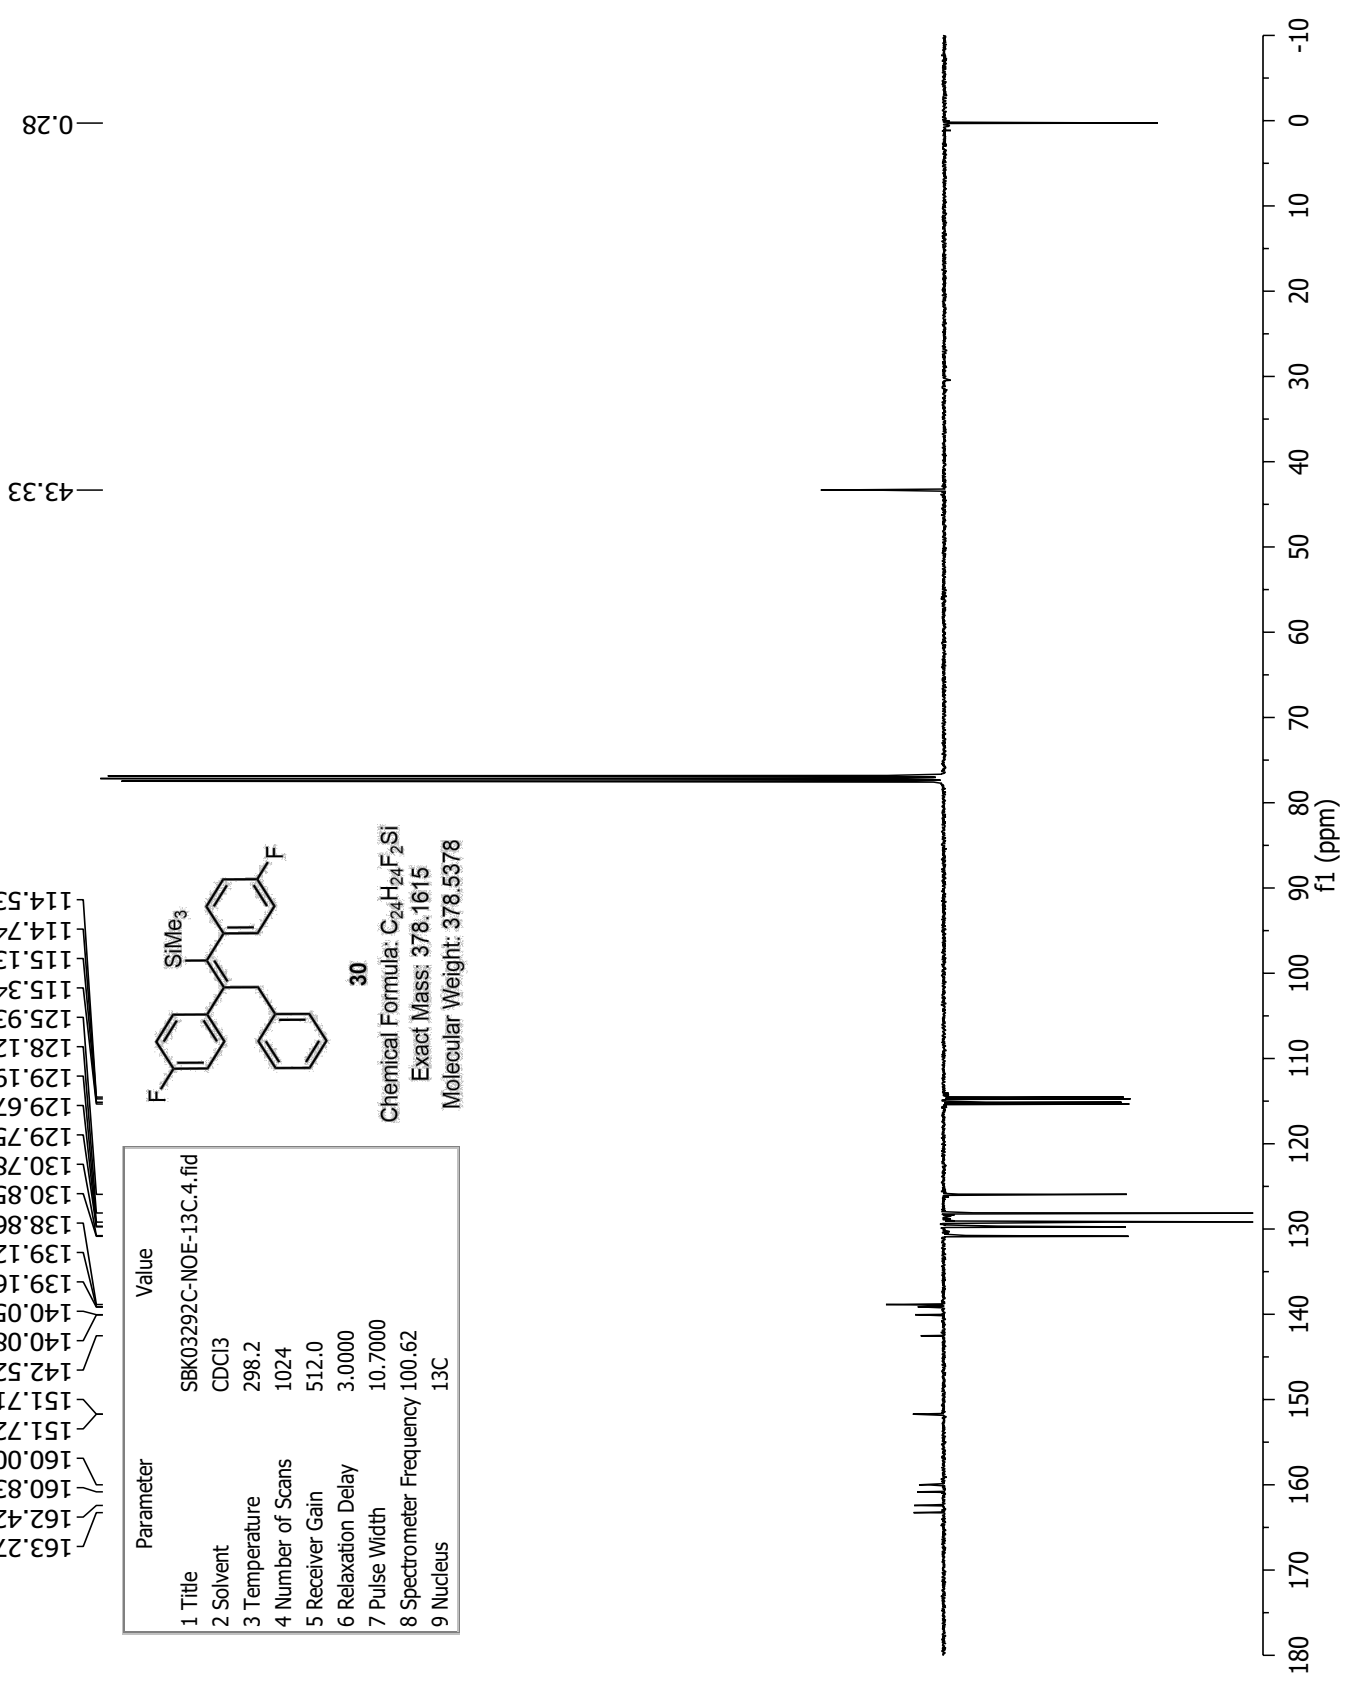

—6.70

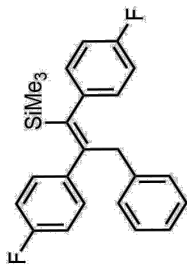

**30**

Chemical Formula: C<sub>24</sub>H<sub>24</sub>F<sub>2</sub>Si

Exact Mass: 378.1615

Molecular Weight: 378.5378

| Parameter                | Value              |
|--------------------------|--------------------|
| 1 Title                  | SBK03292C-Si.1.fid |
| 2 Solvent                | CDCl <sub>3</sub>  |
| 3 Temperature            | 300.0              |
| 4 Number of Scans        | 256                |
| 5 Receiver Gain          | 2050.0             |
| 6 Relaxation Delay       | 12.5000            |
| 7 Pulse Width            | 13.5000            |
| 8 Spectrometer Frequency | 119.26             |
| 9 Nucleus                | <sup>29</sup> Si   |

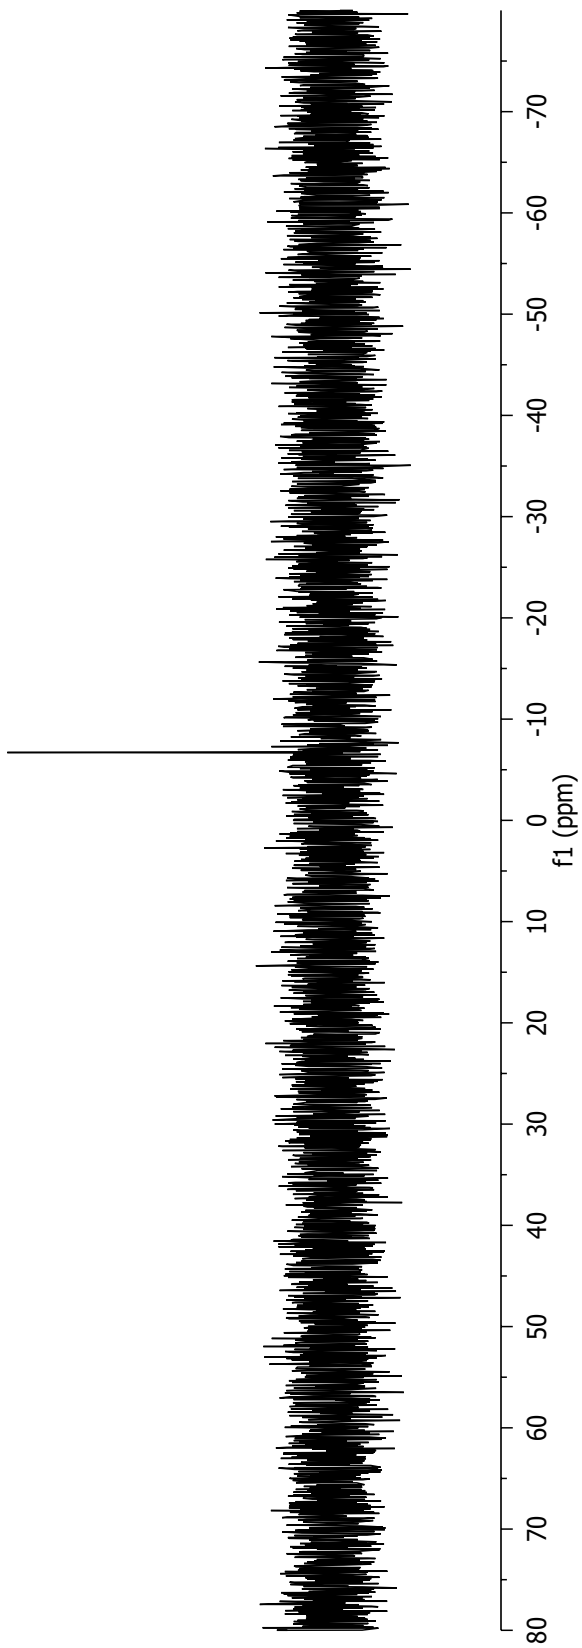



-115.63  
-117.92

| Parameter                | Value               |
|--------------------------|---------------------|
| 1 Title                  | SBK03292C-19F.1.fid |
| 2 Solvent                | CDCl3               |
| 3 Temperature            | 300.0               |
| 4 Number of Scans        | 16                  |
| 5 Receiver Gain          | 362.0               |
| 6 Relaxation Delay       | 3.0000              |
| 7 Pulse Width            | 11.4000             |
| 8 Spectrometer Frequency | 564.81              |
| 9 Nucleus                | 19F                 |

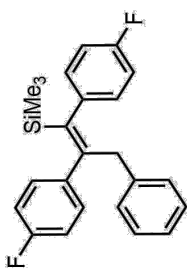

**30**

Chemical Formula: C<sub>24</sub>H<sub>24</sub>F<sub>2</sub>Si  
Exact Mass: 378.1615  
Molecular Weight: 378.5378

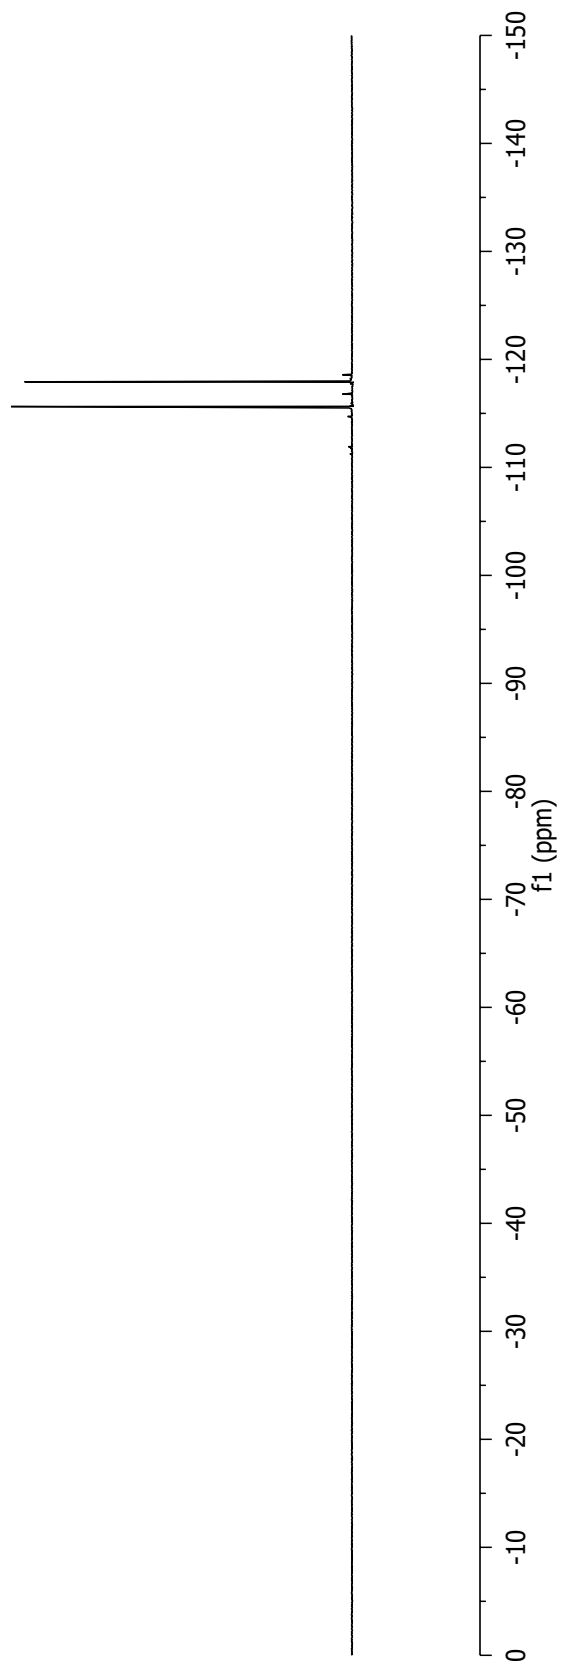

7.52  
7.51  
7.51  
7.51  
7.50  
7.50  
7.32  
7.32  
7.32  
7.31  
7.30

| Parameter                | Value           |
|--------------------------|-----------------|
| 1 Title                  | SBK03219B.1.fid |
| 2 Solvent                | CDCl3           |
| 3 Temperature            | 298.2           |
| 4 Number of Scans        | 16              |
| 5 Receiver Gain          | 10.1            |
| 6 Relaxation Delay       | 1.0000          |
| 7 Pulse Width            | 15.0000         |
| 8 Spectrometer Frequency | 400.13          |
| 9 Nucleus                | <sup>1</sup> H  |

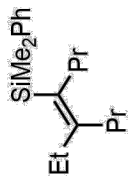

**16**

Chemical Formula: C<sub>18</sub>H<sub>30</sub>Si  
 Exact Mass: 274.2117  
 Molecular Weight: 274.5230

2.13  
2.12  
2.11  
2.11  
2.09  
2.08  
2.01  
2.00  
1.98  
1.96  
1.45  
1.43  
1.41  
1.39  
1.33  
1.31  
1.29  
1.27  
0.96  
0.94  
0.92  
0.90  
0.89  
0.87  
0.79  
0.77  
0.75  
0.35

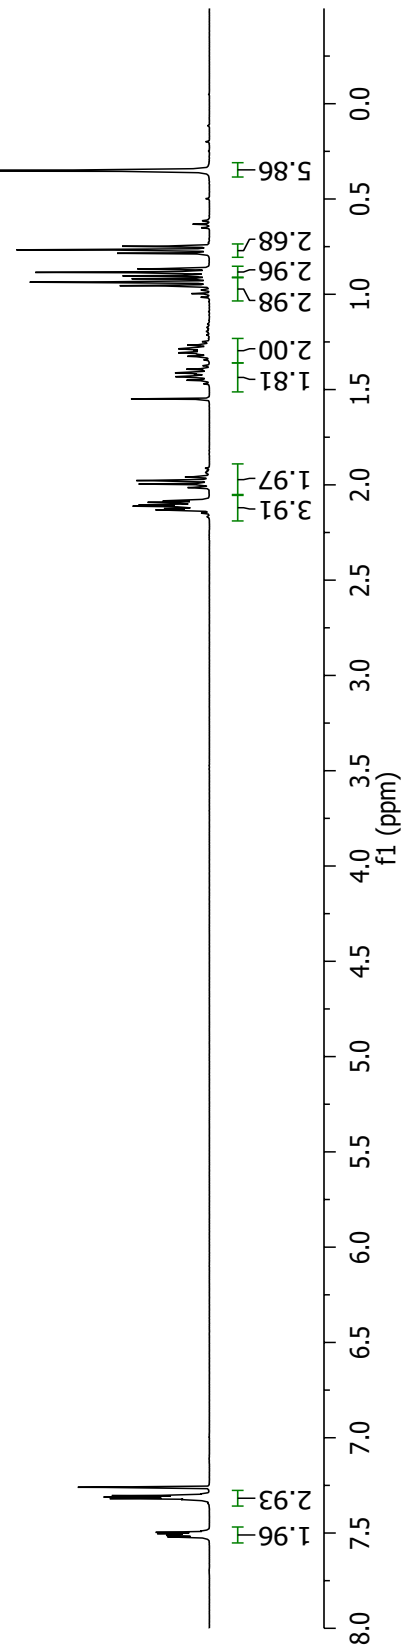

155.03  
141.45  
133.85  
130.28  
128.47  
127.68

| Parameter                | Value           |
|--------------------------|-----------------|
| 1 Title                  | SBK03219B.2.fid |
| 2 Solvent                | CDCl3           |
| 3 Temperature            | 298.2           |
| 4 Number of Scans        | 1024            |
| 5 Receiver Gain          | 512.0           |
| 6 Relaxation Delay       | 3.0000          |
| 7 Pulse Width            | 9.2500          |
| 8 Spectrometer Frequency | 100.62          |
| 9 Nucleus                | 13C             |

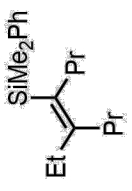

**16**  
 Chemical Formula: C<sub>18</sub>H<sub>30</sub>Si  
 Exact Mass: 274.2117  
 Molecular Weight: 274.5230

34.23  
32.81  
29.94  
24.66  
22.41  
14.68  
14.55  
13.42  
0.16

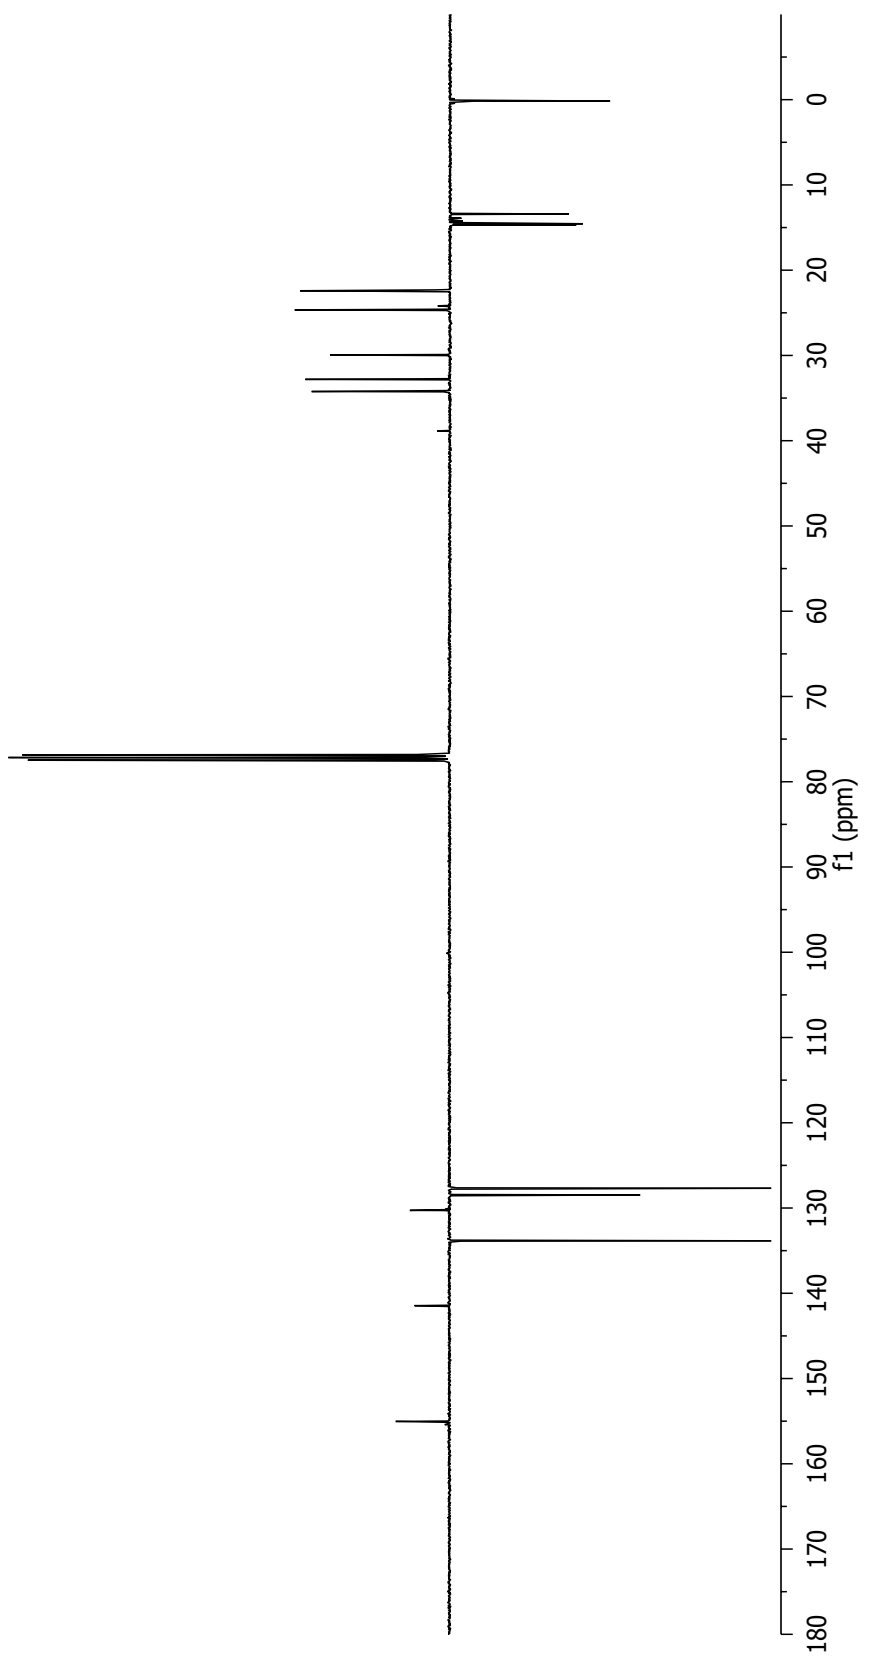



7.52  
7.51  
7.51  
7.51  
7.51  
7.50  
7.50  
7.31  
7.31  
7.31  
7.31  
2.16  
2.15  
2.13  
2.12  
2.11  
2.11  
2.10  
2.09  
2.09  
1.95  
1.94  
1.94  
1.93  
1.92  
1.33  
1.33  
1.32  
1.31  
1.29  
1.28  
1.27  
1.22  
1.21  
1.20  
1.18  
1.17  
1.16  
1.01  
1.00  
0.98  
0.89  
0.88  
0.87  
0.65  
0.64  
0.62  
0.36

| Parameter                | Value           |
|--------------------------|-----------------|
| 1 Title                  | SBK03220B.1.fid |
| 2 Solvent                | CDCl3           |
| 3 Temperature            | 298.0           |
| 4 Number of Scans        | 16              |
| 5 Receiver Gain          | 128.0           |
| 6 Relaxation Delay       | 1.0000          |
| 7 Pulse Width            | 10.5000         |
| 8 Spectrometer Frequency | 600.32          |
| 9 Nucleus                | 1H              |

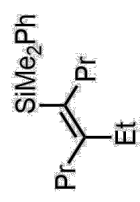

**17**

Chemical Formula: C<sub>18</sub>H<sub>30</sub>Si  
 Exact Mass: 274.2117  
 Molecular Weight: 274.5230

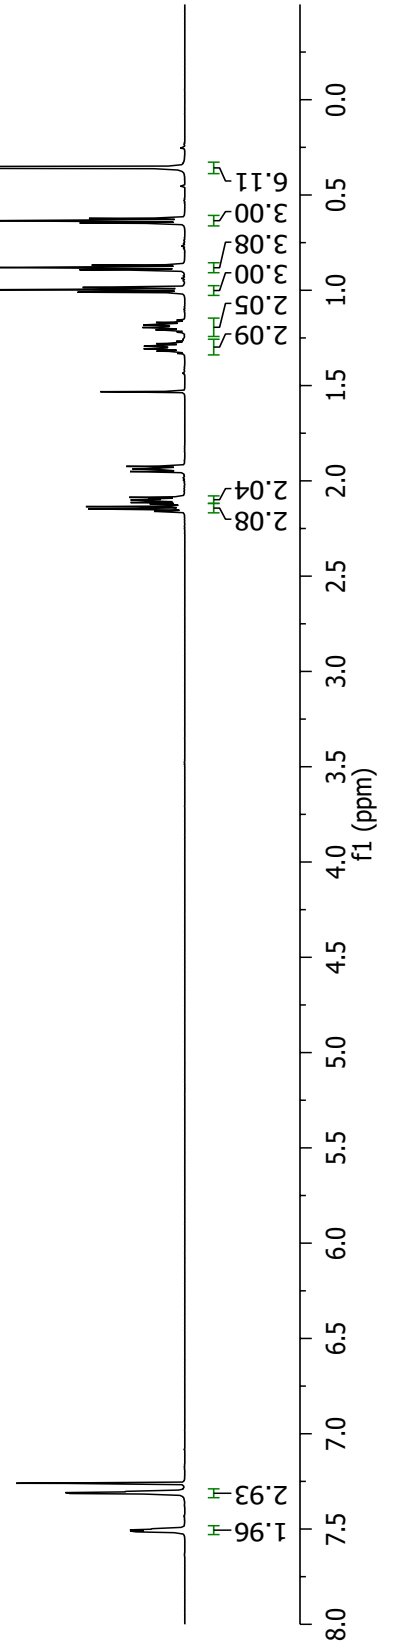

— 0.15  
 — 13.88  
 — 14.20  
 — 14.54  
 — 22.31  
 — 24.20  
 — 24.70  
 — 34.18  
 — 38.87

— 155.42  
 — 141.51  
 — 133.86  
 — 130.21  
 — 128.46  
 — 127.68

| Parameter                | Value           |
|--------------------------|-----------------|
| 1 Title                  | SBK032208.3.fid |
| 2 Solvent                | CDCl3           |
| 3 Temperature            | 298.0           |
| 4 Number of Scans        | 1024            |
| 5 Receiver Gain          | 2050.0          |
| 6 Relaxation Delay       | 5.0000          |
| 7 Pulse Width            | 10.6300         |
| 8 Spectrometer Frequency | 150.97          |
| 9 Nucleus                | <sup>13</sup> C |

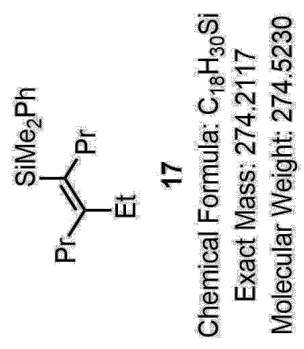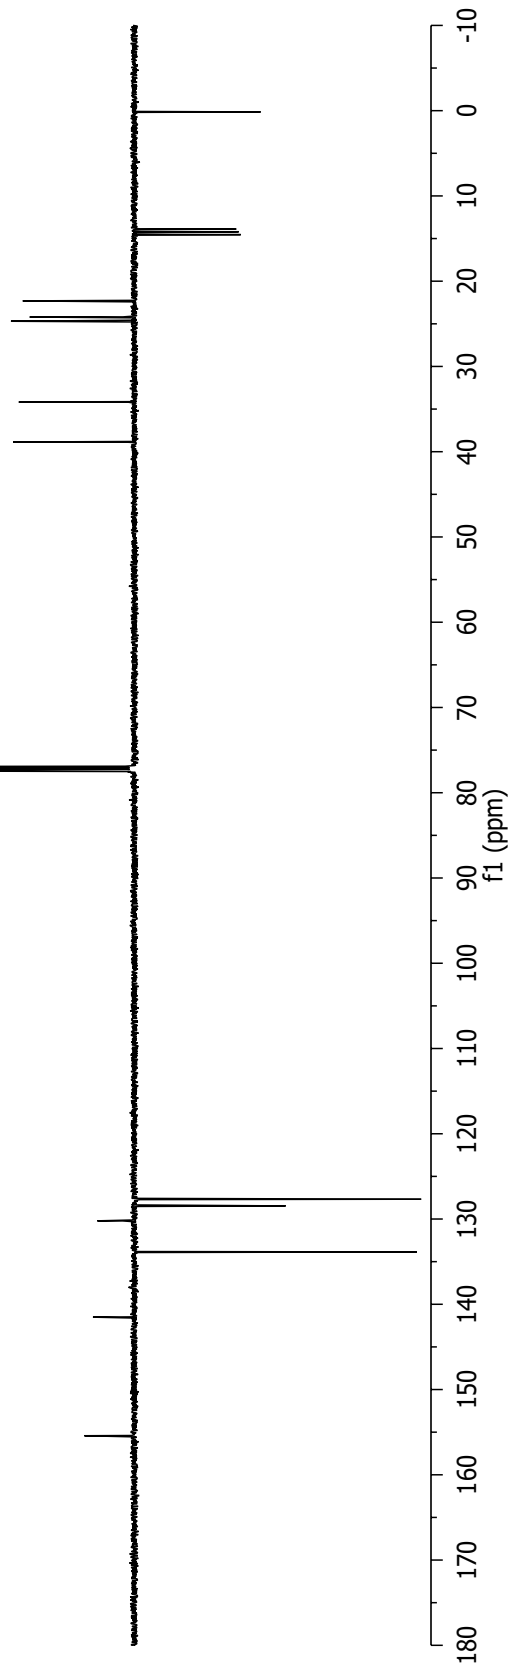

11.23

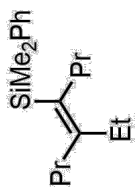

17

Chemical Formula: C<sub>18</sub>H<sub>30</sub>Si  
Exact Mass: 274.2117  
Molecular Weight: 274.5230

| Parameter                | Value             |
|--------------------------|-------------------|
| 1 Title                  | SBK032208.2.fid   |
| 2 Solvent                | CDCl <sub>3</sub> |
| 3 Temperature            | 298.0             |
| 4 Number of Scans        | 256               |
| 5 Receiver Gain          | 1030.0            |
| 6 Relaxation Delay       | 12.5000           |
| 7 Pulse Width            | 13.5000           |
| 8 Spectrometer Frequency | 119.26            |
| 9 Nucleus                | <sup>29</sup> Si  |

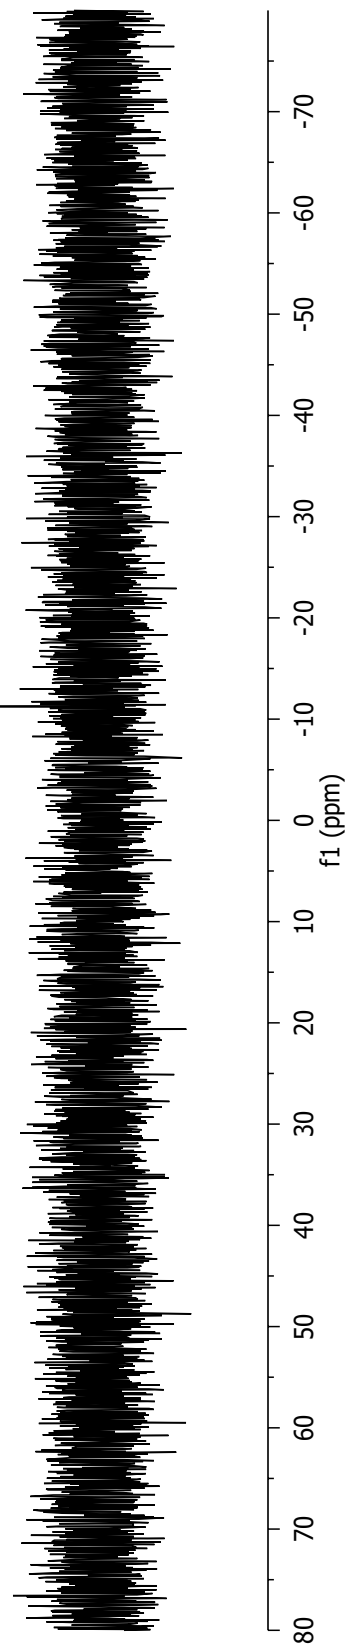

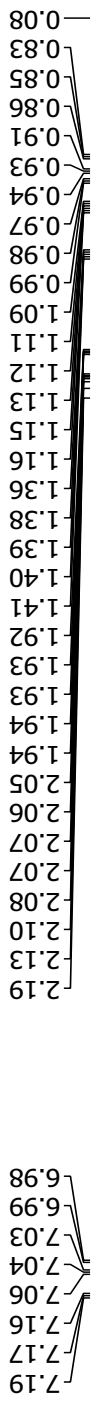

| Parameter                | Value           |
|--------------------------|-----------------|
| 1 Title                  | SBK03215B.1.fid |
| 2 Solvent                | CDCl3           |
| 3 Temperature            | 298.0           |
| 4 Number of Scans        | 16              |
| 5 Receiver Gain          | 128.0           |
| 6 Relaxation Delay       | 1.0000          |
| 7 Pulse Width            | 10.5000         |
| 8 Spectrometer Frequency | 600.32          |
| 9 Nucleus                | 1H              |

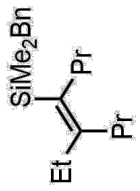

**18**

Chemical Formula: C<sub>19</sub>H<sub>32</sub>Si  
 Exact Mass: 288.2273  
 Molecular Weight: 288.5500

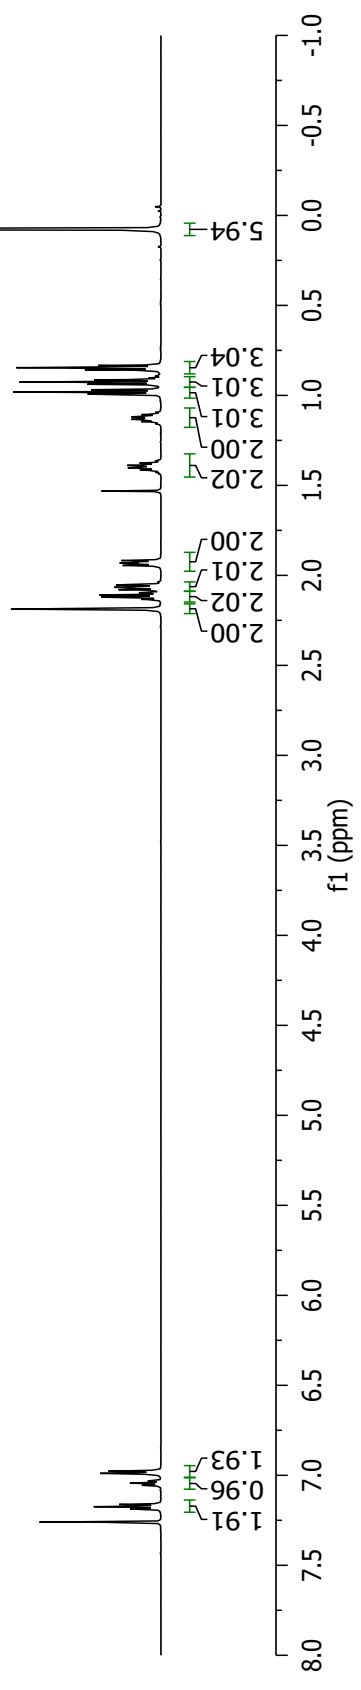



154.24  
140.84  
131.11  
128.46  
128.08  
123.93

| Parameter                | Value           |
|--------------------------|-----------------|
| 1 Title                  | SBK03215B.3.fid |
| 2 Solvent                | CDCl3           |
| 3 Temperature            | 298.0           |
| 4 Number of Scans        | 1024            |
| 5 Receiver Gain          | 2050.0          |
| 6 Relaxation Delay       | 5.0000          |
| 7 Pulse Width            | 10.6300         |
| 8 Spectrometer Frequency | 150.97          |
| 9 Nucleus                | <sup>13</sup> C |

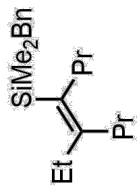

**18**

Chemical Formula: C<sub>19</sub>H<sub>32</sub>Si  
Exact Mass: 288.2273  
Molecular Weight: 288.5500

34.16  
32.98  
29.43  
27.50  
24.43  
22.32  
14.72  
14.54  
14.06  
-0.77

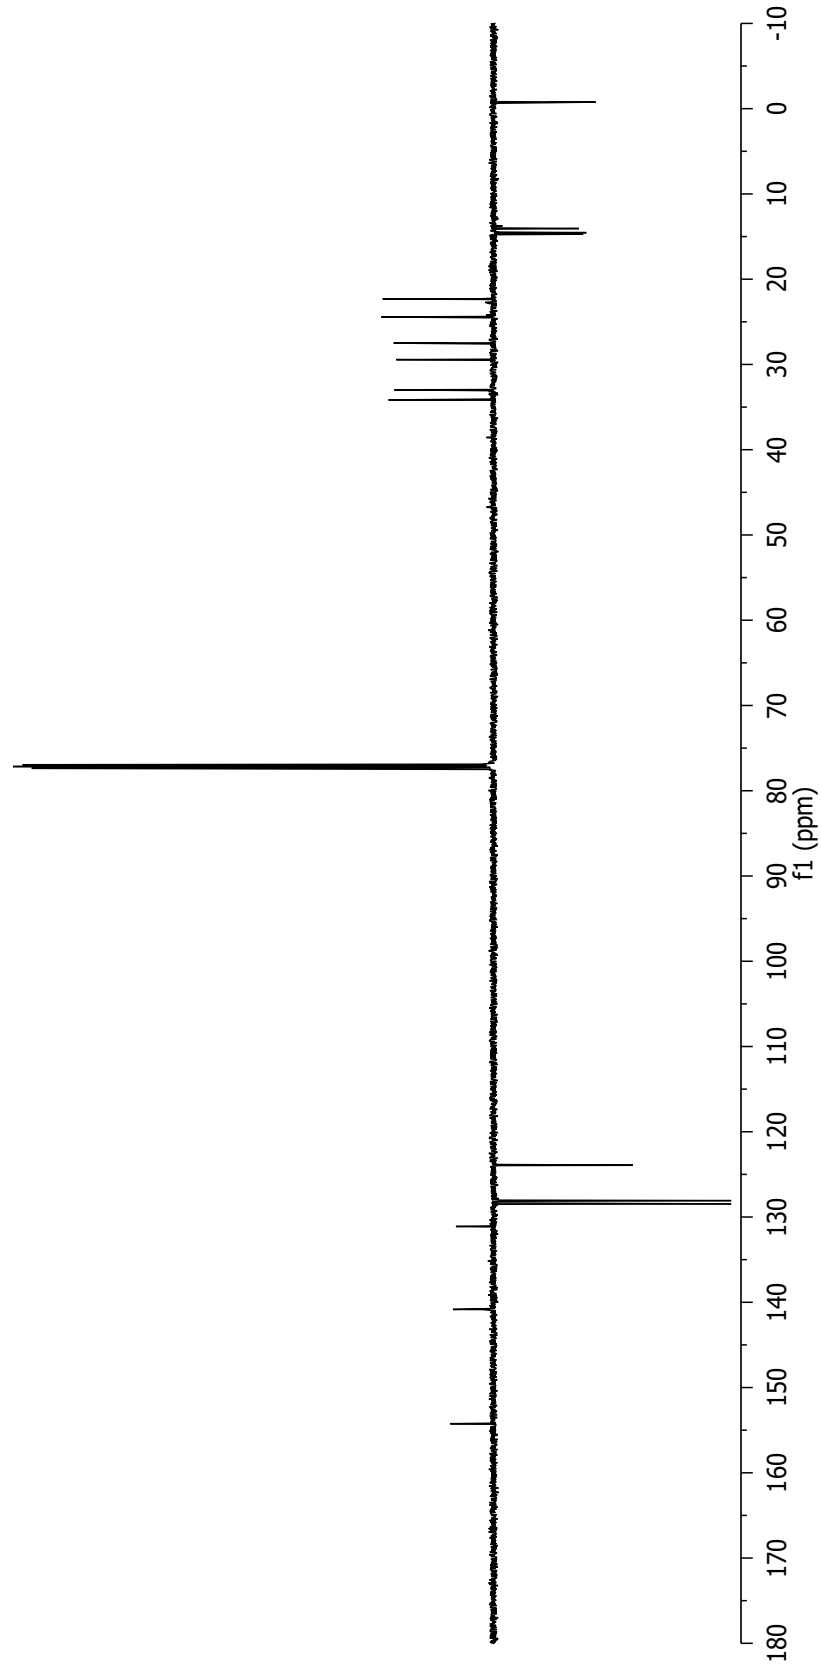

—6.76

| Parameter                | Value           |
|--------------------------|-----------------|
| 1 Title                  | SBK03215B.2.fid |
| 2 Solvent                | CDCl3           |
| 3 Temperature            | 298.0           |
| 4 Number of Scans        | 256             |
| 5 Receiver Gain          | 2050.0          |
| 6 Relaxation Delay       | 12.5000         |
| 7 Pulse Width            | 13.5000         |
| 8 Spectrometer Frequency | 119.26          |
| 9 Nucleus                | 29Si            |

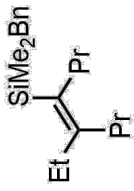

**18**

Chemical Formula:  $C_{19}H_{32}Si$

Exact Mass: 288.2273

Molecular Weight: 288.5500

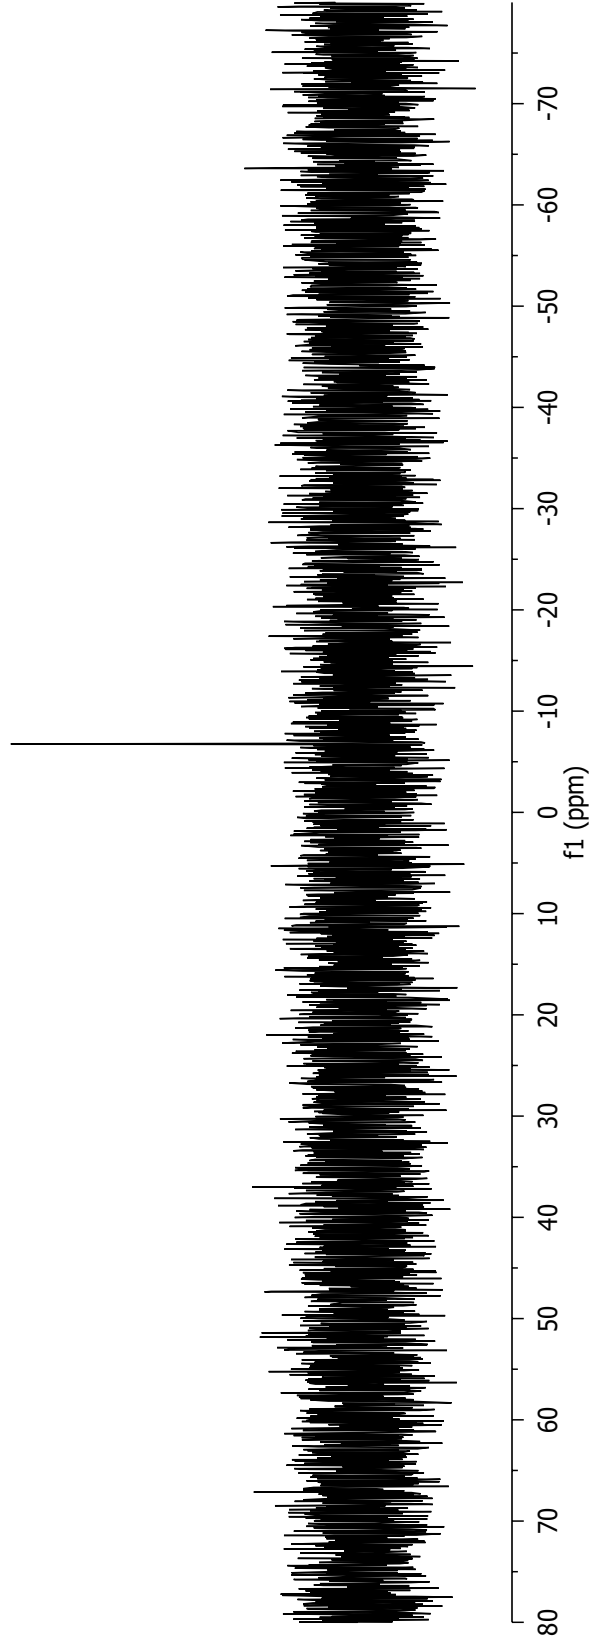

| Parameter                | Value           |
|--------------------------|-----------------|
| 1 Title                  | SBK03222C.1.fid |
| 2 Solvent                | CDCl3           |
| 3 Temperature            | 298.0           |
| 4 Number of Scans        | 16              |
| 5 Receiver Gain          | 144.0           |
| 6 Relaxation Delay       | 1.0000          |
| 7 Pulse Width            | 10.5000         |
| 8 Spectrometer Frequency | 600.32          |
| 9 Nucleus                | <sup>1</sup> H  |

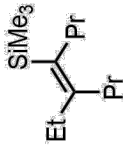

**19**

Chemical Formula: C<sub>13</sub>H<sub>28</sub>Si

Exact Mass: 212.1960

Molecular Weight: 212.4520

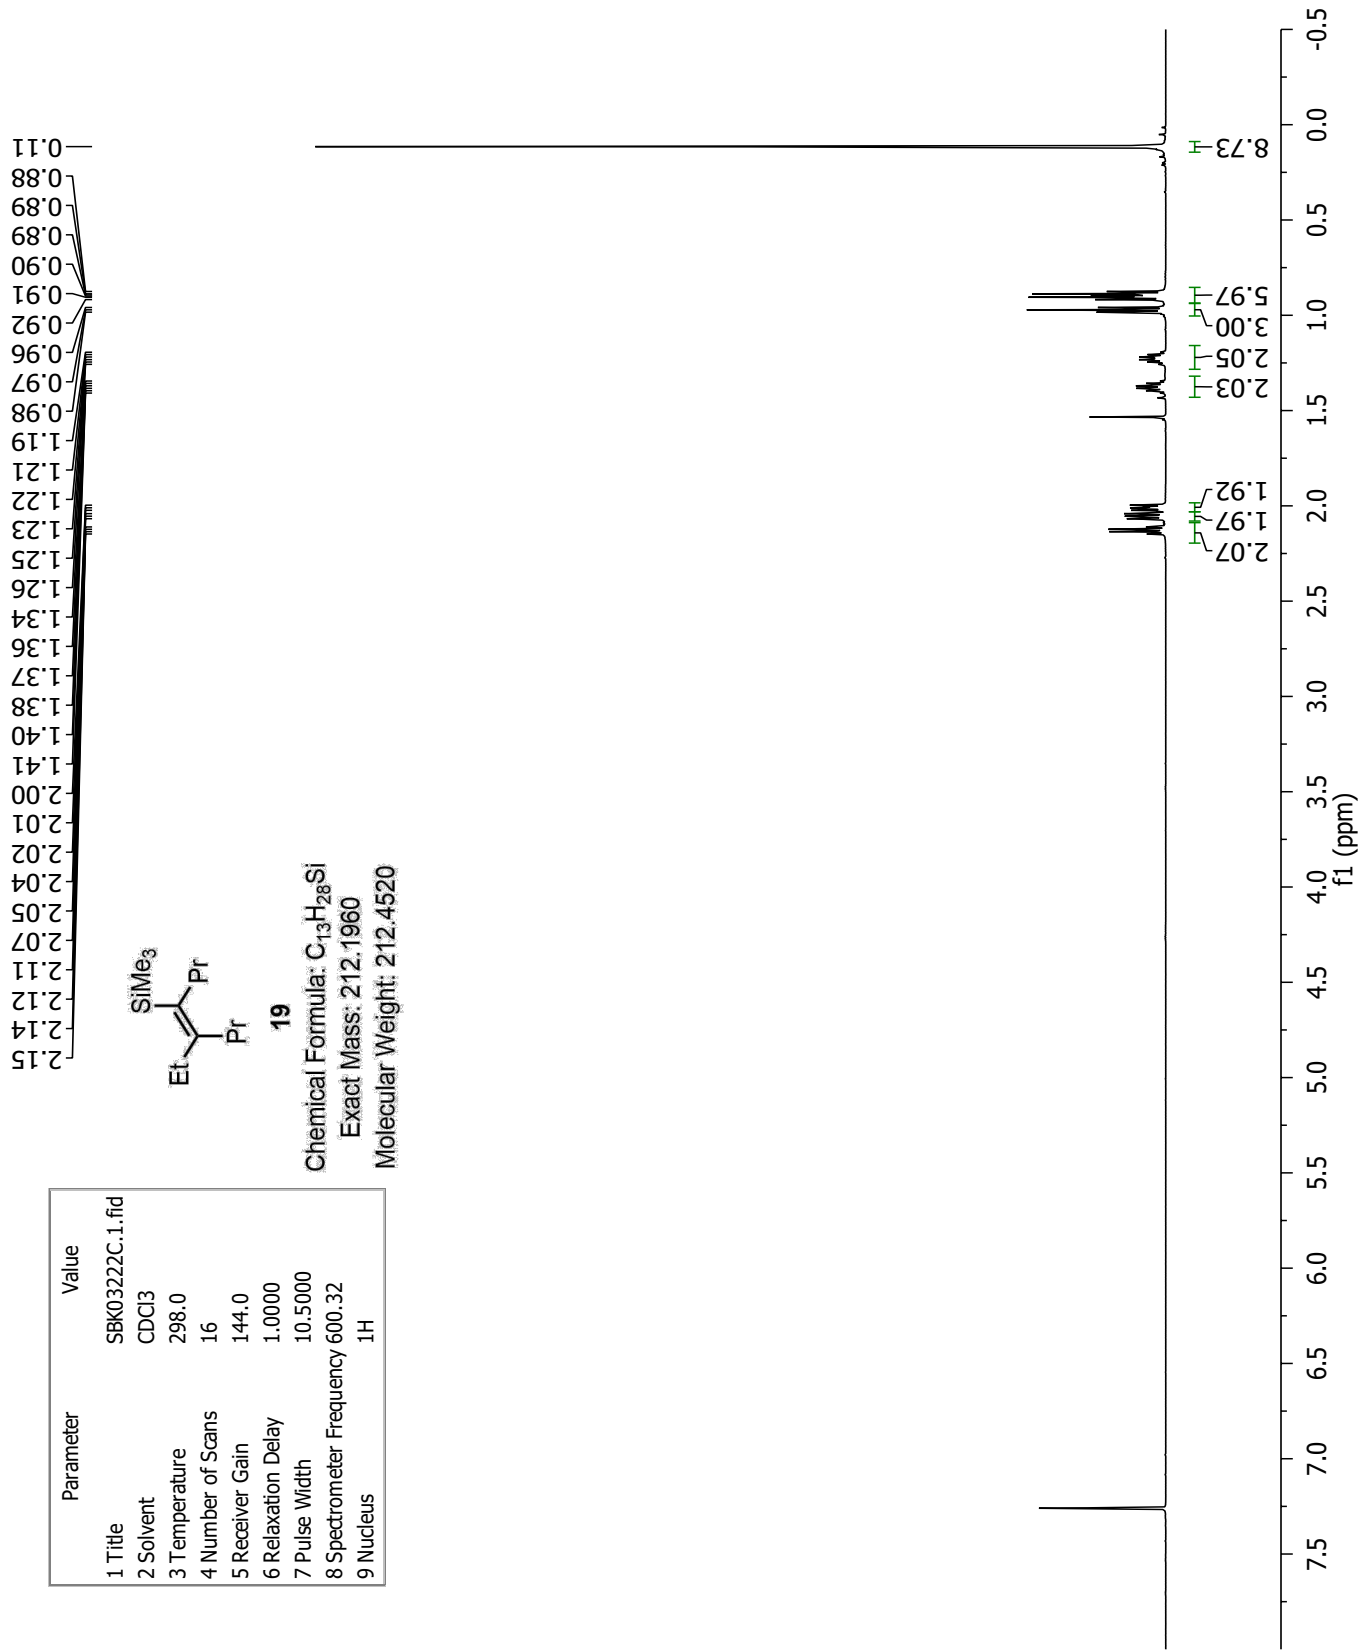

— 1.32  
 { 14.13  
 { 14.51  
 { 14.64  
 { 22.39  
 { 24.59  
 { 29.29  
 { 32.88  
 { 34.11

| Parameter                | Value           |
|--------------------------|-----------------|
| 1 Title                  | SBK03222C.3.fid |
| 2 Solvent                | CDCl3           |
| 3 Temperature            | 298.0           |
| 4 Number of Scans        | 1024            |
| 5 Receiver Gain          | 2050.0          |
| 6 Relaxation Delay       | 5.0000          |
| 7 Pulse Width            | 10.6300         |
| 8 Spectrometer Frequency | 150.97          |
| 9 Nucleus                | <sup>13</sup> C |

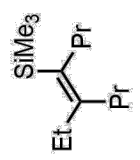

**19**  
 Chemical Formula: C<sub>13</sub>H<sub>28</sub>Si  
 Exact Mass: 212.1960  
 Molecular Weight: 212.4520

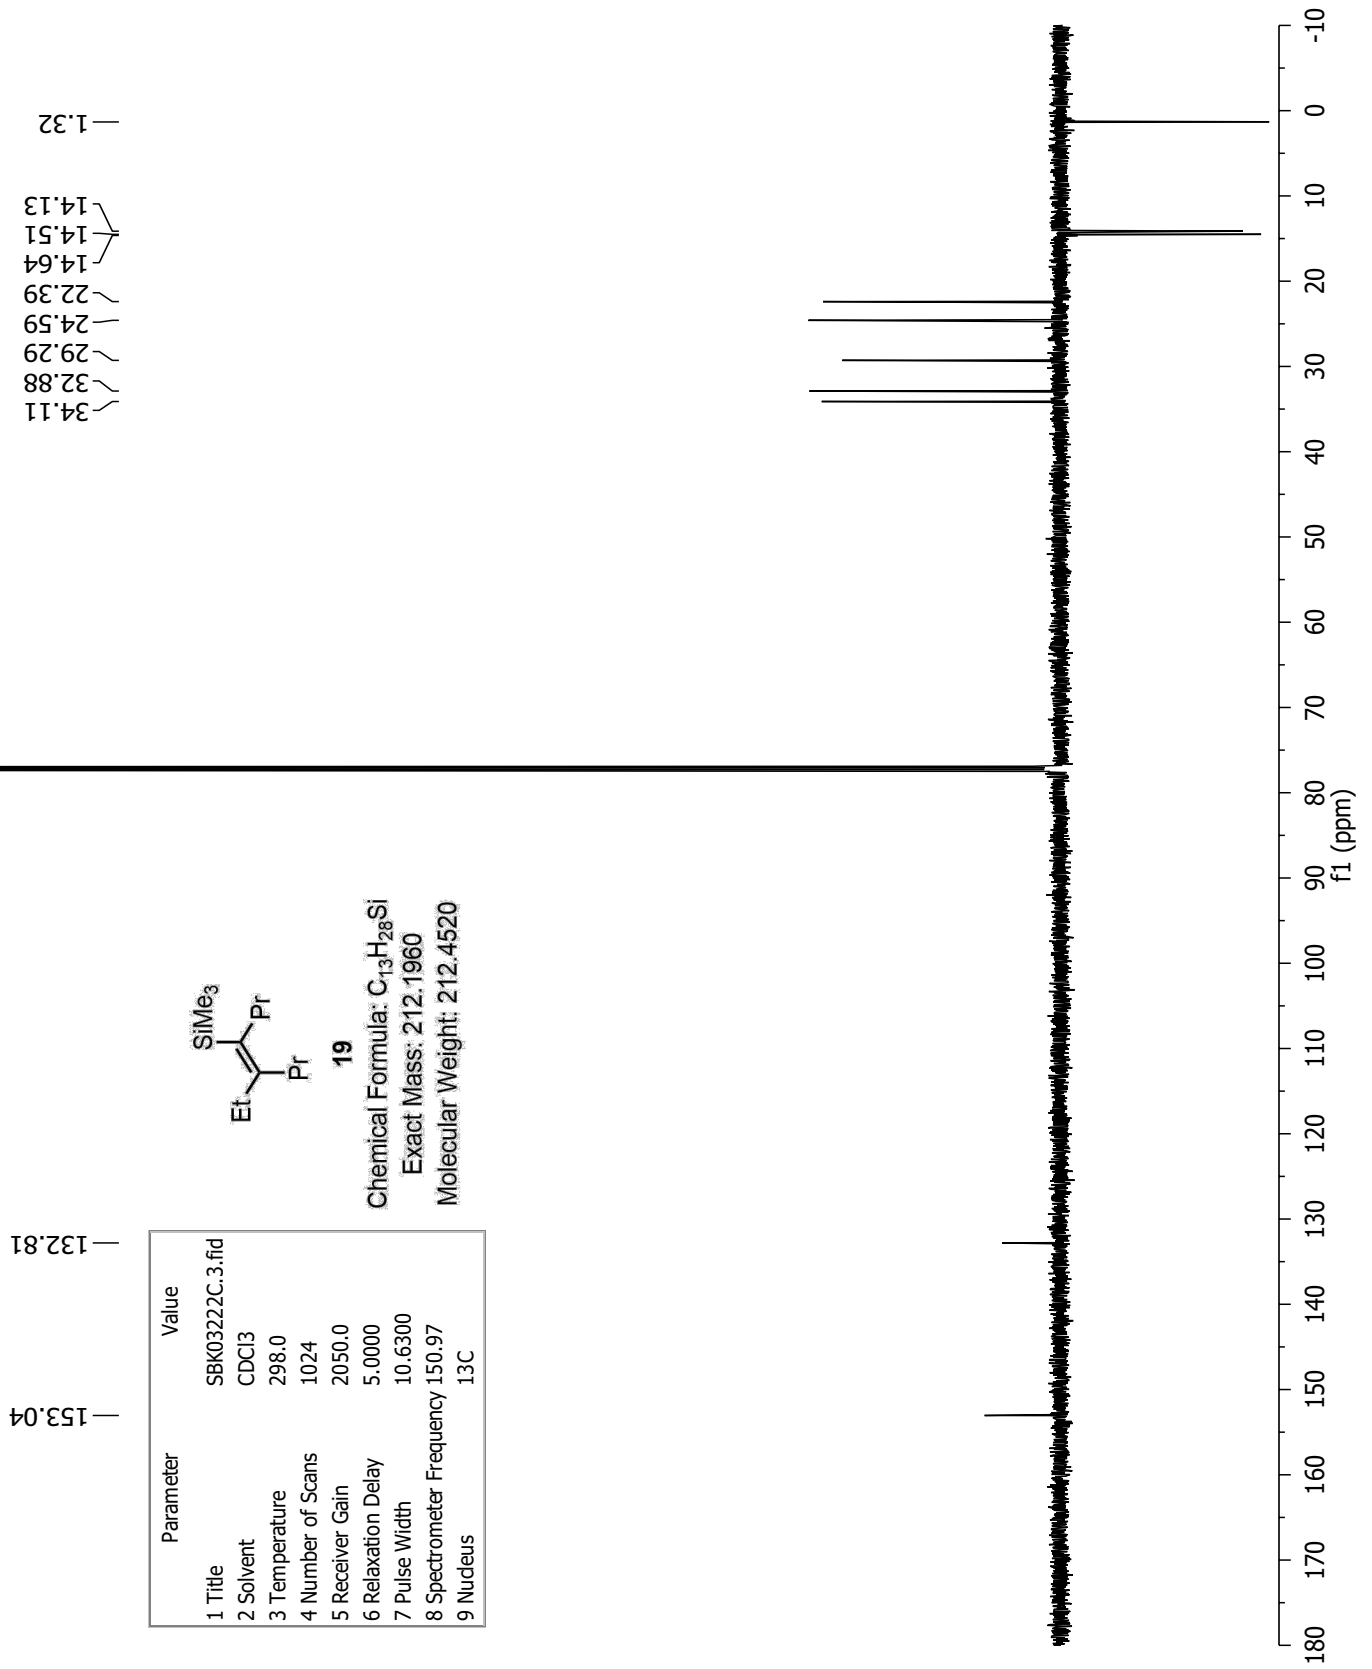

—7.92

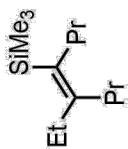

**19**

Chemical Formula: C<sub>13</sub>H<sub>28</sub>Si  
Exact Mass: 212.1960  
Molecular Weight: 212.4520

| Parameter                | Value             |
|--------------------------|-------------------|
| 1 Title                  | SBK03222C.2.fid   |
| 2 Solvent                | CDCl <sub>3</sub> |
| 3 Temperature            | 298.0             |
| 4 Number of Scans        | 256               |
| 5 Receiver Gain          | 2050.0            |
| 6 Relaxation Delay       | 12.5000           |
| 7 Pulse Width            | 13.5000           |
| 8 Spectrometer Frequency | 119.26            |
| 9 Nucleus                | <sup>29</sup> Si  |

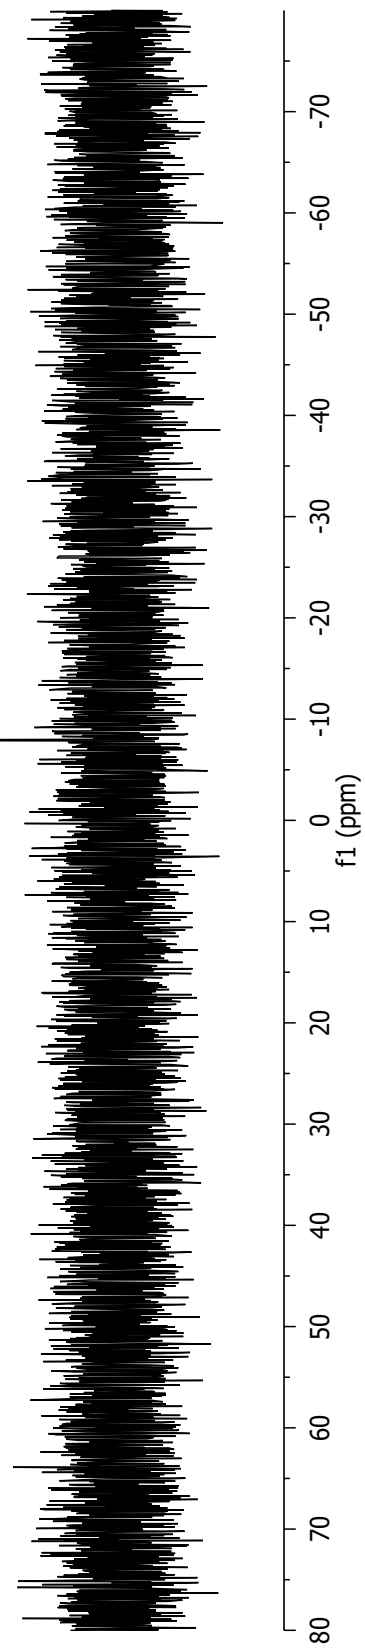

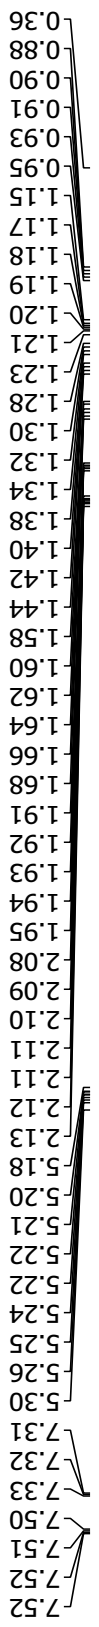

| Parameter                | Value               |
|--------------------------|---------------------|
| 1 Title                  | MFW02184col4A.1.fid |
| 2 Solvent                | CDCl3               |
| 3 Temperature            | 298.2               |
| 4 Number of Scans        | 16                  |
| 5 Receiver Gain          | 4.0                 |
| 6 Relaxation Delay       | 1.0000              |
| 7 Pulse Width            | 15.0000             |
| 8 Spectrometer Frequency | 400.13              |
| 9 Nucleus                | 1H                  |

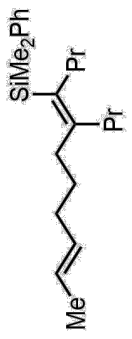

**20**

Chemical Formula: C<sub>22</sub>H<sub>30</sub>Si  
 Exact Mass: 328.2586  
 Molecular Weight: 328.6150

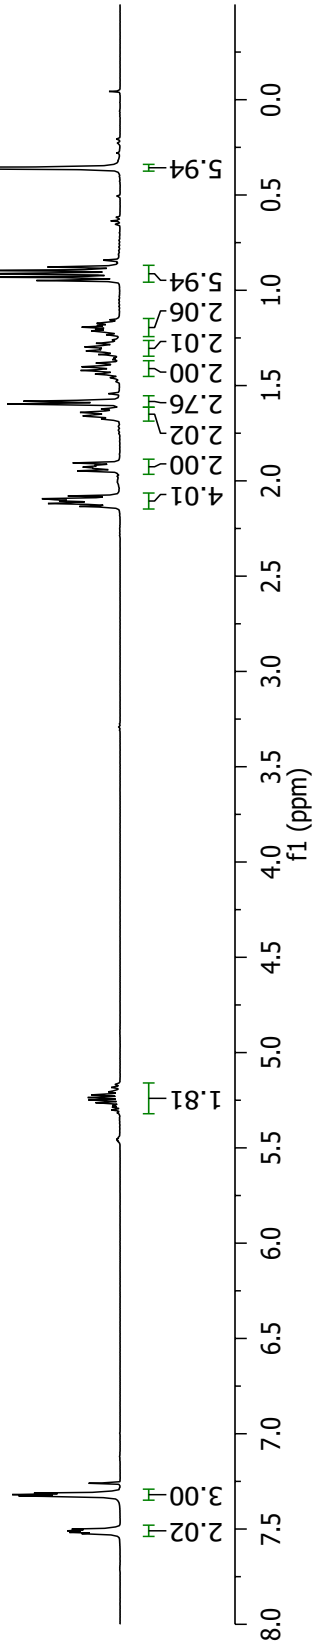

153.65  
141.53  
133.83  
131.41  
130.97  
128.46  
127.68  
124.86

| Parameter                | Value               |
|--------------------------|---------------------|
| 1 Title                  | MFW02184col4A.2.fid |
| 2 Solvent                | CDCl3               |
| 3 Temperature            | 298.2               |
| 4 Number of Scans        | 256                 |
| 5 Receiver Gain          | 512.0               |
| 6 Relaxation Delay       | 3.0000              |
| 7 Pulse Width            | 10.7000             |
| 8 Spectrometer Frequency | 100.62              |
| 9 Nucleus                | <sup>13</sup> C     |

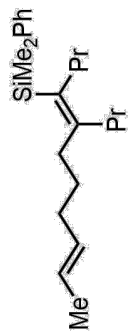

**20**

Chemical Formula: C<sub>22</sub>H<sub>38</sub>Si  
Exact Mass: 328.2586  
Molecular Weight: 328.6150

36.84  
34.23  
33.36  
32.92  
29.12  
24.65  
22.36  
18.04  
14.64  
14.55  
0.08

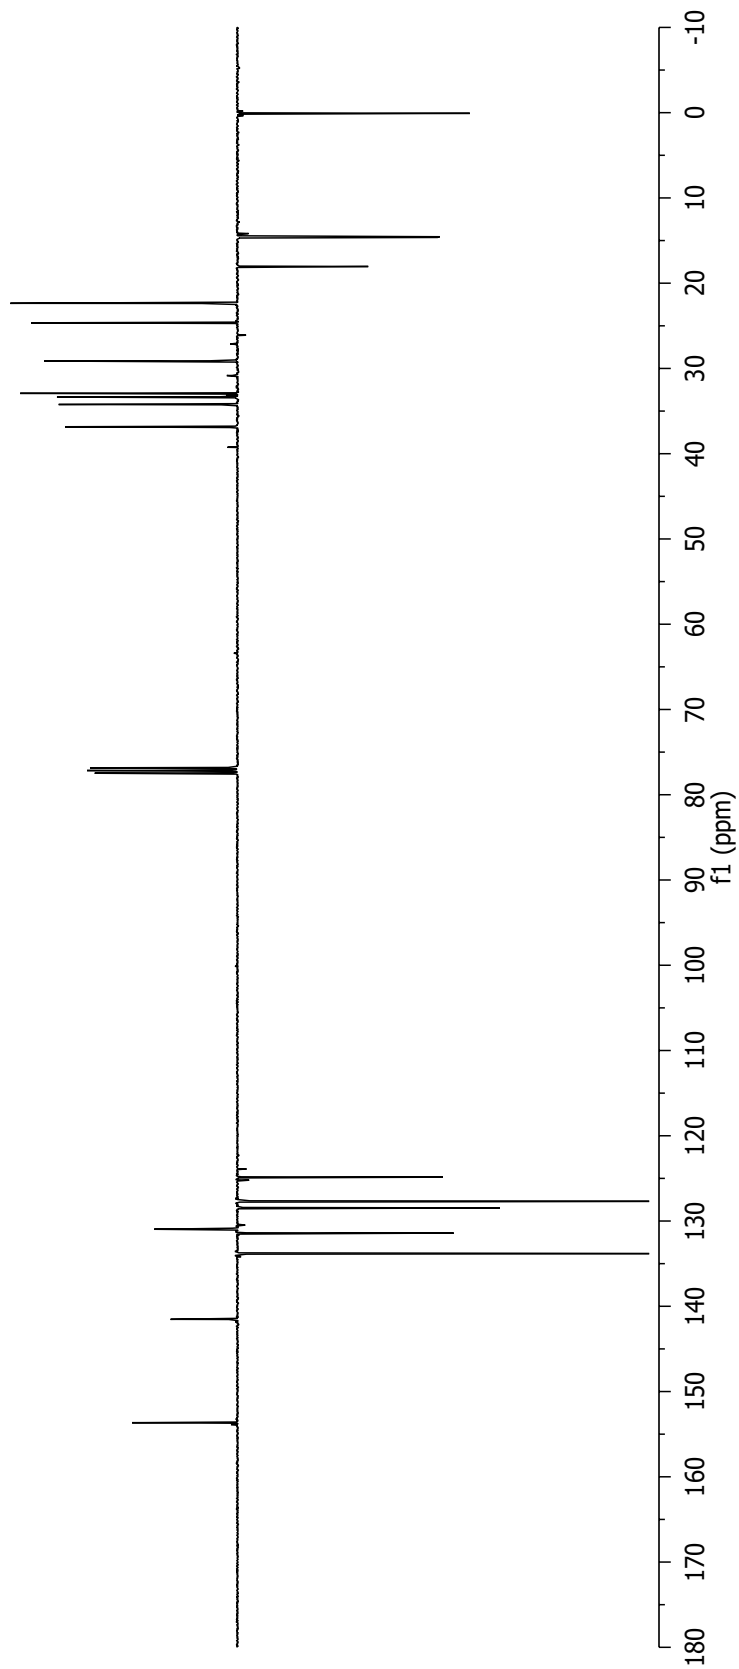

11.17

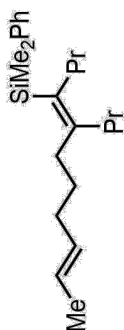

**20**

Chemical Formula: C<sub>22</sub>H<sub>36</sub>Si

Exact Mass: 328.2586

Molecular Weight: 328.6150

| Parameter                | Value               |
|--------------------------|---------------------|
| 1 Title                  | MFW02184col3A.2.fid |
| 2 Solvent                | CDCl <sub>3</sub>   |
| 3 Temperature            | 300.0               |
| 4 Number of Scans        | 254                 |
| 5 Receiver Gain          | 1030.0              |
| 6 Relaxation Delay       | 12.5000             |
| 7 Pulse Width            | 13.5000             |
| 8 Spectrometer Frequency | 119.26              |
| 9 Nucleus                | <sup>29</sup> Si    |

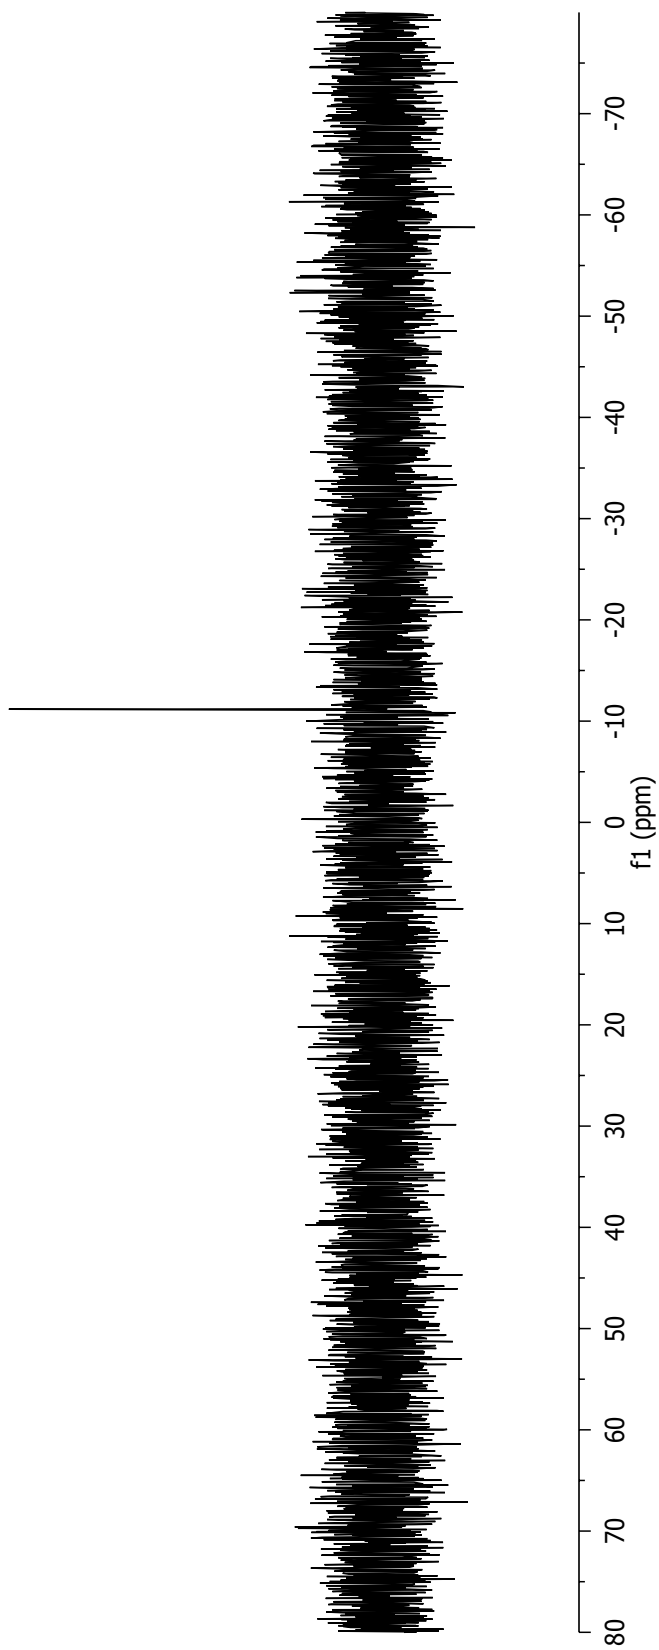



7.51  
7.50  
7.50  
7.49  
7.48  
7.31  
7.30  
7.29  
7.29  
7.28  
2.12  
2.10  
2.10  
2.09  
2.08  
2.07  
2.07  
2.05  
1.95  
1.94  
1.93  
1.92  
1.91  
1.44  
1.43  
1.42  
1.42  
1.41  
1.40  
1.40  
1.39  
1.39  
1.38  
1.31  
1.30  
1.29  
1.28  
1.27  
1.26  
1.25  
1.24  
1.24  
1.23  
1.22  
1.19  
0.93  
0.92  
0.90  
0.88  
0.86  
0.84  
0.51  
0.49  
0.47  
0.35

| Parameter                | Value                   |
|--------------------------|-------------------------|
| 1 Title                  | MFW02181col3A-NoE.1.fid |
| 2 Solvent                | CDCl3                   |
| 3 Temperature            | 298.1                   |
| 4 Number of Scans        | 16                      |
| 5 Receiver Gain          | 8.0                     |
| 6 Relaxation Delay       | 1.0000                  |
| 7 Pulse Width            | 15.0000                 |
| 8 Spectrometer Frequency | 400.13                  |
| 9 Nucleus                | <sup>1</sup> H          |

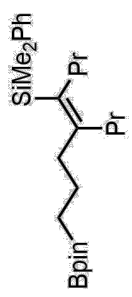

**21**  
 Chemical Formula: C<sub>25</sub>H<sub>43</sub>BO<sub>2</sub>Si  
 Exact Mass: 414.3125  
 Molecular Weight: 414.5120

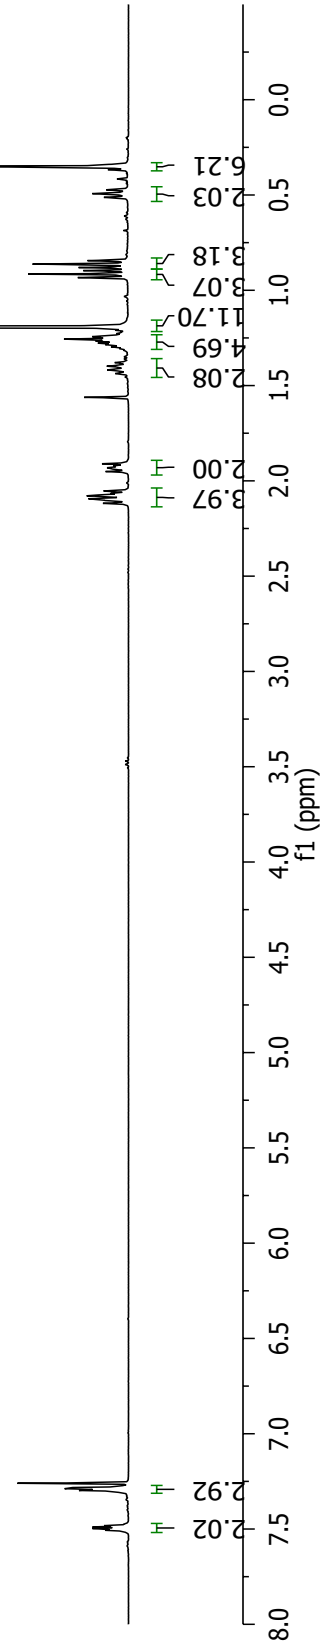

| Parameter                | Value                   |
|--------------------------|-------------------------|
| 1 Title                  | MFW02181col3A-NoE.4.fid |
| 2 Solvent                | CDCl3                   |
| 3 Temperature            | 298.2                   |
| 4 Number of Scans        | 256                     |
| 5 Receiver Gain          | 512.0                   |
| 6 Relaxation Delay       | 3.0000                  |
| 7 Pulse Width            | 10.7000                 |
| 8 Spectrometer Frequency | 100.62                  |
| 9 Nucleus                | <sup>13</sup> C         |

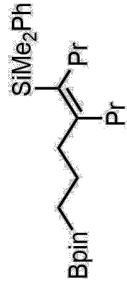

**21**

Chemical Formula: C<sub>25</sub>H<sub>43</sub>BO<sub>2</sub>Si  
 Exact Mass: 414.3125  
 Molecular Weight: 414.5120

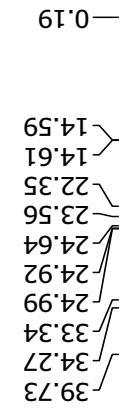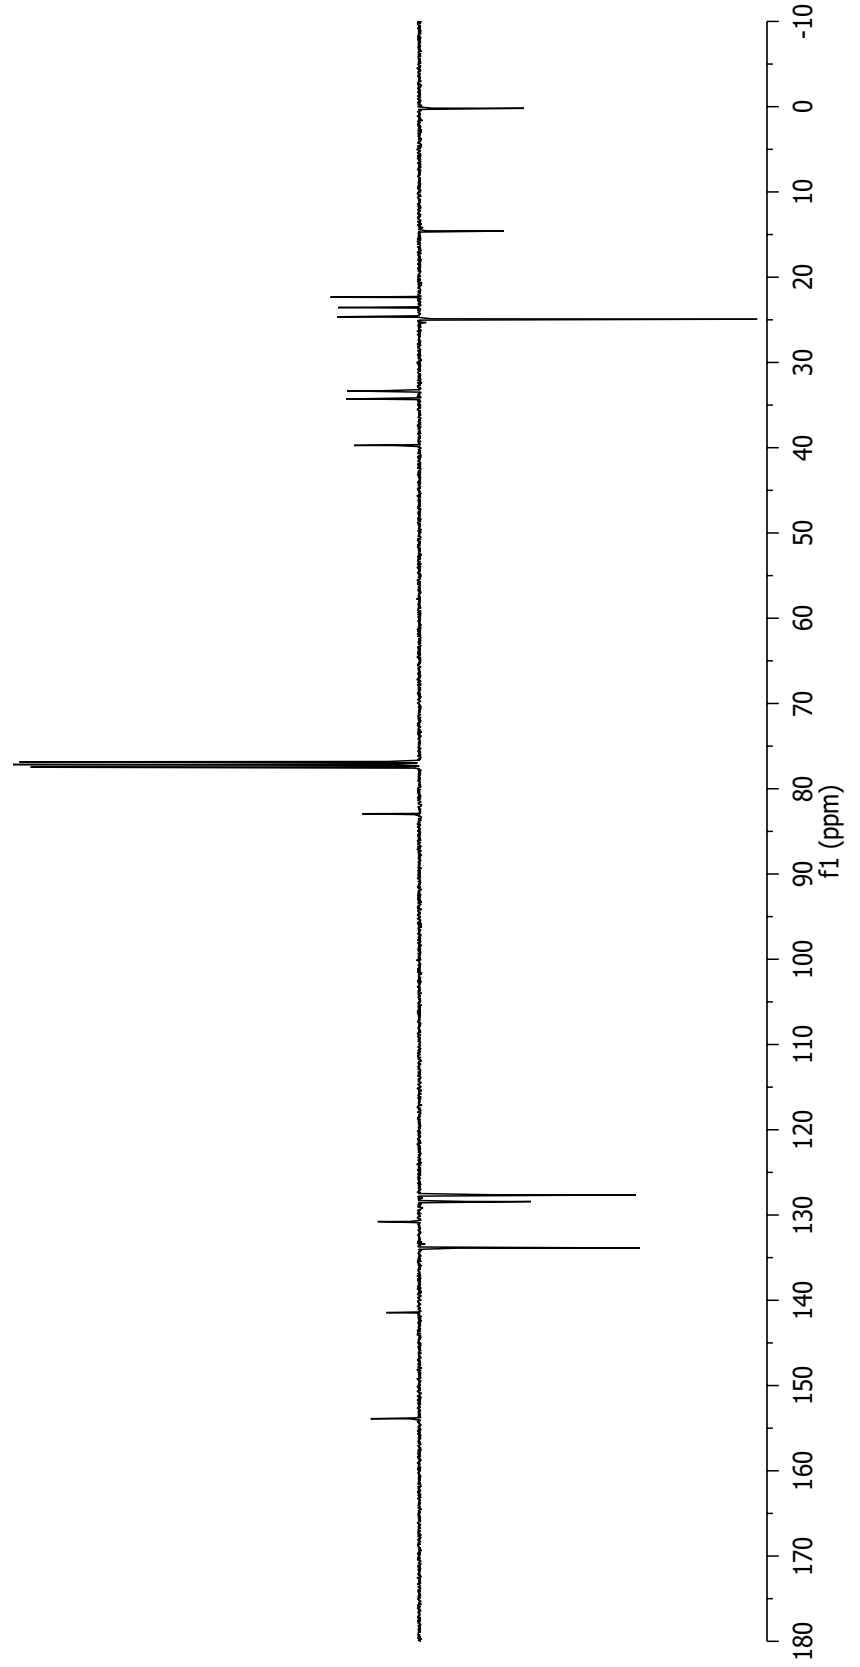

| Parameter                | Value               |
|--------------------------|---------------------|
| 1 Title                  | MFW02181col3A.2.fid |
| 2 Solvent                | CDCl3               |
| 3 Temperature            | 300.0               |
| 4 Number of Scans        | 254                 |
| 5 Receiver Gain          | 1030.0              |
| 6 Relaxation Delay       | 12.5000             |
| 7 Pulse Width            | 13.5000             |
| 8 Spectrometer Frequency | 119.26              |
| 9 Nucleus                | 29Si                |

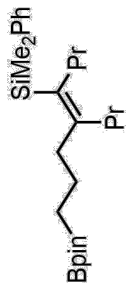

**21**

Chemical Formula: C<sub>25</sub>H<sub>43</sub>BO<sub>2</sub>Si  
 Exact Mass: 414.3125  
 Molecular Weight: 414.5120

—11.21

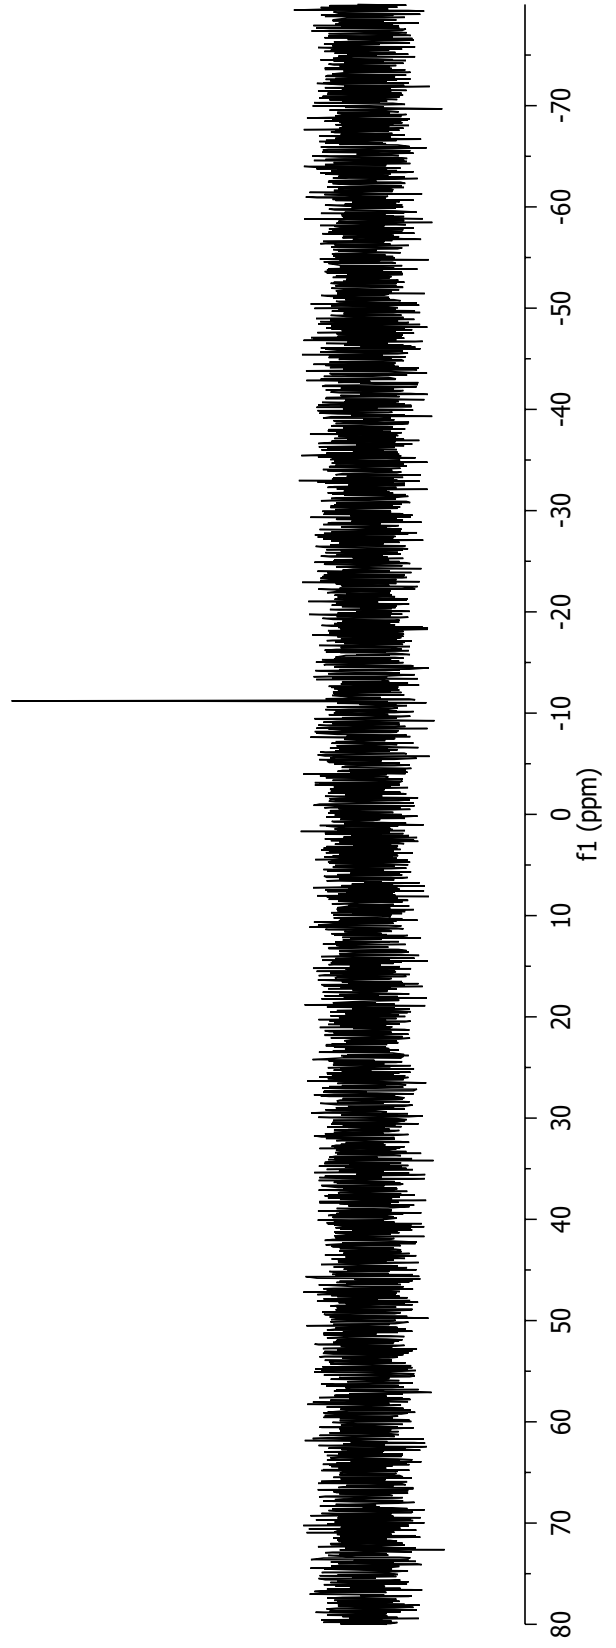

| Parameter                | Value               |
|--------------------------|---------------------|
| 1 Title                  | MFW02181co13A_4.fid |
| 2 Solvent                | CDCl3               |
| 3 Temperature            | 297.2               |
| 4 Number of Scans        | 254                 |
| 5 Receiver Gain          | 322.0               |
| 6 Relaxation Delay       | 1.0000              |
| 7 Pulse Width            | 11.0000             |
| 8 Spectrometer Frequency | 192.61              |
| 9 Nucleus                | 11B                 |

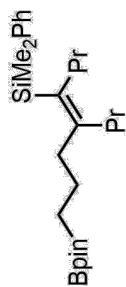

**21**

Chemical Formula: C<sub>25</sub>H<sub>43</sub>BO<sub>2</sub>Si

Exact Mass: 414.3125

Molecular Weight: 414.5120

—34.18

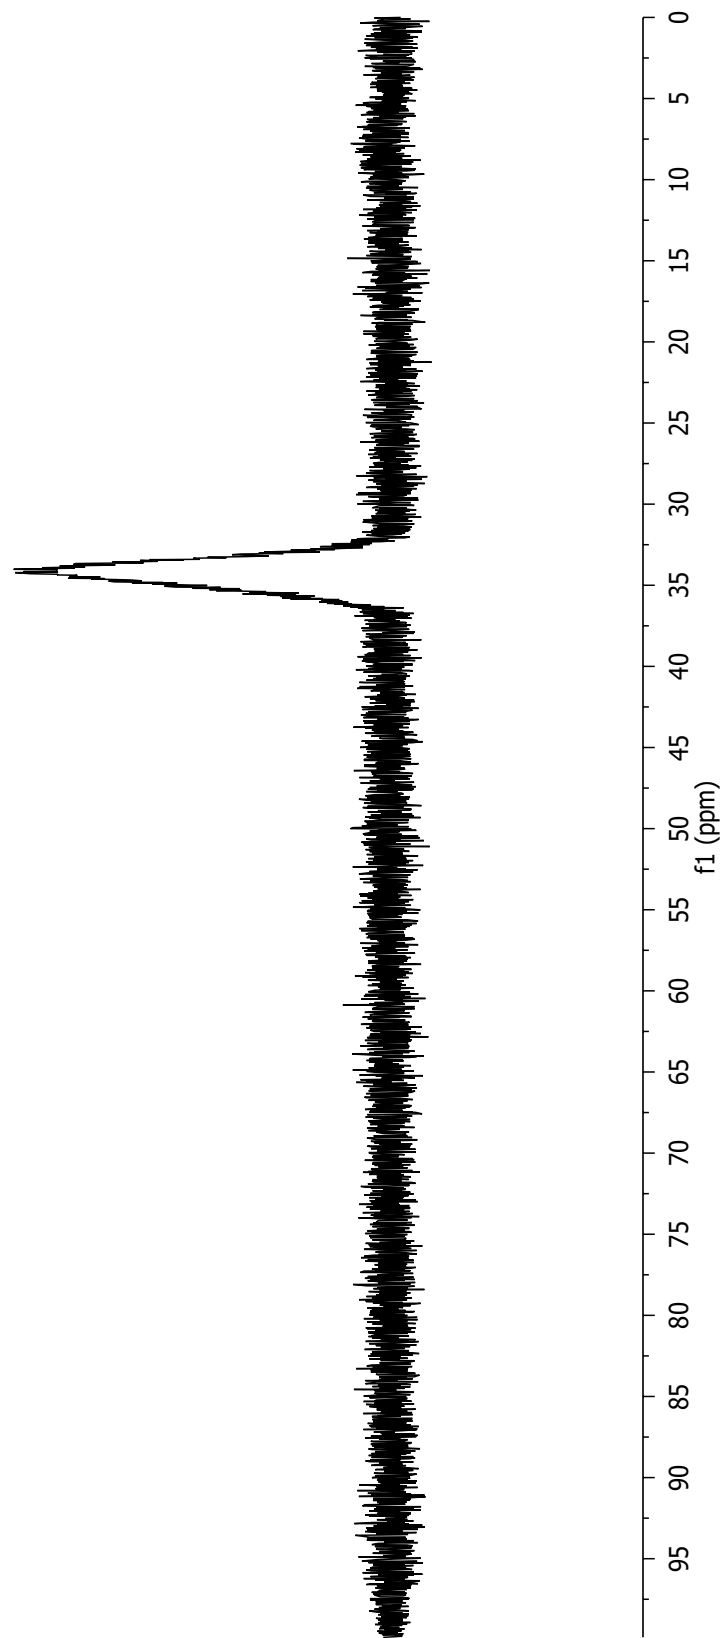

7.31  
7.30  
7.29  
7.28  
7.28  
7.25  
7.24  
7.23  
7.22  
7.22  
7.21  
7.21  
7.20  
7.20  
7.19  
7.19  
7.18  
7.17  
7.13  
7.12  
7.11  
7.11  
7.10  
7.06  
7.01  
7.01  
6.99  
6.99  
2.71  
2.69  
2.67  
2.43  
2.41  
2.39  
2.35  
2.33  
2.33  
2.29  
2.28  
2.28  
2.26  
2.24  
2.19  
2.18  
2.15  
1.37  
0.96  
0.95  
0.93  
0.17  
0.17  
0.16

| Parameter                | Value                   |
|--------------------------|-------------------------|
| 1 Title                  | MFW02119col2A-dry.1.fid |
| 2 Solvent                | CDCl3                   |
| 3 Temperature            | 298.2                   |
| 4 Number of Scans        | 16                      |
| 5 Receiver Gain          | 11.3                    |
| 6 Relaxation Delay       | 1.0000                  |
| 7 Pulse Width            | 15.0000                 |
| 8 Spectrometer Frequency | 400.13                  |
| 9 Nucleus                | <sup>1</sup> H          |

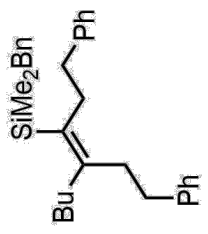

**22**

Chemical Formula: C<sub>31</sub>H<sub>40</sub>Si  
 Exact Mass: 440.2899  
 Molecular Weight: 440.7460

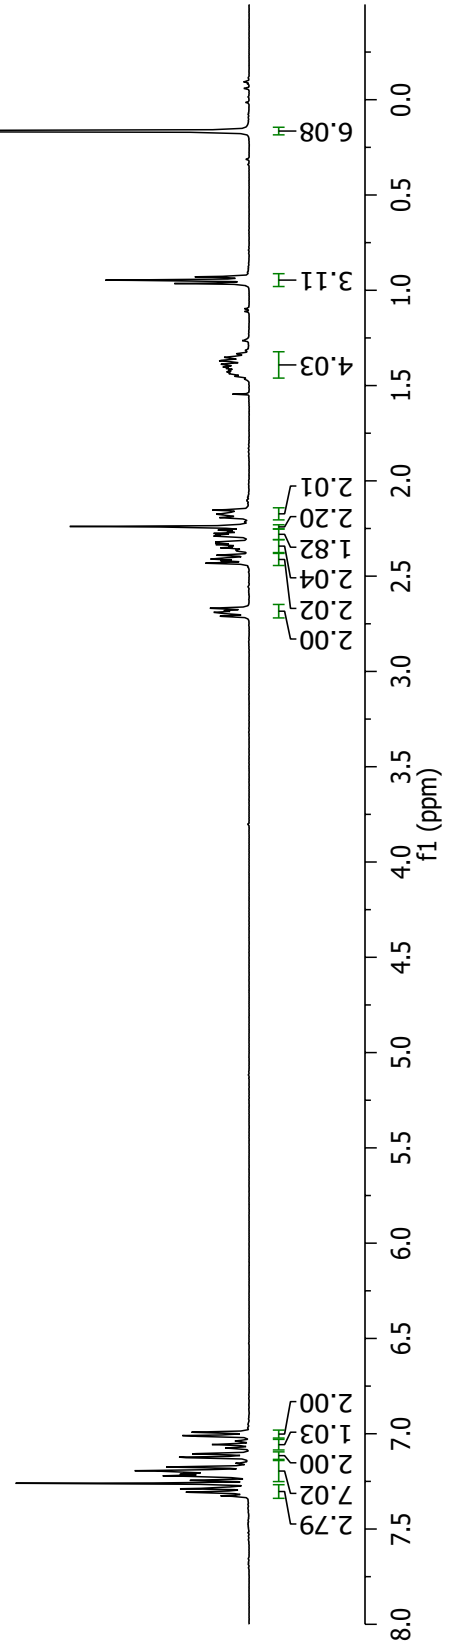

153.12  
142.61  
142.55  
140.52  
131.38  
128.55  
128.46  
128.46  
128.46  
128.38  
128.35  
128.19  
126.02  
125.88  
124.14

| Parameter                | Value                   |
|--------------------------|-------------------------|
| 1 Title                  | MFW02119col2A-dry.2.fid |
| 2 Solvent                | CDCl3                   |
| 3 Temperature            | 298.1                   |
| 4 Number of Scans        | 256                     |
| 5 Receiver Gain          | 512.0                   |
| 6 Relaxation Delay       | 3.0000                  |
| 7 Pulse Width            | 10.7000                 |
| 8 Spectrometer Frequency | 100.62                  |
| 9 Nucleus                | 13C                     |

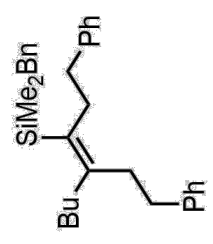

**22**  
 Chemical Formula: C<sub>31</sub>H<sub>40</sub>Si  
 Exact Mass: 440.2899  
 Molecular Weight: 440.7460

37.30  
36.79  
35.48  
34.32  
33.74  
31.81  
27.41  
23.37  
14.34  
-0.65

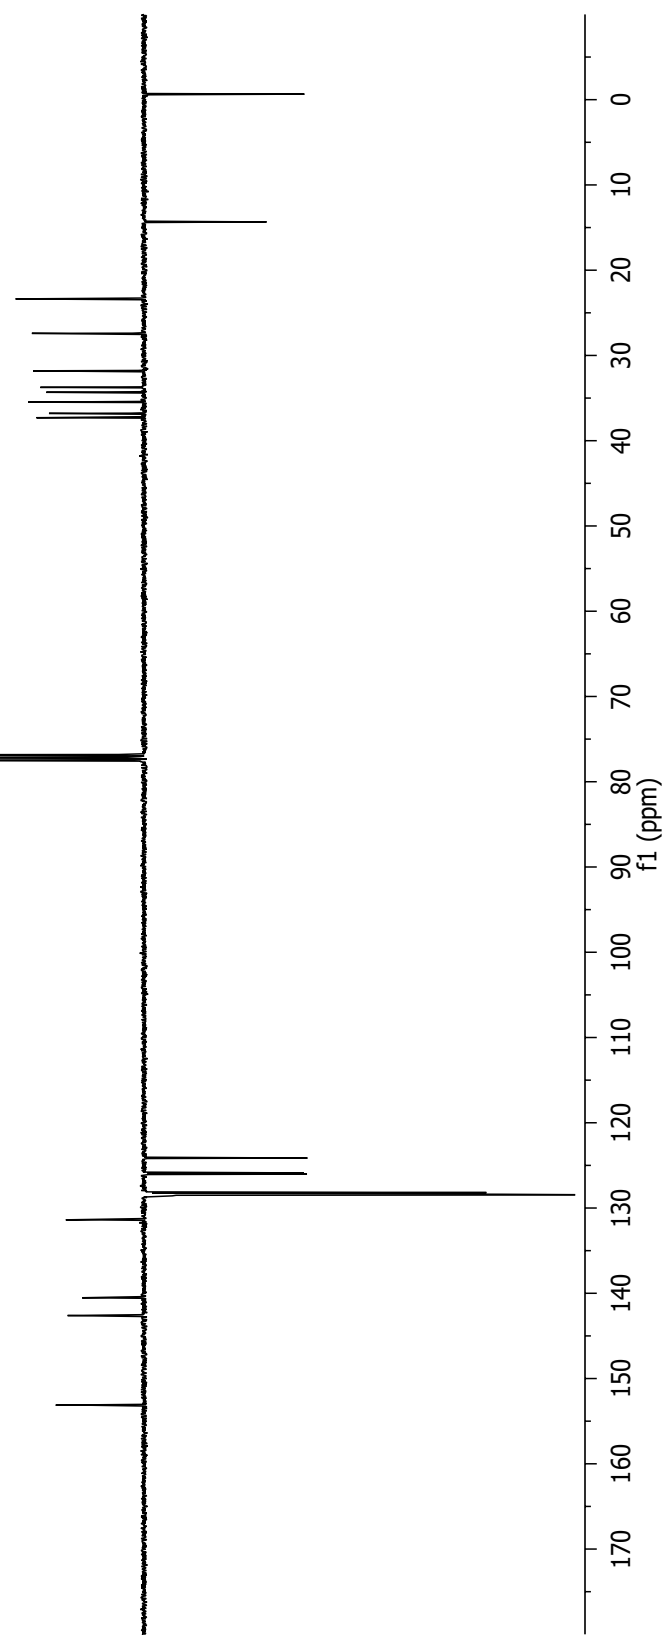

6.33

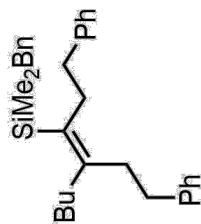

**22**

Chemical Formula:  $C_{31}H_{40}Si$

Exact Mass: 440.2899

Molecular Weight: 440.7460

| Parameter                | Value               |
|--------------------------|---------------------|
| 1 Title                  | MFW02119co12A.2.fid |
| 2 Solvent                | CDCl3               |
| 3 Temperature            | 300.0               |
| 4 Number of Scans        | 254                 |
| 5 Receiver Gain          | 1030.0              |
| 6 Relaxation Delay       | 12.5000             |
| 7 Pulse Width            | 13.5000             |
| 8 Spectrometer Frequency | 119.26              |
| 9 Nucleus                | 29Si                |

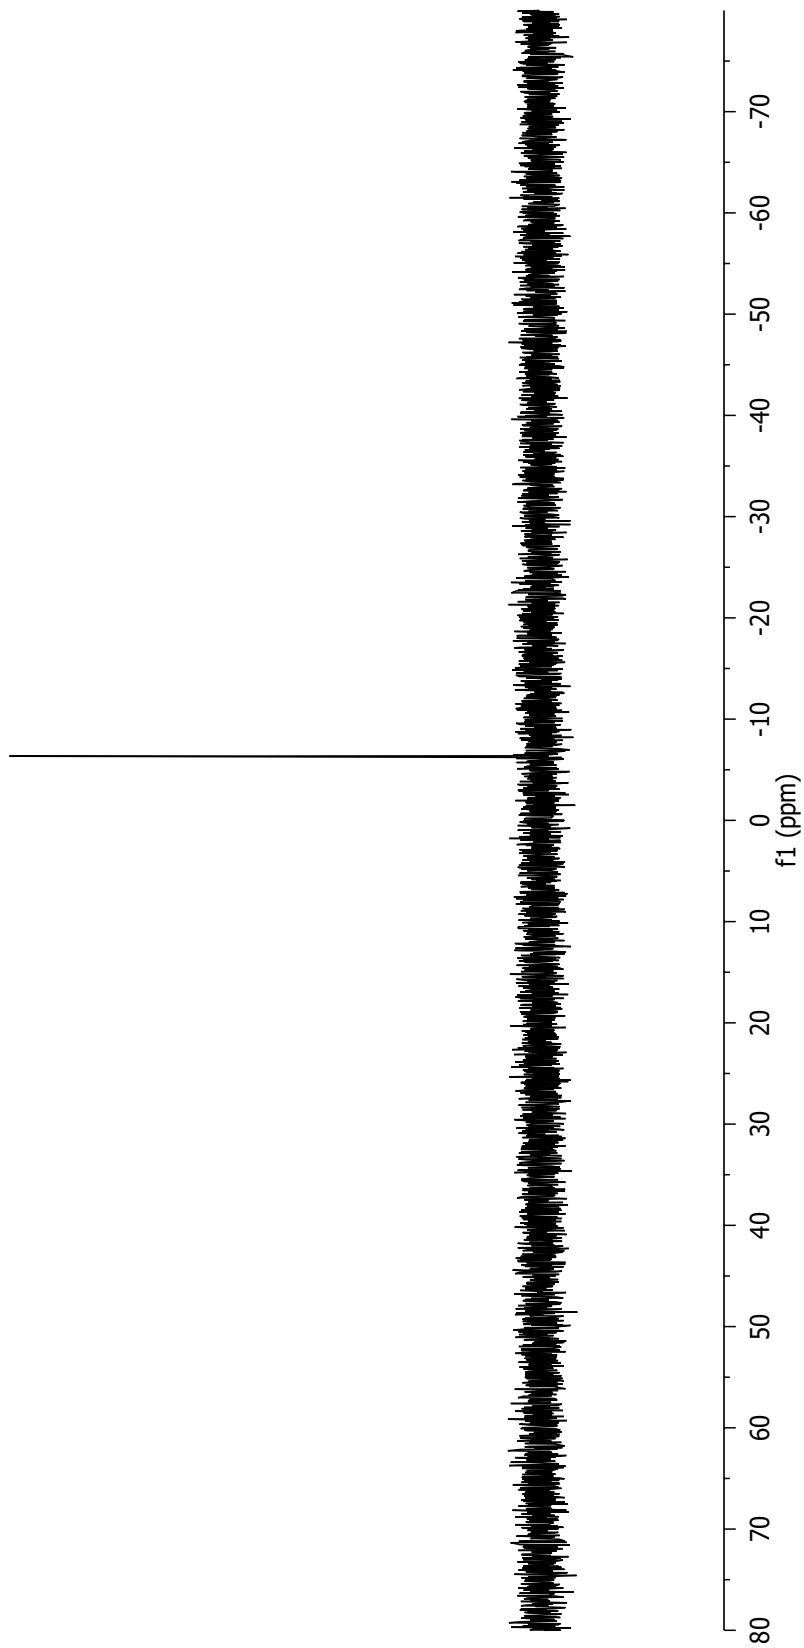

7.32  
7.30  
7.28  
7.22  
7.21  
7.19

| Parameter                | Value                    |
|--------------------------|--------------------------|
| 1 Title                  | MFW02117.co12A-dry.1.fid |
| 2 Solvent                | CDCl3                    |
| 3 Temperature            | 298.2                    |
| 4 Number of Scans        | 16                       |
| 5 Receiver Gain          | 4.0                      |
| 6 Relaxation Delay       | 1.0000                   |
| 7 Pulse Width            | 15.0000                  |
| 8 Spectrometer Frequency | 400.13                   |
| 9 Nucleus                | <sup>1</sup> H           |

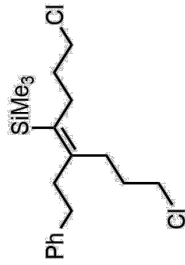

**23**  
 Chemical Formula: C<sub>19</sub>H<sub>30</sub>Cl<sub>2</sub>Si  
 Exact Mass: 356.1494  
 Molecular Weight: 357.4340

3.58  
3.57  
3.55  
3.54  
3.52  
2.71  
2.69  
2.66  
2.45  
2.43  
2.41  
2.37  
2.35  
2.33  
2.27  
2.25  
2.23  
1.94  
1.92  
1.90  
1.88  
1.87  
1.76  
1.74  
1.72  
1.70  
1.69  
0.15

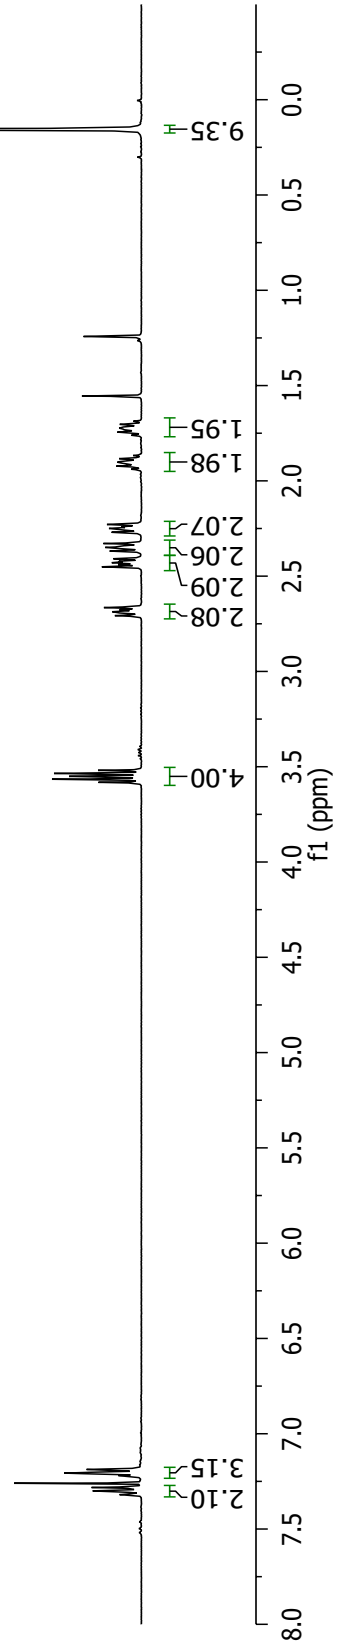



150.19  
142.04  
134.41  
128.61  
128.38  
126.11

| Parameter                | Value                   |
|--------------------------|-------------------------|
| 1 Title                  | MFW02117col2A-dry.2.fid |
| 2 Solvent                | CDCl3                   |
| 3 Temperature            | 298.2                   |
| 4 Number of Scans        | 256                     |
| 5 Receiver Gain          | 512.0                   |
| 6 Relaxation Delay       | 3.0000                  |
| 7 Pulse Width            | 10.7000                 |
| 8 Spectrometer Frequency | 100.62                  |
| 9 Nucleus                | 13C                     |

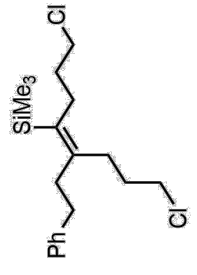

**23**

Chemical Formula: C<sub>19</sub>H<sub>30</sub>Cl<sub>2</sub>Si  
 Exact Mass: 356.1494  
 Molecular Weight: 357.4340

45.30  
45.22  
38.57  
35.80  
34.00  
32.12  
29.35  
28.60  
1.31

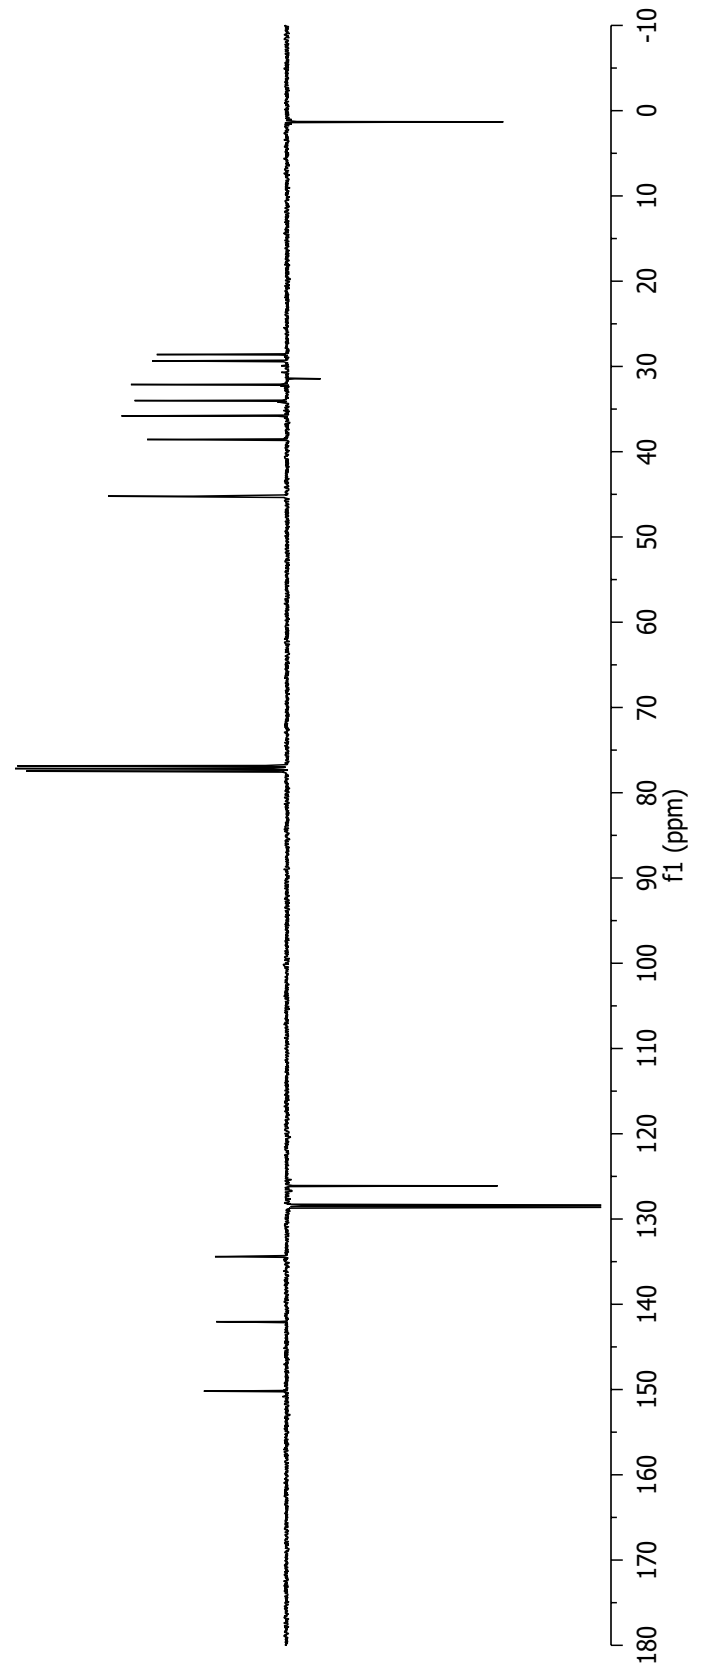

60'Z-

| Parameter                | Value               |
|--------------------------|---------------------|
| 1 Title                  | MFW02117col2A.2.fid |
| 2 Solvent                | CDCl3               |
| 3 Temperature            | 300.0               |
| 4 Number of Scans        | 254                 |
| 5 Receiver Gain          | 2050.0              |
| 6 Relaxation Delay       | 12.5000             |
| 7 Pulse Width            | 13.5000             |
| 8 Spectrometer Frequency | 119.26              |
| 9 Nucleus                | 29Si                |

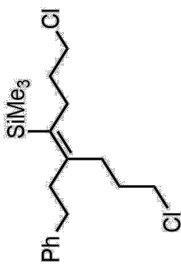

**23**

Chemical Formula:  $C_{19}H_{30}Cl_2Si$   
Exact Mass: 356.1494  
Molecular Weight: 357.4340

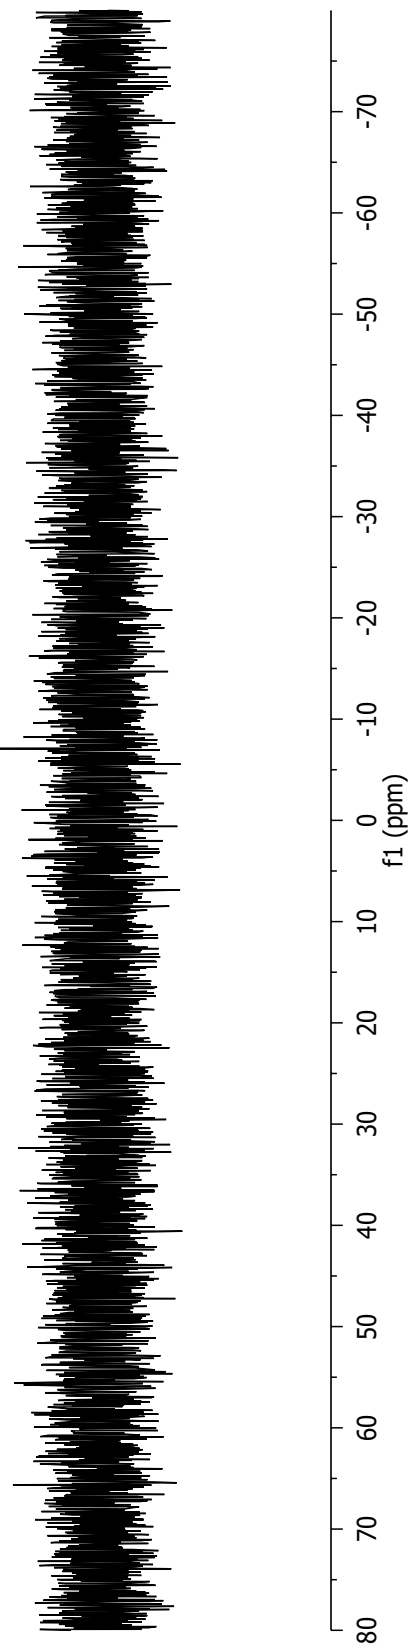

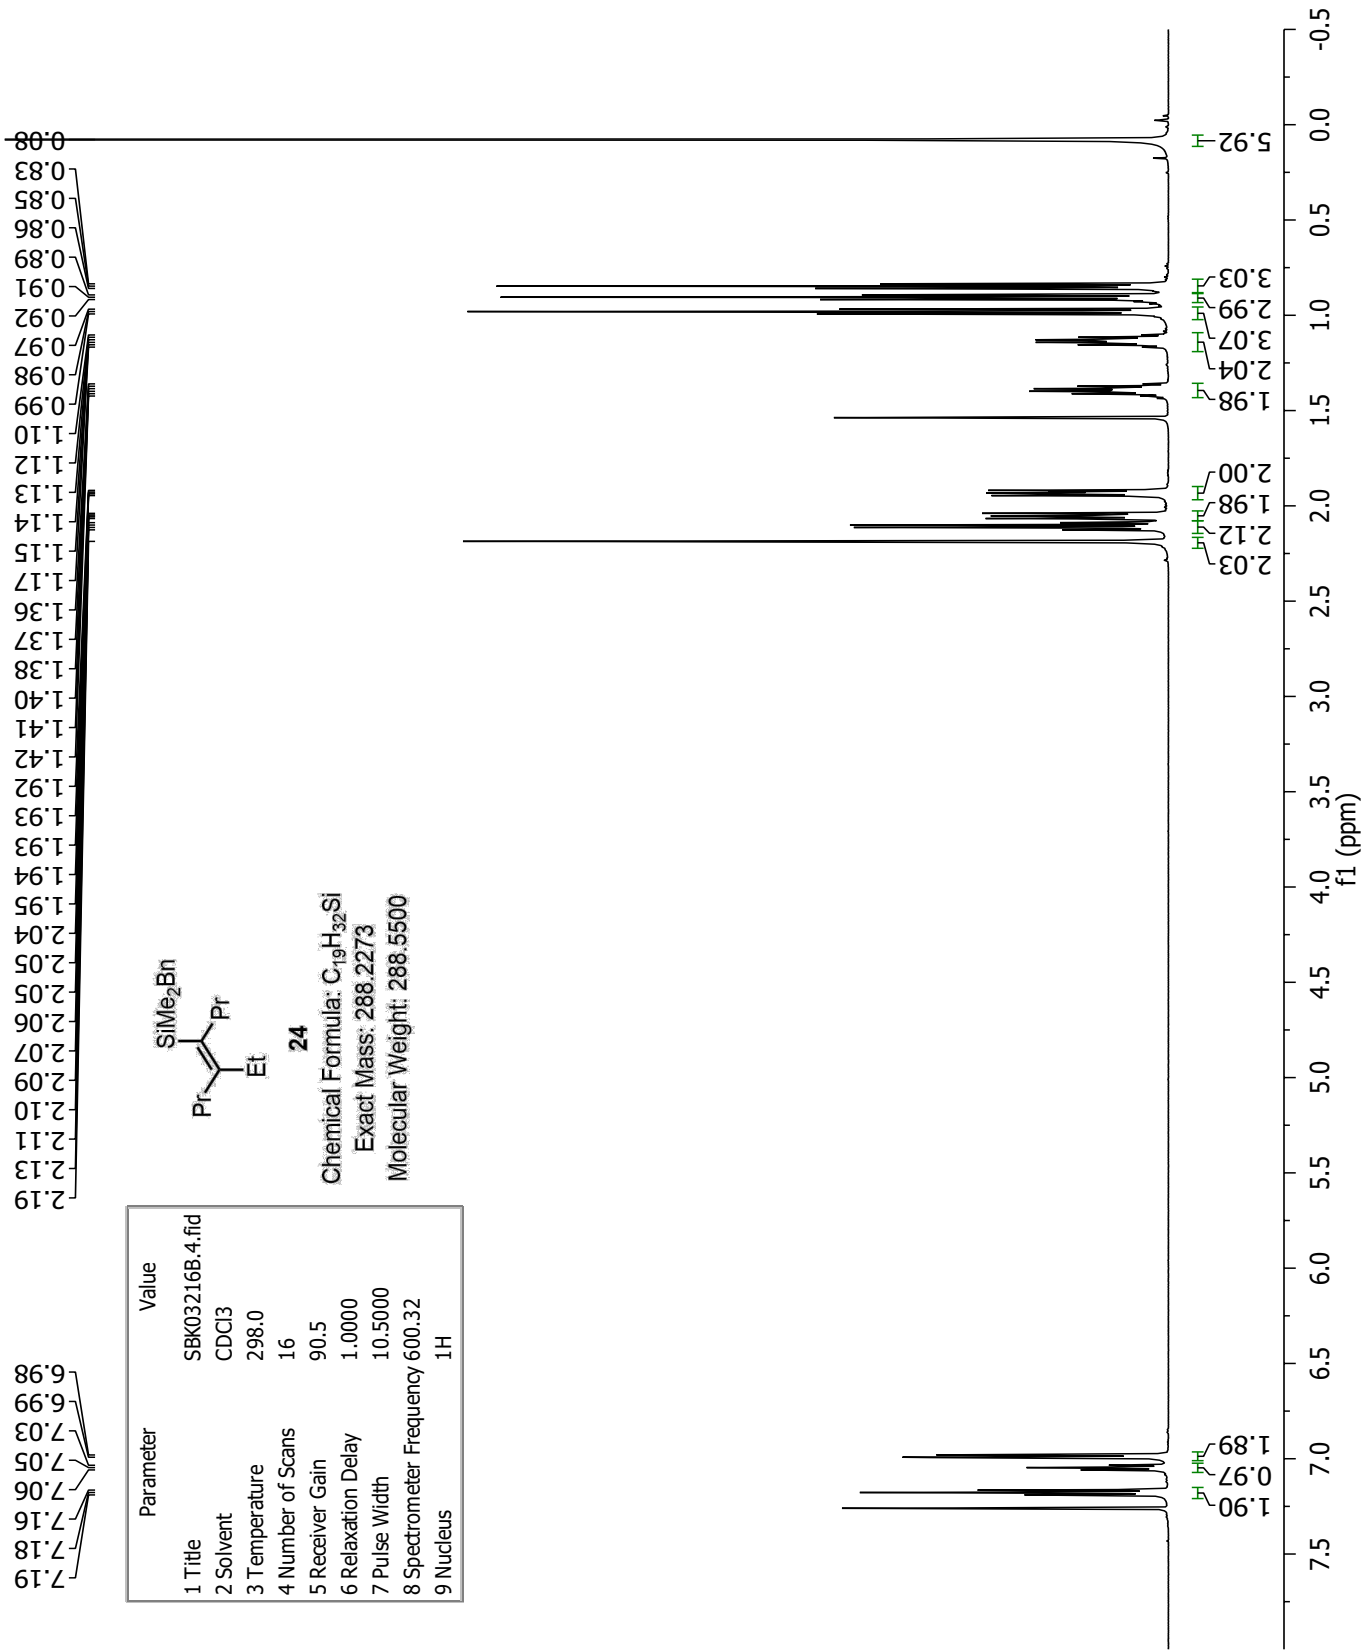

38.55  
 34.05  
 27.46  
 24.49  
 24.19  
 22.72  
 14.57  
 14.50  
 13.77  
 -0.76

154.51  
 140.83  
 130.82  
 128.44  
 128.06  
 123.91

| Parameter                | Value               |
|--------------------------|---------------------|
| 1 Title                  | SBK03216B-noe.3.fid |
| 2 Solvent                | CDCl3               |
| 3 Temperature            | 298.2               |
| 4 Number of Scans        | 1024                |
| 5 Receiver Gain          | 512.0               |
| 6 Relaxation Delay       | 3.0000              |
| 7 Pulse Width            | 9.2500              |
| 8 Spectrometer Frequency | 100.62              |
| 9 Nucleus                | <sup>13</sup> C     |

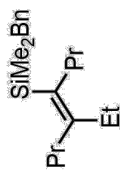

**24**

Chemical Formula: C<sub>19</sub>H<sub>32</sub>Si  
 Exact Mass: 288.2273  
 Molecular Weight: 288.5500

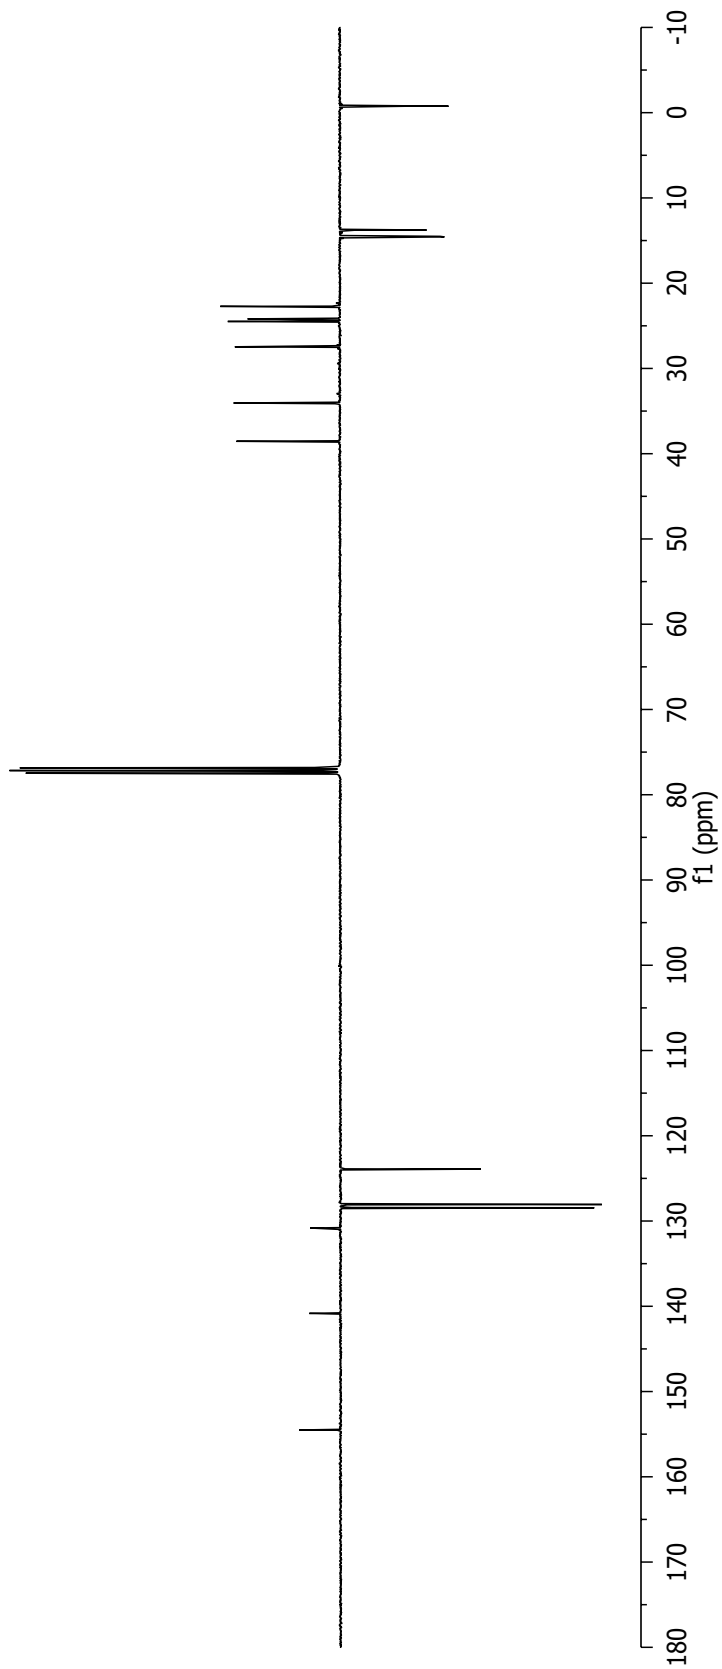

—6.73

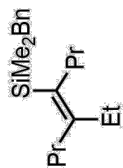

**24**

Chemical Formula: C<sub>19</sub>H<sub>32</sub>Si  
Exact Mass: 288.2273  
Molecular Weight: 288.5500

| Parameter                | Value           |
|--------------------------|-----------------|
| 1 Title                  | SBK03216B.2.fid |
| 2 Solvent                | CDCI3           |
| 3 Temperature            | 298.0           |
| 4 Number of Scans        | 256             |
| 5 Receiver Gain          | 1030.0          |
| 6 Relaxation Delay       | 12.5000         |
| 7 Pulse Width            | 13.5000         |
| 8 Spectrometer Frequency | 119.26          |
| 9 Nucleus                | 29Si            |

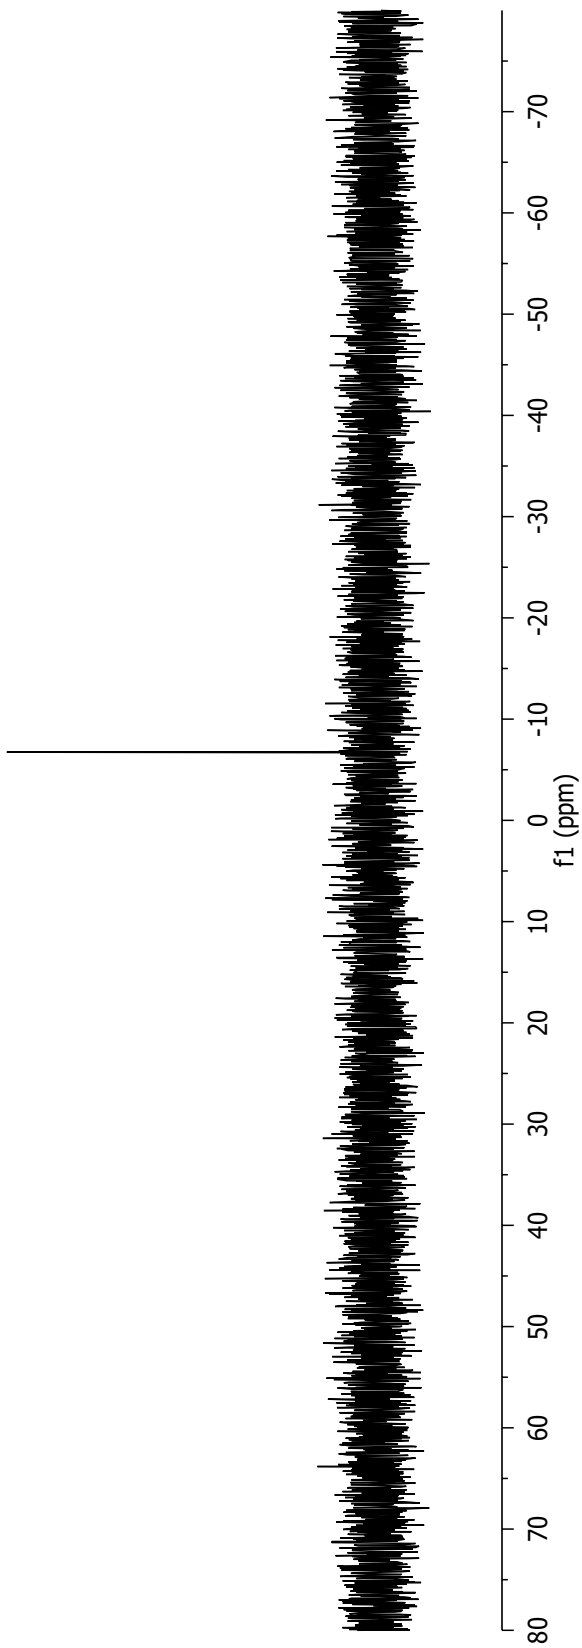

| Parameter                | Value           |
|--------------------------|-----------------|
| 1 Title                  | SBK03229B.1.fid |
| 2 Solvent                | CDCl3           |
| 3 Temperature            | 298.2           |
| 4 Number of Scans        | 16              |
| 5 Receiver Gain          | 114.0           |
| 6 Relaxation Delay       | 1.0000          |
| 7 Pulse Width            | 10.5000         |
| 8 Spectrometer Frequency | 600.32          |
| 9 Nucleus                | 1H              |

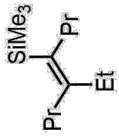

**25**

Chemical Formula: C<sub>13</sub>H<sub>28</sub>Si

Exact Mass: 212.1960

Molecular Weight: 212.4520

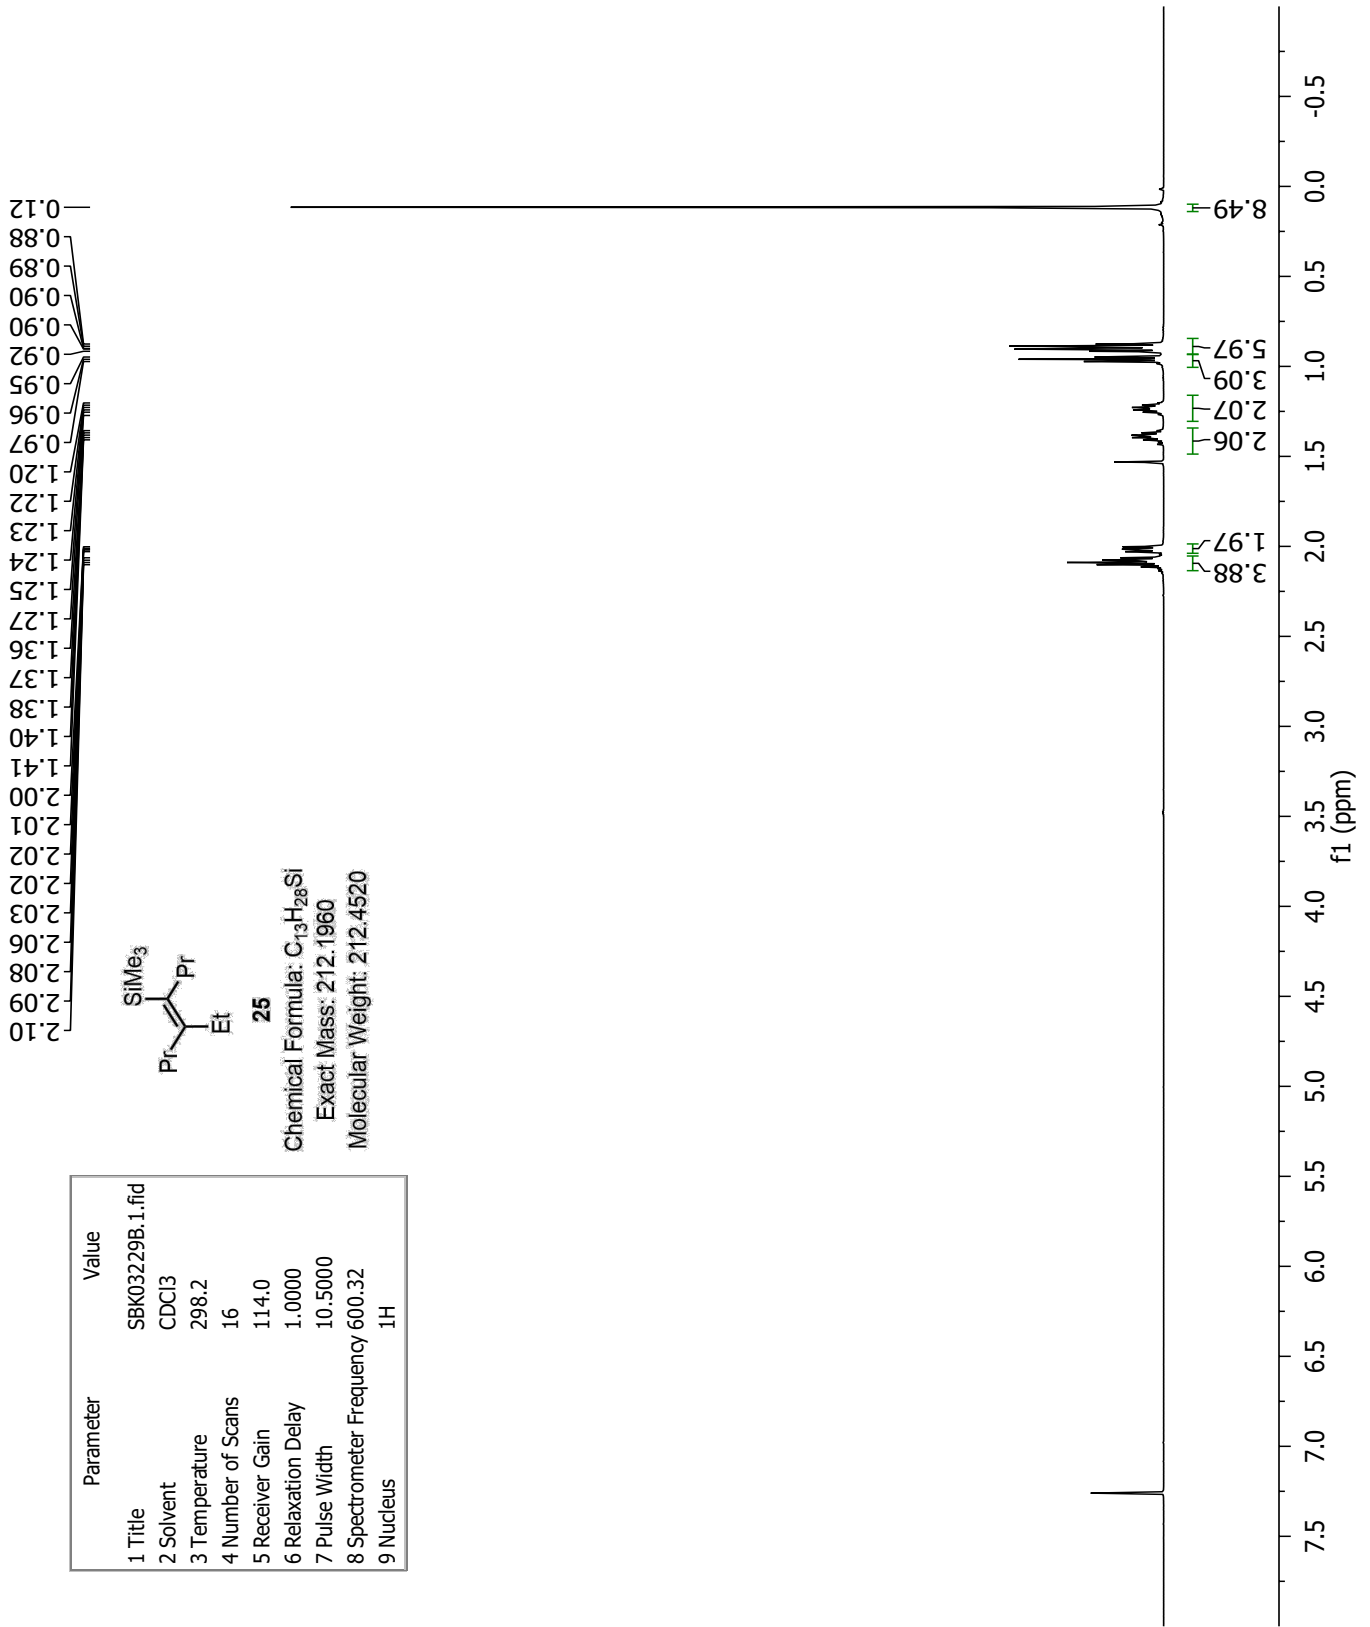

— 153.36  
— 132.70

| Parameter                | Value           |
|--------------------------|-----------------|
| 1 Title                  | SBK03229B.2.fid |
| 2 Solvent                | CDCl3           |
| 3 Temperature            | 300.3           |
| 4 Number of Scans        | 1024            |
| 5 Receiver Gain          | 2050.0          |
| 6 Relaxation Delay       | 5.0000          |
| 7 Pulse Width            | 10.6300         |
| 8 Spectrometer Frequency | 150.97          |
| 9 Nucleus                | <sup>13</sup> C |

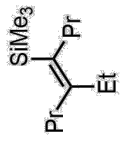

**25**

Chemical Formula: C<sub>13</sub>H<sub>28</sub>Si  
Exact Mass: 212.1960  
Molecular Weight: 212.4520

— 38.47  
— 34.06  
— 24.64  
— 24.18  
— 22.76  
— 14.48  
— 14.40  
— 13.82  
— 1.39

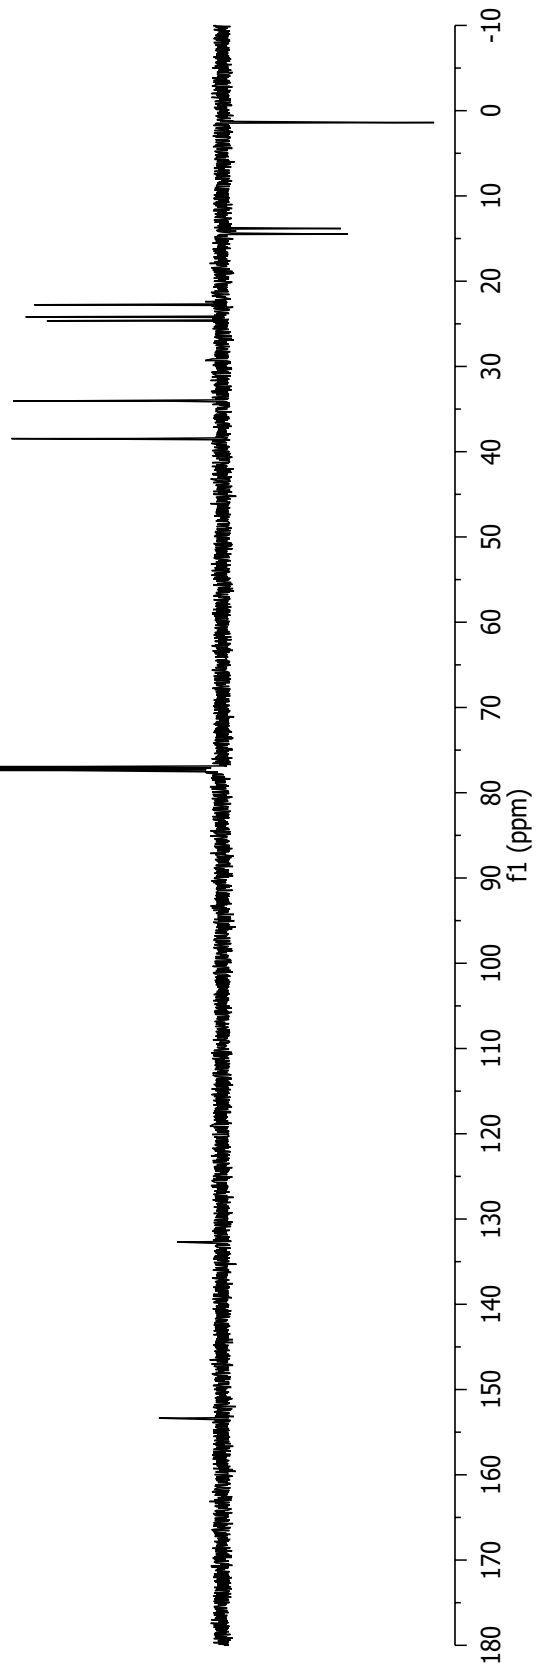

-7.81

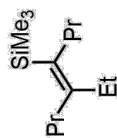

**25**

Chemical Formula: C<sub>13</sub>H<sub>28</sub>Si  
Exact Mass: 212.1960  
Molecular Weight: 212.4520

| Parameter                | Value             |
|--------------------------|-------------------|
| 1 Title                  | SBK03229B.3.fid   |
| 2 Solvent                | CDCl <sub>3</sub> |
| 3 Temperature            | 297.7             |
| 4 Number of Scans        | 256               |
| 5 Receiver Gain          | 1030.0            |
| 6 Relaxation Delay       | 12.5000           |
| 7 Pulse Width            | 13.5000           |
| 8 Spectrometer Frequency | 119.26            |
| 9 Nucleus                | <sup>29</sup> Si  |

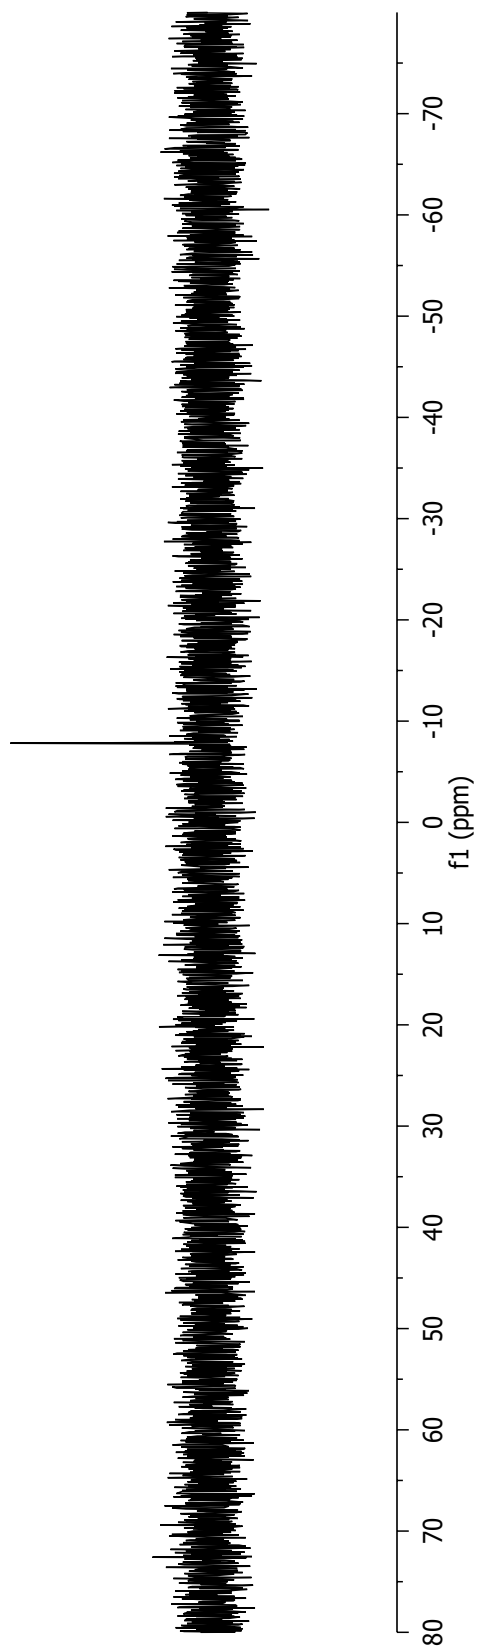



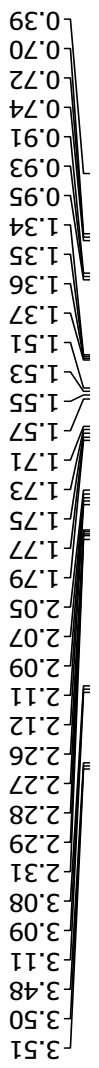

| Parameter                | Value           |
|--------------------------|-----------------|
| 1 Title                  | SBK04017B.1.fid |
| 2 Solvent                | CDCl3           |
| 3 Temperature            | 298.2           |
| 4 Number of Scans        | 16              |
| 5 Receiver Gain          | 5.7             |
| 6 Relaxation Delay       | 1.0000          |
| 7 Pulse Width            | 15.0000         |
| 8 Spectrometer Frequency | 400.13          |
| 9 Nucleus                | 1H              |

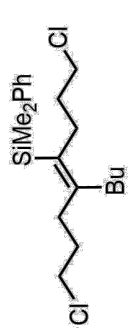

**26**  
 Chemical Formula: C<sub>20</sub>H<sub>32</sub>Cl<sub>2</sub>Si  
 Exact Mass: 370.1650  
 Molecular Weight: 371.4610

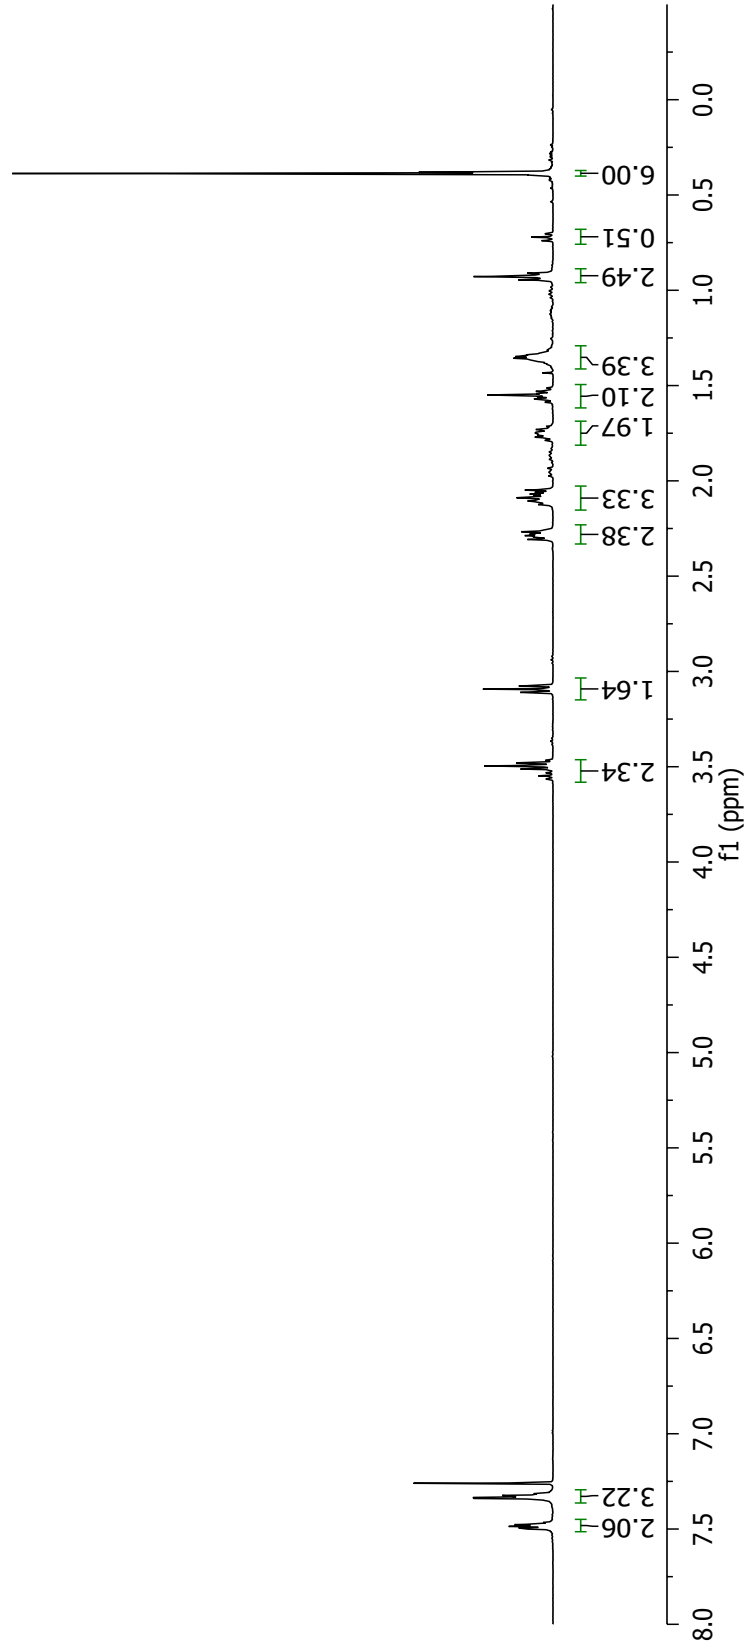

| Parameter                | Value           |
|--------------------------|-----------------|
| 1 Title                  | SBK04017B.2.fid |
| 2 Solvent                | CDCl3           |
| 3 Temperature            | 298.1           |
| 4 Number of Scans        | 1024            |
| 5 Receiver Gain          | 512.0           |
| 6 Relaxation Delay       | 3.0000          |
| 7 Pulse Width            | 10.7000         |
| 8 Spectrometer Frequency | 100.62          |
| 9 Nucleus                | <sup>13</sup> C |

| Parameter                | Value           |
|--------------------------|-----------------|
| 1 Title                  | SBK04017B.2.fid |
| 2 Solvent                | CDCl3           |
| 3 Temperature            | 298.1           |
| 4 Number of Scans        | 1024            |
| 5 Receiver Gain          | 512.0           |
| 6 Relaxation Delay       | 3.0000          |
| 7 Pulse Width            | 10.7000         |
| 8 Spectrometer Frequency | 100.62          |
| 9 Nucleus                | <sup>13</sup> C |

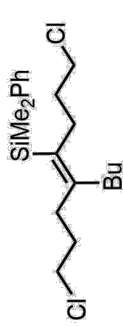

**26**

Chemical Formula: C<sub>20</sub>H<sub>32</sub>Cl<sub>2</sub>Si

Exact Mass: 370.1650

Molecular Weight: 371.4610

|       |       |       |       |       |       |       |       |       |       |       |
|-------|-------|-------|-------|-------|-------|-------|-------|-------|-------|-------|
| 45.26 | 44.93 | 34.44 | 34.02 | 32.01 | 31.38 | 31.15 | 29.39 | 23.24 | 14.22 | -0.09 |
|-------|-------|-------|-------|-------|-------|-------|-------|-------|-------|-------|

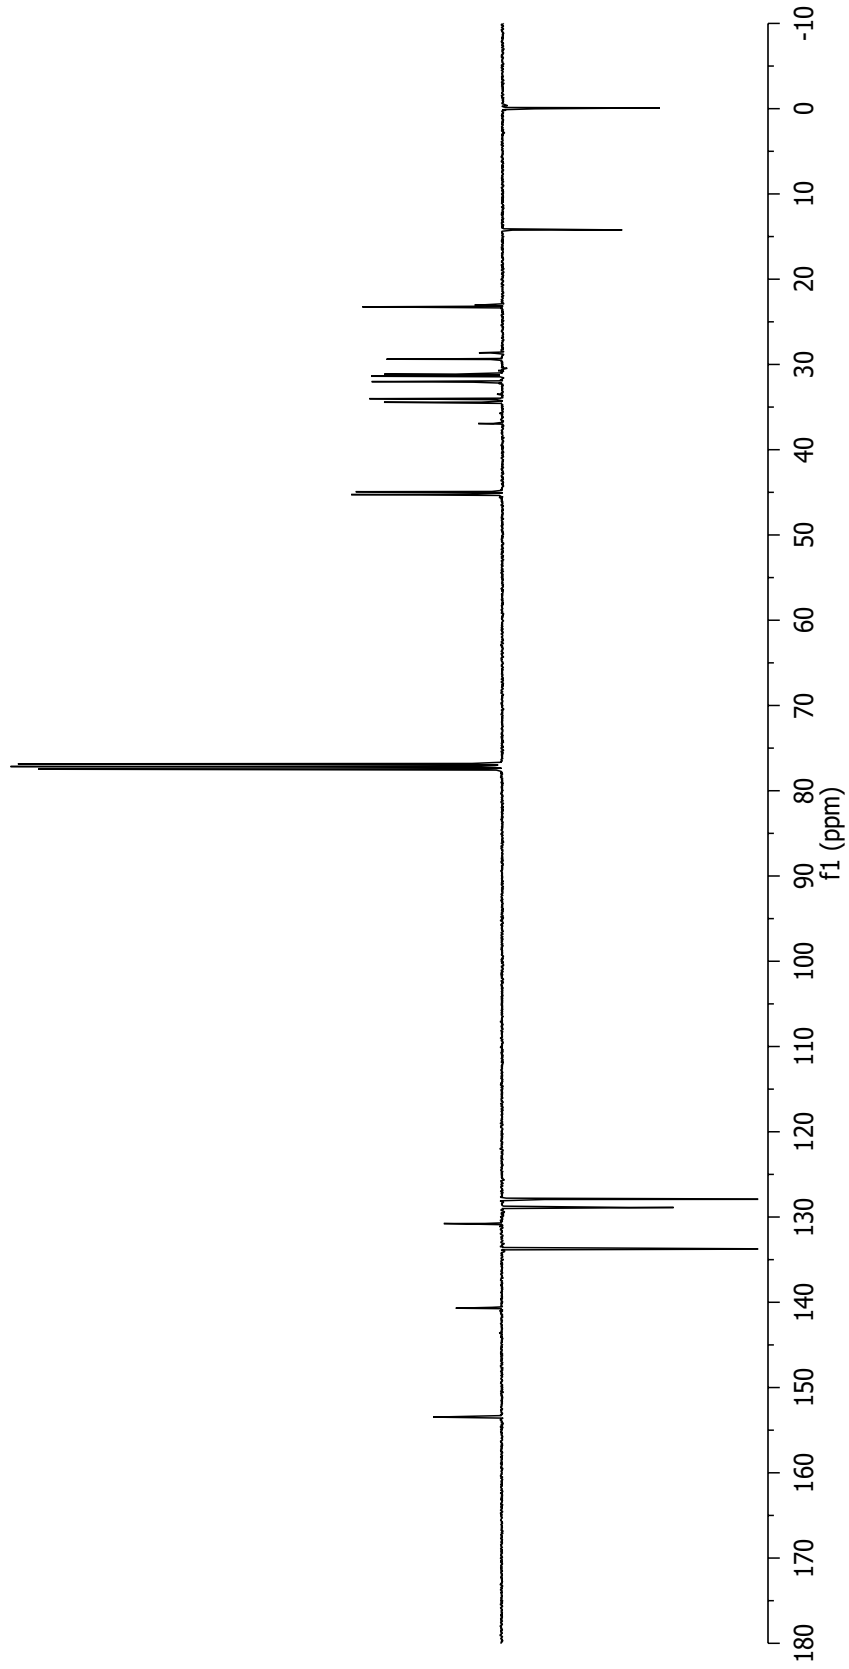

68.01

| Parameter                | Value              |
|--------------------------|--------------------|
| 1 Title                  | SBK04017B-Si.1.fid |
| 2 Solvent                | CDCl3              |
| 3 Temperature            | 300.0              |
| 4 Number of Scans        | 256                |
| 5 Receiver Gain          | 1620.0             |
| 6 Relaxation Delay       | 12.5000            |
| 7 Pulse Width            | 13.5000            |
| 8 Spectrometer Frequency | 119.26             |
| 9 Nucleus                | 29Si               |

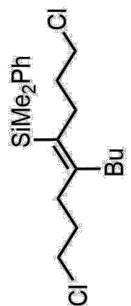

**26**  
Chemical Formula: C<sub>20</sub>H<sub>32</sub>Cl<sub>2</sub>Si  
Exact Mass: 370.1650  
Molecular Weight: 371.4610

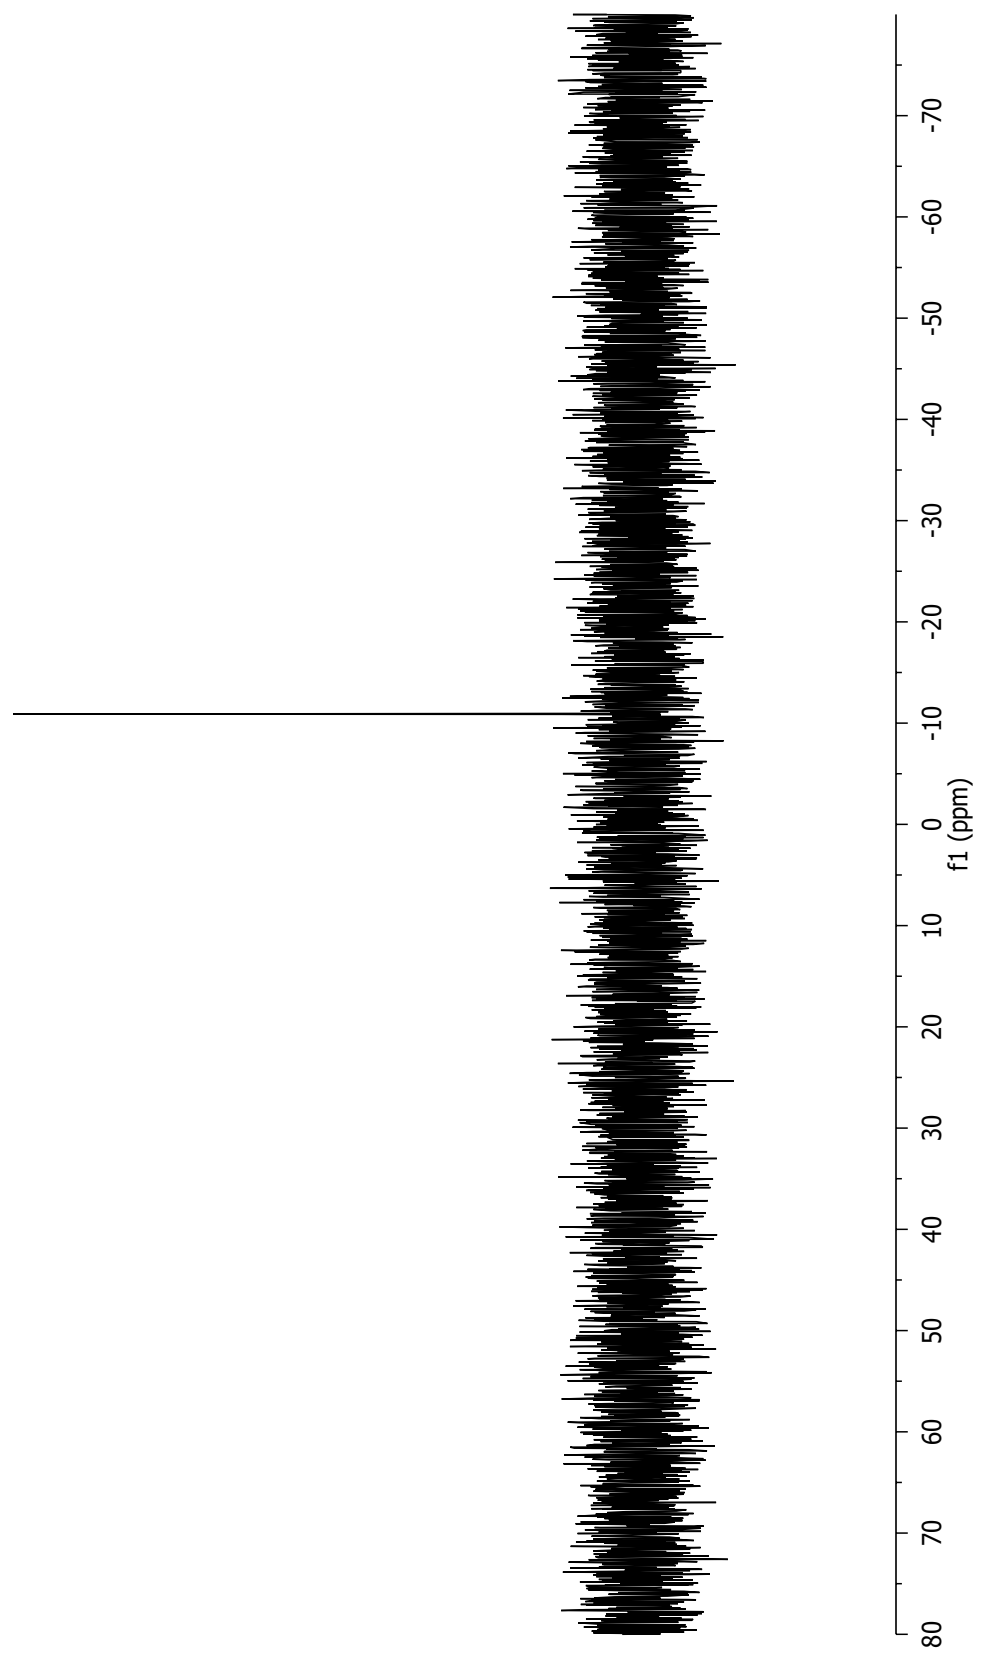

7.49  
7.49  
7.48  
7.47  
7.33  
7.32  
7.32  
7.32  
7.30

| Parameter                | Value           |
|--------------------------|-----------------|
| 1 Title                  | SBK04093B.1.fid |
| 2 Solvent                | CDCl3           |
| 3 Temperature            | 298.2           |
| 4 Number of Scans        | 16              |
| 5 Receiver Gain          | 10.1            |
| 6 Relaxation Delay       | 1.0000          |
| 7 Pulse Width            | 15.0000         |
| 8 Spectrometer Frequency | 400.13          |
| 9 Nucleus                | <sup>1</sup> H  |

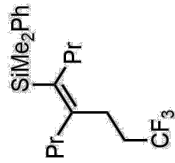

**27**

Chemical Formula: C<sub>19</sub>H<sub>29</sub>F<sub>3</sub>Si  
 Exact Mass: 342.1991  
 Molecular Weight: 342.5212

1.32  
1.29  
1.28  
1.18  
1.16  
1.14  
0.91  
0.90  
0.88  
0.65  
0.63  
0.61  
0.37

2.38  
2.36  
2.35  
2.34  
2.17  
2.14  
2.12  
2.11  
2.10  
2.08  
1.94  
1.93  
1.92  
1.91  
1.90

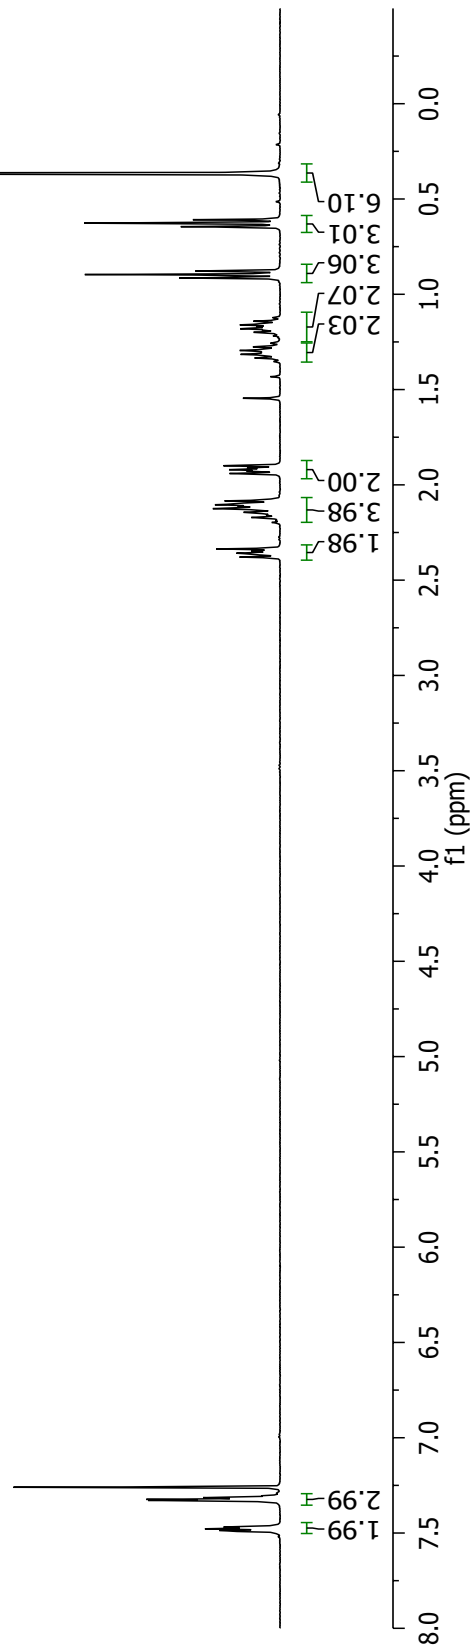

149.41  
140.73  
134.05  
133.73  
131.22  
128.72  
128.47  
127.81  
125.72  
122.96

| Parameter                | Value           |
|--------------------------|-----------------|
| 1 Title                  | SBK04093B.2.fid |
| 2 Solvent                | CDCl3           |
| 3 Temperature            | 298.2           |
| 4 Number of Scans        | 1024            |
| 5 Receiver Gain          | 512.0           |
| 6 Relaxation Delay       | 3.0000          |
| 7 Pulse Width            | 10.7000         |
| 8 Spectrometer Frequency | 100.62          |
| 9 Nucleus                | 13C             |

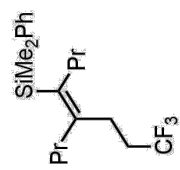

**27**  
 Chemical Formula: C<sub>19</sub>H<sub>29</sub>F<sub>3</sub>Si  
 Exact Mass: 342.1991  
 Molecular Weight: 342.5212

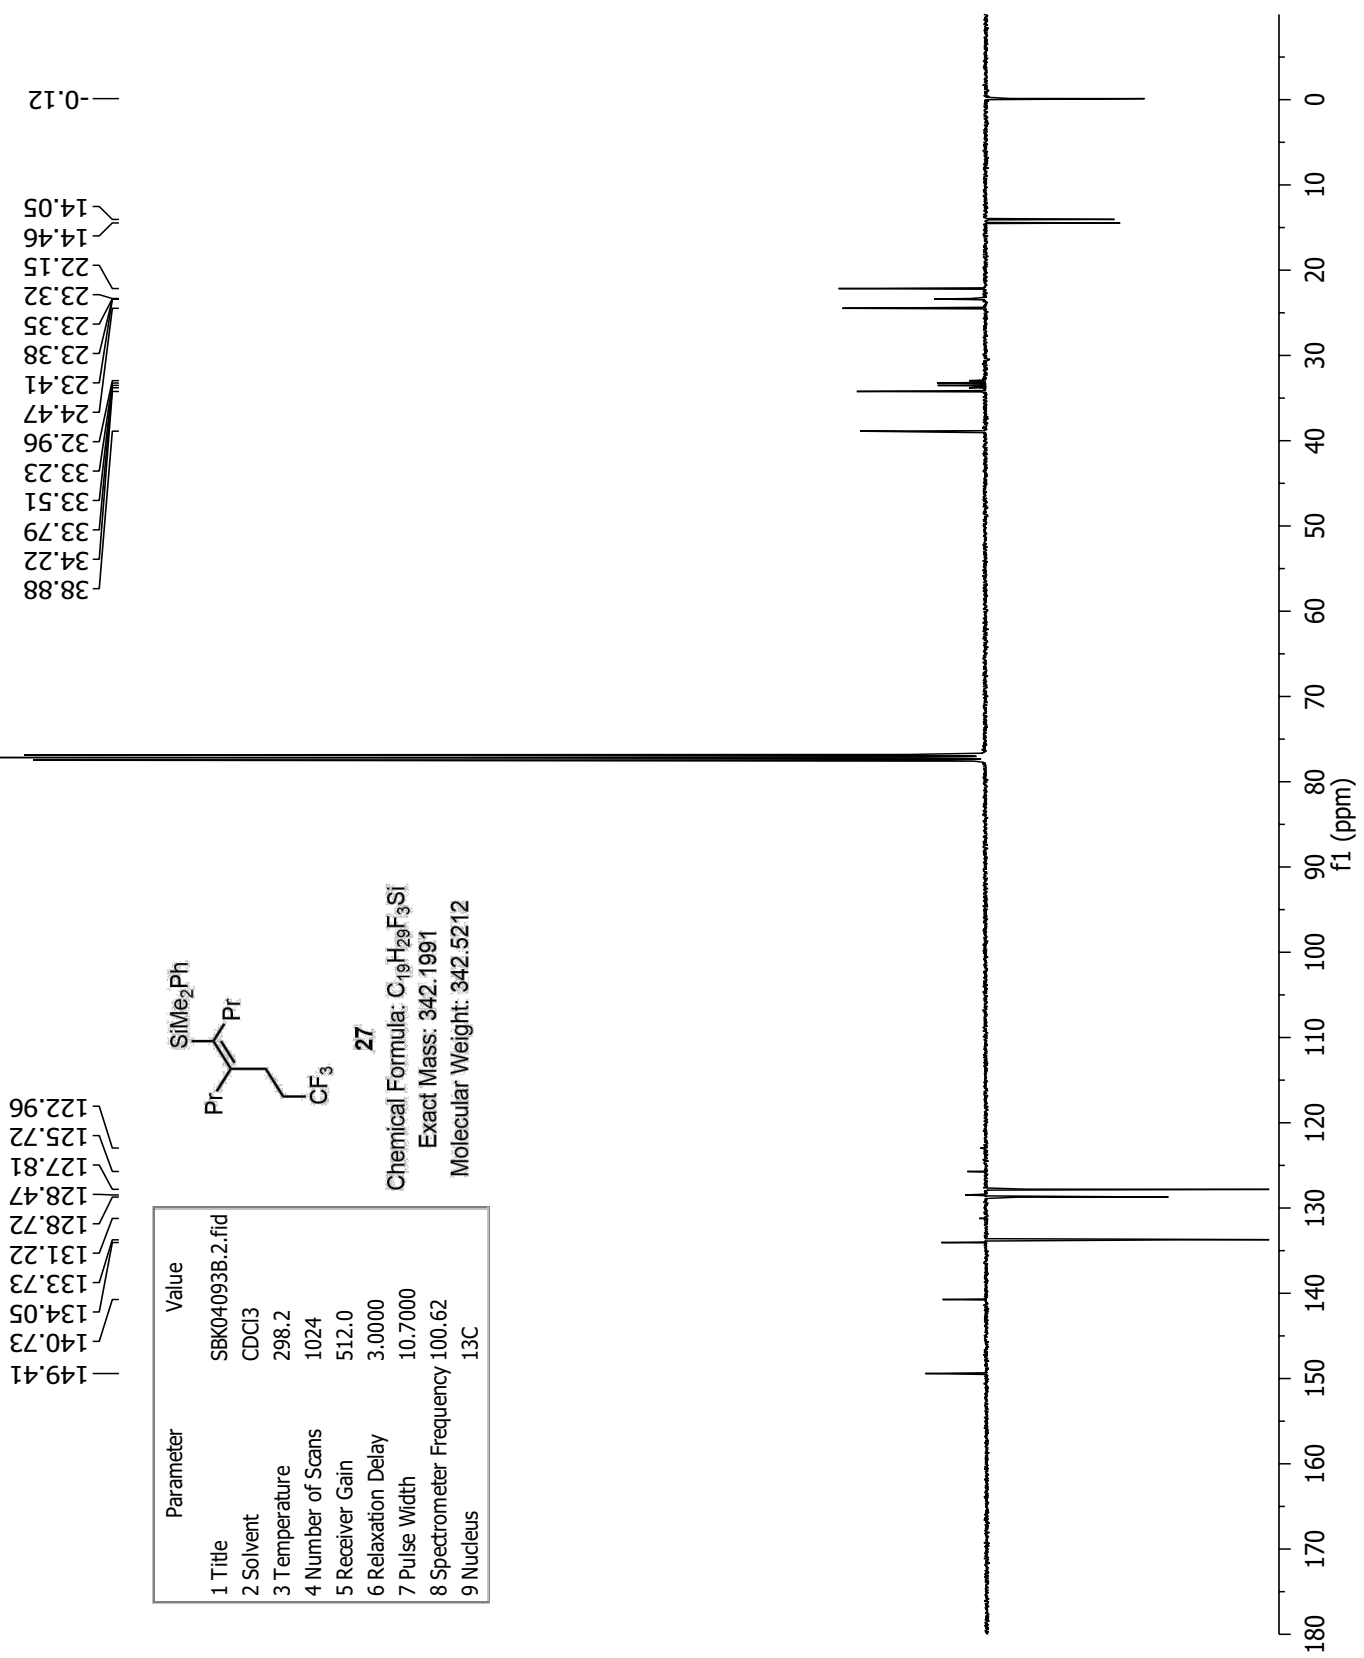

| Parameter                | Value              |
|--------------------------|--------------------|
| 1 Title                  | SBK04093B-Si.1.fid |
| 2 Solvent                | CDCl3              |
| 3 Temperature            | 300.0              |
| 4 Number of Scans        | 256                |
| 5 Receiver Gain          | 1030.0             |
| 6 Relaxation Delay       | 12.5000            |
| 7 Pulse Width            | 13.5000            |
| 8 Spectrometer Frequency | 119.26             |
| 9 Nucleus                | 29Si               |

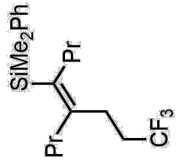

27

Chemical Formula: C<sub>19</sub>H<sub>29</sub>F<sub>3</sub>Si  
 Exact Mass: 342.1991  
 Molecular Weight: 342.5212

-10.74

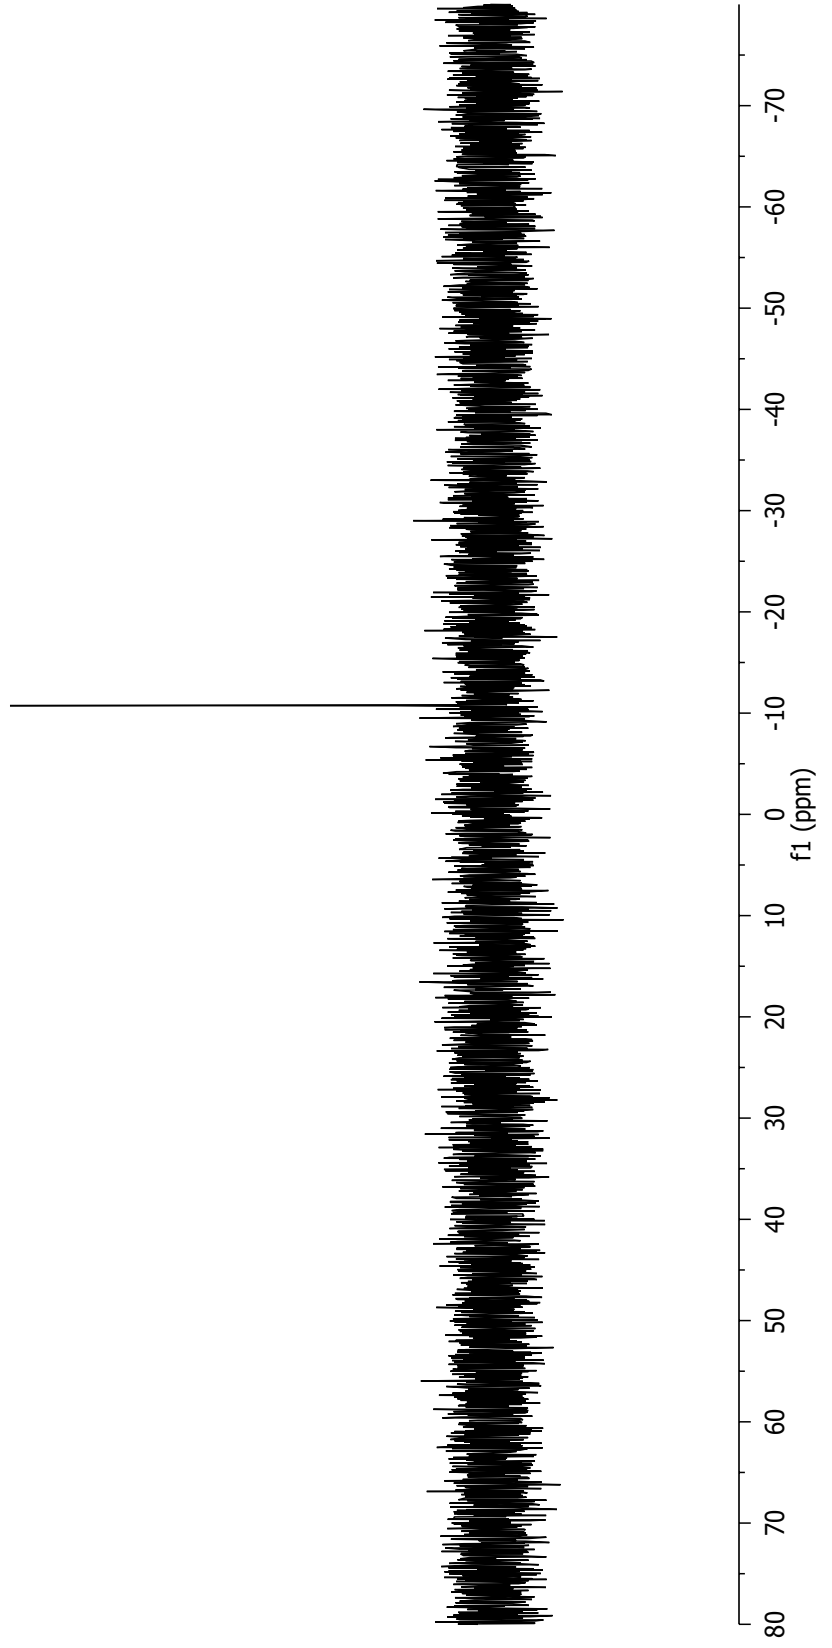

66.99

| Parameter                | Value               |
|--------------------------|---------------------|
| 1 Title                  | SBK04093B-19F.1.fid |
| 2 Solvent                | CDCl3               |
| 3 Temperature            | 300.0               |
| 4 Number of Scans        | 16                  |
| 5 Receiver Gain          | 322.0               |
| 6 Relaxation Delay       | 3.0000              |
| 7 Pulse Width            | 11.4000             |
| 8 Spectrometer Frequency | 564.81              |
| 9 Nucleus                | 19F                 |

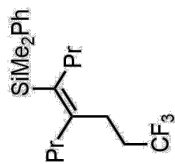

27

Chemical Formula: C<sub>19</sub>H<sub>29</sub>F<sub>3</sub>Si  
Exact Mass: 342.1991  
Molecular Weight: 342.5212

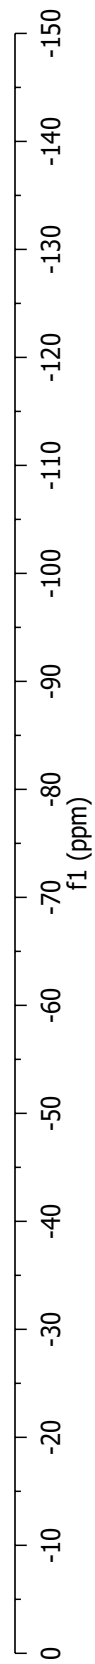

7.18  
7.17  
7.16  
7.02  
7.01  
6.88  
6.87  
6.85

| Parameter                | Value            |
|--------------------------|------------------|
| 1 Title                  | SBK03065B1.1.fid |
| 2 Solvent                | CDCl3            |
| 3 Temperature            | 300.0            |
| 4 Number of Scans        | 16               |
| 5 Receiver Gain          | 128.0            |
| 6 Relaxation Delay       | 1.0000           |
| 7 Pulse Width            | 10.7300          |
| 8 Spectrometer Frequency | 600.32           |
| 9 Nucleus                | <sup>1</sup> H   |

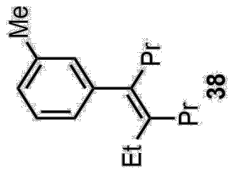

Chemical Formula: C<sub>17</sub>H<sub>26</sub>  
 Exact Mass: 230.2035  
 Molecular Weight: 230.3950

2.34  
2.27  
2.26  
2.24  
2.15  
2.14  
2.12  
1.82  
1.81  
1.49  
1.48  
1.47  
1.45  
1.44  
1.27  
1.26  
1.24  
1.22  
0.99  
0.97  
0.96  
0.87  
0.86  
0.84  
0.83

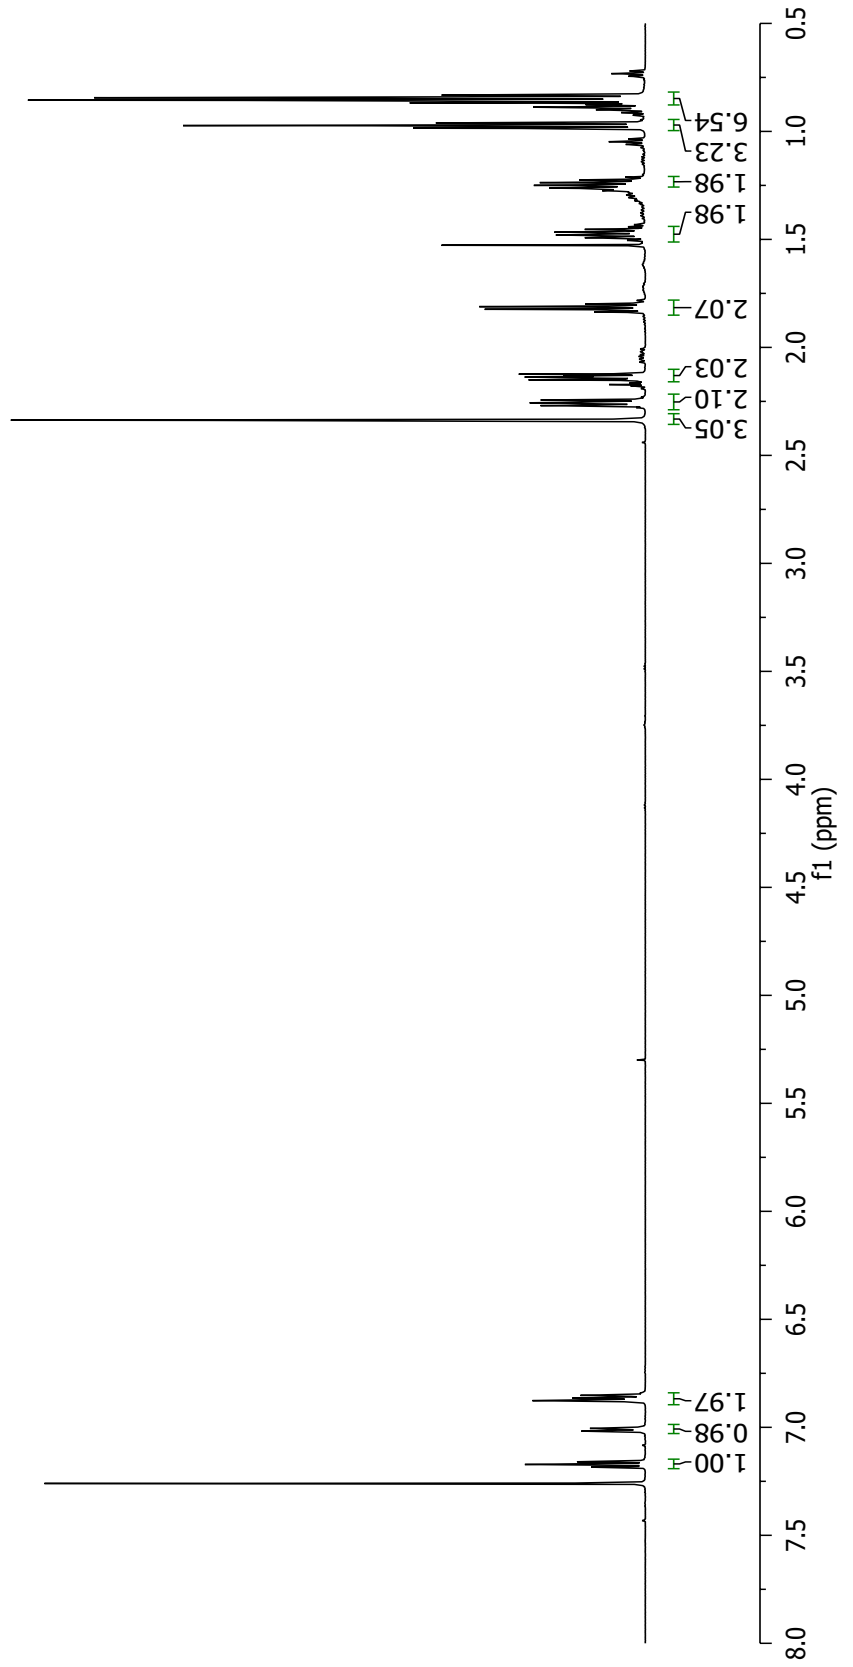



144.32  
137.34  
137.25  
136.02  
129.63  
127.71  
126.50  
126.08

| Parameter                | Value               |
|--------------------------|---------------------|
| 1 Title                  | SBK04065B-1_2.2.fid |
| 2 Solvent                | CDCl3               |
| 3 Temperature            | 298.2               |
| 4 Number of Scans        | 1024                |
| 5 Receiver Gain          | 512.0               |
| 6 Relaxation Delay       | 3.0000              |
| 7 Pulse Width            | 10.7000             |
| 8 Spectrometer Frequency | 100.62              |
| 9 Nucleus                | 13C                 |

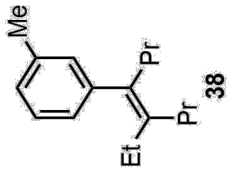

Chemical Formula: C<sub>17</sub>H<sub>16</sub>  
Exact Mass: 230.2035  
Molecular Weight: 230.3950

36.35  
32.56  
25.90  
22.37  
21.67  
14.58  
14.18  
13.88

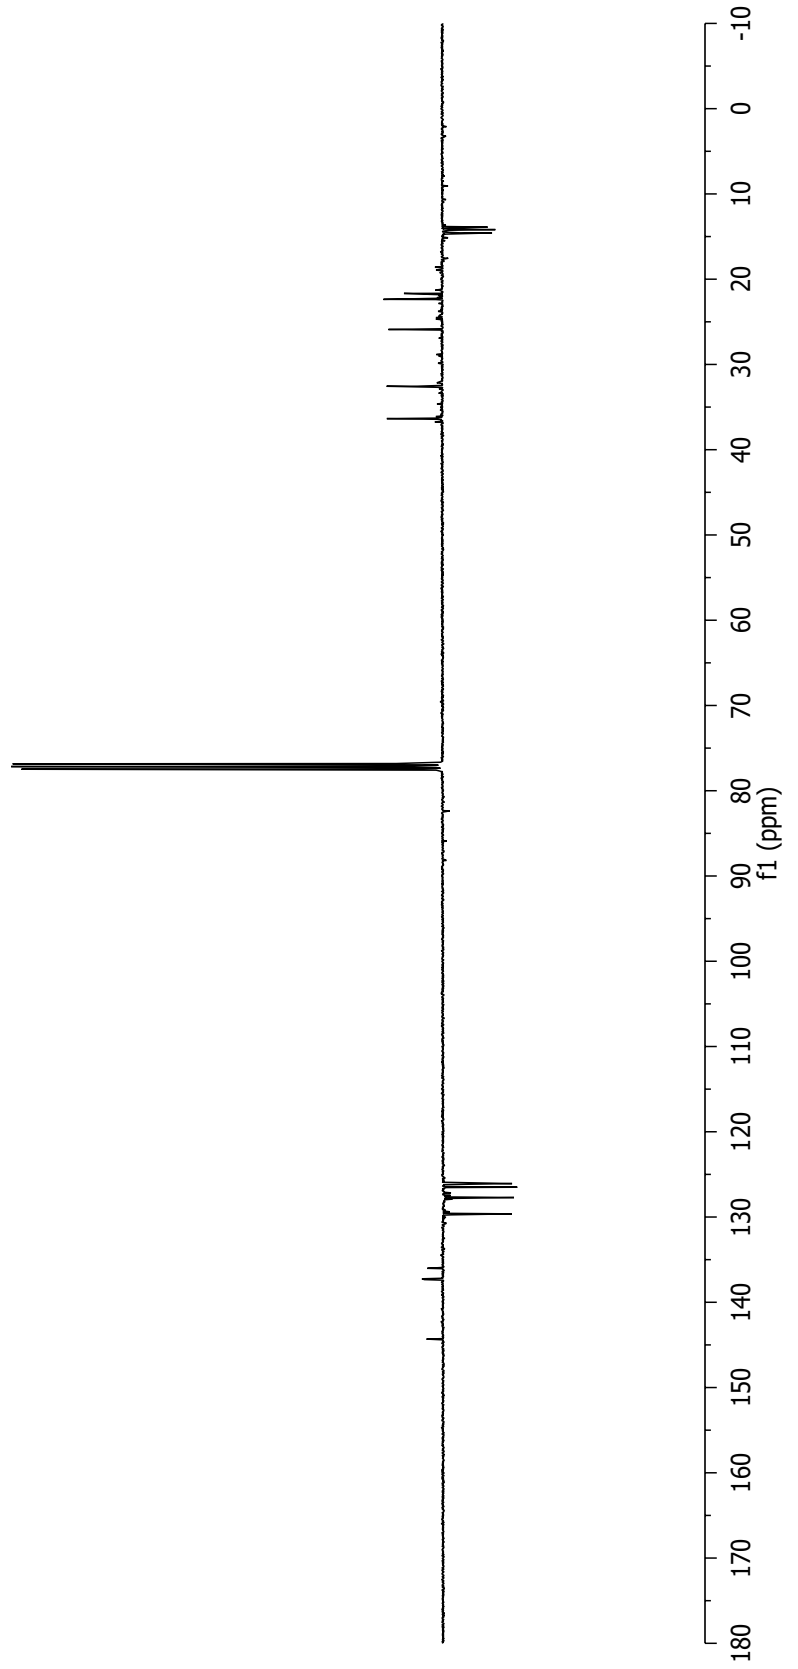

Supplement: NIHMS1611437-supplement-Supporting_Information.pdf [file NIHMS1611437-supplement-Supporting_Information.pdf]
